# Supplementary material for: Heterozygosity for neurodevelopmental disorder-associated TRIO variants yields distinct deficits in behavior, neuronal development, and synaptic transmission in mice
Source: eLife journal article supplement (doi:10.7554/elife.103620), 2024-12-20
Supplement: fig7-data4 [file elife-103620-fig7-data4-v1.zip]

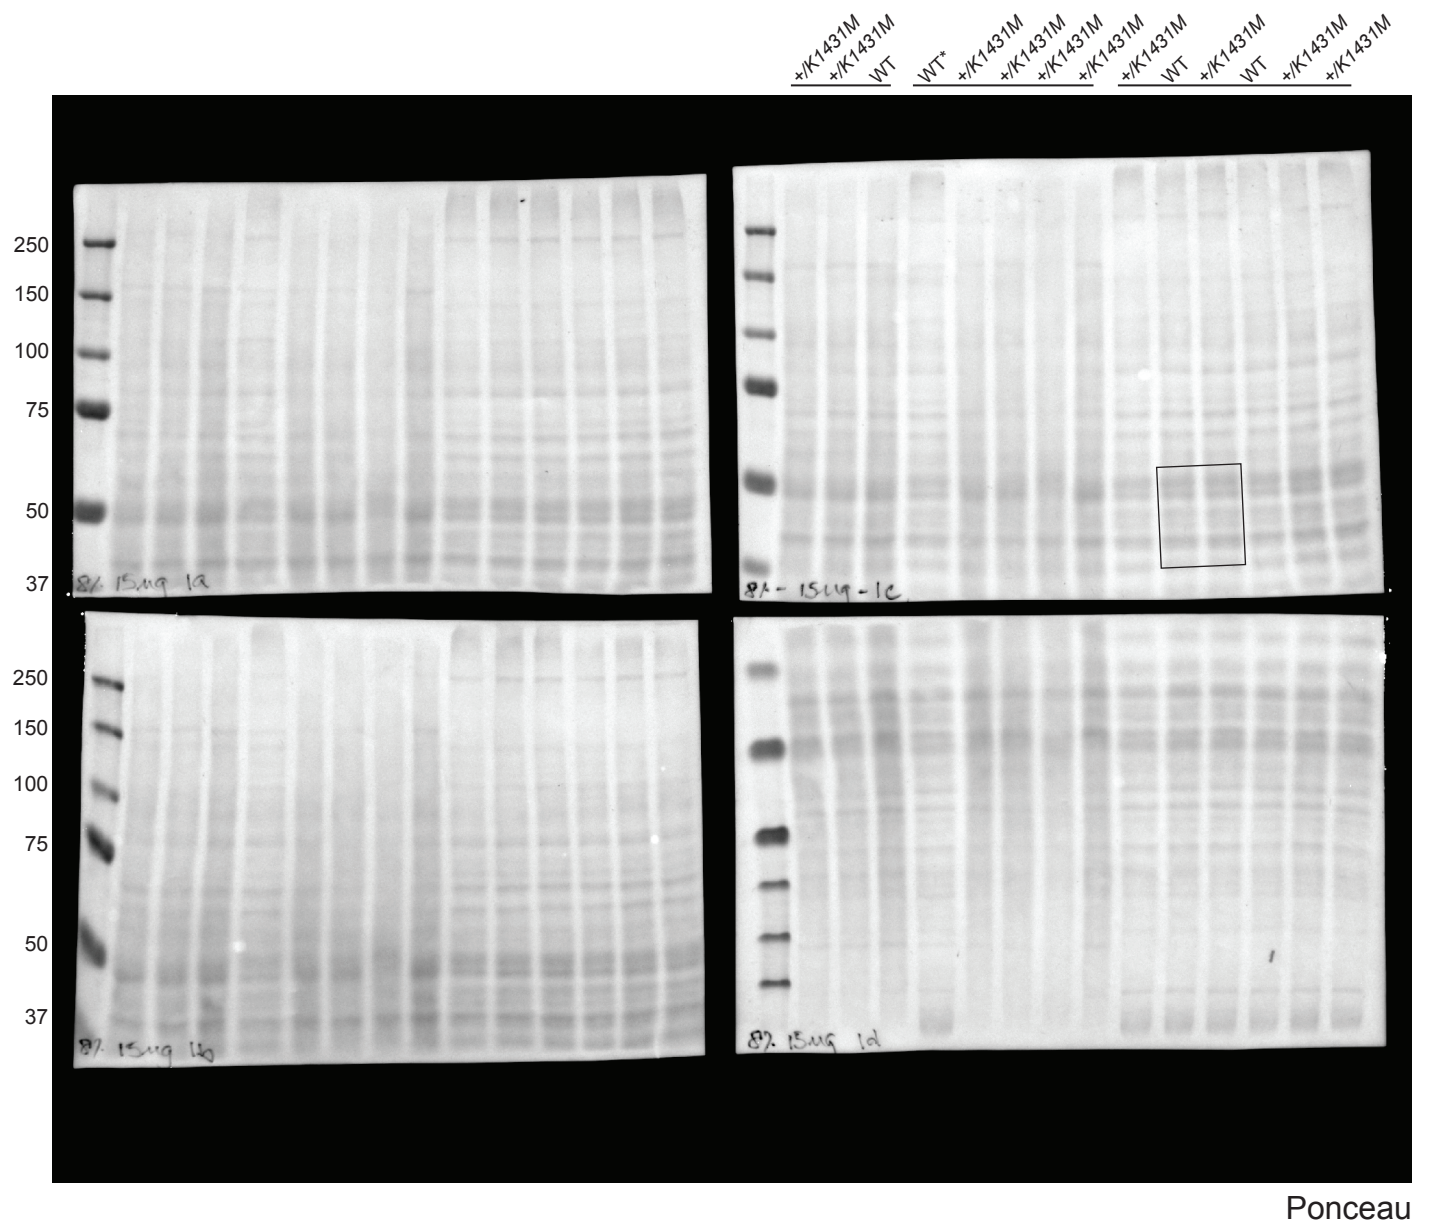

Ponceau

**Figure 7-source data4.** Original membranes corresponding to Figure 7, panel D.

15 µg cortical crude synaptosome preps from P39-P42 mice were separated by gel electrophoresis and stained by Ponceau S prior to immunoblotting. The same samples were run on four separate gels (1a, 1b, 1c, 1d) in the same loading order. WT\* indicates internal loading control. Lines denote littermates. Box indicates cropped image used in final figure.

+/K1918X WT +/K1918X +/K1918X +/K1918X WT +/K1918X +/K1918X +/K1918X WT WT +/K1918X WT\*

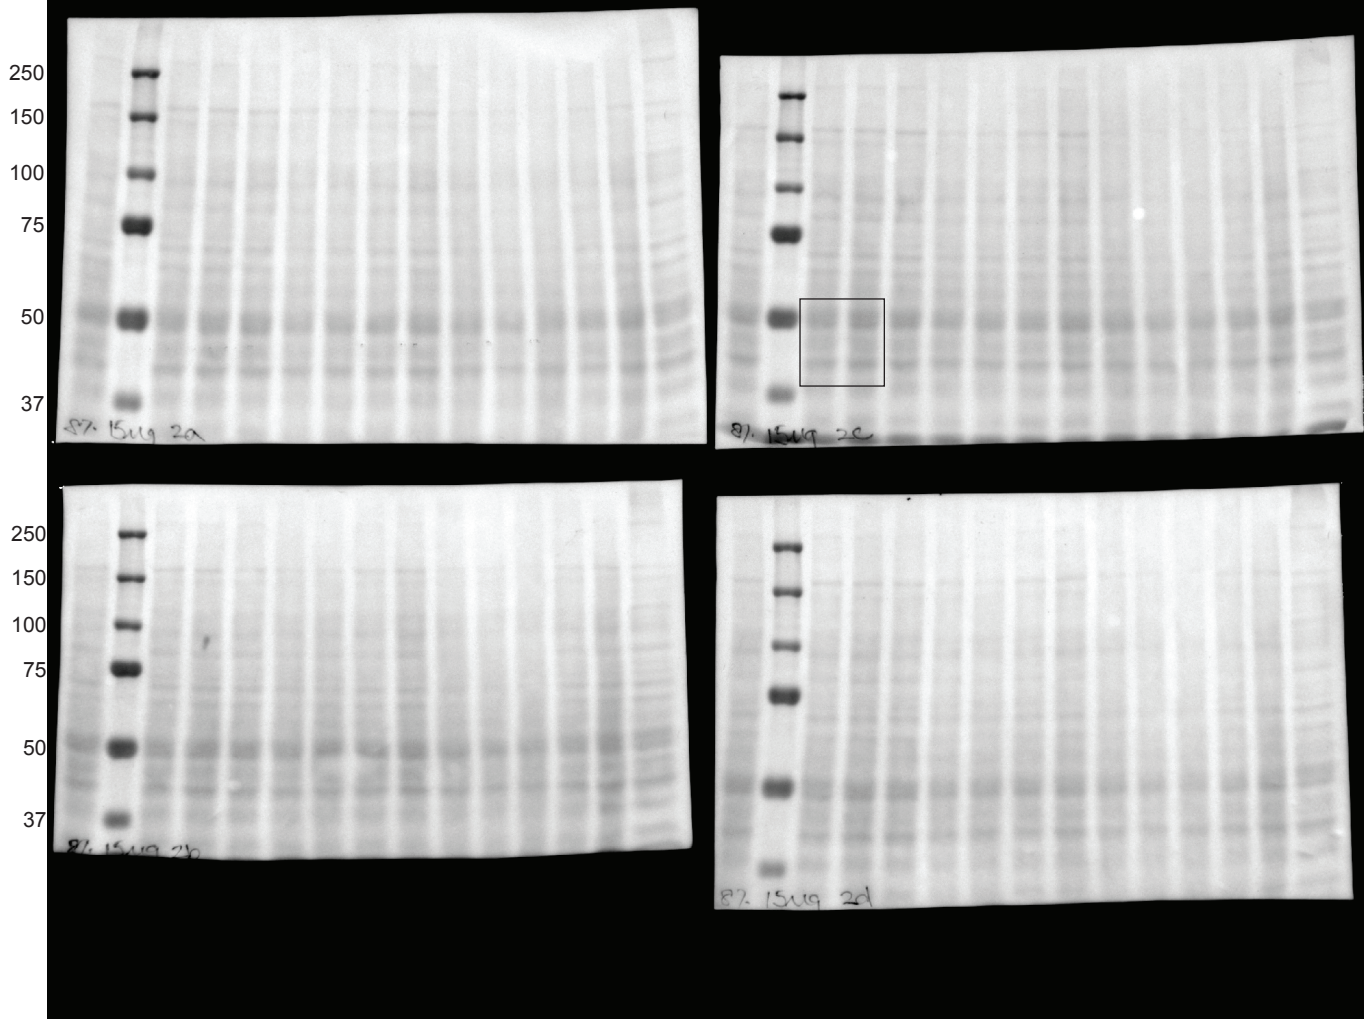

Ponceau

15 µg cortical crude synaptosome preps from P39-P42 mice were separated by gel electrophoresis and stained by Ponceau S prior to immunoblotting. The same samples were run on four separate gels (2a, 2b, 2c, 2d) in the same loading order. WT\* indicates internal loading control. Lines denote littermates. Box indicates cropped image used in final figure.



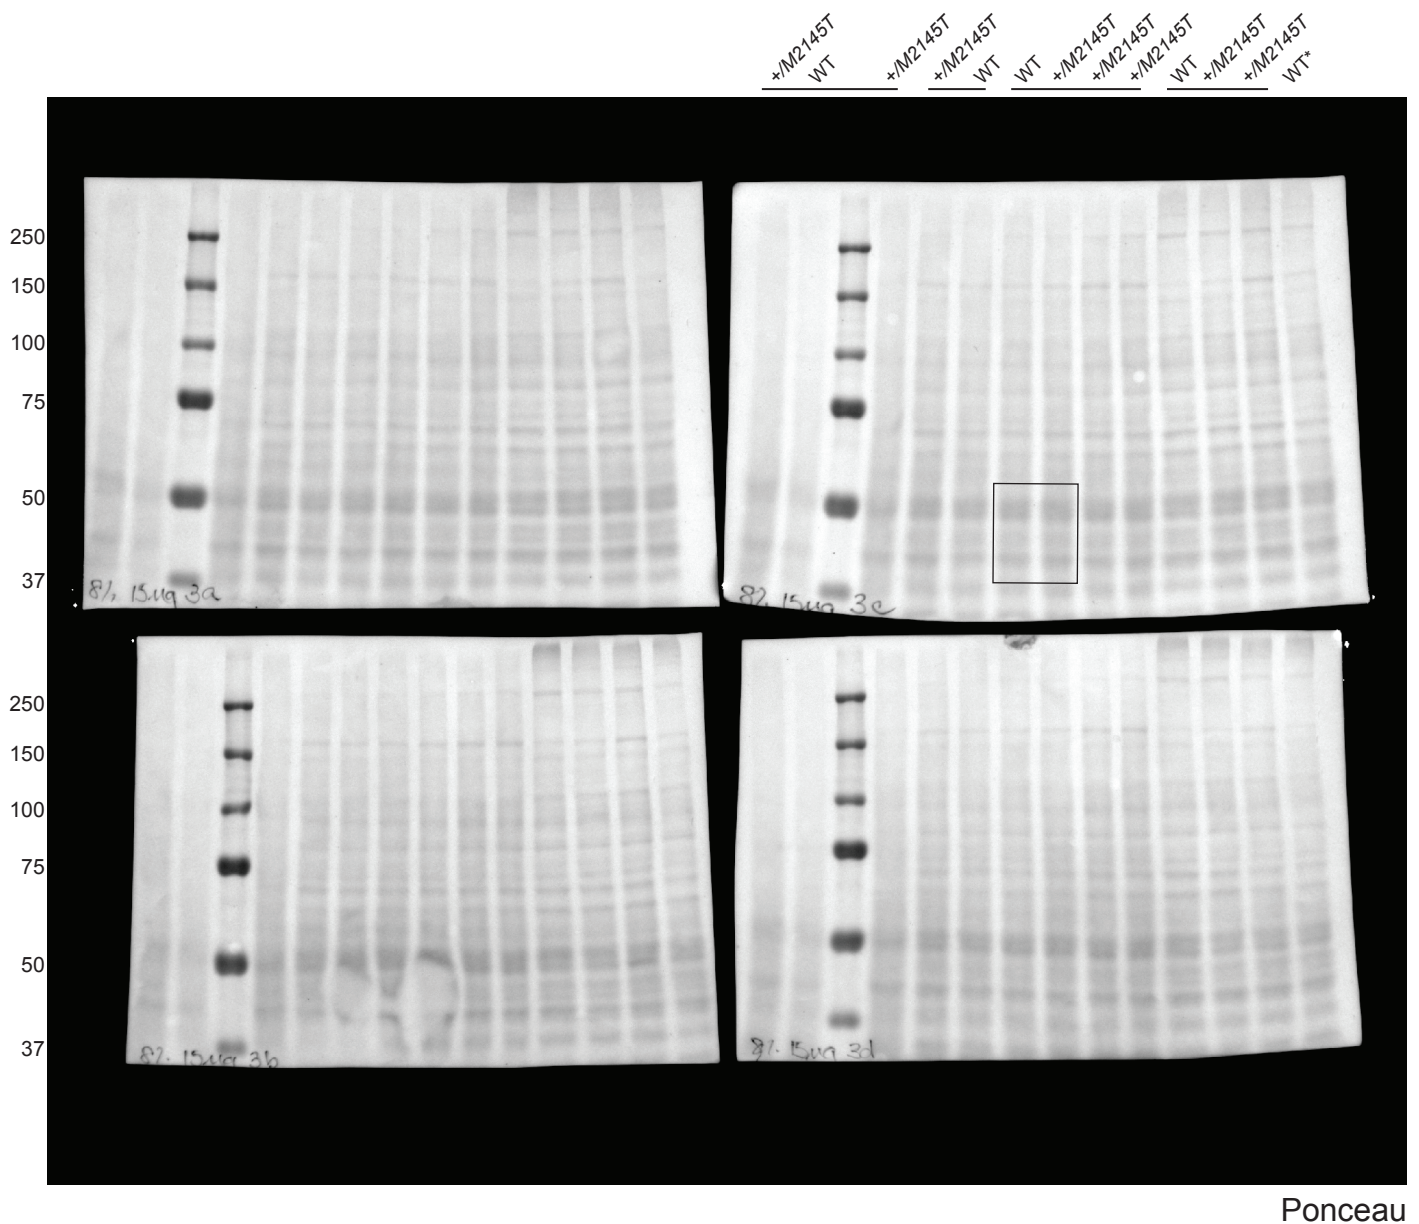

Ponceau

15  $\mu$ g cortical crude synaptosome preps from P39-P42 mice were separated by gel electrophoresis and stained by Ponceau S prior to immunoblotting. The same samples were run on four separate gels (3a, 3b, 3c, 3d) in the same loading order. WT\* indicates internal loading control. Lines denote littermates. Box indicates cropped image used in final figure.

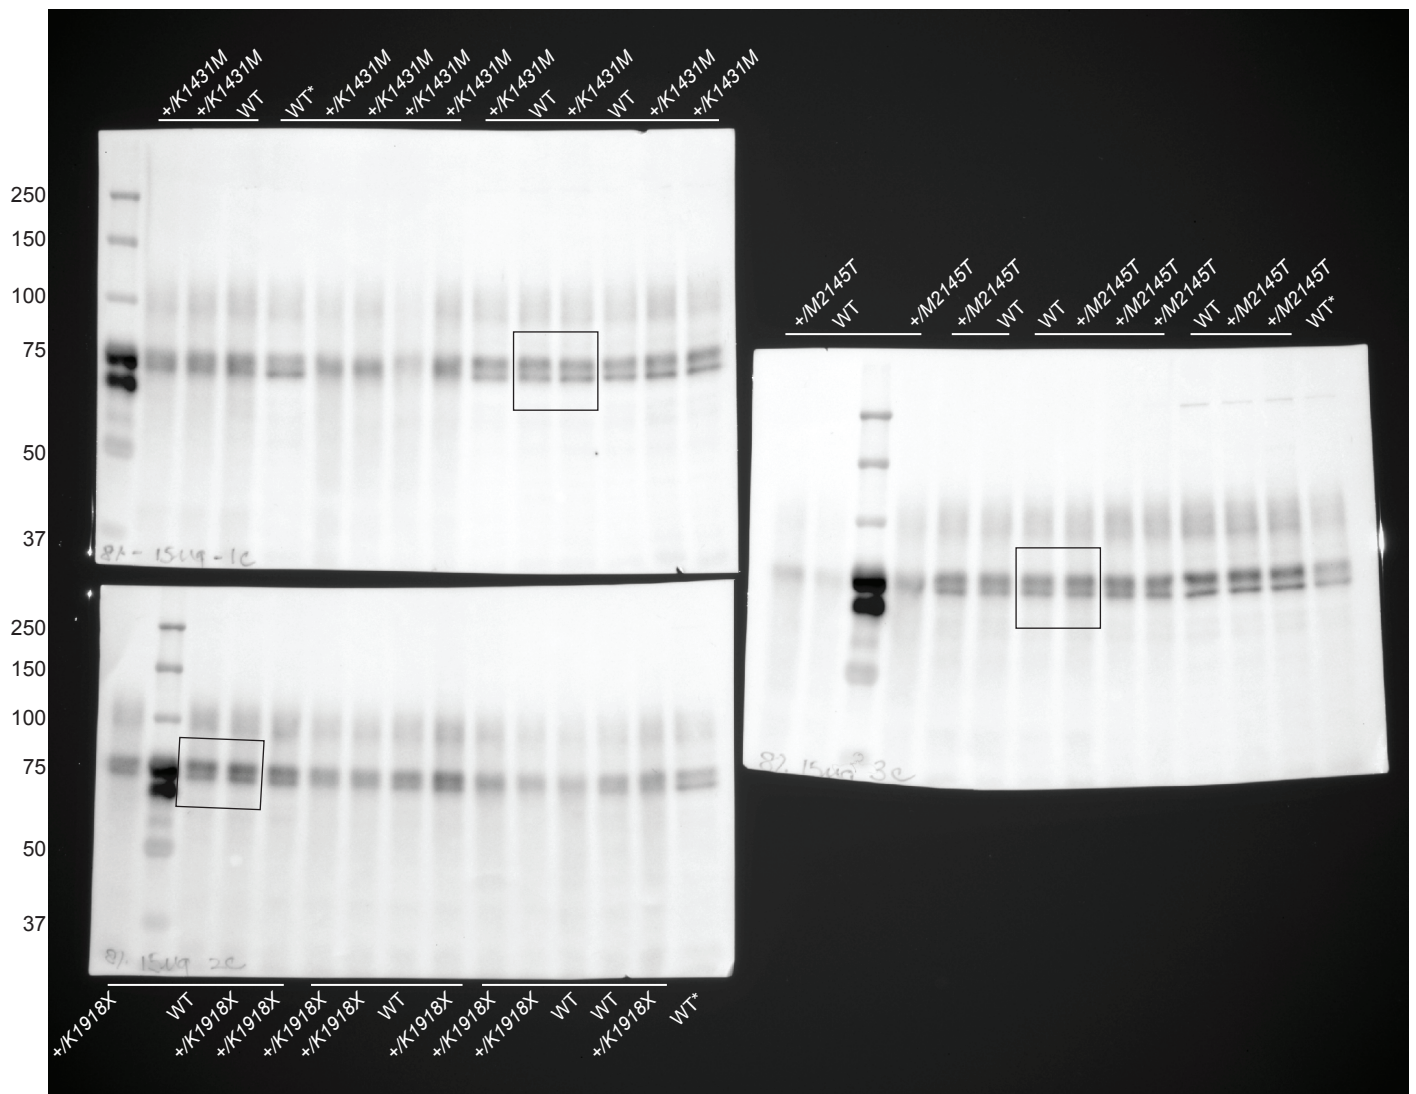

WB: Syt3

15 µg cortical crude synaptosome preps from P39-P42 mice were separated by gel electrophoresis and immunoblotted for synaptotagmin3 (Syt3). WT\* indicates internal loading control. Lines denote littermates. Boxes indicate cropped images used in final figure.



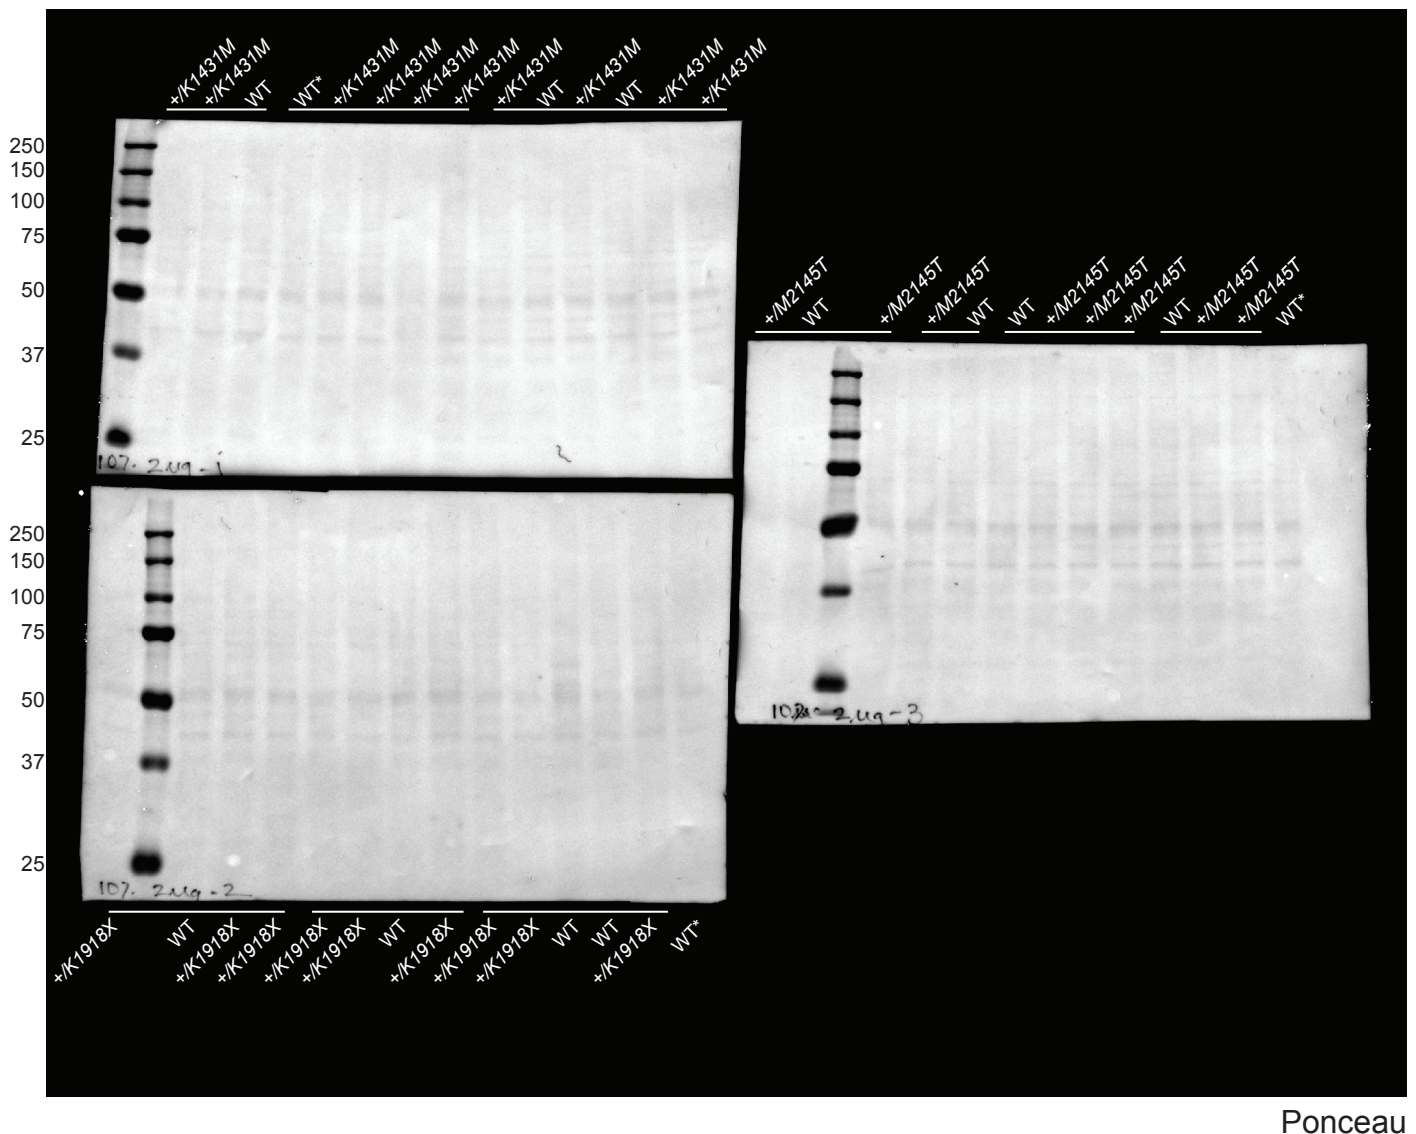

2 µg cortical crude synaptosome preps from P39-P42 mice were separated by gel electrophoresis and stained by Ponceau S prior to immunoblotting. WT\* indicates internal loading control. Lines denote littermates. Stained membranes were cut prior to blotting. Note: these membranes were used for normalization of Western blots (Munc18, Syt) but were not shown in final figures.

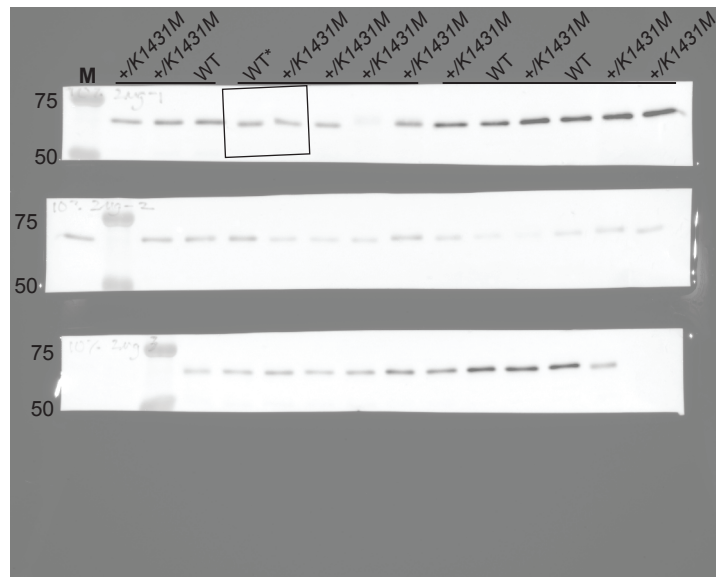

< K1431M litters

WB: Munc18

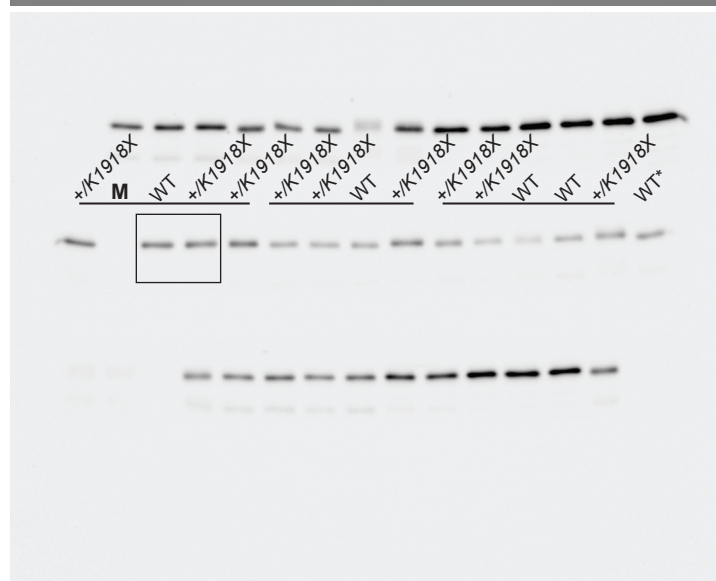

< K1918X litters

WB: Munc18

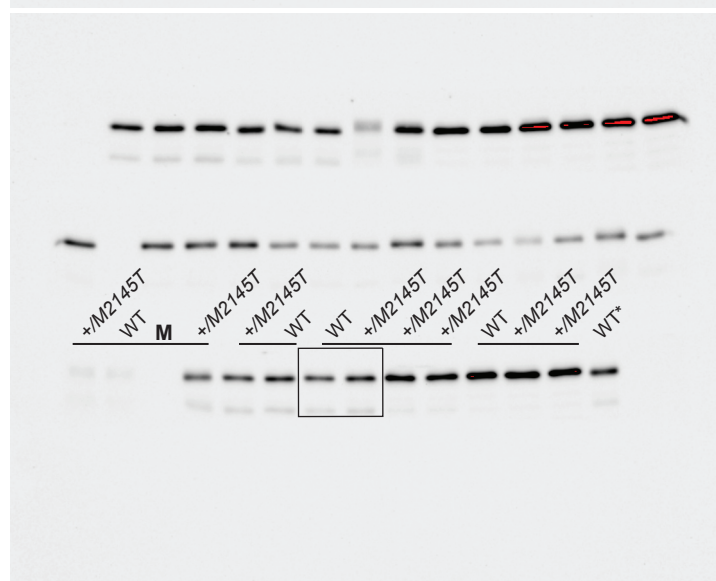

< M2145T litters

WB: Munc18

2  $\mu$ g cortical crude synaptosome preps from P39-P42 mice were separated by gel electrophoresis and immunoblotted for syntaxin binding protein 1 (Stxbp1, also known as Munc18-1). Lines denote littermates. The same blot at different exposures (30-60 sec) are shown. Boxes indicate cropped images used in final figure. M: Bio-Rad Protein Plus All Blue Protein Standard.



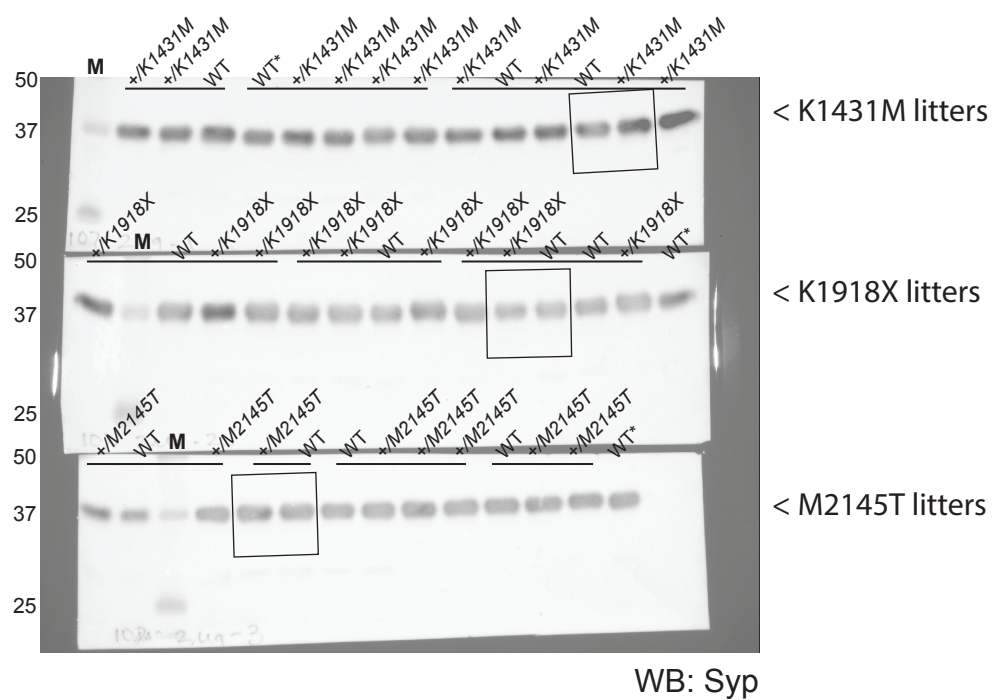

2  $\mu$ g cortical crude synaptosome preps from P39-P42 mice were separated by gel electrophoresis and immunoblotted for synaptophysin (Syp). WT\* indicates internal loading control. Lines denote littermates. Boxes indicate cropped images used in final figure. M: Bio-Rad Protein Plus All Blue Protein Standard.

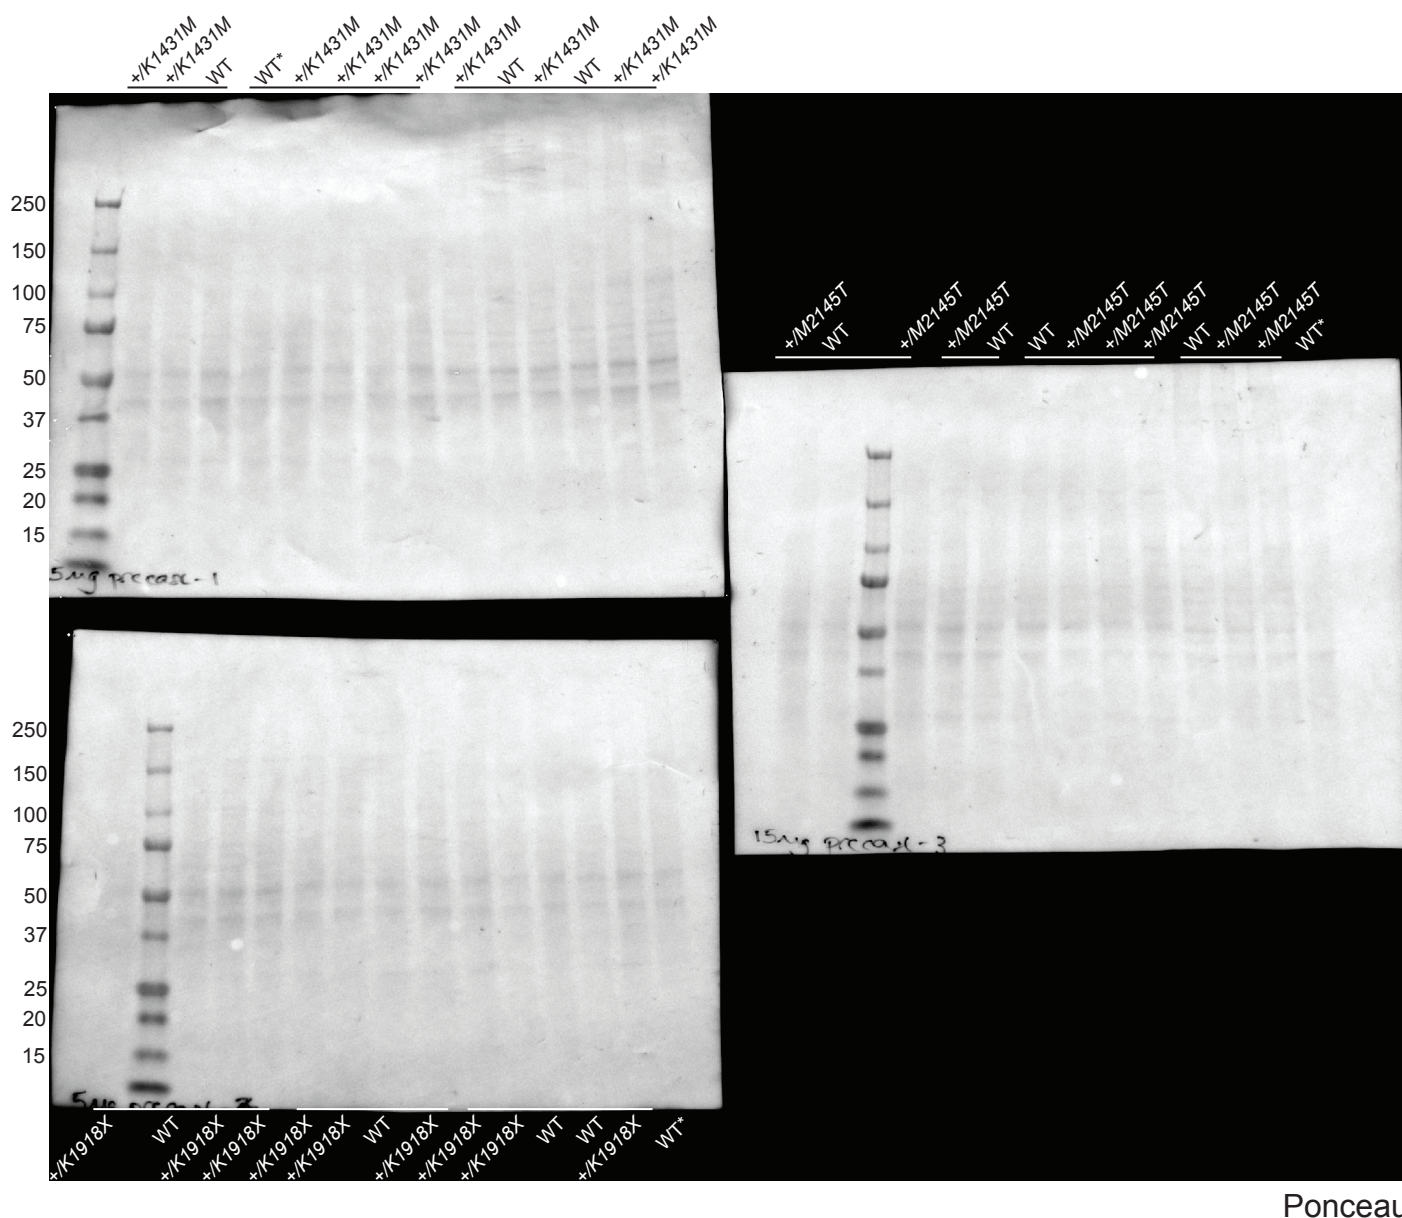

5 μg cortical crude synaptosome preps from P39-P42 mice were separated by gel electrophoresis and stained by Ponceau S prior to immunoblotting. WT\* indicates internal loading control. Lines denote littermates. Stained membranes were cut prior to blotting. Note: these membranes were used for normalization of Western blots (Stx1a) but were not shown in final figures.



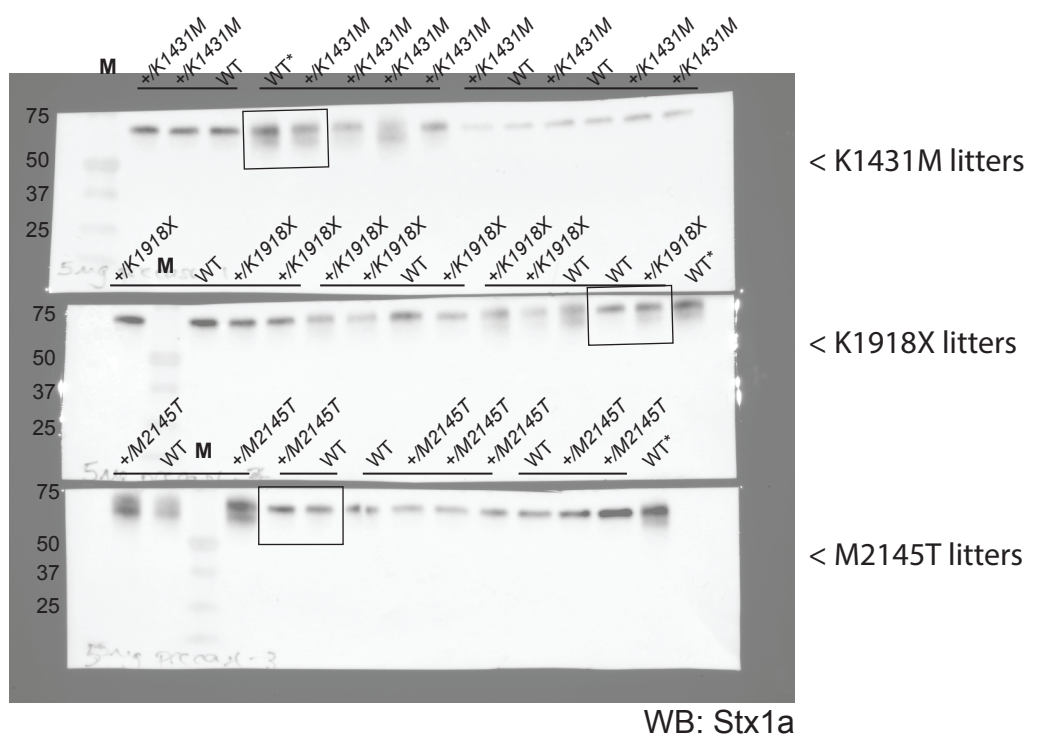

5  $\mu$ g cortical crude synaptosome preps from P39-P42 mice were separated by gel electrophoresis and immunoblotted for syntaxin1a (Stx1a). WT\* indicates internal loading control. Lines denote littermates. Boxes indicate cropped images used in final figure. M: Bio-Rad Protein Plus All Blue Protein Standard.
