# Supplementary material for: Heterozygosity for neurodevelopmental disorder-associated TRIO variants yields distinct deficits in behavior, neuronal development, and synaptic transmission in mice
Source: eLife. 2025 Jun 9;13:RP103620. doi: 10.7554/eLife.103620 (PMC12148328; doi:10.7554/eLife.103620)
Supplement: Figure 7—source data 1. [file elife-103620-fig7-data1.xls]

## Sheet: WT over K1431M cortex
NAME	GS DETAILS	SIZE	ES	NES	NOM p-val	FDR q-val	FWER p-val	RANK AT MAX	LEADING EDGE	NES (Mut/WT)
REACTOME_RAB_GEFS_EXCHANGE_GTP_FOR_GDP_ON_RABS	Details ...	49	0.608176	2.07474	0	0.0421423	0.04	1826	tags=49%, list=23%, signal=64%	-2.07474
KEGG_NOD_LIKE_RECEPTOR_SIGNALING_PATHWAY	Details ...	19	0.685185	1.91519	0.00398406	0.310336	0.451	1122	tags=47%, list=14%, signal=55%	-1.91519
WP_NANOPARTICLE_TRIGGERED_AUTOPHAGIC_CELL_DEATH	Details ...	17	0.706662	1.90247	0	0.24901	0.507	1376	tags=47%, list=18%, signal=57%	-1.90247
REACTOME_RAB_REGULATION_OF_TRAFFICKING	Details ...	73	0.509327	1.8792	0	0.253675	0.622	1342	tags=34%, list=17%, signal=41%	-1.8792
PID_THROMBIN_PAR1_PATHWAY	Details ...	24	0.636959	1.8712	0	0.227363	0.672	2002	tags=71%, list=26%, signal=95%	-1.8712
REACTOME_MAP2K_AND_MAPK_ACTIVATION	Details ...	24	0.637104	1.85966	0.00197239	0.216962	0.719	1421	tags=42%, list=18%, signal=51%	-1.85966
WP_GLYCOGEN_SYNTHESIS_AND_DEGRADATION	Details ...	22	0.638107	1.85487	0.0020284	0.198147	0.741	2384	tags=77%, list=31%, signal=111%	-1.85487
WP_SYNAPTIC_VESICLE_PATHWAY	Details ...	34	0.582693	1.84719	0.004	0.191174	0.775	1839	tags=47%, list=24%, signal=61%	-1.84719
ELLWOOD_MYC_TARGETS_DN	Details ...	25	0.62541	1.84575	0.00383877	0.173216	0.784	803	tags=24%, list=10%, signal=27%	-1.84575
WP_PHOTODYNAMIC_THERAPYINDUCED_AP1_SURVIVAL_SIGNALING	Details ...	16	0.70596	1.84399	0.00206612	0.15895	0.789	1167	tags=56%, list=15%, signal=66%	-1.84399
REACTOME_SIGNALING_BY_MODERATE_KINASE_ACTIVITY_BRAF_MUTANTS	Details ...	24	0.647577	1.84256	0.0019084	0.147644	0.795	1421	tags=46%, list=18%, signal=56%	-1.84256
REACTOME_MAPK_FAMILY_SIGNALING_CASCADES	Details ...	159	0.450937	1.84119	0	0.138324	0.802	1896	tags=40%, list=24%, signal=51%	-1.84119
WP_FIBRIN_COMPLEMENT_RECEPTOR_3_SIGNALING_PATHWAY	Details ...	24	0.616905	1.80166	0	0.207196	0.935	595	tags=38%, list=8%, signal=40%	-1.80166
KEGG_APOPTOSIS	Details ...	46	0.52556	1.79637	0	0.205927	0.946	1026	tags=37%, list=13%, signal=42%	-1.79637
PID_ARF_3PATHWAY	Details ...	15	0.678142	1.78429	0	0.222606	0.961	1073	tags=40%, list=14%, signal=46%	-1.78429
REACTOME_PHASE_II_CONJUGATION_OF_COMPOUNDS	Details ...	43	0.528281	1.77944	0	0.222899	0.965	1142	tags=28%, list=15%, signal=33%	-1.77944
PID_ANGIOPOIETIN_RECEPTOR_PATHWAY	Details ...	26	0.592551	1.77493	0.00184502	0.219748	0.97	2016	tags=46%, list=26%, signal=62%	-1.77493
REACTOME_DISEASES_ASSOCIATED_WITH_GLYCOSAMINOGLYCAN_METABOLISM	Details ...	23	0.605371	1.77245	0.00377358	0.214046	0.972	1067	tags=48%, list=14%, signal=55%	-1.77245
CHESLER_BRAIN_HIGHEST_EXPRESSION	Details ...	25	0.600585	1.74737	0.0040404	0.270054	0.992	777	tags=40%, list=10%, signal=44%	-1.74737
MORI_IMMATURE_B_LYMPHOCYTE_UP	Details ...	22	0.592255	1.74394	0.00402414	0.266262	0.993	526	tags=18%, list=7%, signal=19%	-1.74394
REACTOME_PLASMA_LIPOPROTEIN_CLEARANCE		19	0.6204	1.72754	0.00984252	0.298735	0.997	1958	tags=58%, list=25%, signal=77%	-1.72754
REACTOME_RAF_ACTIVATION		17	0.63632	1.7097	0.0151229	0.340871	0.999	1324	tags=41%, list=17%, signal=49%	-1.7097
KEGG_REGULATION_OF_AUTOPHAGY		15	0.656896	1.70805	0.0157171	0.331331	0.999	956	tags=40%, list=12%, signal=45%	-1.70805
ROSS_AML_WITH_CBFB_MYH11_FUSION		20	0.59861	1.70306	0.0120482	0.335086	0.999	1458	tags=50%, list=19%, signal=61%	-1.70306
WP_TCELL_ACTIVATION_SARSCOV2		34	0.527815	1.7002	0.0040568	0.330837	1	1300	tags=32%, list=17%, signal=39%	-1.7002
REACTOME_NUCLEOTIDE_BINDING_DOMAIN_LEUCINE_RICH_REPEAT_CONTAINING_RECEPTOR_NLR_SIGNALING_PATHWAYS		28	0.551209	1.6983	0.00393701	0.323411	1	1225	tags=39%, list=16%, signal=46%	-1.6983
NAKAMURA_TUMOR_ZONE_PERIPHERAL_VS_CENTRAL_UP		138	0.41527	1.69825	0	0.31159	1	1170	tags=25%, list=15%, signal=29%	-1.69825
PID_IL8_CXCR2_PATHWAY		18	0.610799	1.69736	0.00772201	0.303471	1	2185	tags=72%, list=28%, signal=100%	-1.69736
WP_NEURODEGENERATION_WITH_BRAIN_IRON_ACCUMULATION_NBIA_SUBTYPES_PATHWAY		39	0.525223	1.69154	0.00378072	0.310586	1	1574	tags=41%, list=20%, signal=51%	-1.69154
REACTOME_UPTAKE_AND_ACTIONS_OF_BACTERIAL_TOXINS		17	0.629064	1.69001	0.0114943	0.304662	1	1777	tags=53%, list=23%, signal=68%	-1.69001
PID_EPHB_FWD_PATHWAY		22	0.589645	1.68835	0.00782779	0.299363	1	1896	tags=41%, list=24%, signal=54%	-1.68835
KEGG_PHOSPHATIDYLINOSITOL_SIGNALING_SYSTEM		49	0.489821	1.68734	0.00576923	0.292642	1	1964	tags=43%, list=25%, signal=57%	-1.68734
PID_IL8_CXCR1_PATHWAY		16	0.640924	1.68517	0.00978474	0.290629	1	2185	tags=75%, list=28%, signal=104%	-1.68517
REACTOME_GAP_JUNCTION_TRAFFICKING_AND_REGULATION		16	0.642005	1.67941	0.0160643	0.297513	1	1082	tags=38%, list=14%, signal=43%	-1.67941
REACTOME_RAB_GERANYLGERANYLATION		21	0.597658	1.67514	0.0119284	0.302078	1	1284	tags=43%, list=16%, signal=51%	-1.67514
GRAHAM_NORMAL_QUIESCENT_VS_NORMAL_DIVIDING_UP		19	0.59925	1.67399	0.0114286	0.296781	1	1571	tags=42%, list=20%, signal=53%	-1.67399
SIG_REGULATION_OF_THE_ACTIN_CYTOSKELETON_BY_RHO_GTPASES		18	0.603303	1.67367	0.00817996	0.29001	1	2796	tags=72%, list=36%, signal=112%	-1.67367
REACTOME_TNF_SIGNALING		29	0.536752	1.67202	0.0125261	0.286985	1	1026	tags=38%, list=13%, signal=44%	-1.67202
WP_AUTOPHAGY		26	0.556322	1.66987	0.00998004	0.285739	1	1376	tags=35%, list=18%, signal=42%	-1.66987
GAUSSMANN_MLL_AF4_FUSION_TARGETS_D_UP		16	0.626522	1.66901	0.00623701	0.280836	1	1418	tags=38%, list=18%, signal=46%	-1.66901
REACTOME_NEGATIVE_REGULATION_OF_THE_PI3K_AKT_NETWORK		47	0.489193	1.66854	0.00191571	0.275271	1	890	tags=23%, list=11%, signal=26%	-1.66854
ROSS_LEUKEMIA_WITH_MLL_FUSIONS		46	0.487473	1.66739	0.0078125	0.271911	1	1493	tags=33%, list=19%, signal=40%	-1.66739
WP_TARGET_OF_RAPAMYCIN_SIGNALING		23	0.56946	1.66562	0.00793651	0.269582	1	1814	tags=43%, list=23%, signal=56%	-1.66562
BIOCARTA_PROTEASOME_PATHWAY		18	0.611336	1.65907	0.0104822	0.279243	1	1677	tags=61%, list=22%, signal=78%	-1.65907
REACTOME_FORMATION_OF_FIBRIN_CLOT_CLOTTING_CASCADE		15	0.626931	1.6549	0.0141129	0.284134	1	667	tags=40%, list=9%, signal=44%	-1.6549
TAVOR_CEBPA_TARGETS_UP		20	0.592603	1.65332	0.0177165	0.282249	1	875	tags=30%, list=11%, signal=34%	-1.65332
REACTOME_HSP90_CHAPERONE_CYCLE_FOR_STEROID_HORMONE_RECEPTORS_SHR_IN_THE_PRESENCE_OF_LIGAND		26	0.560558	1.64573	0.010101	0.296105	1	1082	tags=31%, list=14%, signal=36%	-1.64573
REACTOME_NOD1_2_SIGNALING_PATHWAY		17	0.604531	1.64321	0.0155945	0.297001	1	1225	tags=47%, list=16%, signal=56%	-1.64321
NABA_MATRISOME		233	0.371082	1.64248	0	0.292939	1	1079	tags=24%, list=14%, signal=27%	-1.64248
REACTOME_BIOLOGICAL_OXIDATIONS		82	0.433865	1.64138	0.00414938	0.290219	1	1647	tags=30%, list=21%, signal=38%	-1.64138
BIOCARTA_BIOPEPTIDES_PATHWAY		16	0.621169	1.63646	0.0162933	0.298894	1	1888	tags=50%, list=24%, signal=66%	-1.63646
WP_TLR4_SIGNALING_AND_TOLERANCE		17	0.612496	1.63288	0.0195312	0.302683	1	1026	tags=47%, list=13%, signal=54%	-1.63288
KEGG_GLYCOLYSIS_GLUCONEOGENESIS		31	0.520587	1.62055	0.00753296	0.331736	1	2625	tags=55%, list=34%, signal=82%	-1.62055
PID_SYNDECAN_4_PATHWAY		17	0.605211	1.61801	0.0203252	0.333086	1	1896	tags=53%, list=24%, signal=70%	-1.61801
REACTOME_PI_METABOLISM		56	0.454942	1.61468	0.0040404	0.336736	1	1283	tags=27%, list=16%, signal=32%	-1.61468
PLASARI_TGFB1_TARGETS_10HR_UP		71	0.436223	1.61312	0.00775194	0.334747	1	846	tags=24%, list=11%, signal=27%	-1.61312
KESHELAVA_MULTIPLE_DRUG_RESISTANCE		39	0.487838	1.60809	0.00598802	0.344299	1	1045	tags=33%, list=13%, signal=38%	-1.60809
LEIN_OLIGODENDROCYTE_MARKERS		51	0.455141	1.60787	0.0134875	0.338996	1	2170	tags=47%, list=28%, signal=65%	-1.60787
REACTOME_REGULATION_OF_TNFR1_SIGNALING		21	0.557353	1.6078	0.0193424	0.333411	1	1026	tags=38%, list=13%, signal=44%	-1.6078
REACTOME_GLUTAMATE_NEUROTRANSMITTER_RELEASE_CYCLE		15	0.622918	1.60593	0.020202	0.333444	1	1691	tags=40%, list=22%, signal=51%	-1.60593
REACTOME_TNFR1_INDUCED_NFKAPPAB_SIGNALING_PATHWAY		17	0.591318	1.60553	0.0228571	0.329155	1	1026	tags=47%, list=13%, signal=54%	-1.60553
WP_TCELL_ANTIGEN_RECEPTOR_TCR_PATHWAY_DURING_STAPHYLOCOCCUS_AUREUS_INFECTION		23	0.548907	1.60035	0.0162602	0.339033	1	2016	tags=52%, list=26%, signal=70%	-1.60035
WP_KISSPEPTINKISSPEPTIN_RECEPTOR_SYSTEM_IN_THE_OVARY		17	0.584819	1.59584	0.0311891	0.346983	1	2016	tags=53%, list=26%, signal=71%	-1.59584
REACTOME_SIGNALING_BY_WNT_IN_CANCER		16	0.602443	1.59404	0.0231214	0.346483	1	2027	tags=63%, list=26%, signal=84%	-1.59404
CAIRO_LIVER_DEVELOPMENT_DN		109	0.404913	1.59101	0.00189394	0.349528	1	1303	tags=31%, list=17%, signal=37%	-1.59101
WU_CELL_MIGRATION		60	0.446813	1.59064	0.0021097	0.345207	1	1487	tags=32%, list=19%, signal=39%	-1.59064
BIOCARTA_AT1R_PATHWAY		15	0.606927	1.58468	0.0161616	0.358298	1	1616	tags=33%, list=21%, signal=42%	-1.58468
WP_MICRORNAS_IN_CARDIOMYOCYTE_HYPERTROPHY		46	0.464491	1.58379	0.0060241	0.355587	1	2016	tags=50%, list=26%, signal=67%	-1.58379
REACTOME_MHC_CLASS_II_ANTIGEN_PRESENTATION		56	0.445087	1.57554	0.00790514	0.376085	1	1212	tags=29%, list=16%, signal=34%	-1.57554
ELVIDGE_HIF1A_AND_HIF2A_TARGETS_UP		26	0.52491	1.57483	0.0205224	0.373026	1	1522	tags=46%, list=20%, signal=57%	-1.57483
SPIRA_SMOKERS_LUNG_CANCER_UP		20	0.554386	1.57065	0.0283554	0.380754	1	1788	tags=45%, list=23%, signal=58%	-1.57065
KEGG_VIBRIO_CHOLERAE_INFECTION		28	0.514118	1.57029	0.0332681	0.376447	1	1888	tags=50%, list=24%, signal=66%	-1.57029
KEGG_STARCH_AND_SUCROSE_METABOLISM		17	0.583815	1.56993	0.0352251	0.372432	1	1210	tags=47%, list=16%, signal=56%	-1.56993
KEGG_TOLL_LIKE_RECEPTOR_SIGNALING_PATHWAY		37	0.482867	1.56895	0.00385356	0.370163	1	1167	tags=32%, list=15%, signal=38%	-1.56895
REACTOME_HSF1_ACTIVATION		16	0.595207	1.56791	0.0314342	0.368499	1	1957	tags=63%, list=25%, signal=83%	-1.56791
KEGG_GLYCEROPHOSPHOLIPID_METABOLISM		47	0.458545	1.56014	0.0111111	0.387686	1	1847	tags=40%, list=24%, signal=53%	-1.56014
WP_GLYCOLYSIS_AND_GLUCONEOGENESIS		22	0.544896	1.55943	0.0287908	0.384694	1	1019	tags=27%, list=13%, signal=31%	-1.55943
WP_TRANSSULFURATION_ONECARBON_METABOLISM_AND_RELATED_PATHWAYS		40	0.473818	1.55826	0.011583	0.383298	1	1698	tags=43%, list=22%, signal=54%	-1.55826
BANDRES_RESPONSE_TO_CARMUSTIN_MGMT_24HR_DN		18	0.565477	1.55273	0.0345528	0.395751	1	1317	tags=33%, list=17%, signal=40%	-1.55273
PID_IL1_PATHWAY		21	0.540962	1.54933	0.0361446	0.401897	1	1016	tags=43%, list=13%, signal=49%	-1.54933
REACTOME_SEMAPHORIN_INTERACTIONS		37	0.474002	1.54872	0.0181087	0.399004	1	2264	tags=41%, list=29%, signal=57%	-1.54872
NABA_SECRETED_FACTORS		31	0.500006	1.54676	0.00595238	0.400027	1	641	tags=32%, list=8%, signal=35%	-1.54676
WP_MIRNAS_INVOLVEMENT_IN_THE_IMMUNE_RESPONSE_IN_SEPSIS		17	0.567521	1.54363	0.0341365	0.40474	1	1122	tags=47%, list=14%, signal=55%	-1.54363
REACTOME_SIGNALLING_TO_ERKS		21	0.544557	1.54162	0.0252427	0.406516	1	1389	tags=33%, list=18%, signal=40%	-1.54162
MOOTHA_GLUCONEOGENESIS		16	0.581747	1.54052	0.0324427	0.405113	1	1466	tags=44%, list=19%, signal=54%	-1.54052
REACTOME_SYNTHESIS_OF_PIPS_AT_THE_PLASMA_MEMBRANE		33	0.479064	1.54034	0.0295276	0.400928	1	799	tags=24%, list=10%, signal=27%	-1.54034
WP_ONECARBON_METABOLISM_AND_RELATED_PATHWAYS		30	0.484618	1.54005	0.0358566	0.397349	1	1979	tags=57%, list=25%, signal=76%	-1.54005
BARRIER_COLON_CANCER_RECURRENCE_UP		26	0.520411	1.53971	0.024	0.393929	1	1716	tags=46%, list=22%, signal=59%	-1.53971
HERNANDEZ_ABERRANT_MITOSIS_BY_DOCETACEL_2NM_UP		27	0.511043	1.53831	0.0225989	0.394055	1	960	tags=33%, list=12%, signal=38%	-1.53831
KEGG_FRUCTOSE_AND_MANNOSE_METABOLISM		20	0.545686	1.53821	0.0393375	0.389933	1	827	tags=30%, list=11%, signal=33%	-1.53821
BURTON_ADIPOGENESIS_10		20	0.536941	1.53436	0.0354331	0.396838	1	1538	tags=40%, list=20%, signal=50%	-1.53436
SASAKI_ADULT_T_CELL_LEUKEMIA		76	0.40986	1.53195	0.012987	0.40028	1	1018	tags=21%, list=13%, signal=24%	-1.53195
NABA_MATRISOME_ASSOCIATED		143	0.371279	1.53073	0	0.399583	1	890	tags=22%, list=11%, signal=25%	-1.53073
TAKEDA_TARGETS_OF_NUP98_HOXA9_FUSION_10D_DN		50	0.443287	1.53045	0.0189873	0.396083	1	1495	tags=34%, list=19%, signal=42%	-1.53045
HOFFMANN_IMMATURE_TO_MATURE_B_LYMPHOCYTE_UP		16	0.583425	1.52962	0.0233918	0.394472	1	948	tags=44%, list=12%, signal=50%	-1.52962
BIOCARTA_MET_PATHWAY		23	0.518753	1.52756	0.0253906	0.396692	1	1680	tags=26%, list=22%, signal=33%	-1.52756
REACTOME_HSF1_DEPENDENT_TRANSACTIVATION		17	0.562994	1.52602	0.0346939	0.397608	1	1837	tags=53%, list=24%, signal=69%	-1.52602
REACTOME_TAK1_DEPENDENT_IKK_AND_NF_KAPPA_B_ACTIVATION		22	0.52497	1.52529	0.0271318	0.395919	1	1016	tags=41%, list=13%, signal=47%	-1.52529
PIONTEK_PKD1_TARGETS_UP		15	0.585499	1.51789	0.0373281	0.41486	1	1515	tags=40%, list=19%, signal=50%	-1.51789
GAUSSMANN_MLL_AF4_FUSION_TARGETS_E_UP		44	0.450317	1.51652	0.0200803	0.415344	1	1406	tags=34%, list=18%, signal=41%	-1.51652
WP_IL1_SIGNALING_PATHWAY		33	0.475362	1.51502	0.0116279	0.415877	1	1167	tags=39%, list=15%, signal=46%	-1.51502
SIG_CD40PATHWAYMAP		18	0.553388	1.515	0.0404624	0.411883	1	2154	tags=56%, list=28%, signal=77%	-1.515
WP_TOLLLIKE_RECEPTOR_SIGNALING_PATHWAY		38	0.469686	1.51388	0.0323232	0.411039	1	1167	tags=32%, list=15%, signal=37%	-1.51388
WP_HOSTPATHOGEN_INTERACTION_OF_HUMAN_CORONAVIRUSES_AUTOPHAGY		17	0.558033	1.51357	0.0392927	0.408007	1	1291	tags=35%, list=17%, signal=42%	-1.51357
PID_FAS_PATHWAY		26	0.51136	1.5112	0.0220884	0.41144	1	1122	tags=35%, list=14%, signal=40%	-1.5112
NABA_CORE_MATRISOME		90	0.390367	1.50887	0.00195695	0.41505	1	1504	tags=29%, list=19%, signal=35%	-1.50887
REACTOME_AMINO_ACIDS_REGULATE_MTORC1		37	0.467005	1.5079	0.0278884	0.414337	1	858	tags=30%, list=11%, signal=33%	-1.5079
REACTOME_ONCOGENIC_MAPK_SIGNALING		46	0.453825	1.50722	0.0229885	0.412451	1	1441	tags=39%, list=18%, signal=48%	-1.50722
KEGG_OOCYTE_MEIOSIS		44	0.434535	1.5027	0.0264151	0.422894	1	1448	tags=34%, list=19%, signal=42%	-1.5027
CHIANG_LIVER_CANCER_SUBCLASS_CTNNB1_DN		56	0.421985	1.49884	0.0189474	0.43126	1	977	tags=30%, list=13%, signal=34%	-1.49884
KEGG_COMPLEMENT_AND_COAGULATION_CASCADES		25	0.505579	1.49428	0.0494071	0.442235	1	1303	tags=36%, list=17%, signal=43%	-1.49428
REACTOME_ROS_AND_RNS_PRODUCTION_IN_PHAGOCYTES		16	0.558171	1.49272	0.0441177	0.443461	1	2002	tags=56%, list=26%, signal=76%	-1.49272
REACTOME_GLUTATHIONE_CONJUGATION		20	0.530723	1.49228	0.04	0.441187	1	1642	tags=40%, list=21%, signal=51%	-1.49228
WILLIAMS_ESR2_TARGETS_UP		15	0.569788	1.48983	0.0403226	0.445699	1	1739	tags=40%, list=22%, signal=51%	-1.48983
REACTOME_MEMBRANE_TRAFFICKING		390	0.323834	1.48726	0	0.449585	1	1229	tags=22%, list=16%, signal=25%	-1.48726
KEGG_EPITHELIAL_CELL_SIGNALING_IN_HELICOBACTER_PYLORI_INFECTION		41	0.448072	1.48556	0.0291262	0.451408	1	2016	tags=44%, list=26%, signal=59%	-1.48556
REACTOME_CARGO_RECOGNITION_FOR_CLATHRIN_MEDIATED_ENDOCYTOSIS		62	0.407297	1.48253	0.0188324	0.457463	1	2088	tags=45%, list=27%, signal=61%	-1.48253
PID_RAC1_PATHWAY		31	0.483297	1.48172	0.0416667	0.456315	1	2510	tags=65%, list=32%, signal=95%	-1.48172
ALONSO_METASTASIS_EMT_UP		19	0.534742	1.47629	0.0531496	0.471203	1	1341	tags=47%, list=17%, signal=57%	-1.47629
GAZDA_DIAMOND_BLACKFAN_ANEMIA_MYELOID_UP		15	0.550177	1.47378	0.0529532	0.475967	1	903	tags=20%, list=12%, signal=23%	-1.47378
REACTOME_NEGATIVE_REGULATION_OF_MAPK_PATHWAY		16	0.557493	1.47249	0.0623742	0.476122	1	1345	tags=38%, list=17%, signal=45%	-1.47249
WP_PROXIMAL_TUBULE_TRANSPORT		21	0.51959	1.47229	0.0617761	0.472824	1	1089	tags=33%, list=14%, signal=39%	-1.47229
REACTOME_CLATHRIN_MEDIATED_ENDOCYTOSIS		94	0.376999	1.47191	0.00956023	0.470222	1	2269	tags=47%, list=29%, signal=65%	-1.47191
FRIDMAN_SENESCENCE_UP		38	0.444966	1.46632	0.0323232	0.485721	1	1209	tags=32%, list=16%, signal=37%	-1.46632
REACTOME_VESICLE_MEDIATED_TRANSPORT		407	0.315192	1.46603	0	0.482879	1	1233	tags=22%, list=16%, signal=24%	-1.46603
WP_RAC1PAK1P38MMP2_PATHWAY		38	0.450881	1.46553	0.0243446	0.480692	1	2016	tags=37%, list=26%, signal=49%	-1.46553
REACTOME_SIGNALING_BY_WNT		144	0.356105	1.46237	0.0132576	0.488087	1	2033	tags=42%, list=26%, signal=56%	-1.46237
REACTOME_COOPERATION_OF_PREFOLDIN_AND_TRIC_CCT_IN_ACTIN_AND_TUBULIN_FOLDING		15	0.556917	1.45876	0.0520833	0.496735	1	2391	tags=73%, list=31%, signal=106%	-1.45876
WANG_ADIPOGENIC_GENES_REPRESSED_BY_SIRT1		18	0.531111	1.45849	0.0618763	0.493865	1	1418	tags=33%, list=18%, signal=41%	-1.45849
PID_VEGFR1_PATHWAY		18	0.53561	1.45809	0.0539499	0.491511	1	2185	tags=67%, list=28%, signal=92%	-1.45809
BIOCARTA_RACCYCD_PATHWAY		15	0.56027	1.45762	0.0645161	0.489383	1	2526	tags=60%, list=32%, signal=89%	-1.45762
REACTOME_PHOSPHOLIPID_METABOLISM		129	0.362837	1.45665	0.00773694	0.488803	1	1595	tags=28%, list=20%, signal=35%	-1.45665
WP_CLOCKCONTROLLED_AUTOPHAGY_IN_BONE_METABOLISM		41	0.44129	1.45572	0.0465587	0.488362	1	956	tags=20%, list=12%, signal=22%	-1.45572
BUFFA_HYPOXIA_METAGENE		31	0.462971	1.45472	0.0579151	0.488127	1	1651	tags=45%, list=21%, signal=57%	-1.45472
KAAB_FAILED_HEART_ATRIUM_DN		95	0.377012	1.45362	0.00773694	0.488393	1	1702	tags=32%, list=22%, signal=40%	-1.45362
SLEBOS_HEAD_AND_NECK_CANCER_WITH_HPV_UP		27	0.483909	1.45317	0.0396825	0.486453	1	926	tags=26%, list=12%, signal=29%	-1.45317
REACTOME_RECOGNITION_OF_DNA_DAMAGE_BY_PCNA_CONTAINING_REPLICATION_COMPLEX		16	0.540436	1.45059	0.0623701	0.491802	1	953	tags=31%, list=12%, signal=36%	-1.45059
REACTOME_SIGNALING_BY_ALK		17	0.52863	1.45007	0.068	0.490048	1	1888	tags=41%, list=24%, signal=54%	-1.45007
TSENG_ADIPOGENIC_POTENTIAL_DN		30	0.466495	1.44911	0.0512334	0.489754	1	167	tags=17%, list=2%, signal=17%	-1.44911
SARRIO_EPITHELIAL_MESENCHYMAL_TRANSITION_UP		58	0.405217	1.44485	0.0320755	0.5008	1	1170	tags=28%, list=15%, signal=32%	-1.44485
KEGG_CYSTEINE_AND_METHIONINE_METABOLISM		19	0.511964	1.44195	0.0704501	0.507015	1	1028	tags=32%, list=13%, signal=36%	-1.44195
BIOCARTA_NFAT_PATHWAY		21	0.498568	1.43832	0.058	0.516489	1	1122	tags=33%, list=14%, signal=39%	-1.43832
PID_TNF_PATHWAY		34	0.457319	1.43639	0.0490798	0.51982	1	1026	tags=29%, list=13%, signal=34%	-1.43639
WOOD_EBV_EBNA1_TARGETS_DN		27	0.470827	1.43454	0.0557769	0.523401	1	1263	tags=26%, list=16%, signal=31%	-1.43454
REACTOME_EPH_EPHRIN_SIGNALING		54	0.409239	1.43443	0.0338645	0.520111	1	1896	tags=35%, list=24%, signal=46%	-1.43443
WP_3Q29_COPY_NUMBER_VARIATION_SYNDROME		22	0.497489	1.4311	0.0492126	0.528672	1	1493	tags=45%, list=19%, signal=56%	-1.4311
PID_EPHRINB_REV_PATHWAY		18	0.523197	1.43082	0.074364	0.526149	1	1680	tags=50%, list=22%, signal=64%	-1.43082
REN_ALVEOLAR_RHABDOMYOSARCOMA_DN		247	0.324632	1.43028	0.00400802	0.524552	1	1359	tags=24%, list=17%, signal=28%	-1.43028
REACTOME_TRANSLOCATION_OF_SLC2A4_GLUT4_TO_THE_PLASMA_MEMBRANE		31	0.452837	1.42841	0.0683594	0.528114	1	1259	tags=26%, list=16%, signal=31%	-1.42841
WP_FOLATE_METABOLISM		33	0.454503	1.42811	0.0444444	0.525773	1	1126	tags=33%, list=14%, signal=39%	-1.42811
REACTOME_AUTOPHAGY		101	0.3653	1.42317	0.019305	0.540578	1	1844	tags=35%, list=24%, signal=45%	-1.42317
PID_IL6_7_PATHWAY		22	0.493909	1.4227	0.07	0.53868	1	1751	tags=45%, list=22%, signal=58%	-1.4227
HESS_TARGETS_OF_HOXA9_AND_MEIS1_DN		30	0.451775	1.42267	0.0616016	0.535255	1	1179	tags=40%, list=15%, signal=47%	-1.42267
WP_TNFALPHA_SIGNALING_PATHWAY		50	0.406217	1.42141	0.035514	0.536505	1	1255	tags=30%, list=16%, signal=36%	-1.42141
LIU_SOX4_TARGETS_UP		73	0.383124	1.41909	0.022541	0.541745	1	1550	tags=37%, list=20%, signal=46%	-1.41909
REACTOME_GAMMA_CARBOXYLATION_HYPUSINE_FORMATION_AND_ARYLSULFATASE_ACTIVATION		19	0.517704	1.41727	0.072407	0.544932	1	561	tags=26%, list=7%, signal=28%	-1.41727
PID_FAK_PATHWAY		36	0.449319	1.41591	0.0515464	0.546688	1	1896	tags=36%, list=24%, signal=47%	-1.41591
LEE_AGING_CEREBELLUM_DN		30	0.457246	1.41528	0.0468165	0.545379	1	1729	tags=43%, list=22%, signal=55%	-1.41528
REACTOME_INTERLEUKIN_17_SIGNALING		31	0.452343	1.41522	0.0445344	0.542102	1	1324	tags=42%, list=17%, signal=50%	-1.41522
REACTOME_EPHB_MEDIATED_FORWARD_SIGNALING		30	0.453796	1.41517	0.0556622	0.538977	1	2269	tags=43%, list=29%, signal=61%	-1.41517
YAMASHITA_LIVER_CANCER_STEM_CELL_DN		26	0.475792	1.41487	0.0555556	0.536584	1	1227	tags=31%, list=16%, signal=36%	-1.41487
ZWANG_EGF_INTERVAL_UP		23	0.487332	1.41459	0.0738523	0.534354	1	461	tags=22%, list=6%, signal=23%	-1.41459
REACTOME_SIGNALING_BY_FGFR4		19	0.519836	1.41447	0.07	0.531552	1	2040	tags=42%, list=26%, signal=57%	-1.41447
REACTOME_INTERCONVERSION_OF_NUCLEOTIDE_DI_AND_TRIPHOSPHATES		18	0.519711	1.41411	0.0738523	0.529655	1	1804	tags=44%, list=23%, signal=58%	-1.41411
LEIN_MIDBRAIN_MARKERS		38	0.432574	1.41405	0.0534351	0.526693	1	1294	tags=32%, list=17%, signal=38%	-1.41405
SAMOLS_TARGETS_OF_KHSV_MIRNAS_DN		25	0.482068	1.41375	0.0703934	0.52458	1	832	tags=32%, list=11%, signal=36%	-1.41375
BAKKER_FOXO3_TARGETS_UP		27	0.469919	1.41172	0.0540541	0.52838	1	1584	tags=52%, list=20%, signal=65%	-1.41172
KEGG_ARGININE_AND_PROLINE_METABOLISM		34	0.438263	1.41116	0.0581395	0.527323	1	2326	tags=50%, list=30%, signal=71%	-1.41116
BLANCO_MELO_COVID19_SARS_COV_2_INFECTION_A594_ACE2_EXPRESSING_CELLS_RUXOLITINIB_DN		36	0.431572	1.41085	0.0601942	0.525416	1	1203	tags=22%, list=15%, signal=26%	-1.41085
PID_SYNDECAN_2_PATHWAY		20	0.512184	1.41036	0.0888889	0.524013	1	1751	tags=40%, list=22%, signal=51%	-1.41036
REACTOME_EARLY_SARS_COV_2_INFECTION_EVENTS		27	0.469573	1.40997	0.085595	0.52226	1	1802	tags=44%, list=23%, signal=58%	-1.40997
KEGG_CYTOKINE_CYTOKINE_RECEPTOR_INTERACTION		24	0.477647	1.40944	0.0621359	0.520994	1	1991	tags=46%, list=26%, signal=61%	-1.40944
IWANAGA_CARCINOGENESIS_BY_KRAS_DN		54	0.403355	1.4089	0.0454545	0.519597	1	987	tags=24%, list=13%, signal=27%	-1.4089
ANDERSEN_CHOLANGIOCARCINOMA_CLASS2		32	0.447969	1.40882	0.0591837	0.516921	1	1207	tags=38%, list=15%, signal=44%	-1.40882
PEART_HDAC_PROLIFERATION_CLUSTER_UP		21	0.497974	1.40795	0.0770791	0.516919	1	1395	tags=38%, list=18%, signal=46%	-1.40795
WP_G13_SIGNALING_PATHWAY		23	0.4897	1.40601	0.0707269	0.520722	1	2792	tags=61%, list=36%, signal=95%	-1.40601
SABATES_COLORECTAL_ADENOMA_UP		28	0.471181	1.40419	0.0708661	0.523948	1	919	tags=25%, list=12%, signal=28%	-1.40419
WP_PROSTAGLANDIN_SYNTHESIS_AND_REGULATION		19	0.508281	1.40387	0.0721063	0.522094	1	2749	tags=58%, list=35%, signal=89%	-1.40387
REACTOME_PLATELET_AGGREGATION_PLUG_FORMATION		24	0.482875	1.40353	0.0766208	0.520426	1	713	tags=29%, list=9%, signal=32%	-1.40353
WP_REGULATORY_CIRCUITS_OF_THE_STAT3_SIGNALING_PATHWAY		30	0.450863	1.40334	0.068	0.518277	1	1991	tags=40%, list=26%, signal=54%	-1.40334
PID_ER_NONGENOMIC_PATHWAY		19	0.492944	1.40144	0.0752896	0.522095	1	2002	tags=47%, list=26%, signal=64%	-1.40144
REACTOME_DISEASES_OF_IMMUNE_SYSTEM		18	0.510498	1.39961	0.0797665	0.525582	1	529	tags=33%, list=7%, signal=36%	-1.39961
KEGG_INOSITOL_PHOSPHATE_METABOLISM		42	0.423003	1.39898	0.0546875	0.524872	1	2200	tags=40%, list=28%, signal=56%	-1.39898
REACTOME_TOLL_LIKE_RECEPTOR_TLR1_TLR2_CASCADE		57	0.388756	1.39668	0.027027	0.530051	1	1386	tags=37%, list=18%, signal=44%	-1.39668
APRELIKOVA_BRCA1_TARGETS		28	0.465086	1.39402	0.0655106	0.536418	1	794	tags=21%, list=10%, signal=24%	-1.39402
REACTOME_KINESINS		15	0.525539	1.3938	0.0806452	0.534293	1	1082	tags=33%, list=14%, signal=39%	-1.3938
PARENT_MTOR_SIGNALING_UP		334	0.306514	1.39223	0	0.536767	1	1255	tags=22%, list=16%, signal=25%	-1.39223
IGLESIAS_E2F_TARGETS_UP		82	0.365296	1.3913	0.0389344	0.537155	1	1950	tags=38%, list=25%, signal=50%	-1.3913
CHNG_MULTIPLE_MYELOMA_HYPERPLOID_DN		24	0.459009	1.38978	0.0647773	0.539678	1	2365	tags=46%, list=30%, signal=66%	-1.38978
MIKKELSEN_NPC_LCP_WITH_H3K4ME3		29	0.44587	1.38544	0.0934959	0.552266	1	886	tags=24%, list=11%, signal=27%	-1.38544
TSUNODA_CISPLATIN_RESISTANCE_DN		16	0.516841	1.38538	0.11245	0.549596	1	1711	tags=44%, list=22%, signal=56%	-1.38538
WP_FERROPTOSIS		35	0.423403	1.38451	0.0747475	0.549638	1	1723	tags=46%, list=22%, signal=58%	-1.38451
REACTOME_BETA_CATENIN_INDEPENDENT_WNT_SIGNALING		88	0.359703	1.38199	0.032	0.555801	1	1966	tags=41%, list=25%, signal=54%	-1.38199
WP_PHOSPHOINOSITIDES_METABOLISM		35	0.432206	1.38134	0.0622642	0.554999	1	883	tags=23%, list=11%, signal=26%	-1.38134
WP_METABOLIC_REPROGRAMMING_IN_PANCREATIC_CANCER		34	0.434182	1.37748	0.0900196	0.565713	1	1466	tags=35%, list=19%, signal=43%	-1.37748
REACTOME_SIGNALING_BY_INSULIN_RECEPTOR		34	0.436423	1.37744	0.0724346	0.562968	1	1817	tags=35%, list=23%, signal=46%	-1.37744
REACTOME_INTERLEUKIN_1_SIGNALING		76	0.364616	1.37669	0.0346821	0.562845	1	1579	tags=36%, list=20%, signal=44%	-1.37669
KUNINGER_IGF1_VS_PDGFB_TARGETS_DN		15	0.523609	1.37648	0.107943	0.560753	1	1027	tags=33%, list=13%, signal=38%	-1.37648
PID_TRKR_PATHWAY		40	0.421454	1.37593	0.0678295	0.559996	1	303	tags=15%, list=4%, signal=16%	-1.37593
REACTOME_RECYCLING_PATHWAY_OF_L1		18	0.502524	1.37552	0.105058	0.558673	1	1082	tags=44%, list=14%, signal=51%	-1.37552
BREDEMEYER_RAG_SIGNALING_VIA_ATM_NOT_VIA_NFKB_UP		22	0.483288	1.37495	0.0898662	0.55802	1	1021	tags=23%, list=13%, signal=26%	-1.37495
REACTOME_IRON_UPTAKE_AND_TRANSPORT		29	0.45056	1.37416	0.0663984	0.558159	1	1692	tags=41%, list=22%, signal=53%	-1.37416
REACTOME_INOSITOL_PHOSPHATE_METABOLISM		32	0.442152	1.37403	0.0636183	0.555783	1	2200	tags=50%, list=28%, signal=69%	-1.37403
KAAB_FAILED_HEART_VENTRICLE_DN		17	0.514567	1.37338	0.0780287	0.555366	1	1100	tags=29%, list=14%, signal=34%	-1.37338
ROZANOV_MMP14_TARGETS_DN		16	0.527158	1.37261	0.120163	0.555292	1	847	tags=31%, list=11%, signal=35%	-1.37261
LEE_CALORIE_RESTRICTION_MUSCLE_DN		26	0.455387	1.37018	0.0936903	0.561425	1	1090	tags=27%, list=14%, signal=31%	-1.37018
LIM_MAMMARY_LUMINAL_MATURE_UP		38	0.4188	1.37004	0.0708502	0.559148	1	672	tags=21%, list=9%, signal=23%	-1.37004
KEGG_GLUTATHIONE_METABOLISM		29	0.44071	1.36999	0.0717213	0.556657	1	1698	tags=41%, list=22%, signal=53%	-1.36999
REACTOME_RESPONSE_TO_ELEVATED_PLATELET_CYTOSOLIC_CA2		79	0.361944	1.36893	0.0499002	0.55774	1	2309	tags=43%, list=30%, signal=61%	-1.36893
WP_IL17_SIGNALING_PATHWAY		15	0.518613	1.36776	0.103448	0.558906	1	2374	tags=47%, list=30%, signal=67%	-1.36776
BIOCARTA_TCR_PATHWAY		17	0.511254	1.36772	0.0984252	0.556387	1	2016	tags=47%, list=26%, signal=63%	-1.36772
ANDERSEN_LIVER_CANCER_KRT19_DN		32	0.433174	1.36577	0.0957031	0.561005	1	1162	tags=28%, list=15%, signal=33%	-1.36577
KOINUMA_TARGETS_OF_SMAD2_OR_SMAD3		391	0.298604	1.36517	0.00373134	0.560475	1	1646	tags=27%, list=21%, signal=33%	-1.36517
PID_TRAIL_PATHWAY		15	0.512912	1.36509	0.110895	0.558215	1	1167	tags=40%, list=15%, signal=47%	-1.36509
KEGG_ENDOCYTOSIS		106	0.349114	1.36495	0.0376984	0.55608	1	1432	tags=28%, list=18%, signal=34%	-1.36495
BIOCARTA_VEGF_PATHWAY		20	0.4854	1.36493	0.0956175	0.553554	1	2002	tags=50%, list=26%, signal=67%	-1.36493
MCCLUNG_CREB1_TARGETS_UP		58	0.380464	1.36327	0.0680934	0.556626	1	1433	tags=33%, list=18%, signal=40%	-1.36327
REACTOME_AMYLOID_FIBER_FORMATION		27	0.448883	1.36233	0.0843137	0.557359	1	589	tags=19%, list=8%, signal=20%	-1.36233
MIKKELSEN_ES_LCP_WITH_H3K4ME3		33	0.422061	1.35936	0.0833333	0.565462	1	2105	tags=33%, list=27%, signal=45%	-1.35936
PID_CXCR3_PATHWAY		22	0.47268	1.35811	0.0804829	0.567187	1	1814	tags=45%, list=23%, signal=59%	-1.35811
PID_P38_ALPHA_BETA_PATHWAY		16	0.520857	1.35507	0.112266	0.575794	1	1405	tags=38%, list=18%, signal=46%	-1.35507
HSIAO_LIVER_SPECIFIC_GENES		94	0.357625	1.3547	0.0503145	0.574523	1	1343	tags=28%, list=17%, signal=33%	-1.3547
AMIT_EGF_RESPONSE_480_MCF10A		18	0.487229	1.35423	0.111753	0.573606	1	844	tags=22%, list=11%, signal=25%	-1.35423
KEGG_UBIQUITIN_MEDIATED_PROTEOLYSIS		88	0.357185	1.35403	0.0280899	0.571765	1	1357	tags=28%, list=17%, signal=34%	-1.35403
ODONNELL_METASTASIS_UP		22	0.475879	1.35384	0.103516	0.569927	1	481	tags=18%, list=6%, signal=19%	-1.35384
KEGG_RIG_I_LIKE_RECEPTOR_SIGNALING_PATHWAY		32	0.435039	1.35378	0.0885312	0.56761	1	1122	tags=28%, list=14%, signal=33%	-1.35378
WP_INSULIN_SIGNALING		92	0.350514	1.35071	0.054409	0.575766	1	2375	tags=45%, list=30%, signal=63%	-1.35071
WP_RAS_SIGNALING		89	0.353695	1.35047	0.0457875	0.574104	1	1036	tags=21%, list=13%, signal=24%	-1.35047
WP_NOVEL_INTRACELLULAR_COMPONENTS_OF_RIGILIKE_RECEPTOR_PATHWAY		33	0.423401	1.3464	0.0876191	0.58605	1	1122	tags=27%, list=14%, signal=32%	-1.3464
WP_METABOLIC_REPROGRAMMING_IN_COLON_CANCER		35	0.415169	1.34577	0.102	0.585817	1	1187	tags=23%, list=15%, signal=27%	-1.34577
JIANG_AGING_CEREBRAL_CORTEX_DN		36	0.417122	1.34552	0.0866142	0.58418	1	1691	tags=39%, list=22%, signal=49%	-1.34552
SHEDDEN_LUNG_CANCER_POOR_SURVIVAL_A6		212	0.311966	1.34473	0.012844	0.584324	1	1695	tags=29%, list=22%, signal=36%	-1.34473
WP_PI3KAKT_SIGNALING_PATHWAY		134	0.330855	1.34246	0.00994036	0.590249	1	1896	tags=34%, list=24%, signal=45%	-1.34246
ZHAN_MULTIPLE_MYELOMA_MF_DN		22	0.45703	1.34041	0.103053	0.595514	1	539	tags=23%, list=7%, signal=24%	-1.34041
REACTOME_INTEGRIN_SIGNALING		20	0.472568	1.33913	0.105769	0.597413	1	713	tags=30%, list=9%, signal=33%	-1.33913
SWEET_KRAS_TARGETS_UP		44	0.396085	1.33892	0.0854871	0.595623	1	552	tags=16%, list=7%, signal=17%	-1.33892
BOUDOUKHA_BOUND_BY_IGF2BP2		62	0.36653	1.33758	0.0604396	0.598032	1	1634	tags=26%, list=21%, signal=32%	-1.33758
WP_MONOAMINE_TRANSPORT		20	0.482995	1.33651	0.12233	0.599587	1	2380	tags=55%, list=31%, signal=79%	-1.33651
FRIDMAN_IMMORTALIZATION_DN		16	0.510833	1.33509	0.110417	0.602348	1	1209	tags=44%, list=16%, signal=52%	-1.33509
LEE_CALORIE_RESTRICTION_MUSCLE_UP		20	0.473539	1.33424	0.0991903	0.602852	1	1543	tags=40%, list=20%, signal=50%	-1.33424
REACTOME_METABOLISM_OF_VITAMINS_AND_COFACTORS		96	0.347678	1.33414	0.0411985	0.600766	1	2002	tags=39%, list=26%, signal=51%	-1.33414
PID_NECTIN_PATHWAY		23	0.452887	1.33192	0.111801	0.606513	1	2134	tags=48%, list=27%, signal=66%	-1.33192
HARRIS_BRAIN_CANCER_PROGENITORS		19	0.478397	1.33051	0.13215	0.609164	1	1487	tags=37%, list=19%, signal=45%	-1.33051
BOYLAN_MULTIPLE_MYELOMA_D_DN		41	0.398891	1.32838	0.107861	0.614616	1	797	tags=24%, list=10%, signal=27%	-1.32838
REACTOME_ENDOSOMAL_SORTING_COMPLEX_REQUIRED_FOR_TRANSPORT_ESCRT		23	0.448569	1.32411	0.116371	0.628568	1	1354	tags=39%, list=17%, signal=47%	-1.32411
CHEMNITZ_RESPONSE_TO_PROSTAGLANDIN_E2_UP		68	0.367343	1.32378	0.0717054	0.627199	1	1106	tags=21%, list=14%, signal=24%	-1.32378
ROVERSI_GLIOMA_LOH_REGIONS		24	0.444977	1.32275	0.118609	0.628739	1	1571	tags=38%, list=20%, signal=47%	-1.32275
PILON_KLF1_TARGETS_UP		249	0.30051	1.32234	0.0134875	0.62783	1	1343	tags=22%, list=17%, signal=26%	-1.32234
BLANCO_MELO_COVID19_SARS_COV_2_LOW_MOI_INFECTION_A594_ACE2_EXPRESSING_CELLS_UP		33	0.417638	1.32075	0.0868687	0.631223	1	860	tags=30%, list=11%, signal=34%	-1.32075
REACTOME_SYNTHESIS_OF_PA		20	0.471787	1.32071	0.124767	0.628867	1	1821	tags=50%, list=23%, signal=65%	-1.32071
REACTOME_DOWNSTREAM_SIGNALING_EVENTS_OF_B_CELL_RECEPTOR_BCR		58	0.368431	1.31985	0.0770833	0.629618	1	1677	tags=36%, list=22%, signal=46%	-1.31985
SOGA_COLORECTAL_CANCER_MYC_UP		57	0.372435	1.31944	0.0752475	0.62867	1	1982	tags=40%, list=25%, signal=54%	-1.31944
WP_EPO_RECEPTOR_SIGNALING		15	0.508845	1.31929	0.14	0.626789	1	1817	tags=27%, list=23%, signal=35%	-1.31929
REACTOME_INFECTION_WITH_MYCOBACTERIUM_TUBERCULOSIS		17	0.493094	1.31912	0.142857	0.62498	1	1090	tags=35%, list=14%, signal=41%	-1.31912
PID_HDAC_CLASSII_PATHWAY		24	0.452582	1.3172	0.110891	0.62985	1	1848	tags=46%, list=24%, signal=60%	-1.3172
SMID_BREAST_CANCER_RELAPSE_IN_BONE_DN		110	0.330551	1.31679	0.0417457	0.628952	1	1688	tags=35%, list=22%, signal=45%	-1.31679
SMITH_LIVER_CANCER		28	0.43462	1.316	0.121901	0.629355	1	473	tags=18%, list=6%, signal=19%	-1.316
REACTOME_TRANSFERRIN_ENDOCYTOSIS_AND_RECYCLING		16	0.507944	1.31567	0.115152	0.628124	1	1692	tags=50%, list=22%, signal=64%	-1.31567
PID_TCR_PATHWAY		30	0.424156	1.31547	0.121514	0.626411	1	1138	tags=27%, list=15%, signal=31%	-1.31547
BRUECKNER_TARGETS_OF_MIRLET7A3_UP		57	0.371034	1.31377	0.0681818	0.630641	1	1824	tags=40%, list=23%, signal=52%	-1.31377
COLIN_PILOCYTIC_ASTROCYTOMA_VS_GLIOBLASTOMA_DN		19	0.486132	1.31286	0.118199	0.631447	1	942	tags=26%, list=12%, signal=30%	-1.31286
HUANG_FOXA2_TARGETS_UP		19	0.470857	1.31033	0.122807	0.638559	1	1560	tags=47%, list=20%, signal=59%	-1.31033
WP_TNFRELATED_WEAK_INDUCER_OF_APOPTOSIS_TWEAK_SIGNALING_PATHWAY		18	0.467383	1.31002	0.148148	0.637333	1	1122	tags=28%, list=14%, signal=32%	-1.31002
BIOCARTA_KERATINOCYTE_PATHWAY		20	0.46528	1.30965	0.147059	0.636261	1	2016	tags=50%, list=26%, signal=67%	-1.30965
SOGA_COLORECTAL_CANCER_MYC_DN		34	0.413818	1.30834	0.119843	0.638744	1	1210	tags=21%, list=16%, signal=24%	-1.30834
REACTOME_SIGNALING_BY_BRAF_AND_RAF1_FUSIONS		37	0.406657	1.30817	0.114786	0.636989	1	1421	tags=35%, list=18%, signal=43%	-1.30817
CREIGHTON_ENDOCRINE_THERAPY_RESISTANCE_3		339	0.288929	1.30641	0.0108499	0.641258	1	1574	tags=26%, list=20%, signal=31%	-1.30641
WP_COMPLEMENT_AND_COAGULATION_CASCADES		23	0.449046	1.30475	0.134387	0.644911	1	1303	tags=30%, list=17%, signal=36%	-1.30475
REACTOME_DNA_DAMAGE_RECOGNITION_IN_GG_NER		23	0.454926	1.30391	0.132692	0.64591	1	1717	tags=48%, list=22%, signal=61%	-1.30391
REACTOME_DDX58_IFIH1_MEDIATED_INDUCTION_OF_INTERFERON_ALPHA_BETA		42	0.394598	1.30355	0.112	0.644768	1	1026	tags=26%, list=13%, signal=30%	-1.30355
WP_HEPATOCYTE_GROWTH_FACTOR_RECEPTOR_SIGNALING		25	0.438252	1.30169	0.122807	0.649363	1	2374	tags=32%, list=30%, signal=46%	-1.30169
NABA_ECM_GLYCOPROTEINS		64	0.359789	1.30072	0.0917431	0.650949	1	810	tags=19%, list=10%, signal=21%	-1.30072
LEE_AGING_CEREBELLUM_UP		40	0.393461	1.3006	0.11546	0.648991	1	1273	tags=28%, list=16%, signal=33%	-1.3006
KEGG_GLYCINE_SERINE_AND_THREONINE_METABOLISM		18	0.476334	1.30022	0.15625	0.648239	1	637	tags=22%, list=8%, signal=24%	-1.30022
REACTOME_NUCLEAR_RECEPTOR_TRANSCRIPTION_PATHWAY		20	0.455645	1.29944	0.13786	0.648726	1	438	tags=15%, list=6%, signal=16%	-1.29944
MARTINEZ_RESPONSE_TO_TRABECTEDIN_UP		38	0.393382	1.29936	0.10142	0.646684	1	284	tags=11%, list=4%, signal=11%	-1.29936
WP_CYTOSOLIC_DNASENSING_PATHWAY		34	0.40424	1.29912	0.112676	0.645194	1	2202	tags=47%, list=28%, signal=65%	-1.29912
REACTOME_HEDGEHOG_ON_STATE		54	0.369677	1.29847	0.102119	0.645212	1	1677	tags=37%, list=22%, signal=47%	-1.29847
WP_MELATONIN_METABOLISM_AND_EFFECTS		16	0.484723	1.29813	0.142553	0.644048	1	101	tags=13%, list=1%, signal=13%	-1.29813
PID_IL12_2PATHWAY		16	0.48336	1.29653	0.149606	0.647783	1	2374	tags=56%, list=30%, signal=81%	-1.29653
CHIANG_LIVER_CANCER_SUBCLASS_PROLIFERATION_DN		63	0.357733	1.29629	0.0872865	0.646278	1	986	tags=17%, list=13%, signal=20%	-1.29629
JISON_SICKLE_CELL_DISEASE_UP		84	0.338702	1.29618	0.0710059	0.644333	1	2041	tags=42%, list=26%, signal=56%	-1.29618
LI_DCP2_BOUND_MRNA		71	0.351154	1.29383	0.0813954	0.651239	1	1528	tags=34%, list=20%, signal=42%	-1.29383
WP_TCELL_RECEPTOR_SIGNALING_PATHWAY		35	0.403248	1.29364	0.101796	0.649781	1	2016	tags=37%, list=26%, signal=50%	-1.29364
KEGG_T_CELL_RECEPTOR_SIGNALING_PATHWAY		41	0.383	1.29351	0.116959	0.647959	1	2342	tags=44%, list=30%, signal=62%	-1.29351
BOSCO_TH1_CYTOTOXIC_MODULE		22	0.448282	1.29325	0.137546	0.646755	1	367	tags=18%, list=5%, signal=19%	-1.29325
WP_2Q37_COPY_NUMBER_VARIATION_SYNDROME		51	0.371247	1.29141	0.104651	0.651705	1	1404	tags=22%, list=18%, signal=26%	-1.29141
REACTOME_ANTIGEN_PROCESSING_CROSS_PRESENTATION		68	0.357252	1.29009	0.0786948	0.654516	1	1579	tags=32%, list=20%, signal=40%	-1.29009
MIDORIKAWA_AMPLIFIED_IN_LIVER_CANCER		31	0.420346	1.28964	0.108434	0.654022	1	799	tags=23%, list=10%, signal=25%	-1.28964
REACTOME_SENSORY_PERCEPTION		80	0.348855	1.28785	0.0787402	0.658755	1	2043	tags=41%, list=26%, signal=55%	-1.28785
REACTOME_SIGNALING_BY_VEGF		64	0.357695	1.28686	0.0996169	0.660512	1	2002	tags=42%, list=26%, signal=56%	-1.28686
DEMAGALHAES_AGING_UP		28	0.417896	1.2867	0.123457	0.658773	1	1341	tags=29%, list=17%, signal=34%	-1.2867
REACTOME_TRANSPORT_OF_VITAMINS_NUCLEOSIDES_AND_RELATED_MOLECULES		16	0.484546	1.28652	0.165714	0.657241	1	1739	tags=38%, list=22%, signal=48%	-1.28652
TONKS_TARGETS_OF_RUNX1_RUNX1T1_FUSION_ERYTHROCYTE_UP		63	0.35284	1.2865	0.0755814	0.655088	1	1327	tags=27%, list=17%, signal=32%	-1.2865
KEGG_RENAL_CELL_CARCINOMA		34	0.398217	1.28541	0.128459	0.65718	1	1680	tags=26%, list=22%, signal=34%	-1.28541
MIKKELSEN_IPS_LCP_WITH_H3K4ME3		50	0.370306	1.28473	0.0877863	0.657632	1	1505	tags=22%, list=19%, signal=27%	-1.28473
PID_INTEGRIN2_PATHWAY		15	0.481396	1.28368	0.166667	0.659626	1	691	tags=40%, list=9%, signal=44%	-1.28368
WP_TOLLLIKE_RECEPTOR_SIGNALING_RELATED_TO_MYD88		18	0.474542	1.28338	0.16826	0.658533	1	515	tags=22%, list=7%, signal=24%	-1.28338
REACTOME_INTERLEUKIN_1_FAMILY_SIGNALING		88	0.337157	1.2827	0.0722022	0.658962	1	1579	tags=31%, list=20%, signal=38%	-1.2827
KEGG_AMINO_SUGAR_AND_NUCLEOTIDE_SUGAR_METABOLISM		32	0.403283	1.28204	0.116371	0.659314	1	1457	tags=34%, list=19%, signal=42%	-1.28204
KEGG_ACUTE_MYELOID_LEUKEMIA		28	0.424158	1.2818	0.117761	0.657978	1	1016	tags=25%, list=13%, signal=29%	-1.2818
HWANG_PROSTATE_CANCER_MARKERS		18	0.4758	1.28131	0.174098	0.657654	1	2243	tags=44%, list=29%, signal=62%	-1.28131
LEE_AGING_NEOCORTEX_DN		31	0.413235	1.28059	0.125245	0.658069	1	1867	tags=42%, list=24%, signal=55%	-1.28059
WP_FACTORS_AND_PATHWAYS_AFFECTING_INSULINLIKE_GROWTH_FACTOR_IGF1AKT_SIGNALING		24	0.445794	1.27967	0.137255	0.659525	1	2016	tags=50%, list=26%, signal=67%	-1.27967
WP_INTERLEUKIN1_IL1_STRUCTURAL_PATHWAY		29	0.42084	1.27958	0.122093	0.657728	1	1167	tags=38%, list=15%, signal=44%	-1.27958
CHARAFE_BREAST_CANCER_LUMINAL_VS_MESENCHYMAL_UP		174	0.301918	1.27932	0.0318725	0.656603	1	948	tags=18%, list=12%, signal=20%	-1.27932
NICK_RESPONSE_TO_PROC_TREATMENT_DN		16	0.479355	1.27845	0.176938	0.65778	1	714	tags=25%, list=9%, signal=27%	-1.27845
WP_ERBB_SIGNALING_PATHWAY		42	0.386181	1.27836	0.109562	0.655905	1	2337	tags=43%, list=30%, signal=61%	-1.27836
REACTOME_PCP_CE_PATHWAY		61	0.362004	1.27818	0.0996169	0.654515	1	1832	tags=38%, list=23%, signal=49%	-1.27818
REACTOME_REGULATION_OF_RAS_BY_GAPS		53	0.366729	1.27798	0.101594	0.653139	1	1707	tags=38%, list=22%, signal=48%	-1.27798
SERVITJA_LIVER_HNF1A_TARGETS_DN		50	0.374264	1.27704	0.101392	0.654678	1	1382	tags=30%, list=18%, signal=36%	-1.27704
HAN_JNK_SINGALING_DN		19	0.460033	1.27456	0.143426	0.662126	1	1487	tags=42%, list=19%, signal=52%	-1.27456
PID_FCER1_PATHWAY		35	0.402027	1.27435	0.12069	0.660776	1	2016	tags=43%, list=26%, signal=58%	-1.27435
CHIARADONNA_NEOPLASTIC_TRANSFORMATION_CDC25_DN		70	0.349137	1.27246	0.111554	0.665789	1	2108	tags=43%, list=27%, signal=58%	-1.27246
CASORELLI_APL_SECONDARY_VS_DE_NOVO_UP		15	0.484647	1.27235	0.165029	0.664077	1	503	tags=33%, list=6%, signal=36%	-1.27235
PID_ERBB1_RECEPTOR_PROXIMAL_PATHWAY		25	0.434457	1.2718	0.142857	0.663989	1	1896	tags=24%, list=24%, signal=32%	-1.2718
REACTOME_TOLL_LIKE_RECEPTOR_9_TLR9_CASCADE		53	0.356234	1.27108	0.0956175	0.6647	1	1324	tags=32%, list=17%, signal=38%	-1.27108
DELYS_THYROID_CANCER_UP		172	0.301243	1.27078	0.0487365	0.663757	1	1200	tags=22%, list=15%, signal=26%	-1.27078
REACTOME_MITOPHAGY		22	0.441312	1.27014	0.15873	0.664037	1	1844	tags=41%, list=24%, signal=53%	-1.27014
PID_FOXO_PATHWAY		20	0.449455	1.26962	0.153846	0.663833	1	1016	tags=30%, list=13%, signal=34%	-1.26962
LEE_LIVER_CANCER_ACOX1_DN		21	0.453273	1.2695	0.148515	0.662204	1	203	tags=14%, list=3%, signal=15%	-1.2695
REACTOME_INTRACELLULAR_SIGNALING_BY_SECOND_MESSENGERS		173	0.300853	1.26947	0.039924	0.660296	1	1021	tags=18%, list=13%, signal=20%	-1.26947
WP_APOPTOSIS		33	0.404197	1.26877	0.140039	0.660924	1	1167	tags=30%, list=15%, signal=35%	-1.26877
LEIN_CHOROID_PLEXUS_MARKERS		32	0.401189	1.26864	0.152475	0.659404	1	329	tags=13%, list=4%, signal=13%	-1.26864
HADDAD_T_LYMPHOCYTE_AND_NK_PROGENITOR_DN		17	0.464784	1.26784	0.168651	0.660401	1	926	tags=29%, list=12%, signal=33%	-1.26784
WP_SELENIUM_MICRONUTRIENT_NETWORK		48	0.369434	1.26713	0.116959	0.660989	1	2386	tags=52%, list=31%, signal=75%	-1.26713
GAUSSMANN_MLL_AF4_FUSION_TARGETS_F_DN		15	0.483887	1.26682	0.163569	0.660153	1	637	tags=20%, list=8%, signal=22%	-1.26682
CHARAFE_BREAST_CANCER_BASAL_VS_MESENCHYMAL_UP		26	0.432338	1.26673	0.161359	0.658507	1	2085	tags=54%, list=27%, signal=73%	-1.26673
REACTOME_SIGNALING_BY_FGFR1		24	0.426338	1.26584	0.160417	0.659997	1	3154	tags=67%, list=40%, signal=112%	-1.26584
REACTOME_FACTORS_INVOLVED_IN_MEGAKARYOCYTE_DEVELOPMENT_AND_PLATELET_PRODUCTION		46	0.373827	1.26579	0.12605	0.658196	1	1095	tags=26%, list=14%, signal=30%	-1.26579
REACTOME_SYNTHESIS_OF_PC		19	0.456695	1.26491	0.150905	0.659254	1	1478	tags=37%, list=19%, signal=45%	-1.26491
WP_AGERAGE_PATHWAY		36	0.389873	1.26474	0.143667	0.657925	1	2016	tags=42%, list=26%, signal=56%	-1.26474
XIE_LT_HSC_S1PR3_OE_UP		15	0.485278	1.26461	0.167954	0.656462	1	879	tags=27%, list=11%, signal=30%	-1.26461
REACTOME_CONSTITUTIVE_SIGNALING_BY_ABERRANT_PI3K_IN_CANCER		26	0.414622	1.26403	0.142582	0.656665	1	890	tags=19%, list=11%, signal=22%	-1.26403
KEGG_ERBB_SIGNALING_PATHWAY		42	0.381945	1.264	0.126819	0.654786	1	1896	tags=33%, list=24%, signal=44%	-1.264
PID_CD8_TCR_PATHWAY		23	0.434659	1.26292	0.162109	0.656932	1	1016	tags=26%, list=13%, signal=30%	-1.26292
REACTOME_CHONDROITIN_SULFATE_DERMATAN_SULFATE_METABOLISM		25	0.422472	1.26273	0.160896	0.655752	1	1067	tags=36%, list=14%, signal=42%	-1.26273
SERVITJA_ISLET_HNF1A_TARGETS_DN		34	0.397942	1.2625	0.134269	0.654725	1	1640	tags=29%, list=21%, signal=37%	-1.2625
WP_EGFEGFR_SIGNALING_PATHWAY		106	0.319902	1.26214	0.0572519	0.654156	1	2374	tags=42%, list=30%, signal=59%	-1.26214
WANG_CISPLATIN_RESPONSE_AND_XPC_DN		107	0.323059	1.26179	0.0811881	0.65353	1	1305	tags=22%, list=17%, signal=27%	-1.26179
WEST_ADRENOCORTICAL_TUMOR_DN		266	0.285026	1.26178	0.0474453	0.651654	1	1911	tags=32%, list=25%, signal=40%	-1.26178
BROWNE_HCMV_INFECTION_2HR_DN		19	0.449549	1.26091	0.152672	0.652926	1	1207	tags=37%, list=15%, signal=43%	-1.26091
BREDEMEYER_RAG_SIGNALING_VIA_ATM_NOT_VIA_NFKB_DN		16	0.481194	1.26087	0.17284	0.651207	1	950	tags=38%, list=12%, signal=43%	-1.26087
AMIT_SERUM_RESPONSE_480_MCF10A		15	0.473427	1.26056	0.159449	0.650469	1	1426	tags=47%, list=18%, signal=57%	-1.26056
BYSTRYKH_HEMATOPOIESIS_STEM_CELL_AND_BRAIN_QTL_CIS		52	0.354594	1.26054	0.10124	0.648663	1	1580	tags=31%, list=20%, signal=38%	-1.26054
BHAT_ESR1_TARGETS_NOT_VIA_AKT1_DN		35	0.388902	1.2594	0.146771	0.650948	1	1327	tags=29%, list=17%, signal=34%	-1.2594
REACTOME_SENSORY_PROCESSING_OF_SOUND_BY_OUTER_HAIR_CELLS_OF_THE_COCHLEA		20	0.446214	1.25913	0.168906	0.65	1	1911	tags=45%, list=25%, signal=59%	-1.25913
REACTOME_TELOMERE_C_STRAND_LAGGING_STRAND_SYNTHESIS		19	0.465069	1.25832	0.17357	0.651118	1	1206	tags=37%, list=15%, signal=43%	-1.25832
PID_UPA_UPAR_PATHWAY		25	0.426248	1.25706	0.187377	0.653939	1	1389	tags=32%, list=18%, signal=39%	-1.25706
KEGG_PYRIMIDINE_METABOLISM		59	0.354976	1.25579	0.115308	0.656905	1	2237	tags=46%, list=29%, signal=64%	-1.25579
BERENJENO_TRANSFORMED_BY_RHOA_DN		241	0.286048	1.2554	0.0394477	0.656591	1	1702	tags=30%, list=22%, signal=38%	-1.2554
WP_MAPK_SIGNALING_PATHWAY		105	0.31583	1.25468	0.0815109	0.657517	1	1433	tags=29%, list=18%, signal=35%	-1.25468
WIERENGA_STAT5A_TARGETS_DN		75	0.339849	1.25451	0.0965909	0.656277	1	2093	tags=40%, list=27%, signal=54%	-1.25451
KEGG_INSULIN_SIGNALING_PATHWAY		68	0.341573	1.2544	0.10058	0.654828	1	2306	tags=46%, list=30%, signal=64%	-1.2544
REACTOME_METABOLISM_OF_PORPHYRINS		15	0.485823	1.2543	0.194779	0.65337	1	1752	tags=40%, list=22%, signal=51%	-1.2543
SMIRNOV_CIRCULATING_ENDOTHELIOCYTES_IN_CANCER_UP		56	0.350369	1.25422	0.10119	0.651792	1	641	tags=20%, list=8%, signal=21%	-1.25422
PID_AVB3_INTEGRIN_PATHWAY		39	0.377968	1.25412	0.144309	0.650392	1	1896	tags=38%, list=24%, signal=51%	-1.25412
KEGG_TGF_BETA_SIGNALING_PATHWAY		27	0.414805	1.25351	0.154618	0.650725	1	2966	tags=67%, list=38%, signal=107%	-1.25351
WP_APOPTOSIS_MODULATION_AND_SIGNALING		41	0.377048	1.25064	0.136821	0.659614	1	1026	tags=27%, list=13%, signal=31%	-1.25064
GAZDA_DIAMOND_BLACKFAN_ANEMIA_MYELOID_DN		23	0.443665	1.24831	0.170588	0.666551	1	1116	tags=30%, list=14%, signal=35%	-1.24831
CORRE_MULTIPLE_MYELOMA_DN		24	0.431242	1.24806	0.159449	0.665653	1	1203	tags=29%, list=15%, signal=34%	-1.24806
NAKAMURA_ADIPOGENESIS_EARLY_UP		22	0.426793	1.24781	0.165323	0.664742	1	2206	tags=50%, list=28%, signal=70%	-1.24781
REACTOME_DEATH_RECEPTOR_SIGNALLING		82	0.33486	1.24676	0.101961	0.666755	1	1026	tags=20%, list=13%, signal=22%	-1.24676
KIM_WT1_TARGETS_8HR_DN		46	0.365253	1.24631	0.123047	0.666603	1	838	tags=17%, list=11%, signal=19%	-1.24631
REACTOME_CLASS_I_MHC_MEDIATED_ANTIGEN_PROCESSING_PRESENTATION		233	0.28364	1.24603	0.0512821	0.665706	1	1436	tags=25%, list=18%, signal=30%	-1.24603
DITTMER_PTHLH_TARGETS_UP		68	0.339733	1.24531	0.124046	0.666584	1	2082	tags=43%, list=27%, signal=58%	-1.24531
NIKOLSKY_BREAST_CANCER_8Q23_Q24_AMPLICON		67	0.336375	1.24506	0.116054	0.665547	1	1608	tags=30%, list=21%, signal=37%	-1.24506
WP_GLYCEROPHOSPHOLIPID_BIOSYNTHETIC_PATHWAY		21	0.438767	1.24379	0.166667	0.668297	1	1821	tags=33%, list=23%, signal=43%	-1.24379
REACTOME_TRAFFICKING_OF_AMPA_RECEPTORS		18	0.45	1.24353	0.181208	0.667405	1	1021	tags=33%, list=13%, signal=38%	-1.24353
RUTELLA_RESPONSE_TO_HGF_VS_CSF2RB_AND_IL4_UP		204	0.286781	1.24162	0.0441459	0.672767	1	1246	tags=23%, list=16%, signal=26%	-1.24162
TRAYNOR_RETT_SYNDROM_UP		19	0.452056	1.2411	0.186747	0.672941	1	2252	tags=47%, list=29%, signal=66%	-1.2411
NAGASHIMA_NRG1_SIGNALING_UP		55	0.351105	1.24068	0.1423	0.67269	1	697	tags=18%, list=9%, signal=20%	-1.24068
PID_ENDOTHELIN_PATHWAY		30	0.395498	1.24021	0.174329	0.672779	1	1952	tags=37%, list=25%, signal=49%	-1.24021
KUMAR_TARGETS_OF_MLL_AF9_FUSION		181	0.291895	1.23984	0.0574074	0.672475	1	1318	tags=25%, list=17%, signal=29%	-1.23984
GAZDA_DIAMOND_BLACKFAN_ANEMIA_PROGENITOR_UP		19	0.443145	1.2394	0.200393	0.672287	1	1794	tags=37%, list=23%, signal=48%	-1.2394
TENEDINI_MEGAKARYOCYTE_MARKERS		16	0.460618	1.23869	0.189024	0.67308	1	1246	tags=44%, list=16%, signal=52%	-1.23869
REACTOME_ADAPTIVE_IMMUNE_SYSTEM		371	0.269715	1.23824	0.0209524	0.672951	1	1439	tags=23%, list=18%, signal=27%	-1.23824
REACTOME_GOLGI_ASSOCIATED_VESICLE_BIOGENESIS		41	0.373857	1.238	0.145383	0.67203	1	1212	tags=27%, list=16%, signal=32%	-1.238
WP_CARDIAC_HYPERTROPHIC_RESPONSE		26	0.423735	1.23784	0.17126	0.670834	1	2342	tags=54%, list=30%, signal=77%	-1.23784
BOCHKIS_FOXA2_TARGETS		203	0.288338	1.23744	0.0545113	0.670652	1	1780	tags=30%, list=23%, signal=38%	-1.23744
REACTOME_MICRORNA_MIRNA_BIOGENESIS		18	0.444776	1.23464	0.192157	0.679572	1	1420	tags=33%, list=18%, signal=41%	-1.23464
HANN_RESISTANCE_TO_BCL2_INHIBITOR_DN		18	0.444466	1.23166	0.195402	0.689272	1	2044	tags=39%, list=26%, signal=53%	-1.23166
CAIRO_HEPATOBLASTOMA_DN		100	0.318651	1.23143	0.108696	0.688317	1	1182	tags=25%, list=15%, signal=29%	-1.23143
TANG_SENESCENCE_TP53_TARGETS_DN		15	0.46699	1.23103	0.197938	0.688043	1	1885	tags=53%, list=24%, signal=70%	-1.23103
REACTOME_SIGNALING_BY_NTRKS		77	0.328065	1.22881	0.112648	0.694662	1	1817	tags=34%, list=23%, signal=44%	-1.22881
BEGUM_TARGETS_OF_PAX3_FOXO1_FUSION_DN		15	0.471745	1.22872	0.197034	0.693204	1	810	tags=27%, list=10%, signal=30%	-1.22872
WP_CORTICOTROPINRELEASING_HORMONE_SIGNALING_PATHWAY		41	0.370605	1.22795	0.182178	0.694345	1	2033	tags=49%, list=26%, signal=66%	-1.22795
KEGG_MAPK_SIGNALING_PATHWAY		109	0.31467	1.22748	0.10757	0.694418	1	1616	tags=31%, list=21%, signal=39%	-1.22748
IVANOVSKA_MIR106B_TARGETS		48	0.357482	1.22737	0.13035	0.693063	1	1106	tags=25%, list=14%, signal=29%	-1.22737
REACTOME_PLATELET_ACTIVATION_SIGNALING_AND_AGGREGATION		145	0.297926	1.22357	0.0805501	0.70579	1	2264	tags=41%, list=29%, signal=57%	-1.22357
GRAESSMANN_APOPTOSIS_BY_SERUM_DEPRIVATION_UP		231	0.277988	1.22355	0.0587084	0.704072	1	1179	tags=22%, list=15%, signal=25%	-1.22355
PID_AURORA_A_PATHWAY		15	0.462407	1.22286	0.194915	0.705061	1	703	tags=27%, list=9%, signal=29%	-1.22286
PID_CDC42_PATHWAY		45	0.36583	1.22166	0.192678	0.707773	1	2280	tags=49%, list=29%, signal=69%	-1.22166
LEE_AGING_MUSCLE_UP		15	0.468624	1.22152	0.206478	0.706533	1	1308	tags=40%, list=17%, signal=48%	-1.22152
REACTOME_DECTIN_1_MEDIATED_NONCANONICAL_NF_KB_SIGNALING		47	0.356963	1.22139	0.185039	0.705238	1	1677	tags=36%, list=22%, signal=46%	-1.22139
WANG_MLL_TARGETS		96	0.315353	1.22101	0.111328	0.704869	1	911	tags=20%, list=12%, signal=22%	-1.22101
REACTOME_METABOLISM_OF_FAT_SOLUBLE_VITAMINS		25	0.41193	1.21985	0.173828	0.707599	1	1995	tags=44%, list=26%, signal=59%	-1.21985
WP_RANKLRANK_SIGNALING_PATHWAY		30	0.397185	1.21984	0.177062	0.70585	1	2016	tags=43%, list=26%, signal=58%	-1.21984
NELSON_RESPONSE_TO_ANDROGEN_UP		41	0.366946	1.21971	0.164486	0.704634	1	1877	tags=39%, list=24%, signal=51%	-1.21971
SCIBETTA_KDM5B_TARGETS_DN		41	0.366432	1.21913	0.161088	0.705113	1	1646	tags=29%, list=21%, signal=37%	-1.21913
REACTOME_MYD88_INDEPENDENT_TLR4_CASCADE		55	0.349836	1.21679	0.143969	0.711931	1	1324	tags=31%, list=17%, signal=37%	-1.21679
REACTOME_SYNTHESIS_OF_ACTIVE_UBIQUITIN_ROLES_OF_E1_AND_E2_ENZYMES		18	0.439939	1.21635	0.204124	0.711788	1	2525	tags=50%, list=32%, signal=74%	-1.21635
TOOKER_GEMCITABINE_RESISTANCE_DN		80	0.325109	1.21575	0.140713	0.712348	1	1673	tags=30%, list=21%, signal=38%	-1.21575
WP_ALZHEIMERS_DISEASE		141	0.294445	1.21533	0.0807339	0.712261	1	2023	tags=31%, list=26%, signal=41%	-1.21533
CARRILLOREIXACH_HEPATOBLASTOMA_VS_NORMAL_DN		374	0.264273	1.21448	0.0511811	0.713717	1	1726	tags=28%, list=22%, signal=34%	-1.21448
WP_HEPATITIS_B_INFECTION		68	0.332979	1.21443	0.136095	0.712128	1	1167	tags=22%, list=15%, signal=26%	-1.21443
MEBARKI_HCC_PROGENITOR_FZD8CRD_UP		152	0.292252	1.21373	0.11002	0.713043	1	1634	tags=32%, list=21%, signal=40%	-1.21373
PASQUALUCCI_LYMPHOMA_BY_GC_STAGE_UP		149	0.295292	1.21368	0.0898662	0.711504	1	532	tags=13%, list=7%, signal=13%	-1.21368
REACTOME_PLASMA_LIPOPROTEIN_ASSEMBLY_REMODELING_AND_CLEARANCE		34	0.377565	1.21172	0.184	0.717166	1	1958	tags=50%, list=25%, signal=66%	-1.21172
REACTOME_DISEASES_OF_METABOLISM		100	0.309706	1.21115	0.114	0.717613	1	1719	tags=34%, list=22%, signal=43%	-1.21115
WP_INTRAFLAGELLAR_TRANSPORT_PROTEINS_BINDING_TO_DYNEIN		18	0.445962	1.21089	0.225681	0.716776	1	1624	tags=44%, list=21%, signal=56%	-1.21089
SENGUPTA_NASOPHARYNGEAL_CARCINOMA_WITH_LMP1_DN		40	0.365835	1.20937	0.165399	0.720854	1	2051	tags=40%, list=26%, signal=54%	-1.20937
BROWNE_HCMV_INFECTION_48HR_DN		220	0.279239	1.20884	0.0756303	0.721202	1	1303	tags=21%, list=17%, signal=25%	-1.20884
WP_PYRIMIDINE_METABOLISM		50	0.345435	1.2084	0.159184	0.721188	1	2095	tags=40%, list=27%, signal=54%	-1.2084
BROWNE_HCMV_INFECTION_20HR_DN		49	0.351256	1.20798	0.17505	0.721131	1	1053	tags=18%, list=14%, signal=21%	-1.20798
HOSHIDA_LIVER_CANCER_SUBCLASS_S1		116	0.30157	1.20733	0.114504	0.721951	1	922	tags=18%, list=12%, signal=20%	-1.20733
TONKS_TARGETS_OF_RUNX1_RUNX1T1_FUSION_GRANULOCYTE_UP		23	0.420211	1.20624	0.21124	0.724365	1	2456	tags=52%, list=31%, signal=76%	-1.20624
REACTOME_EXTENSION_OF_TELOMERES		29	0.40284	1.20526	0.20396	0.726341	1	1957	tags=41%, list=25%, signal=55%	-1.20526
WP_IL4_SIGNALING_PATHWAY		30	0.393884	1.20491	0.187984	0.726	1	2039	tags=40%, list=26%, signal=54%	-1.20491
PELLICCIOTTA_HDAC_IN_ANTIGEN_PRESENTATION_DN		34	0.372169	1.20418	0.181481	0.727255	1	1579	tags=35%, list=20%, signal=44%	-1.20418
BIOCARTA_PDGF_PATHWAY		16	0.449474	1.20335	0.210421	0.728643	1	1888	tags=38%, list=24%, signal=49%	-1.20335
WP_WNT_SIGNALING_PATHWAY		26	0.39573	1.2032	0.21328	0.727537	1	2027	tags=46%, list=26%, signal=62%	-1.2032
KEGG_PURINE_METABOLISM		99	0.309426	1.20316	0.105372	0.725992	1	2104	tags=37%, list=27%, signal=51%	-1.20316
CROMER_TUMORIGENESIS_UP		24	0.412967	1.20257	0.204981	0.726593	1	1671	tags=38%, list=21%, signal=48%	-1.20257
REACTOME_BILE_ACID_AND_BILE_SALT_METABOLISM		20	0.426531	1.20244	0.241935	0.725345	1	2048	tags=50%, list=26%, signal=68%	-1.20244
BRUINS_UVC_RESPONSE_VIA_TP53_GROUP_C		37	0.373502	1.20192	0.197628	0.725665	1	1464	tags=35%, list=19%, signal=43%	-1.20192
REACTOME_NEDDYLATION		148	0.289773	1.20184	0.104854	0.724279	1	1717	tags=32%, list=22%, signal=41%	-1.20184
WOO_LIVER_CANCER_RECURRENCE_DN		38	0.36938	1.20165	0.183468	0.723301	1	1781	tags=39%, list=23%, signal=51%	-1.20165
CHYLA_CBFA2T3_TARGETS_UP		126	0.296523	1.20153	0.108949	0.722038	1	875	tags=19%, list=11%, signal=21%	-1.20153
GRAESSMANN_RESPONSE_TO_MC_AND_SERUM_DEPRIVATION_UP		77	0.325056	1.20048	0.143403	0.724385	1	1179	tags=23%, list=15%, signal=27%	-1.20048
KEGG_WNT_SIGNALING_PATHWAY		59	0.337274	1.20037	0.15625	0.723111	1	2027	tags=41%, list=26%, signal=55%	-1.20037
WP_ALZHEIMERS_DISEASE_AND_MIRNA_EFFECTS		141	0.294445	1.19916	0.119522	0.726244	1	2023	tags=31%, list=26%, signal=41%	-1.19916
REACTOME_SIGNAL_AMPLIFICATION		17	0.442329	1.19905	0.237911	0.724958	1	2033	tags=59%, list=26%, signal=79%	-1.19905
ELVIDGE_HIF1A_TARGETS_UP		44	0.356636	1.19819	0.182927	0.726548	1	1121	tags=27%, list=14%, signal=32%	-1.19819
PID_BCR_5PATHWAY		34	0.370666	1.198	0.212371	0.72568	1	1122	tags=24%, list=14%, signal=27%	-1.198
REACTOME_METABOLISM_OF_WATER_SOLUBLE_VITAMINS_AND_COFACTORS		61	0.337007	1.19761	0.153082	0.72543	1	1154	tags=25%, list=15%, signal=29%	-1.19761
REACTOME_CLEC7A_DECTIN_1_SIGNALING		70	0.326234	1.19734	0.189243	0.724676	1	1751	tags=34%, list=22%, signal=44%	-1.19734
REACTOME_TRANSCRIPTIONAL_ACTIVATION_OF_MITOCHONDRIAL_BIOGENESIS		32	0.38223	1.19613	0.211045	0.727767	1	767	tags=22%, list=10%, signal=24%	-1.19613
WP_MAPK_CASCADE		20	0.424675	1.19609	0.206897	0.726253	1	1405	tags=35%, list=18%, signal=43%	-1.19609
DELYS_THYROID_CANCER_DN		103	0.305353	1.19595	0.145228	0.725125	1	824	tags=17%, list=11%, signal=18%	-1.19595
ZHANG_RESPONSE_TO_IKK_INHIBITOR_AND_TNF_DN		36	0.37094	1.194	0.186613	0.730899	1	900	tags=19%, list=12%, signal=22%	-1.194
FONTAINE_THYROID_TUMOR_UNCERTAIN_MALIGNANCY_UP		18	0.444663	1.19379	0.236084	0.730092	1	1896	tags=61%, list=24%, signal=81%	-1.19379
SMID_BREAST_CANCER_RELAPSE_IN_BRAIN_DN		34	0.378838	1.19358	0.195736	0.729165	1	1629	tags=32%, list=21%, signal=41%	-1.19358
SCHLOSSER_MYC_TARGETS_AND_SERUM_RESPONSE_DN		36	0.370261	1.19355	0.211499	0.727651	1	1511	tags=31%, list=19%, signal=38%	-1.19355
BURTON_ADIPOGENESIS_2		37	0.373976	1.19183	0.214844	0.732638	1	1837	tags=35%, list=24%, signal=46%	-1.19183
BASAKI_YBX1_TARGETS_UP		108	0.30362	1.19175	0.132114	0.731309	1	1471	tags=25%, list=19%, signal=30%	-1.19175
REACTOME_TNFR2_NON_CANONICAL_NF_KB_PATHWAY		49	0.345051	1.19164	0.175403	0.730058	1	1677	tags=35%, list=22%, signal=44%	-1.19164
BIOCARTA_EGF_PATHWAY		15	0.4554	1.19136	0.238462	0.729545	1	1888	tags=40%, list=24%, signal=53%	-1.19136
KEGG_CHRONIC_MYELOID_LEUKEMIA		35	0.365271	1.19107	0.194389	0.729044	1	2133	tags=37%, list=27%, signal=51%	-1.19107
DAZARD_RESPONSE_TO_UV_NHEK_UP		90	0.309528	1.19106	0.145068	0.727464	1	1324	tags=24%, list=17%, signal=29%	-1.19106
GAJATE_RESPONSE_TO_TRABECTEDIN_UP		29	0.379254	1.19059	0.211499	0.727562	1	1462	tags=28%, list=19%, signal=34%	-1.19059
REACTOME_A_TETRASACCHARIDE_LINKER_SEQUENCE_IS_REQUIRED_FOR_GAG_SYNTHESIS		17	0.456991	1.18952	0.247036	0.730108	1	1067	tags=41%, list=14%, signal=48%	-1.18952
WP_PANCREATIC_ADENOCARCINOMA_PATHWAY		42	0.351567	1.18736	0.190855	0.736872	1	2766	tags=50%, list=35%, signal=77%	-1.18736
KEGG_ADIPOCYTOKINE_SIGNALING_PATHWAY		34	0.372953	1.18518	0.227545	0.743335	1	1016	tags=24%, list=13%, signal=27%	-1.18518
REACTOME_HEMOSTASIS		273	0.264895	1.18458	0.0891089	0.744081	1	2063	tags=36%, list=26%, signal=47%	-1.18458
REACTOME_TRANS_GOLGI_NETWORK_VESICLE_BUDDING		54	0.338744	1.18403	0.179641	0.74451	1	1212	tags=24%, list=16%, signal=28%	-1.18403
WP_ANDROGEN_RECEPTOR_SIGNALING_PATHWAY		54	0.333223	1.18346	0.177024	0.745048	1	792	tags=15%, list=10%, signal=16%	-1.18346
NADLER_OBESITY_DN		28	0.383487	1.18239	0.228571	0.747682	1	2302	tags=39%, list=30%, signal=56%	-1.18239
SESTO_RESPONSE_TO_UV_C0		59	0.332328	1.18185	0.189453	0.748025	1	596	tags=14%, list=8%, signal=15%	-1.18185
FOROUTAN_PRODRANK_TGFB_EMT_UP		81	0.315076	1.18137	0.165703	0.748208	1	1020	tags=19%, list=13%, signal=21%	-1.18137
LIAO_METASTASIS		256	0.2681	1.18044	0.0856611	0.750105	1	1356	tags=21%, list=17%, signal=25%	-1.18044
LE_EGR2_TARGETS_DN		63	0.327929	1.18041	0.193227	0.748582	1	1538	tags=30%, list=20%, signal=37%	-1.18041
BILD_MYC_ONCOGENIC_SIGNATURE		98	0.303125	1.17871	0.165085	0.753689	1	1477	tags=27%, list=19%, signal=32%	-1.17871
CONRAD_STEM_CELL		15	0.461169	1.17866	0.255533	0.752295	1	1424	tags=27%, list=18%, signal=33%	-1.17866
MASSARWEH_TAMOXIFEN_RESISTANCE_UP		264	0.267369	1.17849	0.0820611	0.751347	1	1124	tags=18%, list=14%, signal=20%	-1.17849
REACTOME_CIRCADIAN_CLOCK		33	0.369506	1.17805	0.221172	0.751555	1	767	tags=21%, list=10%, signal=23%	-1.17805
PID_ECADHERIN_STABILIZATION_PATHWAY		31	0.374512	1.17574	0.227364	0.758903	1	2263	tags=35%, list=29%, signal=50%	-1.17574
REACTOME_SELECTIVE_AUTOPHAGY		45	0.352992	1.17571	0.206897	0.757381	1	1844	tags=33%, list=24%, signal=43%	-1.17571
REACTOME_FCERI_MEDIATED_NF_KB_ACTIVATION		60	0.324812	1.17536	0.166344	0.757058	1	1733	tags=35%, list=22%, signal=45%	-1.17536
REACTOME_SIGNALING_BY_RECEPTOR_TYROSINE_KINASES		273	0.263989	1.17529	0.0890538	0.755726	1	2044	tags=32%, list=26%, signal=42%	-1.17529
BIOCARTA_RAC1_PATHWAY		15	0.443865	1.1738	0.26096	0.759934	1	2479	tags=53%, list=32%, signal=78%	-1.1738
VANASSE_BCL2_TARGETS_DN		20	0.41976	1.17269	0.255446	0.762629	1	1246	tags=35%, list=16%, signal=42%	-1.17269
GALLUZZI_PERMEABILIZE_MITOCHONDRIA		23	0.401217	1.1723	0.221545	0.762549	1	1751	tags=52%, list=22%, signal=67%	-1.1723
CHEMNITZ_RESPONSE_TO_PROSTAGLANDIN_E2_DN		170	0.27773	1.17176	0.129094	0.763174	1	1573	tags=26%, list=20%, signal=32%	-1.17176
REACTOME_LATE_ENDOSOMAL_MICROAUTOPHAGY		22	0.404337	1.1713	0.27112	0.763331	1	1229	tags=36%, list=16%, signal=43%	-1.1713
REACTOME_BUDDING_AND_MATURATION_OF_HIV_VIRION		20	0.411776	1.17122	0.232742	0.762037	1	1354	tags=40%, list=17%, signal=48%	-1.17122
YAMASHITA_METHYLATED_IN_PROSTATE_CANCER		17	0.427001	1.1712	0.270325	0.760486	1	1930	tags=41%, list=25%, signal=55%	-1.1712
FOROUTAN_TGFB_EMT_UP		84	0.309897	1.17093	0.171026	0.759931	1	1020	tags=18%, list=13%, signal=20%	-1.17093
TCGA_GLIOBLASTOMA_COPY_NUMBER_UP		37	0.362644	1.17019	0.216216	0.761149	1	1064	tags=22%, list=14%, signal=25%	-1.17019
AMIT_EGF_RESPONSE_120_MCF10A		17	0.439554	1.16986	0.279208	0.760777	1	1723	tags=47%, list=22%, signal=60%	-1.16986
DIAZ_CHRONIC_MYELOGENOUS_LEUKEMIA_DN		42	0.355386	1.16953	0.208661	0.760365	1	407	tags=12%, list=5%, signal=12%	-1.16953
LIU_CMYB_TARGETS_UP		76	0.313322	1.16924	0.183953	0.759979	1	1419	tags=28%, list=18%, signal=33%	-1.16924
MEBARKI_HCC_PROGENITOR_FZD8CRD_DN		134	0.285733	1.16902	0.141777	0.7592	1	1515	tags=27%, list=19%, signal=33%	-1.16902
REACTOME_MITOTIC_G2_G2_M_PHASES		106	0.294411	1.16824	0.162651	0.760683	1	1716	tags=33%, list=22%, signal=42%	-1.16824
PANGAS_TUMOR_SUPPRESSION_BY_SMAD1_AND_SMAD5_UP		71	0.314246	1.16711	0.179884	0.763425	1	540	tags=14%, list=7%, signal=15%	-1.16711
GRAHAM_CML_DIVIDING_VS_NORMAL_QUIESCENT_UP		71	0.312232	1.16643	0.178138	0.764485	1	997	tags=24%, list=13%, signal=27%	-1.16643
WP_MYOMETRIAL_RELAXATION_AND_CONTRACTION_PATHWAYS		70	0.3193	1.16579	0.184906	0.765402	1	2033	tags=43%, list=26%, signal=57%	-1.16579
GAZDA_DIAMOND_BLACKFAN_ANEMIA_ERYTHROID_DN		207	0.271905	1.16571	0.119843	0.764142	1	1124	tags=21%, list=14%, signal=24%	-1.16571
WP_UREA_CYCLE_AND_ASSOCIATED_PATHWAYS		17	0.437579	1.16526	0.247984	0.764285	1	2281	tags=47%, list=29%, signal=66%	-1.16526
KEGG_PANCREATIC_CANCER		30	0.378423	1.1645	0.223938	0.765644	1	2016	tags=33%, list=26%, signal=45%	-1.1645
VANHARANTA_UTERINE_FIBROID_DN		25	0.384573	1.16413	0.23221	0.765518	1	1159	tags=28%, list=15%, signal=33%	-1.16413
YAO_TEMPORAL_RESPONSE_TO_PROGESTERONE_CLUSTER_14		106	0.293629	1.16393	0.161491	0.764694	1	777	tags=16%, list=10%, signal=18%	-1.16393
NABA_ECM_AFFILIATED		50	0.340173	1.16388	0.198131	0.763355	1	831	tags=20%, list=11%, signal=22%	-1.16388
PID_IL2_1PATHWAY		26	0.383054	1.16293	0.242972	0.765527	1	1817	tags=27%, list=23%, signal=35%	-1.16293
GRADE_COLON_AND_RECTAL_CANCER_DN		38	0.360749	1.16169	0.235409	0.768849	1	1933	tags=37%, list=25%, signal=49%	-1.16169
WP_PHYSICOCHEMICAL_FEATURES_AND_TOXICITYASSOCIATED_PATHWAYS		35	0.363612	1.16121	0.240481	0.769061	1	1954	tags=37%, list=25%, signal=49%	-1.16121
RUTELLA_RESPONSE_TO_HGF_UP		218	0.265936	1.16106	0.124764	0.768152	1	1246	tags=21%, list=16%, signal=24%	-1.16106
REACTOME_LYSOSOME_VESICLE_BIOGENESIS		27	0.384748	1.16103	0.232108	0.766746	1	1212	tags=33%, list=16%, signal=39%	-1.16103
FLECHNER_PBL_KIDNEY_TRANSPLANT_OK_VS_DONOR_UP		102	0.300108	1.15877	0.180769	0.773909	1	660	tags=16%, list=8%, signal=17%	-1.15877
REACTOME_SYNTHESIS_OF_BILE_ACIDS_AND_BILE_SALTS		18	0.416222	1.1586	0.256098	0.77304	1	2048	tags=50%, list=26%, signal=68%	-1.1586
VERHAAK_GLIOBLASTOMA_NEURAL		79	0.314734	1.15833	0.212766	0.772514	1	2660	tags=48%, list=34%, signal=72%	-1.15833
REACTOME_INNATE_IMMUNE_SYSTEM		497	0.247602	1.1582	0.0635209	0.77143	1	1782	tags=27%, list=23%, signal=32%	-1.1582
KRIEG_HYPOXIA_NOT_VIA_KDM3A		334	0.254453	1.15738	0.103578	0.773097	1	1738	tags=28%, list=22%, signal=34%	-1.15738
WP_PDGFRBETA_PATHWAY		18	0.419304	1.15729	0.254902	0.771891	1	2039	tags=44%, list=26%, signal=60%	-1.15729
REACTOME_TCR_SIGNALING		71	0.31249	1.15667	0.201183	0.772855	1	1733	tags=32%, list=22%, signal=41%	-1.15667
WP_NETWORK_MAP_OF_SARSCOV2_SIGNALING_PATHWAY		79	0.307292	1.15659	0.204918	0.771618	1	2047	tags=35%, list=26%, signal=48%	-1.15659
WP_SYNAPTIC_SIGNALING_PATHWAYS_ASSOCIATED_WITH_AUTISM_SPECTRUM_DISORDER		33	0.359143	1.15654	0.248532	0.770311	1	1680	tags=27%, list=22%, signal=35%	-1.15654
REACTOME_G_ALPHA_I_SIGNALLING_EVENTS		94	0.296026	1.15593	0.151456	0.771299	1	1952	tags=36%, list=25%, signal=48%	-1.15593
REACTOME_TOLL_LIKE_RECEPTOR_CASCADES		86	0.301617	1.15586	0.187123	0.770053	1	1386	tags=28%, list=18%, signal=34%	-1.15586
ELVIDGE_HYPOXIA_BY_DMOG_DN		35	0.360308	1.15378	0.241584	0.776417	1	1522	tags=34%, list=20%, signal=42%	-1.15378
WP_ANGIOPOIETINLIKE_PROTEIN_8_REGULATORY_PATHWAY		73	0.310569	1.15209	0.193294	0.78141	1	2916	tags=59%, list=37%, signal=93%	-1.15209
ANASTASSIOU_MULTICANCER_INVASIVENESS_SIGNATURE		23	0.391617	1.15124	0.265748	0.783155	1	1020	tags=30%, list=13%, signal=35%	-1.15124
ZHANG_GATA6_TARGETS_DN		29	0.376053	1.15073	0.248555	0.783639	1	1289	tags=24%, list=17%, signal=29%	-1.15073
BENPORATH_PROLIFERATION		64	0.314133	1.14989	0.201258	0.785289	1	1568	tags=28%, list=20%, signal=35%	-1.14989
PID_BMP_PATHWAY		15	0.456661	1.14892	0.25641	0.787641	1	1264	tags=27%, list=16%, signal=32%	-1.14892
AIYAR_COBRA1_TARGETS_DN		15	0.434202	1.14805	0.265625	0.789662	1	678	tags=27%, list=9%, signal=29%	-1.14805
LEE_LIVER_CANCER_MYC_TGFA_DN		22	0.394853	1.14776	0.247601	0.789287	1	89	tags=9%, list=1%, signal=9%	-1.14776
REACTOME_VISUAL_PHOTOTRANSDUCTION		41	0.343982	1.14722	0.226141	0.789791	1	2033	tags=46%, list=26%, signal=62%	-1.14722
NAKAMURA_ADIPOGENESIS_LATE_DN		21	0.411134	1.146	0.295858	0.792955	1	1314	tags=29%, list=17%, signal=34%	-1.146
REACTOME_SENSORY_PROCESSING_OF_SOUND		31	0.371052	1.14576	0.260692	0.792365	1	1911	tags=39%, list=25%, signal=51%	-1.14576
VANLOO_SP3_TARGETS_DN		40	0.346026	1.14568	0.227969	0.791116	1	1804	tags=40%, list=23%, signal=52%	-1.14568
GOZGIT_ESR1_TARGETS_DN		299	0.25507	1.14547	0.117083	0.790411	1	1575	tags=23%, list=20%, signal=27%	-1.14547
PID_PI3KCI_PATHWAY		24	0.386668	1.14529	0.255952	0.789591	1	2185	tags=46%, list=28%, signal=63%	-1.14529
NABA_ECM_REGULATORS		62	0.316257	1.14495	0.203156	0.789435	1	973	tags=19%, list=12%, signal=22%	-1.14495
FALVELLA_SMOKERS_WITH_LUNG_CANCER		41	0.341956	1.1449	0.256863	0.788094	1	698	tags=17%, list=9%, signal=19%	-1.1449
LIANG_HEMATOPOIESIS_STEM_CELL_NUMBER_LARGE_VS_TINY_DN		27	0.376535	1.14473	0.267045	0.787295	1	1956	tags=33%, list=25%, signal=44%	-1.14473
CHIARADONNA_NEOPLASTIC_TRANSFORMATION_KRAS_DN		56	0.327194	1.1445	0.214145	0.78676	1	1383	tags=23%, list=18%, signal=28%	-1.1445
SMITH_TERT_TARGETS_DN		51	0.32813	1.14416	0.236084	0.786579	1	1242	tags=29%, list=16%, signal=35%	-1.14416
WP_AMINO_ACID_METABOLISM		58	0.323174	1.14376	0.242545	0.786579	1	1698	tags=26%, list=22%, signal=33%	-1.14376
BIOCARTA_GH_PATHWAY		15	0.436792	1.1435	0.272727	0.786167	1	1888	tags=40%, list=24%, signal=53%	-1.1435
LIU_PROSTATE_CANCER_DN		207	0.265949	1.14092	0.150289	0.795011	1	792	tags=14%, list=10%, signal=16%	-1.14092
REACTOME_GLYCOSAMINOGLYCAN_METABOLISM		55	0.324489	1.13839	0.255906	0.803542	1	1067	tags=29%, list=14%, signal=33%	-1.13839
WP_ENERGY_METABOLISM		22	0.402828	1.13831	0.280808	0.802369	1	1460	tags=32%, list=19%, signal=39%	-1.13831
DELACROIX_RAR_BOUND_ES		191	0.266914	1.1378	0.192308	0.802823	1	1444	tags=21%, list=19%, signal=25%	-1.1378
SHIPP_DLBCL_VS_FOLLICULAR_LYMPHOMA_UP		27	0.380764	1.13715	0.27621	0.803794	1	1168	tags=26%, list=15%, signal=30%	-1.13715
JINESH_BLEBBISHIELD_TRANSFORMED_STEM_CELL_SPHERES_UP		76	0.304792	1.13702	0.219231	0.802798	1	1194	tags=24%, list=15%, signal=28%	-1.13702
CHIARADONNA_NEOPLASTIC_TRANSFORMATION_KRAS_CDC25_UP		28	0.373621	1.13661	0.250493	0.802924	1	777	tags=21%, list=10%, signal=24%	-1.13661
SHETH_LIVER_CANCER_VS_TXNIP_LOSS_PAM1		120	0.284699	1.1366	0.191781	0.801484	1	2090	tags=38%, list=27%, signal=52%	-1.1366
WP_RESISTIN_AS_A_REGULATOR_OF_INFLAMMATION		21	0.398077	1.13656	0.27451	0.80019	1	2200	tags=48%, list=28%, signal=66%	-1.13656
GALE_APL_WITH_FLT3_MUTATED_UP		34	0.35959	1.13626	0.259332	0.799914	1	1385	tags=29%, list=18%, signal=36%	-1.13626
PID_ERBB4_PATHWAY		17	0.418184	1.13606	0.298851	0.799186	1	792	tags=18%, list=10%, signal=20%	-1.13606
SANA_RESPONSE_TO_IFNG_UP		18	0.411843	1.13563	0.288462	0.799385	1	1674	tags=33%, list=21%, signal=42%	-1.13563
FONTAINE_FOLLICULAR_THYROID_ADENOMA_UP		37	0.341716	1.13553	0.241525	0.798261	1	1611	tags=32%, list=21%, signal=41%	-1.13553
REACTOME_SIGNALING_BY_FGFR3		20	0.408179	1.1349	0.283784	0.799328	1	2040	tags=40%, list=26%, signal=54%	-1.1349
WP_WNT_SIGNALING		40	0.339378	1.13379	0.275142	0.802402	1	2027	tags=40%, list=26%, signal=54%	-1.13379
MULLIGAN_NTF3_SIGNALING_VIA_INSR_AND_IGF1R_UP		15	0.437835	1.13352	0.284351	0.802025	1	1410	tags=33%, list=18%, signal=41%	-1.13352
TSENG_IRS1_TARGETS_DN		74	0.309469	1.1335	0.243083	0.800635	1	361	tags=12%, list=5%, signal=13%	-1.1335
FEVR_CTNNB1_TARGETS_UP		282	0.255429	1.13166	0.146067	0.806182	1	1235	tags=20%, list=16%, signal=23%	-1.13166
REACTOME_THROMBIN_SIGNALLING_THROUGH_PROTEINASE_ACTIVATED_RECEPTORS_PARS		16	0.413468	1.13151	0.284294	0.805346	1	1590	tags=44%, list=20%, signal=55%	-1.13151
REACTOME_CA2_PATHWAY		28	0.368255	1.13125	0.300191	0.804903	1	2033	tags=46%, list=26%, signal=63%	-1.13125
JINESH_BLEBBISHIELD_TO_IMMUNE_CELL_FUSION_PBSHMS_DN		147	0.271952	1.13123	0.189349	0.803479	1	1690	tags=29%, list=22%, signal=37%	-1.13123
MIKKELSEN_NPC_HCP_WITH_H3K4ME3_AND_H3K27ME3		72	0.306851	1.13075	0.228628	0.803917	1	1159	tags=21%, list=15%, signal=24%	-1.13075
JOHANSSON_GLIOMAGENESIS_BY_PDGFB_DN		17	0.419621	1.13002	0.283465	0.805441	1	441	tags=24%, list=6%, signal=25%	-1.13002
CHICAS_RB1_TARGETS_CONFLUENT		251	0.257762	1.12943	0.144231	0.806399	1	1956	tags=30%, list=25%, signal=39%	-1.12943
WP_CLEAR_CELL_RENAL_CELL_CARCINOMA_PATHWAYS		50	0.323007	1.12902	0.262931	0.806446	1	1574	tags=28%, list=20%, signal=35%	-1.12902
FLORIO_NEOCORTEX_BASAL_RADIAL_GLIA_UP		67	0.308916	1.12586	0.236742	0.817677	1	1652	tags=30%, list=21%, signal=38%	-1.12586
MATZUK_SPERMATID_DIFFERENTIATION		15	0.427588	1.12563	0.30064	0.817126	1	1318	tags=27%, list=17%, signal=32%	-1.12563
WP_NEUROINFLAMMATION_AND_GLUTAMATERGIC_SIGNALING		69	0.302474	1.12558	0.247899	0.815896	1	2039	tags=32%, list=26%, signal=43%	-1.12558
ZHAN_MULTIPLE_MYELOMA_CD1_AND_CD2_UP		49	0.327118	1.12557	0.24	0.814472	1	615	tags=16%, list=8%, signal=18%	-1.12557
NAKAYAMA_SOFT_TISSUE_TUMORS_PCA1_UP		24	0.383931	1.12556	0.28719	0.813042	1	1670	tags=46%, list=21%, signal=58%	-1.12556
BLANCO_MELO_RESPIRATORY_SYNCYTIAL_VIRUS_INFECTION_A594_CELLS_UP		69	0.304633	1.12509	0.227626	0.813447	1	1123	tags=19%, list=14%, signal=22%	-1.12509
REACTOME_TELOMERE_MAINTENANCE		41	0.335263	1.12432	0.251485	0.814919	1	1249	tags=27%, list=16%, signal=32%	-1.12432
JAEGER_METASTASIS_DN		69	0.303807	1.12372	0.25641	0.815796	1	1303	tags=22%, list=17%, signal=26%	-1.12372
BIOCARTA_PYK2_PATHWAY		16	0.42091	1.12239	0.301397	0.819708	1	1888	tags=31%, list=24%, signal=41%	-1.12239
BUYTAERT_PHOTODYNAMIC_THERAPY_STRESS_DN		302	0.247807	1.12164	0.134191	0.821328	1	1415	tags=24%, list=18%, signal=28%	-1.12164
CHIANG_LIVER_CANCER_SUBCLASS_POLYSOMY7_UP		24	0.376271	1.12151	0.282828	0.820379	1	1291	tags=33%, list=17%, signal=40%	-1.12151
REACTOME_MITOCHONDRIAL_FATTY_ACID_BETA_OXIDATION		28	0.363663	1.1214	0.28903	0.819388	1	1326	tags=25%, list=17%, signal=30%	-1.1214
REACTOME_GLYCOSPHINGOLIPID_METABOLISM		28	0.371576	1.12102	0.280808	0.81944	1	1567	tags=29%, list=20%, signal=36%	-1.12102
PID_P38_MKK3_6PATHWAY		17	0.417672	1.12086	0.313765	0.818638	1	1122	tags=29%, list=14%, signal=34%	-1.12086
WP_TGFBETA_SIGNALING_PATHWAY		70	0.303195	1.12035	0.242126	0.819213	1	1396	tags=24%, list=18%, signal=29%	-1.12035
LEE_RECENT_THYMIC_EMIGRANT		106	0.285137	1.11985	0.215415	0.819781	1	1579	tags=28%, list=20%, signal=35%	-1.11985
LEE_LIVER_CANCER_ACOX1_UP		27	0.365209	1.11906	0.289474	0.821574	1	386	tags=19%, list=5%, signal=19%	-1.11906
DARWICHE_PAPILLOMA_RISK_LOW_UP		78	0.299286	1.11903	0.227823	0.82024	1	1692	tags=32%, list=22%, signal=41%	-1.11903
LIEN_BREAST_CARCINOMA_METAPLASTIC_VS_DUCTAL_UP		26	0.370356	1.11717	0.274286	0.826059	1	911	tags=23%, list=12%, signal=26%	-1.11717
GEORGES_TARGETS_OF_MIR192_AND_MIR215		403	0.240746	1.11632	0.127971	0.827973	1	1559	tags=27%, list=20%, signal=31%	-1.11632
WAMUNYOKOLI_OVARIAN_CANCER_LMP_UP		125	0.273479	1.11555	0.20625	0.829645	1	971	tags=17%, list=12%, signal=19%	-1.11555
YOKOE_CANCER_TESTIS_ANTIGENS		16	0.414839	1.1148	0.294347	0.831072	1	2015	tags=44%, list=26%, signal=59%	-1.1148
KIM_ALL_DISORDERS_CALB1_CORR_UP		402	0.24251	1.11458	0.135189	0.830574	1	1337	tags=21%, list=17%, signal=24%	-1.11458
BRUINS_UVC_RESPONSE_VIA_TP53_GROUP_B		211	0.257167	1.11418	0.187023	0.830677	1	1935	tags=28%, list=25%, signal=37%	-1.11418
HATADA_METHYLATED_IN_LUNG_CANCER_UP		129	0.273928	1.11414	0.197154	0.82941	1	1259	tags=19%, list=16%, signal=23%	-1.11414
KEGG_AXON_GUIDANCE		66	0.306321	1.11292	0.254826	0.832714	1	980	tags=14%, list=13%, signal=15%	-1.11292
REACTOME_RETROGRADE_TRANSPORT_AT_THE_TRANS_GOLGI_NETWORK		39	0.332309	1.11224	0.289225	0.833955	1	2720	tags=51%, list=35%, signal=78%	-1.11224
SHETH_LIVER_CANCER_VS_TXNIP_LOSS_PAM4		137	0.272463	1.11152	0.227273	0.835358	1	1388	tags=23%, list=18%, signal=28%	-1.11152
ZHAN_MULTIPLE_MYELOMA_CD1_UP		15	0.425868	1.11128	0.309055	0.834746	1	1048	tags=33%, list=13%, signal=38%	-1.11128
WP_INTERLEUKIN11_SIGNALING_PATHWAY		22	0.386281	1.11093	0.302857	0.834703	1	2374	tags=41%, list=30%, signal=59%	-1.11093
PID_P75_NTR_PATHWAY		38	0.34472	1.11088	0.275154	0.833456	1	1030	tags=24%, list=13%, signal=27%	-1.11088
LIANG_HEMATOPOIESIS_STEM_CELL_NUMBER_SMALL_VS_HUGE_DN		16	0.41214	1.11086	0.312621	0.832133	1	1956	tags=50%, list=25%, signal=67%	-1.11086
GAL_LEUKEMIC_STEM_CELL_DN		66	0.309004	1.11042	0.272553	0.832516	1	1487	tags=29%, list=19%, signal=35%	-1.11042
LIN_NPAS4_TARGETS_UP		100	0.286304	1.1104	0.23327	0.83116	1	1419	tags=24%, list=18%, signal=29%	-1.1104
DURAND_STROMA_S_UP		121	0.274959	1.11032	0.242485	0.83007	1	850	tags=17%, list=11%, signal=19%	-1.11032
PEREZ_TP63_TARGETS		118	0.280709	1.10969	0.253036	0.831143	1	1198	tags=22%, list=15%, signal=26%	-1.10969
RIGGI_EWING_SARCOMA_PROGENITOR_UP		184	0.260845	1.10963	0.205534	0.82997	1	1073	tags=19%, list=14%, signal=22%	-1.10963
FONTAINE_PAPILLARY_THYROID_CARCINOMA_UP		31	0.35747	1.10959	0.2818	0.828746	1	1868	tags=42%, list=24%, signal=55%	-1.10959
REACTOME_SLC_MEDIATED_TRANSMEMBRANE_TRANSPORT		92	0.2861	1.10954	0.256311	0.827563	1	1340	tags=22%, list=17%, signal=26%	-1.10954
REACTOME_PLATELET_HOMEOSTASIS		46	0.328573	1.10922	0.271825	0.827408	1	2053	tags=43%, list=26%, signal=59%	-1.10922
PID_NFAT_3PATHWAY		30	0.363232	1.10853	0.295367	0.828739	1	1122	tags=37%, list=14%, signal=43%	-1.10853
HOSHIDA_LIVER_CANCER_SURVIVAL_UP		33	0.352815	1.10771	0.314991	0.830619	1	1318	tags=30%, list=17%, signal=36%	-1.10771
YEGNASUBRAMANIAN_PROSTATE_CANCER		49	0.32223	1.10731	0.27821	0.830839	1	1460	tags=31%, list=19%, signal=37%	-1.10731
OHGUCHI_LIVER_HNF4A_TARGETS_DN		39	0.333798	1.10672	0.286869	0.831851	1	1658	tags=31%, list=21%, signal=39%	-1.10672
WP_THYROID_HORMONES_PRODUCTION_AND_PERIPHERAL_DOWNSTREAM_SIGNALING_EFFECTS		43	0.331551	1.10659	0.320717	0.83097	1	2288	tags=42%, list=29%, signal=59%	-1.10659
SASSON_RESPONSE_TO_GONADOTROPHINS_DN		48	0.322708	1.10629	0.288802	0.830731	1	1531	tags=25%, list=20%, signal=31%	-1.10629
MEISSNER_NPC_HCP_WITH_H3K4ME2_AND_H3K27ME3		113	0.278938	1.10591	0.252466	0.830871	1	1943	tags=33%, list=25%, signal=43%	-1.10591
WU_SILENCED_BY_METHYLATION_IN_BLADDER_CANCER		21	0.385333	1.10579	0.296	0.829989	1	879	tags=24%, list=11%, signal=27%	-1.10579
ZHOU_INFLAMMATORY_RESPONSE_LIVE_DN		161	0.265748	1.10516	0.233766	0.831015	1	1122	tags=19%, list=14%, signal=21%	-1.10516
BOYAULT_LIVER_CANCER_SUBCLASS_G1_DN		23	0.375571	1.10511	0.296512	0.829841	1	2302	tags=48%, list=30%, signal=68%	-1.10511
REACTOME_G2_M_DNA_DAMAGE_CHECKPOINT		24	0.375441	1.1043	0.310204	0.831744	1	2115	tags=46%, list=27%, signal=63%	-1.1043
KEGG_GLIOMA		26	0.360569	1.10178	0.294355	0.840246	1	2996	tags=62%, list=38%, signal=100%	-1.10178
REACTOME_GLYCEROPHOSPHOLIPID_BIOSYNTHESIS		73	0.297301	1.10104	0.244618	0.841608	1	1836	tags=30%, list=24%, signal=39%	-1.10104
BOYAULT_LIVER_CANCER_SUBCLASS_G3_UP		129	0.27224	1.10076	0.238659	0.841374	1	1744	tags=31%, list=22%, signal=39%	-1.10076
REACTOME_DISEASES_OF_GLYCOSYLATION		52	0.317665	1.10062	0.291339	0.840516	1	1310	tags=29%, list=17%, signal=34%	-1.10062
CHIANG_LIVER_CANCER_SUBCLASS_UNANNOTATED_UP		40	0.334601	1.10037	0.311637	0.84005	1	893	tags=23%, list=11%, signal=25%	-1.10037
WP_EXERCISEINDUCED_CIRCADIAN_REGULATION		26	0.368528	1.09951	0.310078	0.842076	1	406	tags=15%, list=5%, signal=16%	-1.09951
LOCKWOOD_AMPLIFIED_IN_LUNG_CANCER		128	0.27464	1.09947	0.252941	0.84084	1	582	tags=12%, list=7%, signal=12%	-1.09947
WP_P53_TRANSCRIPTIONAL_GENE_NETWORK		36	0.340329	1.09937	0.301294	0.839844	1	1814	tags=31%, list=23%, signal=40%	-1.09937
BEIER_GLIOMA_STEM_CELL_DN		30	0.355802	1.09886	0.311111	0.840465	1	1731	tags=33%, list=22%, signal=43%	-1.09886
HOLLERN_EMT_BREAST_TUMOR_UP		66	0.303146	1.09836	0.28	0.841063	1	1113	tags=23%, list=14%, signal=26%	-1.09836
KEGG_DNA_REPLICATION		15	0.419134	1.09825	0.334004	0.840137	1	753	tags=27%, list=10%, signal=29%	-1.09825
REACTOME_REGULATION_OF_TP53_ACTIVITY_THROUGH_PHOSPHORYLATION		39	0.333936	1.09731	0.326693	0.842309	1	2174	tags=44%, list=28%, signal=60%	-1.09731
REACTOME_COSTIMULATION_BY_THE_CD28_FAMILY		26	0.363	1.09727	0.301205	0.841098	1	1881	tags=35%, list=24%, signal=45%	-1.09727
PID_ATF2_PATHWAY		18	0.395774	1.09715	0.31619	0.840265	1	1249	tags=33%, list=16%, signal=40%	-1.09715
BIOCARTA_DEATH_PATHWAY		19	0.387994	1.09707	0.324952	0.839196	1	1026	tags=21%, list=13%, signal=24%	-1.09707
LIU_OVARIAN_CANCER_TUMORS_AND_XENOGRAFTS_KINASES_DN		18	0.404394	1.09698	0.345114	0.838195	1	1029	tags=22%, list=13%, signal=26%	-1.09698
JINESH_BLEBBISHIELD_VS_LIVE_CONTROL_DN		123	0.273486	1.09572	0.270115	0.84182	1	1314	tags=24%, list=17%, signal=28%	-1.09572
HIRSCH_CELLULAR_TRANSFORMATION_SIGNATURE_UP		115	0.270818	1.09568	0.26306	0.840607	1	2080	tags=37%, list=27%, signal=49%	-1.09568
VECCHI_GASTRIC_CANCER_ADVANCED_VS_EARLY_UP		62	0.304754	1.0956	0.290722	0.839532	1	1336	tags=29%, list=17%, signal=35%	-1.0956
LIM_MAMMARY_STEM_CELL_DN		190	0.255481	1.09539	0.21	0.838983	1	1198	tags=16%, list=15%, signal=18%	-1.09539
KEGG_NEUROTROPHIN_SIGNALING_PATHWAY		63	0.302201	1.09466	0.274354	0.840555	1	1888	tags=32%, list=24%, signal=42%	-1.09466
KEGG_MTOR_SIGNALING_PATHWAY		30	0.354446	1.09402	0.302658	0.841738	1	1814	tags=37%, list=23%, signal=48%	-1.09402
WP_TH17_CELL_DIFFERENTIATION_PATHWAY		20	0.382745	1.09361	0.343195	0.841945	1	2374	tags=50%, list=30%, signal=72%	-1.09361
REACTOME_PINK1_PRKN_MEDIATED_MITOPHAGY		15	0.423104	1.09325	0.341463	0.841918	1	1844	tags=47%, list=24%, signal=61%	-1.09325
WP_BREAST_CANCER_PATHWAY		51	0.320923	1.09275	0.298419	0.842448	1	1680	tags=27%, list=22%, signal=35%	-1.09275
KEGG_JAK_STAT_SIGNALING_PATHWAY		32	0.34164	1.09252	0.319392	0.842064	1	2039	tags=34%, list=26%, signal=46%	-1.09252
TURASHVILI_BREAST_LOBULAR_CARCINOMA_VS_LOBULAR_NORMAL_DN		29	0.349305	1.09131	0.326489	0.845344	1	1138	tags=28%, list=15%, signal=32%	-1.09131
BOYLAN_MULTIPLE_MYELOMA_D_CLUSTER_DN		18	0.392953	1.09034	0.327451	0.847871	1	1205	tags=22%, list=15%, signal=26%	-1.09034
REACTOME_SYNTHESIS_OF_IP3_AND_IP4_IN_THE_CYTOSOL		17	0.401504	1.09012	0.358607	0.847363	1	2200	tags=53%, list=28%, signal=74%	-1.09012
NUTT_GBM_VS_AO_GLIOMA_UP		32	0.346154	1.09	0.338491	0.846471	1	1358	tags=31%, list=17%, signal=38%	-1.09
WP_EGFR_TYROSINE_KINASE_INHIBITOR_RESISTANCE		45	0.320103	1.08958	0.327553	0.846876	1	1013	tags=22%, list=13%, signal=25%	-1.08958
WP_DYRK1A		33	0.346466	1.08895	0.310891	0.847985	1	1300	tags=27%, list=17%, signal=33%	-1.08895
KEGG_PORPHYRIN_AND_CHLOROPHYLL_METABOLISM		18	0.403445	1.08858	0.342857	0.848151	1	2056	tags=39%, list=26%, signal=53%	-1.08858
FORTSCHEGGER_PHF8_TARGETS_DN		388	0.237238	1.08858	0.194553	0.846828	1	1570	tags=24%, list=20%, signal=29%	-1.08858
SANSOM_APC_TARGETS_REQUIRE_MYC		120	0.273933	1.08811	0.287671	0.847391	1	1365	tags=24%, list=18%, signal=29%	-1.08811
JOHANSSON_BRAIN_CANCER_EARLY_VS_LATE_DN		33	0.344529	1.08797	0.319502	0.846647	1	1337	tags=33%, list=17%, signal=40%	-1.08797
LI_INDUCED_T_TO_NATURAL_KILLER_UP		111	0.275183	1.08797	0.279026	0.845342	1	2016	tags=32%, list=26%, signal=43%	-1.08797
REACTOME_MTORC1_MEDIATED_SIGNALLING		18	0.399129	1.08785	0.364	0.844497	1	671	tags=22%, list=9%, signal=24%	-1.08785
BOYLAN_MULTIPLE_MYELOMA_C_D_DN		102	0.28122	1.08775	0.266402	0.843524	1	1250	tags=25%, list=16%, signal=29%	-1.08775
SHETH_LIVER_CANCER_VS_TXNIP_LOSS_PAM5		42	0.329525	1.0867	0.308765	0.846311	1	1337	tags=26%, list=17%, signal=31%	-1.0867
GARGALOVIC_RESPONSE_TO_OXIDIZED_PHOSPHOLIPIDS_BLUE_UP		50	0.317354	1.08663	0.304015	0.845293	1	1116	tags=22%, list=14%, signal=26%	-1.08663
REACTOME_TRAF6_MEDIATED_NF_KB_ACTIVATION		15	0.415363	1.08638	0.35041	0.844943	1	1016	tags=33%, list=13%, signal=38%	-1.08638
LIM_MAMMARY_LUMINAL_MATURE_DN		44	0.322206	1.08556	0.311663	0.846899	1	599	tags=14%, list=8%, signal=15%	-1.08556
YAGI_AML_WITH_T_8_21_TRANSLOCATION		179	0.255842	1.08547	0.246377	0.845916	1	2152	tags=34%, list=28%, signal=45%	-1.08547
REACTOME_SIGNALING_BY_THE_B_CELL_RECEPTOR_BCR		76	0.288729	1.08501	0.273622	0.846437	1	1677	tags=29%, list=22%, signal=37%	-1.08501
PID_RHOA_PATHWAY		27	0.357475	1.0842	0.333333	0.848298	1	717	tags=19%, list=9%, signal=20%	-1.0842
SENESE_HDAC3_TARGETS_UP		243	0.247532	1.08407	0.226843	0.847501	1	1590	tags=25%, list=20%, signal=30%	-1.08407
WP_APOPTOSISRELATED_NETWORK_DUE_TO_ALTERED_NOTCH3_IN_OVARIAN_CANCER		25	0.36063	1.08354	0.351129	0.848206	1	425	tags=16%, list=5%, signal=17%	-1.08354
MACAEVA_PBMC_RESPONSE_TO_IR		39	0.324792	1.08282	0.302913	0.849682	1	780	tags=15%, list=10%, signal=17%	-1.08282
REACTOME_ION_CHANNEL_TRANSPORT		78	0.287399	1.08263	0.320683	0.849118	1	1819	tags=29%, list=23%, signal=38%	-1.08263
REACTOME_OVARIAN_TUMOR_DOMAIN_PROTEASES		20	0.378465	1.08222	0.334	0.849348	1	2135	tags=40%, list=27%, signal=55%	-1.08222
RASHI_RESPONSE_TO_IONIZING_RADIATION_3		30	0.351164	1.08199	0.334586	0.84897	1	1118	tags=33%, list=14%, signal=39%	-1.08199
ZWANG_TRANSIENTLY_UP_BY_2ND_EGF_PULSE_ONLY		371	0.236971	1.08198	0.206963	0.84772	1	1600	tags=24%, list=21%, signal=29%	-1.08198
REACTOME_TRNA_MODIFICATION_IN_THE_NUCLEUS_AND_CYTOSOL		29	0.352707	1.08176	0.333333	0.847305	1	1014	tags=21%, list=13%, signal=24%	-1.08176
REACTOME_ANCHORING_OF_THE_BASAL_BODY_TO_THE_PLASMA_MEMBRANE		41	0.322099	1.08133	0.318458	0.847646	1	1450	tags=32%, list=19%, signal=39%	-1.08133
KEGG_VEGF_SIGNALING_PATHWAY		31	0.345002	1.08119	0.348315	0.846894	1	2002	tags=42%, list=26%, signal=56%	-1.08119
COWLING_MYCN_TARGETS		16	0.40884	1.08065	0.382812	0.847785	1	591	tags=19%, list=8%, signal=20%	-1.08065
REACTOME_L1CAM_INTERACTIONS		62	0.296956	1.08065	0.312734	0.846528	1	1314	tags=24%, list=17%, signal=29%	-1.08065
REACTOME_ORGANELLE_BIOGENESIS_AND_MAINTENANCE		150	0.266073	1.07952	0.277132	0.849584	1	1467	tags=26%, list=19%, signal=31%	-1.07952
NAKAMURA_ADIPOGENESIS_LATE_UP		45	0.32038	1.07947	0.316929	0.848498	1	2205	tags=36%, list=28%, signal=49%	-1.07947
PANGAS_TUMOR_SUPPRESSION_BY_SMAD1_AND_SMAD5_DN		69	0.297708	1.07882	0.326087	0.849781	1	1575	tags=28%, list=20%, signal=34%	-1.07882
KATSANOU_ELAVL1_TARGETS_UP		59	0.300988	1.07836	0.307985	0.850353	1	707	tags=12%, list=9%, signal=13%	-1.07836
WP_REGULATION_OF_ACTIN_CYTOSKELETON		75	0.290802	1.07823	0.302187	0.84959	1	1013	tags=20%, list=13%, signal=23%	-1.07823
ELVIDGE_HIF1A_TARGETS_DN		36	0.335725	1.07798	0.350305	0.849305	1	1917	tags=42%, list=25%, signal=55%	-1.07798
REACTOME_INTRINSIC_PATHWAY_FOR_APOPTOSIS		23	0.367672	1.07796	0.339806	0.848096	1	980	tags=26%, list=13%, signal=30%	-1.07796
MITSIADES_RESPONSE_TO_APLIDIN_UP		183	0.252955	1.07738	0.247059	0.849068	1	1232	tags=19%, list=16%, signal=22%	-1.07738
REACTOME_SULFUR_AMINO_ACID_METABOLISM		20	0.379009	1.07718	0.347409	0.848617	1	1115	tags=30%, list=14%, signal=35%	-1.07718
MCBRYAN_PUBERTAL_BREAST_3_4WK_UP		84	0.284658	1.0769	0.313492	0.848435	1	1611	tags=24%, list=21%, signal=30%	-1.0769
WANG_RESPONSE_TO_GSK3_INHIBITOR_SB216763_DN		169	0.256873	1.0765	0.299803	0.848745	1	1285	tags=24%, list=16%, signal=28%	-1.0765
REACTOME_ANTIGEN_PROCESSING_UBIQUITINATION_PROTEASOME_DEGRADATION		192	0.254389	1.07616	0.267528	0.848776	1	1436	tags=24%, list=18%, signal=29%	-1.07616
SONG_TARGETS_OF_IE86_CMV_PROTEIN		22	0.368702	1.07602	0.335366	0.848064	1	1460	tags=27%, list=19%, signal=33%	-1.07602
PID_TGFBR_PATHWAY		34	0.33442	1.07602	0.349495	0.846831	1	1954	tags=38%, list=25%, signal=51%	-1.07602
PHONG_TNF_RESPONSE_VIA_P38_PARTIAL		61	0.296988	1.0756	0.307102	0.847195	1	1841	tags=31%, list=24%, signal=40%	-1.0756
GARCIA_TARGETS_OF_FLI1_AND_DAX1_UP		25	0.359573	1.07534	0.333977	0.846884	1	820	tags=20%, list=11%, signal=22%	-1.07534
NIKOLSKY_BREAST_CANCER_20Q11_AMPLICON		19	0.389298	1.07507	0.367308	0.846714	1	2675	tags=47%, list=34%, signal=72%	-1.07507
HOFMANN_CELL_LYMPHOMA_UP		15	0.401276	1.07389	0.362205	0.849969	1	1649	tags=40%, list=21%, signal=51%	-1.07389
REACTOME_ECM_PROTEOGLYCANS		39	0.330189	1.07364	0.344758	0.849668	1	1867	tags=41%, list=24%, signal=54%	-1.07364
KEGG_GNRH_SIGNALING_PATHWAY		39	0.326905	1.07331	0.366795	0.849739	1	1983	tags=33%, list=25%, signal=44%	-1.07331
REACTOME_REGULATION_OF_PTEN_STABILITY_AND_ACTIVITY		54	0.306628	1.07301	0.330097	0.849657	1	1677	tags=30%, list=22%, signal=37%	-1.07301
TURASHVILI_BREAST_LOBULAR_CARCINOMA_VS_DUCTAL_NORMAL_DN		32	0.339068	1.07248	0.327309	0.850507	1	1094	tags=19%, list=14%, signal=22%	-1.07248
WP_VITAMIN_B12_METABOLISM		23	0.368779	1.07207	0.360489	0.850845	1	924	tags=26%, list=12%, signal=30%	-1.07207
CLASPER_LYMPHATIC_VESSELS_DURING_METASTASIS_DN		15	0.415048	1.07179	0.355289	0.850641	1	2150	tags=40%, list=28%, signal=55%	-1.07179
CROMER_METASTASIS_DN		38	0.326269	1.07052	0.338614	0.854216	1	1970	tags=34%, list=25%, signal=46%	-1.07052
MATZUK_SPERMATOCYTE		24	0.36784	1.0696	0.356164	0.856489	1	668	tags=17%, list=9%, signal=18%	-1.0696
DARWICHE_SKIN_TUMOR_PROMOTER_UP		69	0.290008	1.06841	0.318008	0.859886	1	1366	tags=25%, list=18%, signal=30%	-1.06841
REACTOME_METABOLISM_OF_NUCLEOTIDES		68	0.291138	1.06819	0.323364	0.859491	1	2243	tags=43%, list=29%, signal=59%	-1.06819
BLUM_RESPONSE_TO_SALIRASIB_UP		140	0.260082	1.06803	0.288845	0.858812	1	1038	tags=18%, list=13%, signal=20%	-1.06803
REACTOME_DEGRADATION_OF_BETA_CATENIN_BY_THE_DESTRUCTION_COMPLEX		58	0.300738	1.06692	0.325773	0.861801	1	2027	tags=40%, list=26%, signal=53%	-1.06692
WP_FRAGILE_X_SYNDROME		90	0.280886	1.06648	0.315068	0.862312	1	2132	tags=33%, list=27%, signal=45%	-1.06648
REACTOME_METABOLISM_OF_CARBOHYDRATES		154	0.259086	1.06555	0.311111	0.864573	1	1125	tags=21%, list=14%, signal=24%	-1.06555
TONKS_TARGETS_OF_RUNX1_RUNX1T1_FUSION_HSC_DN		65	0.29378	1.06508	0.335283	0.865157	1	856	tags=17%, list=11%, signal=19%	-1.06508
COATES_MACROPHAGE_M1_VS_M2_DN		30	0.344933	1.06504	0.383858	0.864064	1	534	tags=13%, list=7%, signal=14%	-1.06504
PID_LYSOPHOSPHOLIPID_PATHWAY		41	0.319242	1.06498	0.372277	0.863035	1	2016	tags=34%, list=26%, signal=46%	-1.06498
CHAUHAN_RESPONSE_TO_METHOXYESTRADIOL_DN		56	0.298289	1.06406	0.335922	0.865273	1	1064	tags=20%, list=14%, signal=23%	-1.06406
REACTOME_PROTEIN_PROTEIN_INTERACTIONS_AT_SYNAPSES		52	0.306696	1.06406	0.358121	0.864045	1	679	tags=15%, list=9%, signal=17%	-1.06406
JINESH_BLEBBISHIELD_TO_IMMUNE_CELL_FUSION_PBSHMS_UP		183	0.249214	1.06367	0.275665	0.864301	1	1954	tags=31%, list=25%, signal=41%	-1.06367
MUNSHI_MULTIPLE_MYELOMA_UP		33	0.338278	1.06361	0.370937	0.86331	1	972	tags=21%, list=12%, signal=24%	-1.06361
MEISSNER_NPC_HCP_WITH_H3K4ME3_AND_H3K27ME3		56	0.303468	1.06201	0.3361	0.868155	1	1344	tags=23%, list=17%, signal=28%	-1.06201
WP_GASTRIN_SIGNALING_PATHWAY		62	0.297144	1.06201	0.319361	0.866929	1	2016	tags=37%, list=26%, signal=50%	-1.06201
TAKEDA_TARGETS_OF_NUP98_HOXA9_FUSION_16D_UP		49	0.30768	1.06179	0.359259	0.866551	1	1558	tags=20%, list=20%, signal=25%	-1.06179
SEMENZA_HIF1_TARGETS		18	0.392321	1.06155	0.370155	0.866238	1	1095	tags=33%, list=14%, signal=39%	-1.06155
ODONNELL_TFRC_TARGETS_UP		114	0.263429	1.06148	0.318533	0.865247	1	1596	tags=26%, list=20%, signal=33%	-1.06148
SABATES_COLORECTAL_ADENOMA_DN		97	0.272282	1.06129	0.333333	0.864749	1	1456	tags=22%, list=19%, signal=26%	-1.06129
WIERENGA_STAT5A_TARGETS_GROUP2		15	0.404622	1.06118	0.371486	0.863924	1	1880	tags=60%, list=24%, signal=79%	-1.06118
OISHI_CHOLANGIOMA_STEM_CELL_LIKE_DN		108	0.265464	1.06054	0.323755	0.86509	1	1561	tags=29%, list=20%, signal=35%	-1.06054
BLANCO_MELO_MERS_COV_INFECTION_MCR5_CELLS_UP		64	0.297407	1.06049	0.35206	0.864073	1	1911	tags=27%, list=25%, signal=35%	-1.06049
KRIEG_KDM3A_TARGETS_NOT_HYPOXIA		111	0.268117	1.06014	0.30303	0.864233	1	1712	tags=29%, list=22%, signal=36%	-1.06014
REACTOME_SIGNALING_BY_HEDGEHOG		90	0.277871	1.05981	0.341651	0.864292	1	1579	tags=32%, list=20%, signal=40%	-1.05981
IBRAHIM_NRF2_DOWN		61	0.298544	1.05934	0.356998	0.864873	1	771	tags=16%, list=10%, signal=18%	-1.05934
REACTOME_RHO_GTPASES_ACTIVATE_WASPS_AND_WAVES		26	0.350242	1.05933	0.391137	0.863732	1	2868	tags=54%, list=37%, signal=85%	-1.05933
LINDGREN_BLADDER_CANCER_CLUSTER_2B		152	0.252963	1.0589	0.312618	0.86414	1	1612	tags=25%, list=21%, signal=31%	-1.0589
KAN_RESPONSE_TO_ARSENIC_TRIOXIDE		47	0.308748	1.0583	0.379798	0.865208	1	1166	tags=23%, list=15%, signal=27%	-1.0583
KEGG_PROGESTERONE_MEDIATED_OOCYTE_MATURATION		36	0.328255	1.05719	0.349802	0.868238	1	1680	tags=28%, list=22%, signal=35%	-1.05719
PID_HEDGEHOG_GLI_PATHWAY		23	0.360051	1.05609	0.405567	0.871209	1	1751	tags=39%, list=22%, signal=50%	-1.05609
SEIDEN_ONCOGENESIS_BY_MET		60	0.298425	1.0554	0.362745	0.872593	1	1651	tags=32%, list=21%, signal=40%	-1.0554
ZHAN_MULTIPLE_MYELOMA_CD2_DN		27	0.352856	1.05492	0.369781	0.873191	1	2243	tags=56%, list=29%, signal=78%	-1.05492
PASINI_SUZ12_TARGETS_UP		41	0.320813	1.05488	0.357724	0.872133	1	2563	tags=54%, list=33%, signal=79%	-1.05488
REACTOME_DISEASES_OF_CARBOHYDRATE_METABOLISM		17	0.388566	1.05417	0.361493	0.873596	1	2375	tags=47%, list=30%, signal=68%	-1.05417
REACTOME_DNA_DAMAGE_BYPASS		27	0.358738	1.05334	0.385214	0.875583	1	953	tags=19%, list=12%, signal=21%	-1.05334
JAATINEN_HEMATOPOIETIC_STEM_CELL_DN		67	0.288091	1.05317	0.354406	0.875015	1	680	tags=15%, list=9%, signal=16%	-1.05317
BROWNE_HCMV_INFECTION_18HR_DN		84	0.276394	1.05309	0.342105	0.874138	1	1034	tags=21%, list=13%, signal=24%	-1.05309
UDAYAKUMAR_MED1_TARGETS_UP		88	0.27877	1.05293	0.340681	0.873535	1	1263	tags=24%, list=16%, signal=28%	-1.05293
HELLER_HDAC_TARGETS_DN		135	0.261036	1.05247	0.332692	0.874151	1	1165	tags=19%, list=15%, signal=21%	-1.05247
AMIT_EGF_RESPONSE_60_HELA		20	0.37289	1.05246	0.368522	0.872994	1	865	tags=20%, list=11%, signal=22%	-1.05246
MEISSNER_NPC_HCP_WITH_H3K4ME2		191	0.246045	1.05195	0.313093	0.873758	1	1529	tags=20%, list=20%, signal=25%	-1.05195
CORRE_MULTIPLE_MYELOMA_UP		28	0.343466	1.05177	0.380952	0.873277	1	1819	tags=39%, list=23%, signal=51%	-1.05177
REACTOME_NEGATIVE_REGULATORS_OF_DDX58_IFIH1_SIGNALING		21	0.36472	1.05177	0.389899	0.872087	1	726	tags=19%, list=9%, signal=21%	-1.05177
LEE_BMP2_TARGETS_UP		331	0.235251	1.05132	0.304598	0.872647	1	1702	tags=24%, list=22%, signal=30%	-1.05132
KORKOLA_EMBRYONAL_CARCINOMA_UP		18	0.385319	1.05093	0.387629	0.872958	1	1708	tags=44%, list=22%, signal=57%	-1.05093
KEGG_LEISHMANIA_INFECTION		26	0.345672	1.05047	0.378882	0.873434	1	1137	tags=31%, list=15%, signal=36%	-1.05047
POMEROY_MEDULLOBLASTOMA_DESMOPLASIC_VS_CLASSIC_UP		36	0.322607	1.05046	0.388781	0.872274	1	1220	tags=25%, list=16%, signal=29%	-1.05046
BLANCO_MELO_BRONCHIAL_EPITHELIAL_CELLS_INFLUENZA_A_INFECTION_UP		56	0.299642	1.05025	0.364356	0.871937	1	1158	tags=27%, list=15%, signal=31%	-1.05025
REACTOME_PI3K_AKT_SIGNALING_IN_CANCER		43	0.316898	1.05018	0.367424	0.871009	1	890	tags=16%, list=11%, signal=18%	-1.05018
AMIT_EGF_RESPONSE_120_HELA		27	0.346695	1.04971	0.366667	0.871576	1	863	tags=26%, list=11%, signal=29%	-1.04971
BIOCARTA_FCER1_PATHWAY		19	0.380465	1.0496	0.36699	0.870829	1	1888	tags=42%, list=24%, signal=55%	-1.0496
REACTOME_EPH_EPHRIN_MEDIATED_REPULSION_OF_CELLS		24	0.354047	1.04953	0.379576	0.869936	1	1015	tags=25%, list=13%, signal=29%	-1.04953
WANG_TUMOR_INVASIVENESS_DN		129	0.25958	1.04872	0.330078	0.871744	1	1255	tags=24%, list=16%, signal=28%	-1.04872
REACTOME_KERATINIZATION		15	0.398753	1.04844	0.393762	0.871664	1	1072	tags=33%, list=14%, signal=39%	-1.04844
DESERT_PERIVENOUS_HEPATOCELLULAR_CARCINOMA_SUBCLASS_UP		91	0.271241	1.04835	0.341373	0.870856	1	1672	tags=25%, list=21%, signal=32%	-1.04835
REACTOME_KERATAN_SULFATE_KERATIN_METABOLISM		16	0.390915	1.04805	0.389734	0.8708	1	1887	tags=56%, list=24%, signal=74%	-1.04805
RAO_BOUND_BY_SALL4_ISOFORM_B		240	0.238073	1.04733	0.306202	0.872413	1	1520	tags=23%, list=19%, signal=28%	-1.04733
ACOSTA_PROLIFERATION_INDEPENDENT_MYC_TARGETS_DN		52	0.299033	1.0468	0.360784	0.873307	1	744	tags=15%, list=10%, signal=17%	-1.0468
REACTOME_MITOCHONDRIAL_BIOGENESIS		47	0.303134	1.04668	0.37451	0.872609	1	1122	tags=19%, list=14%, signal=22%	-1.04668
LEIN_MEDULLA_MARKERS		30	0.336305	1.04658	0.362745	0.871818	1	566	tags=17%, list=7%, signal=18%	-1.04658
REACTOME_COPI_DEPENDENT_GOLGI_TO_ER_RETROGRADE_TRAFFIC		42	0.317152	1.04616	0.381443	0.872188	1	1423	tags=24%, list=18%, signal=29%	-1.04616
ROYLANCE_BREAST_CANCER_16Q_COPY_NUMBER_UP		31	0.338383	1.04565	0.386617	0.87285	1	630	tags=26%, list=8%, signal=28%	-1.04565
REACTOME_FORMATION_OF_THE_CORNIFIED_ENVELOPE		15	0.398753	1.04478	0.40873	0.874962	1	1072	tags=33%, list=14%, signal=39%	-1.04478
LI_WILMS_TUMOR_VS_FETAL_KIDNEY_1_UP		93	0.26871	1.04353	0.373796	0.878579	1	971	tags=17%, list=12%, signal=19%	-1.04353
REACTOME_COOPERATION_OF_PDCL_PHLP1_AND_TRIC_CCT_IN_G_PROTEIN_BETA_FOLDING		24	0.354997	1.04267	0.405242	0.880662	1	2391	tags=63%, list=31%, signal=90%	-1.04267
TURASHVILI_BREAST_DUCTAL_CARCINOMA_VS_LOBULAR_NORMAL_DN		23	0.356857	1.04236	0.410985	0.880684	1	1057	tags=22%, list=14%, signal=25%	-1.04236
REACTOME_SIGNALING_BY_INTERLEUKINS		195	0.243847	1.0419	0.332117	0.881215	1	1579	tags=25%, list=20%, signal=30%	-1.0419
WP_MELANOMA		28	0.34469	1.04164	0.39645	0.881017	1	1013	tags=18%, list=13%, signal=20%	-1.04164
BROWNE_HCMV_INFECTION_30MIN_UP		21	0.364117	1.0414	0.39759	0.88074	1	924	tags=24%, list=12%, signal=27%	-1.0414
STEIN_ESRRA_TARGETS_RESPONSIVE_TO_ESTROGEN_DN		16	0.385007	1.04121	0.385797	0.880331	1	1113	tags=44%, list=14%, signal=51%	-1.04121
YANG_BCL3_TARGETS_UP		137	0.256427	1.0412	0.381404	0.879202	1	943	tags=16%, list=12%, signal=18%	-1.0412
MULLIGHAN_NPM1_SIGNATURE_3_DN		90	0.271146	1.04063	0.353057	0.880216	1	1669	tags=28%, list=21%, signal=35%	-1.04063
REACTOME_SWITCHING_OF_ORIGINS_TO_A_POST_REPLICATIVE_STATE		58	0.292664	1.04045	0.383721	0.879774	1	1677	tags=31%, list=22%, signal=39%	-1.04045
LEE_LIVER_CANCER_MYC_TGFA_UP		25	0.360178	1.04028	0.39313	0.879248	1	791	tags=20%, list=10%, signal=22%	-1.04028
SAFFORD_T_LYMPHOCYTE_ANERGY		33	0.326771	1.04017	0.395582	0.878517	1	1253	tags=27%, list=16%, signal=32%	-1.04017
PID_INTEGRIN3_PATHWAY		26	0.347688	1.0401	0.40381	0.877645	1	810	tags=27%, list=10%, signal=30%	-1.0401
KEGG_REGULATION_OF_ACTIN_CYTOSKELETON		104	0.26312	1.04009	0.372439	0.876528	1	1903	tags=31%, list=24%, signal=40%	-1.04009
REACTOME_INSULIN_PROCESSING		17	0.387427	1.03971	0.392	0.87683	1	11	tags=6%, list=0%, signal=6%	-1.03971
QI_PLASMACYTOMA_UP		87	0.2699	1.03942	0.357955	0.876772	1	1639	tags=30%, list=21%, signal=37%	-1.03942
WP_FOCAL_ADHESION_PI3KAKTMTORSIGNALING_PATHWAY		132	0.255266	1.03857	0.359918	0.878904	1	1896	tags=30%, list=24%, signal=39%	-1.03857
REACTOME_NEGATIVE_REGULATION_OF_NOTCH4_SIGNALING		42	0.313503	1.03815	0.40824	0.879389	1	1677	tags=36%, list=22%, signal=45%	-1.03815
CUI_TCF21_TARGETS_UP		21	0.368673	1.03799	0.395112	0.878824	1	2428	tags=43%, list=31%, signal=62%	-1.03799
KEGG_ALANINE_ASPARTATE_AND_GLUTAMATE_METABOLISM		22	0.365125	1.03758	0.393346	0.879278	1	1683	tags=36%, list=22%, signal=46%	-1.03758
SIG_CHEMOTAXIS		26	0.35181	1.03757	0.384314	0.878183	1	2796	tags=58%, list=36%, signal=90%	-1.03757
STAMBOLSKY_RESPONSE_TO_VITAMIN_D3_UP		35	0.327632	1.03749	0.389222	0.877341	1	2347	tags=49%, list=30%, signal=69%	-1.03749
RICKMAN_TUMOR_DIFFERENTIATED_WELL_VS_POORLY_DN		169	0.247892	1.03741	0.363465	0.876508	1	1692	tags=27%, list=22%, signal=33%	-1.03741
MANALO_HYPOXIA_DN		171	0.244068	1.03732	0.358318	0.875745	1	1477	tags=23%, list=19%, signal=28%	-1.03732
ROSS_ACUTE_MYELOID_LEUKEMIA_CBF		29	0.33678	1.03646	0.403409	0.877707	1	1889	tags=45%, list=24%, signal=59%	-1.03646
WP_GABA_RECEPTOR_SIGNALING		19	0.385699	1.03627	0.416016	0.87731	1	1015	tags=32%, list=13%, signal=36%	-1.03627
VANTVEER_BREAST_CANCER_POOR_PROGNOSIS		20	0.371071	1.03584	0.401623	0.877727	1	748	tags=25%, list=10%, signal=28%	-1.03584
REACTOME_PEPTIDE_HORMONE_METABOLISM		37	0.318768	1.03568	0.406615	0.87723	1	1640	tags=24%, list=21%, signal=31%	-1.03568
MARKEY_RB1_ACUTE_LOF_DN		98	0.267887	1.03564	0.375235	0.87627	1	1285	tags=21%, list=16%, signal=25%	-1.03564
WP_CHEMOKINE_SIGNALING_PATHWAY		75	0.274858	1.03528	0.377649	0.876517	1	2033	tags=36%, list=26%, signal=48%	-1.03528
WANG_ESOPHAGUS_CANCER_VS_NORMAL_UP		51	0.297011	1.03509	0.366412	0.876109	1	2205	tags=41%, list=28%, signal=57%	-1.03509
MIKKELSEN_ES_ICP_WITH_H3K4ME3		255	0.234331	1.03504	0.333984	0.875162	1	1716	tags=24%, list=22%, signal=30%	-1.03504
REACTOME_DNA_REPLICATION		73	0.280867	1.03366	0.386139	0.879255	1	1579	tags=27%, list=20%, signal=34%	-1.03366
MEISSNER_BRAIN_ICP_WITH_H3K4ME3		15	0.396054	1.03358	0.415205	0.87843	1	773	tags=20%, list=10%, signal=22%	-1.03358
KRIGE_RESPONSE_TO_TOSEDOSTAT_24HR_UP		334	0.226208	1.03358	0.341865	0.877319	1	1402	tags=21%, list=18%, signal=24%	-1.03358
RAMALHO_STEMNESS_UP		128	0.252394	1.03329	0.382671	0.877237	1	1077	tags=19%, list=14%, signal=21%	-1.03329
REACTOME_APC_C_MEDIATED_DEGRADATION_OF_CELL_CYCLE_PROTEINS		58	0.288362	1.03286	0.383838	0.877627	1	1677	tags=31%, list=22%, signal=39%	-1.03286
REACTOME_NUCLEAR_EVENTS_MEDIATED_BY_NFE2L2		57	0.293809	1.03273	0.391389	0.877018	1	1723	tags=33%, list=22%, signal=42%	-1.03273
RODWELL_AGING_KIDNEY_UP		215	0.236987	1.03225	0.383895	0.877626	1	1118	tags=18%, list=14%, signal=20%	-1.03225
HOQUE_METHYLATED_IN_CANCER		21	0.36376	1.03202	0.390291	0.877356	1	879	tags=19%, list=11%, signal=21%	-1.03202
DE_YY1_TARGETS_DN		51	0.300469	1.03199	0.391137	0.876344	1	1357	tags=29%, list=17%, signal=35%	-1.03199
REACTOME_TRANSPORT_OF_INORGANIC_CATIONS_ANIONS_AND_AMINO_ACIDS_OLIGOPEPTIDES		42	0.309708	1.03148	0.404382	0.877035	1	1495	tags=24%, list=19%, signal=29%	-1.03148
WANG_SMARCE1_TARGETS_UP		123	0.256296	1.03088	0.381404	0.878102	1	970	tags=20%, list=12%, signal=22%	-1.03088
BURTON_ADIPOGENESIS_8		44	0.305556	1.03084	0.37577	0.87712	1	1314	tags=27%, list=17%, signal=33%	-1.03084
PID_AURORA_B_PATHWAY		17	0.380979	1.02955	0.41556	0.880678	1	410	tags=12%, list=5%, signal=12%	-1.02955
FULCHER_INFLAMMATORY_RESPONSE_LECTIN_VS_LPS_UP		275	0.229677	1.02913	0.331349	0.881099	1	1287	tags=20%, list=17%, signal=23%	-1.02913
NAKAMURA_CANCER_MICROENVIRONMENT_DN		25	0.348551	1.02866	0.415414	0.88179	1	2114	tags=36%, list=27%, signal=49%	-1.02866
BRUINS_UVC_RESPONSE_VIA_TP53_GROUP_A		368	0.224979	1.02859	0.363636	0.880916	1	1341	tags=20%, list=17%, signal=23%	-1.02859
REACTOME_TRANSPORT_OF_SMALL_MOLECULES		340	0.223842	1.02757	0.354125	0.883723	1	1966	tags=28%, list=25%, signal=36%	-1.02757
REACTOME_DISEASES_OF_SIGNAL_TRANSDUCTION_BY_GROWTH_FACTOR_RECEPTORS_AND_SECOND_MESSENGERS		248	0.234806	1.0268	0.381783	0.885483	1	1890	tags=30%, list=24%, signal=38%	-1.0268
REACTOME_CHROMOSOME_MAINTENANCE		47	0.297918	1.02658	0.390963	0.885168	1	1249	tags=26%, list=16%, signal=30%	-1.02658
ALCALAY_AML_BY_NPM1_LOCALIZATION_DN		81	0.271916	1.02611	0.406593	0.885943	1	2541	tags=48%, list=33%, signal=71%	-1.02611
WP_METHIONINE_DE_NOVO_AND_SALVAGE_PATHWAY		15	0.400419	1.0258	0.420523	0.885911	1	1028	tags=27%, list=13%, signal=31%	-1.0258
PURBEY_TARGETS_OF_CTBP1_NOT_SATB1_UP		146	0.25233	1.0258	0.393822	0.884836	1	1141	tags=18%, list=15%, signal=20%	-1.0258
REACTOME_HEPARAN_SULFATE_HEPARIN_HS_GAG_METABOLISM		29	0.331266	1.02483	0.402806	0.887339	1	1067	tags=31%, list=14%, signal=36%	-1.02483
ACEVEDO_METHYLATED_IN_LIVER_CANCER_DN		272	0.228784	1.02437	0.366224	0.888027	1	1018	tags=17%, list=13%, signal=19%	-1.02437
GAVIN_FOXP3_TARGETS_CLUSTER_P6		26	0.346736	1.02424	0.425243	0.887439	1	441	tags=12%, list=6%, signal=12%	-1.02424
MULLIGHAN_MLL_SIGNATURE_1_UP		193	0.239258	1.02281	0.38921	0.891835	1	1404	tags=22%, list=18%, signal=26%	-1.02281
ALFANO_MYC_TARGETS		137	0.25151	1.0225	0.401942	0.891829	1	847	tags=16%, list=11%, signal=18%	-1.0225
DAUER_STAT3_TARGETS_UP		26	0.33803	1.02248	0.395257	0.890825	1	1123	tags=27%, list=14%, signal=31%	-1.02248
REACTOME_FC_EPSILON_RECEPTOR_FCERI_SIGNALING		85	0.268824	1.02238	0.365201	0.890119	1	1733	tags=31%, list=22%, signal=39%	-1.02238
PID_RAS_PATHWAY		18	0.373344	1.02028	0.405242	0.896826	1	1616	tags=33%, list=21%, signal=42%	-1.02028
REACTOME_DOWNSTREAM_SIGNAL_TRANSDUCTION		22	0.349693	1.02026	0.407407	0.895806	1	2039	tags=27%, list=26%, signal=37%	-1.02026
KAAB_HEART_ATRIUM_VS_VENTRICLE_DN		159	0.245058	1.02015	0.384016	0.89514	1	2246	tags=38%, list=29%, signal=52%	-1.02015
TANAKA_METHYLATED_IN_ESOPHAGEAL_CARCINOMA		38	0.31981	1.01816	0.425101	0.901114	1	1573	tags=29%, list=20%, signal=36%	-1.01816
WP_COMPLEMENT_SYSTEM		36	0.312123	1.01796	0.397177	0.900836	1	2357	tags=50%, list=30%, signal=71%	-1.01796
LENAOUR_DENDRITIC_CELL_MATURATION_UP		46	0.298217	1.01791	0.400778	0.899911	1	1334	tags=22%, list=17%, signal=26%	-1.01791
REACTOME_MITOTIC_G1_PHASE_AND_G1_S_TRANSITION		70	0.277008	1.01767	0.416996	0.89976	1	1966	tags=34%, list=25%, signal=45%	-1.01767
SESTO_RESPONSE_TO_UV_C5		36	0.317646	1.01759	0.419103	0.898975	1	721	tags=14%, list=9%, signal=15%	-1.01759
REACTOME_CELLULAR_RESPONSE_TO_STARVATION		117	0.251758	1.01748	0.412229	0.898278	1	858	tags=15%, list=11%, signal=17%	-1.01748
REACTOME_SYNTHESIS_OF_SUBSTRATES_IN_N_GLYCAN_BIOSYTHESIS		32	0.320713	1.01681	0.409182	0.899624	1	665	tags=16%, list=9%, signal=17%	-1.01681
WP_EMBRYONIC_STEM_CELL_PLURIPOTENCY_PATHWAYS		40	0.3131	1.01657	0.446465	0.899424	1	1954	tags=30%, list=25%, signal=40%	-1.01657
BRUINS_UVC_RESPONSE_VIA_TP53_GROUP_D		130	0.250363	1.01576	0.428037	0.901358	1	1121	tags=19%, list=14%, signal=22%	-1.01576
GENTILE_UV_RESPONSE_CLUSTER_D4		31	0.324833	1.01563	0.396917	0.900784	1	1058	tags=23%, list=14%, signal=26%	-1.01563
REACTOME_RHOB_GTPASE_CYCLE		44	0.303986	1.01547	0.435946	0.900304	1	2105	tags=41%, list=27%, signal=56%	-1.01547
WP_MODULATORS_OF_TCR_SIGNALING_AND_T_CELL_ACTIVATION		23	0.349553	1.01531	0.416667	0.899814	1	2185	tags=43%, list=28%, signal=60%	-1.01531
REACTOME_RNA_POLYMERASE_III_TRANSCRIPTION_INITIATION_FROM_TYPE_3_PROMOTER		17	0.375154	1.01517	0.427451	0.899226	1	2174	tags=47%, list=28%, signal=65%	-1.01517
WEI_MYCN_TARGETS_WITH_E_BOX		488	0.217646	1.01482	0.407609	0.899479	1	1570	tags=23%, list=20%, signal=27%	-1.01482
WP_HOSTPATHOGEN_INTERACTION_OF_HUMAN_CORONAVIRUSES_INTERFERON_INDUCTION		19	0.367396	1.01474	0.426326	0.898679	1	1122	tags=32%, list=14%, signal=37%	-1.01474
PAPASPYRIDONOS_UNSTABLE_ATEROSCLEROTIC_PLAQUE_UP		21	0.359906	1.01328	0.421811	0.90299	1	1824	tags=29%, list=23%, signal=37%	-1.01328
FAELT_B_CLL_WITH_VH_REARRANGEMENTS_UP		23	0.353101	1.01318	0.445545	0.902318	1	1482	tags=35%, list=19%, signal=43%	-1.01318
REACTOME_REGULATION_OF_PLK1_ACTIVITY_AT_G2_M_TRANSITION		39	0.30927	1.01287	0.452906	0.902333	1	1450	tags=33%, list=19%, signal=41%	-1.01287
WANG_BARRETTS_ESOPHAGUS_UP		19	0.357116	1.01252	0.440476	0.90264	1	2500	tags=47%, list=32%, signal=70%	-1.01252
KEGG_CHEMOKINE_SIGNALING_PATHWAY		77	0.26732	1.01241	0.403614	0.902053	1	2033	tags=36%, list=26%, signal=49%	-1.01241
REACTOME_CILIUM_ASSEMBLY		103	0.258617	1.01232	0.421252	0.901286	1	1467	tags=28%, list=19%, signal=34%	-1.01232
BUYTAERT_PHOTODYNAMIC_THERAPY_STRESS_UP		404	0.220044	1.01207	0.407547	0.901095	1	1159	tags=17%, list=15%, signal=19%	-1.01207
BASSO_CD40_SIGNALING_DN		27	0.331228	1.01195	0.440228	0.900436	1	226	tags=11%, list=3%, signal=11%	-1.01195
REACTOME_METABOLISM_OF_LIPIDS		412	0.217219	1.01183	0.418426	0.899793	1	1356	tags=18%, list=17%, signal=21%	-1.01183
WP_FOCAL_ADHESION		100	0.26196	1.01175	0.435644	0.899036	1	1954	tags=32%, list=25%, signal=42%	-1.01175
PID_VEGFR1_2_PATHWAY		47	0.29644	1.0102	0.462598	0.903762	1	2185	tags=40%, list=28%, signal=56%	-1.0102
BROWNE_HCMV_INFECTION_24HR_UP		78	0.268696	1.00936	0.410569	0.90582	1	1194	tags=23%, list=15%, signal=27%	-1.00936
REACTOME_ENERGY_DEPENDENT_REGULATION_OF_MTOR_BY_LKB1_AMPK		21	0.362633	1.00933	0.453686	0.904823	1	1444	tags=33%, list=19%, signal=41%	-1.00933
FOROUTAN_INTEGRATED_TGFB_EMT_UP		51	0.28804	1.00901	0.418651	0.904949	1	1336	tags=22%, list=17%, signal=26%	-1.00901
BROWNE_HCMV_INFECTION_30MIN_DN		56	0.285992	1.00876	0.420952	0.904797	1	1469	tags=29%, list=19%, signal=35%	-1.00876
ELVIDGE_HYPOXIA_UP		59	0.282987	1.00848	0.42607	0.904791	1	1917	tags=34%, list=25%, signal=45%	-1.00848
SCIAN_INVERSED_TARGETS_OF_TP53_AND_TP73_DN		17	0.380291	1.00822	0.463511	0.904691	1	1661	tags=47%, list=21%, signal=60%	-1.00822
REACTOME_RNA_POLYMERASE_III_TRANSCRIPTION_INITIATION_FROM_TYPE_1_PROMOTER		18	0.370222	1.00765	0.451243	0.905701	1	2176	tags=50%, list=28%, signal=69%	-1.00765
BIOCARTA_HIVNEF_PATHWAY		35	0.316075	1.00734	0.445098	0.905774	1	1026	tags=23%, list=13%, signal=26%	-1.00734
WATANABE_RECTAL_CANCER_RADIOTHERAPY_RESPONSIVE_DN		58	0.284702	1.00723	0.458918	0.905105	1	2061	tags=40%, list=26%, signal=53%	-1.00723
DARWICHE_PAPILLOMA_RISK_HIGH_UP		72	0.273044	1.0069	0.423077	0.905241	1	1056	tags=21%, list=14%, signal=24%	-1.0069
FIRESTEIN_PROLIFERATION		86	0.265143	1.00674	0.396857	0.904802	1	1478	tags=24%, list=19%, signal=30%	-1.00674
SCHUHMACHER_MYC_TARGETS_UP		57	0.279281	1.0067	0.445283	0.903872	1	1452	tags=26%, list=19%, signal=32%	-1.0067
KEGG_PROSTATE_CANCER		32	0.320633	1.00533	0.44	0.907763	1	1016	tags=19%, list=13%, signal=21%	-1.00533
SANSOM_APC_MYC_TARGETS		130	0.247854	1.00434	0.426829	0.91026	1	1159	tags=16%, list=15%, signal=19%	-1.00434
REACTOME_MITOTIC_METAPHASE_AND_ANAPHASE		142	0.244125	1.004	0.453704	0.91043	1	1677	tags=27%, list=22%, signal=34%	-1.004
PID_RET_PATHWAY		28	0.331215	1.00395	0.465863	0.909567	1	1896	tags=29%, list=24%, signal=38%	-1.00395
HAHTOLA_MYCOSIS_FUNGOIDES_CD4_UP		19	0.357542	1.00304	0.450734	0.911807	1	2148	tags=47%, list=28%, signal=65%	-1.00304
REACTOME_SIGNALING_BY_ERBB4		25	0.340231	1.00271	0.457732	0.911889	1	279	tags=12%, list=4%, signal=12%	-1.00271
LIU_LIVER_CANCER		15	0.378082	1.0026	0.463796	0.911234	1	1343	tags=20%, list=17%, signal=24%	-1.0026
GAL_LEUKEMIC_STEM_CELL_UP		60	0.280794	1.00259	0.445328	0.910239	1	2134	tags=32%, list=27%, signal=43%	-1.00259
WP_MBDNF_AND_PROBDNF_REGULATION_OF_GABA_NEUROTRANSMISSION		20	0.359761	1.00252	0.458984	0.909453	1	792	tags=25%, list=10%, signal=28%	-1.00252
REACTOME_RHOBTB1_GTPASE_CYCLE		17	0.370479	1.00228	0.453155	0.9093	1	1080	tags=24%, list=14%, signal=27%	-1.00228
NUYTTEN_EZH2_TARGETS_UP		489	0.215933	1.00186	0.438889	0.909832	1	1358	tags=21%, list=17%, signal=24%	-1.00186
WP_STATIN_INHIBITION_OF_CHOLESTEROL_PRODUCTION		20	0.358424	1.0017	0.433054	0.909403	1	1958	tags=45%, list=25%, signal=60%	-1.0017
LIM_MAMMARY_LUMINAL_PROGENITOR_UP		19	0.359472	1.00138	0.456929	0.909558	1	1417	tags=42%, list=18%, signal=51%	-1.00138
ELVIDGE_HYPOXIA_BY_DMOG_UP		49	0.293226	1.00064	0.433852	0.911219	1	1804	tags=35%, list=23%, signal=45%	-1.00064
PAL_PRMT5_TARGETS_UP		129	0.245519	1.00047	0.439689	0.910775	1	1180	tags=23%, list=15%, signal=27%	-1.00047
PID_REELIN_PATHWAY		21	0.345366	1.00031	0.453155	0.910297	1	792	tags=19%, list=10%, signal=21%	-1.00031
YAMAZAKI_TCEB3_TARGETS_DN		106	0.254687	0.999388	0.477407	0.912602	1	1735	tags=27%, list=22%, signal=35%	-0.999388
REACTOME_SYNTHESIS_OF_DNA		71	0.272267	0.998905	0.462107	0.913256	1	1579	tags=27%, list=20%, signal=33%	-0.998905
LINDGREN_BLADDER_CANCER_CLUSTER_3_UP		151	0.238423	0.997476	0.462777	0.917465	1	1448	tags=25%, list=19%, signal=30%	-0.997476
KEGG_CYTOSOLIC_DNA_SENSING_PATHWAY		22	0.355768	0.997332	0.461686	0.91695	1	2050	tags=41%, list=26%, signal=55%	-0.997332
DEBIASI_APOPTOSIS_BY_REOVIRUS_INFECTION_UP		148	0.245489	0.997287	0.466539	0.916049	1	1519	tags=26%, list=19%, signal=32%	-0.997287
HOSHIDA_LIVER_CANCER_SUBCLASS_S3		136	0.239917	0.997203	0.465863	0.915318	1	1334	tags=21%, list=17%, signal=25%	-0.997203
SENGUPTA_NASOPHARYNGEAL_CARCINOMA_DN		97	0.261891	0.996929	0.448413	0.915251	1	1190	tags=20%, list=15%, signal=23%	-0.996929
BIOCARTA_INTEGRIN_PATHWAY		18	0.358419	0.996878	0.447419	0.91438	1	899	tags=17%, list=12%, signal=19%	-0.996878
CUI_TCF21_TARGETS_2_UP		213	0.229243	0.996475	0.478261	0.914762	1	1492	tags=23%, list=19%, signal=27%	-0.996475
WINTER_HYPOXIA_METAGENE		110	0.254451	0.996178	0.455102	0.91483	1	1233	tags=25%, list=16%, signal=29%	-0.996178
HESS_TARGETS_OF_HOXA9_AND_MEIS1_UP		44	0.295985	0.99611	0.472505	0.914057	1	1289	tags=23%, list=17%, signal=27%	-0.99611
CREIGHTON_ENDOCRINE_THERAPY_RESISTANCE_1		252	0.225448	0.995608	0.434615	0.914872	1	1142	tags=17%, list=15%, signal=19%	-0.995608
KAYO_AGING_MUSCLE_UP		97	0.256863	0.995483	0.468691	0.914252	1	1789	tags=29%, list=23%, signal=37%	-0.995483
REACTOME_REGULATED_NECROSIS		26	0.329414	0.995227	0.45977	0.914149	1	1251	tags=27%, list=16%, signal=32%	-0.995227
YORDY_RECIPROCAL_REGULATION_BY_ETS1_AND_SP100_DN		22	0.341403	0.995089	0.463221	0.913633	1	810	tags=18%, list=10%, signal=20%	-0.995089
XU_GH1_AUTOCRINE_TARGETS_DN		76	0.268163	0.994878	0.466151	0.91334	1	375	tags=13%, list=5%, signal=14%	-0.994878
REACTOME_SIGNALING_BY_PDGFR_IN_DISEASE		15	0.376056	0.994794	0.467742	0.912617	1	1680	tags=27%, list=22%, signal=34%	-0.994794
STAEGE_EWING_FAMILY_TUMOR		15	0.38243	0.994588	0.481766	0.912306	1	1856	tags=53%, list=24%, signal=70%	-0.994588
SASSON_RESPONSE_TO_FORSKOLIN_DN		45	0.290181	0.994414	0.438384	0.911944	1	1531	tags=24%, list=20%, signal=30%	-0.994414
AFFAR_YY1_TARGETS_UP		78	0.269969	0.994398	0.455268	0.910975	1	1303	tags=17%, list=17%, signal=20%	-0.994398
VERHAAK_GLIOBLASTOMA_MESENCHYMAL		75	0.270348	0.99428	0.477011	0.910388	1	2070	tags=33%, list=27%, signal=45%	-0.99428
HAN_SATB1_TARGETS_UP		206	0.231591	0.99416	0.465726	0.909828	1	1958	tags=32%, list=25%, signal=41%	-0.99416
SCHAEFFER_PROSTATE_DEVELOPMENT_48HR_DN		185	0.23313	0.993915	0.478182	0.909686	1	840	tags=14%, list=11%, signal=15%	-0.993915
TURASHVILI_BREAST_LOBULAR_CARCINOMA_VS_DUCTAL_NORMAL_UP		29	0.322746	0.992771	0.46875	0.912779	1	1073	tags=24%, list=14%, signal=28%	-0.992771
MULLIGHAN_NPM1_MUTATED_SIGNATURE_1_DN		71	0.273518	0.992374	0.45674	0.91317	1	1424	tags=25%, list=18%, signal=31%	-0.992374
WP_BARDETBIEDL_SYNDROME		48	0.285838	0.992353	0.442043	0.912223	1	1128	tags=27%, list=14%, signal=31%	-0.992353
IBRAHIM_NRF2_UP		341	0.21841	0.991745	0.486056	0.913431	1	1539	tags=22%, list=20%, signal=26%	-0.991745
REACTOME_S_PHASE		91	0.256234	0.990885	0.474903	0.915653	1	1407	tags=21%, list=18%, signal=25%	-0.990885
BIOCARTA_MAPK_PATHWAY		42	0.298821	0.99074	0.473988	0.915156	1	1167	tags=24%, list=15%, signal=28%	-0.99074
KEGG_MELANOMA		23	0.345959	0.9907	0.455769	0.914286	1	1680	tags=30%, list=22%, signal=39%	-0.9907
REACTOME_ORC1_REMOVAL_FROM_CHROMATIN		46	0.292151	0.990692	0.468872	0.913311	1	1677	tags=35%, list=22%, signal=44%	-0.990692
EBAUER_TARGETS_OF_PAX3_FOXO1_FUSION_DN		24	0.332764	0.990364	0.484849	0.913446	1	1493	tags=21%, list=19%, signal=26%	-0.990364
KUMAR_AUTOPHAGY_NETWORK		30	0.321849	0.989673	0.466038	0.914924	1	1613	tags=27%, list=21%, signal=33%	-0.989673
REACTOME_C_TYPE_LECTIN_RECEPTORS_CLRS		78	0.264783	0.989436	0.464567	0.914748	1	1751	tags=31%, list=22%, signal=39%	-0.989436
REACTOME_RHO_GTPASE_EFFECTORS		129	0.243916	0.989167	0.487524	0.914693	1	1977	tags=30%, list=25%, signal=40%	-0.989167
FRASOR_RESPONSE_TO_SERM_OR_FULVESTRANT_DN		17	0.364587	0.988964	0.456693	0.914386	1	913	tags=24%, list=12%, signal=27%	-0.988964
ZHOU_TNF_SIGNALING_30MIN		26	0.337214	0.988587	0.478351	0.914674	1	2376	tags=54%, list=30%, signal=77%	-0.988587
TAKEDA_TARGETS_OF_NUP98_HOXA9_FUSION_8D_UP		53	0.283511	0.988285	0.470348	0.914755	1	543	tags=11%, list=7%, signal=12%	-0.988285
MANALO_HYPOXIA_UP		87	0.258282	0.988042	0.47551	0.914656	1	1670	tags=29%, list=21%, signal=36%	-0.988042
DESERT_PERIPORTAL_HEPATOCELLULAR_CARCINOMA_SUBCLASS_UP		52	0.281622	0.987828	0.487476	0.914362	1	1182	tags=25%, list=15%, signal=29%	-0.987828
REACTOME_THE_ROLE_OF_GTSE1_IN_G2_M_PROGRESSION_AFTER_G2_CHECKPOINT		45	0.293549	0.987684	0.466411	0.913851	1	1677	tags=33%, list=22%, signal=42%	-0.987684
WP_ATM_SIGNALING_PATHWAY		15	0.375204	0.987425	0.471545	0.913793	1	1026	tags=40%, list=13%, signal=46%	-0.987425
BLANCO_MELO_COVID19_BRONCHIAL_EPITHELIAL_CELLS_SARS_COV_2_INFECTION_UP		22	0.342502	0.987181	0.470588	0.9137	1	1123	tags=23%, list=14%, signal=26%	-0.987181
PARK_HSC_MARKERS		25	0.331624	0.987099	0.464968	0.913002	1	578	tags=16%, list=7%, signal=17%	-0.987099
REACTOME_KEAP1_NFE2L2_PATHWAY		72	0.265769	0.986263	0.46729	0.914982	1	1751	tags=32%, list=22%, signal=41%	-0.986263
REACTOME_PEPTIDE_LIGAND_BINDING_RECEPTORS		34	0.305216	0.98605	0.487524	0.914789	1	1239	tags=29%, list=16%, signal=35%	-0.98605
ZHANG_TARGETS_OF_EWSR1_FLI1_FUSION		49	0.289629	0.985628	0.501984	0.915238	1	1419	tags=31%, list=18%, signal=37%	-0.985628
FLECHNER_BIOPSY_KIDNEY_TRANSPLANT_REJECTED_VS_OK_DN		348	0.216285	0.985581	0.515625	0.914413	1	1703	tags=25%, list=22%, signal=31%	-0.985581
LIU_PROSTATE_CANCER_UP		47	0.287402	0.984886	0.461538	0.9159	1	1237	tags=23%, list=16%, signal=28%	-0.984886
SMID_BREAST_CANCER_LUMINAL_B_DN		166	0.236229	0.984796	0.492248	0.915241	1	2069	tags=34%, list=27%, signal=46%	-0.984796
REACTOME_HOST_INTERACTIONS_OF_HIV_FACTORS		101	0.251094	0.984662	0.472656	0.914703	1	1677	tags=30%, list=22%, signal=37%	-0.984662
BERENJENO_TRANSFORMED_BY_RHOA_UP		286	0.220174	0.983951	0.50478	0.916277	1	1512	tags=24%, list=19%, signal=29%	-0.983951
PID_PDGFRB_PATHWAY		84	0.26049	0.983258	0.482	0.917773	1	1890	tags=27%, list=24%, signal=36%	-0.983258
CHICAS_RB1_TARGETS_SENESCENT		229	0.225492	0.983176	0.472222	0.917096	1	1194	tags=20%, list=15%, signal=23%	-0.983176
KENNY_CTNNB1_TARGETS_UP		20	0.352202	0.982879	0.507722	0.917192	1	630	tags=15%, list=8%, signal=16%	-0.982879
PID_P53_DOWNSTREAM_PATHWAY		57	0.277021	0.982743	0.483366	0.916714	1	1670	tags=28%, list=21%, signal=35%	-0.982743
KRASNOSELSKAYA_ILF3_TARGETS_DN		23	0.338091	0.982572	0.479592	0.916334	1	1700	tags=35%, list=22%, signal=44%	-0.982572
SENESE_HDAC2_TARGETS_DN		43	0.294083	0.982425	0.493042	0.915876	1	322	tags=9%, list=4%, signal=10%	-0.982425
STREICHER_LSM1_TARGETS_UP		17	0.359049	0.981856	0.479846	0.917009	1	854	tags=24%, list=11%, signal=26%	-0.981856
KRIEG_HYPOXIA_VIA_KDM3A		15	0.376255	0.981373	0.461977	0.917727	1	1776	tags=47%, list=23%, signal=60%	-0.981373
SPIELMAN_LYMPHOBLAST_EUROPEAN_VS_ASIAN_DN		359	0.21443	0.981115	0.513462	0.91763	1	1419	tags=20%, list=18%, signal=24%	-0.981115
AKL_HTLV1_INFECTION_DN		35	0.303498	0.980201	0.492424	0.919734	1	348	tags=14%, list=4%, signal=15%	-0.980201
DUTERTRE_ESTRADIOL_RESPONSE_6HR_DN		30	0.318301	0.979218	0.503817	0.922122	1	1906	tags=33%, list=24%, signal=44%	-0.979218
DEURIG_T_CELL_PROLYMPHOCYTIC_LEUKEMIA_UP		170	0.232277	0.979149	0.496016	0.921418	1	1501	tags=24%, list=19%, signal=29%	-0.979149
MEISSNER_BRAIN_HCP_WITH_H3K4ME3_AND_H3K27ME3		336	0.213783	0.978505	0.518738	0.922716	1	1159	tags=16%, list=15%, signal=18%	-0.978505
ACEVEDO_LIVER_TUMOR_VS_NORMAL_ADJACENT_TISSUE_UP		497	0.208561	0.977332	0.550622	0.92581	1	1990	tags=29%, list=26%, signal=37%	-0.977332
SHETH_LIVER_CANCER_VS_TXNIP_LOSS_PAM3		29	0.315912	0.977151	0.490909	0.92551	1	1670	tags=34%, list=21%, signal=44%	-0.977151
PID_FANCONI_PATHWAY		15	0.375757	0.976752	0.492395	0.925934	1	703	tags=20%, list=9%, signal=22%	-0.976752
REACTOME_G2_M_CHECKPOINTS		67	0.271909	0.976383	0.492	0.92628	1	1677	tags=30%, list=22%, signal=38%	-0.976383
VERHAAK_AML_WITH_NPM1_MUTATED_DN		98	0.253313	0.975362	0.513078	0.928831	1	1683	tags=20%, list=22%, signal=26%	-0.975362
IBRAHIM_NRF1_DOWN		63	0.273633	0.974915	0.512552	0.929404	1	1832	tags=30%, list=23%, signal=39%	-0.974915
REACTOME_ARACHIDONIC_ACID_METABOLISM		21	0.343383	0.974721	0.492248	0.929115	1	2211	tags=48%, list=28%, signal=66%	-0.974721
REACTOME_PHASE_I_FUNCTIONALIZATION_OF_COMPOUNDS		36	0.301611	0.974285	0.481262	0.929649	1	1602	tags=25%, list=21%, signal=31%	-0.974285
WENG_POR_TARGETS_LIVER_UP		21	0.340326	0.974147	0.455301	0.929123	1	1822	tags=33%, list=23%, signal=43%	-0.974147
JAZAERI_BREAST_CANCER_BRCA1_VS_BRCA2_UP		28	0.320147	0.974004	0.493697	0.928633	1	528	tags=14%, list=7%, signal=15%	-0.974004
REACTOME_TBC_RABGAPS		28	0.314127	0.973846	0.495798	0.928243	1	1222	tags=21%, list=16%, signal=25%	-0.973846
TORCHIA_TARGETS_OF_EWSR1_FLI1_FUSION_DN		147	0.234382	0.973074	0.509652	0.929964	1	1890	tags=29%, list=24%, signal=38%	-0.973074
KEGG_GLYCEROLIPID_METABOLISM		29	0.317252	0.972968	0.483301	0.929337	1	993	tags=21%, list=13%, signal=24%	-0.972968
BLANCO_MELO_HUMAN_PARAINFLUENZA_VIRUS_3_INFECTION_A594_CELLS_DN		28	0.318333	0.972613	0.508772	0.929671	1	850	tags=18%, list=11%, signal=20%	-0.972613
ROZANOV_MMP14_TARGETS_SUBSET		17	0.361727	0.972504	0.488722	0.929032	1	713	tags=18%, list=9%, signal=19%	-0.972504
SIG_INSULIN_RECEPTOR_PATHWAY_IN_CARDIAC_MYOCYTES		26	0.328716	0.972432	0.483685	0.928311	1	2280	tags=46%, list=29%, signal=65%	-0.972432
DARWICHE_SQUAMOUS_CELL_CARCINOMA_UP		73	0.26	0.971866	0.523438	0.929286	1	1572	tags=27%, list=20%, signal=34%	-0.971866
BOQUEST_STEM_CELL_UP		99	0.249269	0.971295	0.530572	0.930322	1	1885	tags=29%, list=24%, signal=38%	-0.971295
WALLACE_PROSTATE_CANCER_RACE_DN		41	0.290057	0.971214	0.484436	0.929639	1	2092	tags=32%, list=27%, signal=43%	-0.971214
SCHRAETS_MLL_TARGETS_UP		18	0.354376	0.97097	0.481905	0.929573	1	1840	tags=39%, list=24%, signal=51%	-0.97097
SWEET_KRAS_TARGETS_DN		33	0.305844	0.970913	0.513834	0.92883	1	583	tags=12%, list=7%, signal=13%	-0.970913
SANA_TNF_SIGNALING_UP		26	0.325318	0.970599	0.477842	0.928969	1	56	tags=8%, list=1%, signal=8%	-0.970599
ZHOU_INFLAMMATORY_RESPONSE_LIVE_UP		148	0.23378	0.970313	0.535645	0.928976	1	1408	tags=22%, list=18%, signal=27%	-0.970313
REACTOME_DEGRADATION_OF_GLI1_BY_THE_PROTEASOME		45	0.287651	0.969327	0.502982	0.931443	1	1677	tags=33%, list=22%, signal=42%	-0.969327
POOLA_INVASIVE_BREAST_CANCER_UP		61	0.27341	0.968605	0.523438	0.932991	1	1671	tags=31%, list=21%, signal=39%	-0.968605
GRYDER_PAX3FOXO1_TOP_ENHANCERS		271	0.217143	0.968576	0.554328	0.932107	1	1732	tags=24%, list=22%, signal=29%	-0.968576
SMID_BREAST_CANCER_BASAL_UP		224	0.22089	0.968529	0.547758	0.931296	1	1344	tags=22%, list=17%, signal=26%	-0.968529
CAIRO_HEPATOBLASTOMA_CLASSES_DN		100	0.248241	0.968506	0.547758	0.930418	1	1600	tags=24%, list=21%, signal=30%	-0.968506
REACTOME_PTEN_REGULATION		94	0.25057	0.968418	0.537223	0.929744	1	966	tags=16%, list=12%, signal=18%	-0.968418
KYNG_DNA_DAMAGE_DN		86	0.252266	0.968234	0.526523	0.929385	1	1835	tags=34%, list=24%, signal=44%	-0.968234
BERTUCCI_MEDULLARY_VS_DUCTAL_BREAST_CANCER_UP		83	0.253569	0.968092	0.49899	0.928922	1	1352	tags=23%, list=17%, signal=27%	-0.968092
GRAESSMANN_RESPONSE_TO_MC_AND_DOXORUBICIN_UP		303	0.217237	0.968029	0.558824	0.928162	1	1419	tags=19%, list=18%, signal=22%	-0.968029
REACTOME_CELL_CYCLE_MITOTIC		259	0.218558	0.966453	0.548077	0.932497	1	1478	tags=23%, list=19%, signal=28%	-0.966453
JIANG_HYPOXIA_CANCER		39	0.296469	0.966292	0.5	0.932126	1	2498	tags=41%, list=32%, signal=60%	-0.966292
WANG_TARGETS_OF_MLL_CBP_FUSION_DN		35	0.303016	0.966018	0.523327	0.932115	1	1358	tags=20%, list=17%, signal=24%	-0.966018
PID_AR_NONGENOMIC_PATHWAY		18	0.358132	0.965829	0.511247	0.931822	1	1948	tags=50%, list=25%, signal=66%	-0.965829
WP_ATM_SIGNALING_IN_DEVELOPMENT_AND_DISEASE		27	0.323438	0.965807	0.505859	0.930924	1	2115	tags=44%, list=27%, signal=61%	-0.965807
CONCANNON_APOPTOSIS_BY_EPOXOMICIN_UP		119	0.24154	0.965185	0.535922	0.932105	1	1100	tags=21%, list=14%, signal=24%	-0.965185
NUYTTEN_NIPP1_TARGETS_DN		438	0.207088	0.965004	0.597744	0.931778	1	1395	tags=20%, list=18%, signal=23%	-0.965004
DACOSTA_UV_RESPONSE_VIA_ERCC3_COMMON_UP		36	0.300673	0.964844	0.508571	0.931405	1	1789	tags=28%, list=23%, signal=36%	-0.964844
SAKAI_TUMOR_INFILTRATING_MONOCYTES_UP		15	0.372561	0.964614	0.511952	0.931196	1	484	tags=20%, list=6%, signal=21%	-0.964614
KARLSSON_TGFB1_TARGETS_UP		92	0.254934	0.964394	0.521042	0.931004	1	1477	tags=23%, list=19%, signal=28%	-0.964394
JOHNSTONE_PARVB_TARGETS_2_DN		199	0.225314	0.964075	0.525714	0.931213	1	509	tags=10%, list=7%, signal=10%	-0.964075
TORCHIA_TARGETS_OF_EWSR1_FLI1_FUSION_UP		129	0.2346	0.964053	0.522988	0.930345	1	1323	tags=18%, list=17%, signal=21%	-0.964053
LEE_TARGETS_OF_PTCH1_AND_SUFU_DN		56	0.274949	0.963345	0.520958	0.931764	1	1538	tags=29%, list=20%, signal=35%	-0.963345
MARIADASON_REGULATED_BY_HISTONE_ACETYLATION_UP		35	0.29899	0.962826	0.503861	0.932607	1	2185	tags=37%, list=28%, signal=51%	-0.962826
CROONQUIST_STROMAL_STIMULATION_UP		20	0.349518	0.962644	0.513619	0.932289	1	2053	tags=40%, list=26%, signal=54%	-0.962644
CHEN_LVAD_SUPPORT_OF_FAILING_HEART_DN		15	0.360422	0.962062	0.502994	0.933324	1	1546	tags=33%, list=20%, signal=41%	-0.962062
REACTOME_SARS_COV_INFECTIONS		240	0.22119	0.962028	0.586074	0.932484	1	1067	tags=17%, list=14%, signal=19%	-0.962028
FIGUEROA_AML_METHYLATION_CLUSTER_1_DN		19	0.34523	0.962017	0.49569	0.931569	1	1797	tags=32%, list=23%, signal=41%	-0.962017
MATSUDA_NATURAL_KILLER_DIFFERENTIATION		211	0.224135	0.961789	0.581651	0.931469	1	1242	tags=21%, list=16%, signal=24%	-0.961789
RUTELLA_RESPONSE_TO_CSF2RB_AND_IL4_UP		174	0.226777	0.961463	0.568182	0.93163	1	1382	tags=21%, list=18%, signal=25%	-0.961463
CROONQUIST_IL6_DEPRIVATION_DN		37	0.297525	0.961106	0.517578	0.931932	1	1001	tags=19%, list=13%, signal=22%	-0.961106
PID_PTP1B_PATHWAY		27	0.324958	0.960837	0.512922	0.931941	1	2374	tags=44%, list=30%, signal=64%	-0.960837
REACTOME_SARS_COV_2_INFECTION		185	0.224919	0.960654	0.577651	0.931639	1	1067	tags=16%, list=14%, signal=18%	-0.960654
WP_VITAMIN_D_RECEPTOR_PATHWAY		44	0.287973	0.960294	0.516995	0.931917	1	680	tags=14%, list=9%, signal=15%	-0.960294
REACTOME_INTRA_GOLGI_AND_RETROGRADE_GOLGI_TO_ER_TRAFFIC		119	0.240407	0.960237	0.565217	0.931192	1	1082	tags=17%, list=14%, signal=19%	-0.960237
KEGG_SPHINGOLIPID_METABOLISM		23	0.329384	0.960065	0.53125	0.930891	1	880	tags=17%, list=11%, signal=20%	-0.960065
REACTOME_NEURONAL_SYSTEM		202	0.222264	0.959963	0.560521	0.930338	1	1616	tags=21%, list=21%, signal=26%	-0.959963
MOREAUX_MULTIPLE_MYELOMA_BY_TACI_DN		114	0.238941	0.959693	0.542533	0.930311	1	1462	tags=25%, list=19%, signal=31%	-0.959693
KIM_ALL_DISORDERS_DURATION_CORR_DN		107	0.244781	0.959243	0.548689	0.930905	1	1295	tags=21%, list=17%, signal=25%	-0.959243
TCGA_GLIOBLASTOMA_COPY_NUMBER_DN		17	0.350601	0.959137	0.54054	0.930367	1	994	tags=29%, list=13%, signal=34%	-0.959137
NADLER_OBESITY_UP		36	0.293016	0.958809	0.533066	0.930575	1	2301	tags=39%, list=29%, signal=55%	-0.958809
SHAFFER_IRF4_TARGETS_IN_PLASMA_CELL_VS_MATURE_B_LYMPHOCYTE		29	0.314812	0.958462	0.510763	0.930839	1	1285	tags=34%, list=16%, signal=41%	-0.958462
CROONQUIST_NRAS_VS_STROMAL_STIMULATION_DN		30	0.311091	0.957907	0.525328	0.93182	1	879	tags=20%, list=11%, signal=22%	-0.957907
REACTOME_SIGNALING_BY_PTK6		24	0.323427	0.957761	0.516315	0.931353	1	46	tags=8%, list=1%, signal=8%	-0.957761
AMIT_SERUM_RESPONSE_120_MCF10A		22	0.335208	0.957513	0.519011	0.931269	1	1408	tags=27%, list=18%, signal=33%	-0.957513
BASSO_B_LYMPHOCYTE_NETWORK		88	0.252051	0.95705	0.551383	0.931943	1	1616	tags=27%, list=21%, signal=34%	-0.95705
LINDGREN_BLADDER_CANCER_HIGH_RECURRENCE		26	0.324985	0.956846	0.491903	0.931668	1	879	tags=19%, list=11%, signal=22%	-0.956846
ENK_UV_RESPONSE_EPIDERMIS_DN		262	0.214941	0.956648	0.594697	0.931457	1	1616	tags=24%, list=21%, signal=30%	-0.956648
RAY_TUMORIGENESIS_BY_ERBB2_CDC25A_DN		130	0.236017	0.956147	0.566075	0.93226	1	1815	tags=25%, list=23%, signal=32%	-0.956147
REACTOME_CARGO_CONCENTRATION_IN_THE_ER		18	0.343596	0.955869	0.535573	0.932224	1	146	tags=11%, list=2%, signal=11%	-0.955869
LINDSTEDT_DENDRITIC_CELL_MATURATION_D		32	0.301187	0.95578	0.528626	0.93164	1	884	tags=19%, list=11%, signal=21%	-0.95578
REACTOME_EXTRACELLULAR_MATRIX_ORGANIZATION		122	0.236496	0.955462	0.548255	0.93181	1	1673	tags=29%, list=21%, signal=36%	-0.955462
BROWNE_HCMV_INFECTION_18HR_UP		96	0.244535	0.954652	0.571992	0.93365	1	1041	tags=19%, list=13%, signal=21%	-0.954652
WATANABE_RECTAL_CANCER_RADIOTHERAPY_RESPONSIVE_UP		73	0.255581	0.954496	0.554672	0.933241	1	2103	tags=37%, list=27%, signal=50%	-0.954496
HELLER_HDAC_TARGETS_SILENCED_BY_METHYLATION_DN		114	0.23996	0.954218	0.565217	0.933265	1	1336	tags=20%, list=17%, signal=24%	-0.954218
HOWLIN_CITED1_TARGETS_1_DN		20	0.339119	0.953871	0.523904	0.93345	1	473	tags=10%, list=6%, signal=11%	-0.953871
PID_MYC_REPRESS_PATHWAY		30	0.307345	0.953236	0.532258	0.934669	1	1286	tags=27%, list=16%, signal=32%	-0.953236
LU_IL4_SIGNALING		37	0.295678	0.953122	0.536822	0.934129	1	1936	tags=38%, list=25%, signal=50%	-0.953122
JAEGER_METASTASIS_UP		21	0.341451	0.9528	0.500952	0.934253	1	1700	tags=38%, list=22%, signal=49%	-0.9528
RODRIGUES_THYROID_CARCINOMA_POORLY_DIFFERENTIATED_UP		364	0.209495	0.952792	0.64841	0.933353	1	1187	tags=17%, list=15%, signal=19%	-0.952792
PID_CMYB_PATHWAY		31	0.306892	0.952275	0.549407	0.934184	1	1335	tags=23%, list=17%, signal=27%	-0.952275
REACTOME_HEDGEHOG_OFF_STATE		71	0.259415	0.951478	0.563536	0.936009	1	1579	tags=31%, list=20%, signal=38%	-0.951478
BIOCARTA_EIF4_PATHWAY		16	0.360697	0.951371	0.513834	0.93547	1	2280	tags=56%, list=29%, signal=79%	-0.951371
REACTOME_SIGNALING_BY_FGFR2_IN_DISEASE		23	0.326874	0.950778	0.520522	0.936497	1	1068	tags=22%, list=14%, signal=25%	-0.950778
REACTOME_GOLGI_TO_ER_RETROGRADE_TRANSPORT		67	0.258325	0.950732	0.540076	0.935754	1	1082	tags=16%, list=14%, signal=19%	-0.950732
PID_NETRIN_PATHWAY		22	0.335881	0.950591	0.550388	0.935299	1	1896	tags=32%, list=24%, signal=42%	-0.950591
ENK_UV_RESPONSE_KERATINOCYTE_UP		257	0.217414	0.95058	0.622568	0.934416	1	1543	tags=22%, list=20%, signal=26%	-0.95058
ASTON_MAJOR_DEPRESSIVE_DISORDER_DN		86	0.249419	0.950313	0.570312	0.934378	1	2071	tags=34%, list=27%, signal=45%	-0.950313
KEGG_ABC_TRANSPORTERS		24	0.325999	0.949698	0.524178	0.935535	1	721	tags=17%, list=9%, signal=18%	-0.949698
GARY_CD5_TARGETS_DN		287	0.214348	0.949386	0.617761	0.935587	1	1463	tags=21%, list=19%, signal=25%	-0.949386
MCDOWELL_ACUTE_LUNG_INJURY_DN		23	0.325338	0.949131	0.51462	0.93551	1	398	tags=13%, list=5%, signal=14%	-0.949131
WP_IL6_SIGNALING_PATHWAY		27	0.316634	0.947972	0.53629	0.938462	1	1751	tags=37%, list=22%, signal=48%	-0.947972
RICKMAN_METASTASIS_DN		116	0.23616	0.947866	0.551724	0.93793	1	1600	tags=27%, list=21%, signal=33%	-0.947866
LINDGREN_BLADDER_CANCER_CLUSTER_2A_DN		66	0.260737	0.947828	0.552182	0.937149	1	975	tags=18%, list=13%, signal=21%	-0.947828
BOYAULT_LIVER_CANCER_SUBCLASS_G6_UP		34	0.295185	0.947683	0.532164	0.936679	1	1575	tags=32%, list=20%, signal=40%	-0.947683
KEGG_HISTIDINE_METABOLISM		17	0.352052	0.947539	0.531381	0.936213	1	1194	tags=24%, list=15%, signal=28%	-0.947539
ABBUD_LIF_SIGNALING_1_UP		18	0.346868	0.947512	0.513185	0.935398	1	1508	tags=33%, list=19%, signal=41%	-0.947512
ZHAN_V2_LATE_DIFFERENTIATION_GENES		23	0.316399	0.947207	0.534188	0.935466	1	1687	tags=30%, list=22%, signal=39%	-0.947207
YAGI_AML_WITH_INV_16_TRANSLOCATION		219	0.216753	0.946852	0.607207	0.935748	1	1009	tags=15%, list=13%, signal=16%	-0.946852
SESTO_RESPONSE_TO_UV_C2		35	0.293222	0.946797	0.537255	0.935035	1	1137	tags=26%, list=15%, signal=30%	-0.946797
NAKAMURA_METASTASIS_MODEL_DN		18	0.346026	0.946426	0.554717	0.935302	1	1917	tags=50%, list=25%, signal=66%	-0.946426
AMIT_SERUM_RESPONSE_60_MCF10A		22	0.330125	0.946415	0.518727	0.934446	1	810	tags=32%, list=10%, signal=35%	-0.946415
WONG_ENDMETRIUM_CANCER_DN		32	0.301516	0.94605	0.522772	0.934726	1	1113	tags=19%, list=14%, signal=22%	-0.94605
MIKKELSEN_NPC_HCP_WITH_H3K27ME3		96	0.243567	0.945974	0.571977	0.934063	1	1943	tags=29%, list=25%, signal=38%	-0.945974
GOTZMANN_EPITHELIAL_TO_MESENCHYMAL_TRANSITION_DN		106	0.24063	0.945954	0.568047	0.93323	1	1735	tags=26%, list=22%, signal=34%	-0.945954
GROSS_HIF1A_TARGETS_DN		16	0.359742	0.945953	0.531313	0.932343	1	1419	tags=38%, list=18%, signal=46%	-0.945953
ZHANG_RESPONSE_TO_IKK_INHIBITOR_AND_TNF_UP		67	0.261809	0.945514	0.558416	0.932899	1	1280	tags=27%, list=16%, signal=32%	-0.945514
REACTOME_HOMOLOGOUS_DNA_PAIRING_AND_STRAND_EXCHANGE		15	0.36194	0.945433	0.529963	0.932291	1	703	tags=20%, list=9%, signal=22%	-0.945433
PID_BETA_CATENIN_NUC_PATHWAY		26	0.312105	0.94523	0.522988	0.932056	1	1255	tags=27%, list=16%, signal=32%	-0.94523
WP_ALLOGRAFT_REJECTION		16	0.35076	0.944479	0.541176	0.933696	1	1478	tags=31%, list=19%, signal=38%	-0.944479
BROWNE_HCMV_INFECTION_14HR_DN		143	0.229347	0.944334	0.590818	0.93331	1	1053	tags=16%, list=14%, signal=18%	-0.944334
DOUGLAS_BMI1_TARGETS_DN		170	0.223409	0.944311	0.597015	0.932489	1	1413	tags=18%, list=18%, signal=22%	-0.944311
BIOCARTA_EDG1_PATHWAY		17	0.3486	0.944174	0.522901	0.932046	1	2235	tags=53%, list=29%, signal=74%	-0.944174
REACTOME_HEME_SIGNALING		25	0.319235	0.94411	0.552419	0.931384	1	767	tags=20%, list=10%, signal=22%	-0.94411
REACTOME_INHIBITION_OF_DNA_RECOMBINATION_AT_TELOMERE		15	0.358242	0.944015	0.542308	0.930817	1	1206	tags=33%, list=15%, signal=39%	-0.944015
KIM_GERMINAL_CENTER_T_HELPER_UP		37	0.295691	0.943902	0.549902	0.930285	1	1573	tags=30%, list=20%, signal=37%	-0.943902
WP_PHOTODYNAMIC_THERAPYINDUCED_HIF1_SURVIVAL_SIGNALING		18	0.344747	0.943796	0.537864	0.929712	1	1670	tags=44%, list=21%, signal=56%	-0.943796
LUI_THYROID_CANCER_PAX8_PPARG_DN		31	0.306901	0.943774	0.544574	0.928889	1	1702	tags=26%, list=22%, signal=33%	-0.943774
LEI_MYB_TARGETS		147	0.227812	0.943527	0.600783	0.928798	1	1394	tags=22%, list=18%, signal=26%	-0.943527
REACTOME_BIOSYNTHESIS_OF_THE_N_GLYCAN_PRECURSOR_DOLICHOL_LIPID_LINKED_OLIGOSACCHARIDE_LLO_AND_TRANSFER_TO_A_NASCENT_PROTEIN		37	0.292349	0.943371	0.56167	0.928422	1	1058	tags=19%, list=14%, signal=22%	-0.943371
REACTOME_NEUROTRANSMITTER_RECEPTORS_AND_POSTSYNAPTIC_SIGNAL_TRANSMISSION		95	0.24555	0.94333	0.599237	0.92764	1	1082	tags=18%, list=14%, signal=21%	-0.94333
REACTOME_COPII_MEDIATED_VESICLE_TRANSPORT		46	0.282704	0.943182	0.534	0.927269	1	1164	tags=17%, list=15%, signal=20%	-0.943182
REACTOME_TP53_REGULATES_METABOLIC_GENES		55	0.26564	0.943064	0.555102	0.926741	1	1814	tags=27%, list=23%, signal=35%	-0.943064
GAUSSMANN_MLL_AF4_FUSION_TARGETS_A_UP		109	0.238572	0.943018	0.56797	0.92602	1	1285	tags=22%, list=16%, signal=26%	-0.943018
BURTON_ADIPOGENESIS_4		32	0.301731	0.942983	0.552632	0.925261	1	2000	tags=47%, list=26%, signal=63%	-0.942983
REACTOME_SIGNALING_BY_NOTCH4		49	0.270444	0.942558	0.54918	0.925754	1	1677	tags=33%, list=22%, signal=41%	-0.942558
VERHAAK_GLIOBLASTOMA_CLASSICAL		73	0.253907	0.942534	0.559846	0.924954	1	1021	tags=21%, list=13%, signal=23%	-0.942534
WP_MEASLES_VIRUS_INFECTION		55	0.268411	0.94164	0.560928	0.926949	1	1016	tags=16%, list=13%, signal=19%	-0.94164
HILLION_HMGA1B_TARGETS		49	0.276236	0.941607	0.554241	0.926173	1	717	tags=16%, list=9%, signal=18%	-0.941607
JIANG_TIP30_TARGETS_UP		18	0.338697	0.941194	0.532039	0.926581	1	1824	tags=44%, list=23%, signal=58%	-0.941194
REACTOME_RHO_GTPASES_ACTIVATE_PKNS		15	0.359228	0.940889	0.521042	0.926648	1	693	tags=20%, list=9%, signal=22%	-0.940889
SENESE_HDAC1_AND_HDAC2_TARGETS_UP		94	0.247087	0.940776	0.572816	0.926163	1	1123	tags=16%, list=14%, signal=18%	-0.940776
ROY_WOUND_BLOOD_VESSEL_UP		26	0.318956	0.940741	0.566532	0.925419	1	1337	tags=31%, list=17%, signal=37%	-0.940741
WP_CILIOPATHIES		75	0.252498	0.940679	0.568789	0.924781	1	1146	tags=23%, list=15%, signal=26%	-0.940679
YAUCH_HEDGEHOG_SIGNALING_PARACRINE_DN		67	0.259123	0.94034	0.565385	0.925007	1	1773	tags=34%, list=23%, signal=44%	-0.94034
WP_IL5_SIGNALING_PATHWAY		21	0.325439	0.93963	0.557656	0.926407	1	1281	tags=19%, list=16%, signal=23%	-0.93963
CHUNG_BLISTER_CYTOTOXICITY_UP		72	0.256237	0.939107	0.559259	0.927175	1	1140	tags=17%, list=15%, signal=19%	-0.939107
CASORELLI_ACUTE_PROMYELOCYTIC_LEUKEMIA_UP		67	0.257638	0.93909	0.582996	0.926369	1	1118	tags=19%, list=14%, signal=22%	-0.93909
ACEVEDO_LIVER_CANCER_DN		266	0.213867	0.939027	0.659004	0.925712	1	1935	tags=26%, list=25%, signal=33%	-0.939027
MARTENS_TRETINOIN_RESPONSE_UP		181	0.221617	0.938428	0.617261	0.926787	1	1113	tags=16%, list=14%, signal=18%	-0.938428
YAMASHITA_LIVER_CANCER_WITH_EPCAM_UP		33	0.300849	0.937526	0.536383	0.928839	1	802	tags=18%, list=10%, signal=20%	-0.937526
NIKOLSKY_BREAST_CANCER_8Q12_Q22_AMPLICON		62	0.257764	0.936766	0.544231	0.930394	1	681	tags=15%, list=9%, signal=16%	-0.936766
DANG_MYC_TARGETS_DN		17	0.353326	0.936736	0.546748	0.929622	1	1917	tags=41%, list=25%, signal=54%	-0.936736
KEGG_FOCAL_ADHESION		102	0.23888	0.936601	0.598039	0.929183	1	1954	tags=30%, list=25%, signal=40%	-0.936601
PID_HIV_NEF_PATHWAY		19	0.340344	0.936326	0.513462	0.929172	1	1026	tags=26%, list=13%, signal=30%	-0.936326
KEGG_NICOTINATE_AND_NICOTINAMIDE_METABOLISM		15	0.35344	0.936254	0.562738	0.928531	1	352	tags=20%, list=5%, signal=21%	-0.936254
SENESE_HDAC1_AND_HDAC2_TARGETS_DN		91	0.246828	0.936191	0.592668	0.927861	1	1646	tags=25%, list=21%, signal=32%	-0.936191
SUNG_METASTASIS_STROMA_UP		54	0.267727	0.936104	0.582524	0.92726	1	2170	tags=43%, list=28%, signal=59%	-0.936104
IZADPANAH_STEM_CELL_ADIPOSE_VS_BONE_DN		51	0.270781	0.936097	0.559846	0.926426	1	1242	tags=24%, list=16%, signal=28%	-0.936097
MOHANKUMAR_HOXA1_TARGETS_DN		50	0.271828	0.935779	0.575985	0.926618	1	2042	tags=38%, list=26%, signal=51%	-0.935779
WP_ENDOCHONDRAL_OSSIFICATION_WITH_SKELETAL_DYSPLASIAS		22	0.320827	0.935602	0.525591	0.926334	1	732	tags=18%, list=9%, signal=20%	-0.935602
KORKOLA_SEMINOMA_UP		22	0.328768	0.935264	0.565815	0.926546	1	1669	tags=32%, list=21%, signal=40%	-0.935264
PID_AVB3_OPN_PATHWAY		18	0.339104	0.935259	0.560636	0.925711	1	2134	tags=44%, list=27%, signal=61%	-0.935259
SUNG_METASTASIS_STROMA_DN		21	0.330107	0.935223	0.527197	0.924984	1	461	tags=14%, list=6%, signal=15%	-0.935223
CERVERA_SDHB_TARGETS_2		44	0.274707	0.934917	0.601594	0.92509	1	1879	tags=30%, list=24%, signal=39%	-0.934917
YAMASHITA_LIVER_CANCER_STEM_CELL_UP		19	0.339671	0.934698	0.560547	0.924971	1	1948	tags=37%, list=25%, signal=49%	-0.934698
REACTOME_CELL_CYCLE		319	0.208686	0.934361	0.679928	0.925209	1	1478	tags=23%, list=19%, signal=27%	-0.934361
PID_IFNG_PATHWAY		20	0.330785	0.934335	0.540084	0.924442	1	1890	tags=35%, list=24%, signal=46%	-0.934335
MOLENAAR_TARGETS_OF_CCND1_AND_CDK4_DN		15	0.362465	0.934191	0.533708	0.924052	1	1088	tags=27%, list=14%, signal=31%	-0.934191
WELCSH_BRCA1_TARGETS_UP		118	0.231647	0.932968	0.622824	0.927074	1	1246	tags=19%, list=16%, signal=22%	-0.932968
REACTOME_SIGNALING_BY_ERBB2		24	0.323819	0.932729	0.569697	0.926982	1	1978	tags=38%, list=25%, signal=50%	-0.932729
CHARAFE_BREAST_CANCER_LUMINAL_VS_BASAL_DN		203	0.219985	0.932674	0.633776	0.926304	1	1674	tags=26%, list=21%, signal=32%	-0.932674
REACTOME_NEUTROPHIL_DEGRANULATION		248	0.215093	0.932633	0.673004	0.925594	1	1777	tags=25%, list=23%, signal=31%	-0.932633
DURAND_STROMA_NS_UP		64	0.260445	0.931498	0.58365	0.928303	1	986	tags=17%, list=13%, signal=20%	-0.931498
COULOUARN_TEMPORAL_TGFB1_SIGNATURE_UP		58	0.262329	0.93135	0.598837	0.927926	1	1413	tags=26%, list=18%, signal=31%	-0.93135
REACTOME_DEGRADATION_OF_DVL		43	0.282751	0.931343	0.579848	0.927108	1	1677	tags=33%, list=22%, signal=41%	-0.931343
REACTOME_FGFR2_MUTANT_RECEPTOR_ACTIVATION		15	0.349772	0.931256	0.546778	0.926529	1	1068	tags=27%, list=14%, signal=31%	-0.931256
ZAMORA_NOS2_TARGETS_DN		41	0.278005	0.930627	0.583004	0.92763	1	2533	tags=44%, list=32%, signal=65%	-0.930627
REACTOME_DEGRADATION_OF_AXIN		43	0.276439	0.930558	0.555133	0.927006	1	1677	tags=30%, list=22%, signal=38%	-0.930558
WP_IL18_SIGNALING_PATHWAY		122	0.232368	0.93045	0.62089	0.926521	1	1027	tags=16%, list=13%, signal=18%	-0.93045
KEGG_PATHWAYS_IN_CANCER		128	0.229195	0.93001	0.661654	0.927066	1	2027	tags=29%, list=26%, signal=38%	-0.93001
JAZAG_TGFB1_SIGNALING_VIA_SMAD4_DN		24	0.313398	0.929971	0.552941	0.926344	1	1515	tags=29%, list=19%, signal=36%	-0.929971
ROVERSI_GLIOMA_COPY_NUMBER_UP		41	0.282273	0.929922	0.564202	0.925661	1	1176	tags=22%, list=15%, signal=26%	-0.929922
WP_ENDOCHONDRAL_OSSIFICATION		22	0.320827	0.929847	0.577603	0.925054	1	732	tags=18%, list=9%, signal=20%	-0.929847
REACTOME_NUCLEAR_ENVELOPE_NE_REASSEMBLY		52	0.27257	0.929767	0.599594	0.924466	1	1643	tags=33%, list=21%, signal=41%	-0.929767
BROWNE_HCMV_INFECTION_24HR_DN		64	0.257037	0.929237	0.594542	0.925348	1	1003	tags=19%, list=13%, signal=21%	-0.929237
SHEDDEN_LUNG_CANCER_GOOD_SURVIVAL_A5		35	0.292691	0.929199	0.579568	0.924642	1	691	tags=14%, list=9%, signal=16%	-0.929199
WAKABAYASHI_ADIPOGENESIS_PPARG_BOUND_8D		352	0.20329	0.928275	0.714836	0.926714	1	2074	tags=30%, list=27%, signal=39%	-0.928275
APPIERTO_RESPONSE_TO_FENRETINIDE_UP		24	0.316902	0.928206	0.562376	0.926092	1	1403	tags=33%, list=18%, signal=41%	-0.928206
KEGG_PROTEASOME		38	0.281417	0.928149	0.596457	0.925451	1	1677	tags=32%, list=22%, signal=40%	-0.928149
WP_ENDOTHELIN_PATHWAYS		15	0.359394	0.92746	0.558648	0.926795	1	2033	tags=33%, list=26%, signal=45%	-0.92746
LEONARD_HYPOXIA		16	0.347004	0.927316	0.570281	0.926381	1	1670	tags=50%, list=21%, signal=63%	-0.927316
LEIN_LOCALIZED_TO_PROXIMAL_DENDRITES		24	0.310552	0.92721	0.570874	0.925889	1	1336	tags=25%, list=17%, signal=30%	-0.92721
REACTOME_RECRUITMENT_OF_NUMA_TO_MITOTIC_CENTROSOMES		42	0.277916	0.927101	0.566191	0.925414	1	1860	tags=33%, list=24%, signal=44%	-0.927101
BOSCO_ALLERGEN_INDUCED_TH2_ASSOCIATED_MODULE		50	0.271815	0.926289	0.577236	0.927105	1	1421	tags=28%, list=18%, signal=34%	-0.926289
BONOME_OVARIAN_CANCER_SURVIVAL_OPTIMAL_DEBULKING		117	0.230592	0.925982	0.604962	0.927268	1	1691	tags=28%, list=22%, signal=35%	-0.925982
WP_NAD_METABOLISM_IN_ONCOGENEINDUCED_SENESCENCE_AND_MITOCHONDRIAL_DYSFUNCTIONASSOCIATED_SENESCENCE		15	0.349401	0.9256	0.534791	0.927671	1	646	tags=20%, list=8%, signal=22%	-0.9256
REACTOME_DNA_REPLICATION_PRE_INITIATION		60	0.261424	0.925575	0.6125	0.926943	1	1966	tags=32%, list=25%, signal=42%	-0.925575
REACTOME_MAPK6_MAPK4_SIGNALING		52	0.267911	0.92551	0.597585	0.926328	1	1798	tags=31%, list=23%, signal=40%	-0.92551
REACTOME_SPHINGOLIPID_METABOLISM		49	0.26896	0.925492	0.581132	0.925552	1	888	tags=14%, list=11%, signal=16%	-0.925492
WANG_RESPONSE_TO_GSK3_INHIBITOR_SB216763_UP		137	0.228908	0.925437	0.665362	0.924907	1	932	tags=15%, list=12%, signal=17%	-0.925437
KEGG_LONG_TERM_POTENTIATION		32	0.294419	0.92529	0.572266	0.924558	1	1021	tags=25%, list=13%, signal=29%	-0.92529
FOROUTAN_INTEGRATED_TGFB_EMT_DN		27	0.30316	0.925109	0.560297	0.924271	1	1303	tags=26%, list=17%, signal=31%	-0.925109
REACTOME_SIGNALING_BY_FGFR2_IIIA_TM		15	0.349772	0.925041	0.570858	0.923653	1	1068	tags=27%, list=14%, signal=31%	-0.925041
RAMPON_ENRICHED_LEARNING_ENVIRONMENT_LATE_UP		17	0.342034	0.923975	0.572243	0.926071	1	669	tags=18%, list=9%, signal=19%	-0.923975
KEGG_TIGHT_JUNCTION		58	0.25996	0.923812	0.60198	0.925751	1	2080	tags=33%, list=27%, signal=44%	-0.923812
MOOTHA_PGC		275	0.208711	0.923767	0.699411	0.925058	1	1733	tags=26%, list=22%, signal=32%	-0.923767
REACTOME_TCF_DEPENDENT_SIGNALING_IN_RESPONSE_TO_WNT		90	0.241405	0.923678	0.625	0.924551	1	1677	tags=28%, list=22%, signal=35%	-0.923678
KYNG_DNA_DAMAGE_BY_UV		26	0.307829	0.923455	0.566532	0.924459	1	1439	tags=27%, list=18%, signal=33%	-0.923455
JIANG_HYPOXIA_VIA_VHL		15	0.346205	0.923056	0.565891	0.924901	1	1351	tags=27%, list=17%, signal=32%	-0.923056
KANG_IMMORTALIZED_BY_TERT_DN		41	0.275933	0.922537	0.573441	0.925671	1	2150	tags=44%, list=28%, signal=60%	-0.922537
PID_AR_PATHWAY		35	0.286303	0.922204	0.571992	0.925901	1	1274	tags=26%, list=16%, signal=31%	-0.922204
SWEET_KRAS_ONCOGENIC_SIGNATURE		47	0.267395	0.922129	0.603206	0.925321	1	2312	tags=43%, list=30%, signal=60%	-0.922129
MIKKELSEN_MEF_LCP_WITH_H3K4ME3		52	0.266124	0.922119	0.602794	0.924543	1	1920	tags=29%, list=25%, signal=38%	-0.922119
GROSS_HYPOXIA_VIA_HIF1A_UP		50	0.265292	0.921751	0.586066	0.924894	1	1854	tags=34%, list=24%, signal=44%	-0.921751
PID_ARF6_TRAFFICKING_PATHWAY		31	0.291615	0.921697	0.594175	0.924255	1	2020	tags=35%, list=26%, signal=48%	-0.921697
REACTOME_DISEASES_OF_DNA_REPAIR		19	0.33326	0.921377	0.577735	0.924416	1	2115	tags=42%, list=27%, signal=58%	-0.921377
IVANOVA_HEMATOPOIESIS_LATE_PROGENITOR		241	0.21037	0.921304	0.689788	0.923844	1	1889	tags=27%, list=24%, signal=34%	-0.921304
WP_THYROID_STIMULATING_HORMONE_TSH_SIGNALING_PATHWAY		36	0.286327	0.920847	0.565657	0.924489	1	1680	tags=33%, list=22%, signal=42%	-0.920847
JOHNSTONE_PARVB_TARGETS_1_DN		32	0.292948	0.920449	0.600807	0.924876	1	1602	tags=31%, list=21%, signal=39%	-0.920449
LIM_MAMMARY_STEM_CELL_UP		231	0.211451	0.91968	0.6742	0.926362	1	1067	tags=14%, list=14%, signal=16%	-0.91968
REACTOME_CYTOSOLIC_SENSORS_OF_PATHOGEN_ASSOCIATED_DNA		39	0.285799	0.919351	0.576271	0.926605	1	2095	tags=41%, list=27%, signal=56%	-0.919351
FORTSCHEGGER_PHF8_TARGETS_UP		116	0.229375	0.919231	0.644231	0.926211	1	1737	tags=28%, list=22%, signal=35%	-0.919231
KAYO_CALORIE_RESTRICTION_MUSCLE_UP		54	0.263766	0.919013	0.606178	0.926067	1	717	tags=13%, list=9%, signal=14%	-0.919013
CARRILLOREIXACH_MRS3_VS_LOWER_RISK_HEPATOBLASTOMA_DN		70	0.250457	0.918396	0.637081	0.927148	1	998	tags=19%, list=13%, signal=21%	-0.918396
ZHONG_SECRETOME_OF_LUNG_CANCER_AND_FIBROBLAST		96	0.238477	0.918183	0.643969	0.926976	1	1802	tags=29%, list=23%, signal=37%	-0.918183
DAIRKEE_CANCER_PRONE_RESPONSE_BPA		34	0.288676	0.917697	0.56917	0.927677	1	792	tags=15%, list=10%, signal=16%	-0.917697
REACTOME_UB_SPECIFIC_PROCESSING_PROTEASES		106	0.233803	0.91768	0.656977	0.926933	1	1026	tags=17%, list=13%, signal=19%	-0.91768
WANG_LMO4_TARGETS_DN		232	0.209693	0.917528	0.723938	0.92653	1	943	tags=13%, list=12%, signal=15%	-0.917528
REACTOME_CROSS_PRESENTATION_OF_SOLUBLE_EXOGENOUS_ANTIGENS_ENDOSOMES		42	0.273096	0.91732	0.62475	0.926342	1	1677	tags=31%, list=22%, signal=39%	-0.91732
REACTOME_CELL_CYCLE_CHECKPOINTS		127	0.22706	0.917195	0.660194	0.925921	1	1677	tags=25%, list=22%, signal=32%	-0.917195
SCHUETZ_BREAST_CANCER_DUCTAL_INVASIVE_UP		130	0.22402	0.917173	0.648077	0.925185	1	1303	tags=20%, list=17%, signal=24%	-0.917173
CHENG_RESPONSE_TO_NICKEL_ACETATE		22	0.320881	0.916982	0.593385	0.924958	1	886	tags=18%, list=11%, signal=20%	-0.916982
CUI_TCF21_TARGETS_2_DN		427	0.197693	0.916496	0.775148	0.925586	1	1351	tags=17%, list=17%, signal=19%	-0.916496
MORI_PLASMA_CELL_UP		34	0.284889	0.916259	0.581162	0.925469	1	1118	tags=18%, list=14%, signal=21%	-0.916259
WP_PURINE_METABOLISM_AND_RELATED_DISORDERS		18	0.329503	0.915819	0.584416	0.926005	1	2104	tags=50%, list=27%, signal=68%	-0.915819
REACTOME_SARS_COV_2_HOST_INTERACTIONS		133	0.225253	0.915789	0.680894	0.925281	1	1016	tags=15%, list=13%, signal=17%	-0.915789
BORCZUK_MALIGNANT_MESOTHELIOMA_UP		200	0.212839	0.915781	0.728489	0.924522	1	1314	tags=19%, list=17%, signal=22%	-0.915781
REACTOME_DEFECTIVE_INTRINSIC_PATHWAY_FOR_APOPTOSIS		15	0.358977	0.915486	0.59802	0.924658	1	899	tags=20%, list=12%, signal=23%	-0.915486
REACTOME_FORMATION_OF_TC_NER_PRE_INCISION_COMPLEX		41	0.276367	0.915345	0.609375	0.924294	1	1221	tags=24%, list=16%, signal=29%	-0.915345
CAFFAREL_RESPONSE_TO_THC_24HR_5_DN		25	0.308765	0.915312	0.557282	0.923592	1	1153	tags=20%, list=15%, signal=23%	-0.915312
REACTOME_COPI_INDEPENDENT_GOLGI_TO_ER_RETROGRADE_TRAFFIC		27	0.305148	0.91515	0.582846	0.923269	1	1082	tags=19%, list=14%, signal=21%	-0.91515
OUILLETTE_CLL_13Q14_DELETION_DN		23	0.318232	0.91486	0.588822	0.923287	1	1597	tags=22%, list=20%, signal=27%	-0.91486
ELVIDGE_HYPOXIA_DN		95	0.23693	0.913209	0.652083	0.927462	1	1121	tags=20%, list=14%, signal=23%	-0.913209
LIN_APC_TARGETS		37	0.279891	0.912469	0.608434	0.928895	1	721	tags=14%, list=9%, signal=15%	-0.912469
FIGUEROA_AML_METHYLATION_CLUSTER_1_UP		49	0.269086	0.912154	0.60076	0.92901	1	1729	tags=29%, list=22%, signal=36%	-0.912154
MCBRYAN_PUBERTAL_TGFB1_TARGETS_DN		24	0.310485	0.911427	0.602317	0.93035	1	1739	tags=29%, list=22%, signal=37%	-0.911427
IWANAGA_CARCINOGENESIS_BY_KRAS_PTEN_UP		77	0.241051	0.91131	0.659004	0.92991	1	959	tags=17%, list=12%, signal=19%	-0.91131
PEDERSEN_METASTASIS_BY_ERBB2_ISOFORM_4		39	0.277322	0.911303	0.616302	0.92915	1	1931	tags=31%, list=25%, signal=41%	-0.911303
SHEDDEN_LUNG_CANCER_GOOD_SURVIVAL_A4		79	0.243431	0.910946	0.662745	0.929368	1	575	tags=9%, list=7%, signal=9%	-0.910946
REACTOME_SCF_BETA_TRCP_MEDIATED_DEGRADATION_OF_EMI1		43	0.270013	0.910415	0.58046	0.93017	1	1677	tags=33%, list=22%, signal=41%	-0.910415
TAKAO_RESPONSE_TO_UVB_RADIATION_UP		51	0.261032	0.910308	0.623984	0.929701	1	922	tags=18%, list=12%, signal=20%	-0.910308
REACTOME_TRANSMISSION_ACROSS_CHEMICAL_SYNAPSES		135	0.224349	0.909541	0.671287	0.931175	1	1082	tags=16%, list=14%, signal=18%	-0.909541
ROZANOV_MMP14_TARGETS_UP		113	0.224881	0.909324	0.688623	0.931022	1	754	tags=12%, list=10%, signal=13%	-0.909324
WP_VEGFAVEGFR2_SIGNALING_PATHWAY		282	0.204096	0.909171	0.779439	0.930715	1	2040	tags=31%, list=26%, signal=40%	-0.909171
PEREZ_TP53_AND_TP63_TARGETS		68	0.245578	0.909084	0.653697	0.9302	1	1020	tags=18%, list=13%, signal=20%	-0.909084
LUI_TARGETS_OF_PAX8_PPARG_FUSION		21	0.31247	0.908778	0.578337	0.930299	1	594	tags=14%, list=8%, signal=15%	-0.908778
PID_TAP63_PATHWAY		19	0.327964	0.908723	0.572327	0.929677	1	2104	tags=32%, list=27%, signal=43%	-0.908723
PEART_HDAC_PROLIFERATION_CLUSTER_DN		36	0.280302	0.908205	0.605372	0.930418	1	510	tags=11%, list=7%, signal=12%	-0.908205
VANTVEER_BREAST_CANCER_BRCA1_DN		21	0.320253	0.908137	0.591093	0.929831	1	942	tags=24%, list=12%, signal=27%	-0.908137
ACEVEDO_LIVER_CANCER_WITH_H3K9ME3_UP		39	0.278852	0.907675	0.619608	0.930416	1	879	tags=21%, list=11%, signal=23%	-0.907675
FLECHNER_BIOPSY_KIDNEY_TRANSPLANT_REJECTED_VS_OK_UP		30	0.291771	0.907134	0.603586	0.931232	1	875	tags=17%, list=11%, signal=19%	-0.907134
WP_PDGF_PATHWAY		26	0.303569	0.90615	0.598361	0.933295	1	87	tags=8%, list=1%, signal=8%	-0.90615
BYSTRYKH_HEMATOPOIESIS_STEM_CELL_QTL_TRANS		401	0.196802	0.905879	0.800384	0.933308	1	1624	tags=21%, list=21%, signal=25%	-0.905879
KEGG_FC_GAMMA_R_MEDIATED_PHAGOCYTOSIS		60	0.252412	0.90578	0.635246	0.93281	1	1788	tags=33%, list=23%, signal=43%	-0.90578
FOSTER_KDM1A_TARGETS_DN		104	0.23432	0.905727	0.652778	0.932171	1	1332	tags=21%, list=17%, signal=25%	-0.905727
BLANCO_MELO_BETA_INTERFERON_TREATED_BRONCHIAL_EPITHELIAL_CELLS_UP		126	0.224173	0.90478	0.687037	0.934126	1	1862	tags=26%, list=24%, signal=34%	-0.90478
KEGG_ETHER_LIPID_METABOLISM		18	0.326806	0.904719	0.621013	0.933524	1	2073	tags=39%, list=27%, signal=53%	-0.904719
REACTOME_SARS_COV_1_INFECTION		28	0.3003	0.90326	0.61477	0.936978	1	1831	tags=32%, list=23%, signal=42%	-0.90326
DURCHDEWALD_SKIN_CARCINOGENESIS_UP		34	0.281603	0.90321	0.655238	0.936328	1	1984	tags=32%, list=25%, signal=43%	-0.90321
PID_PI3KCI_AKT_PATHWAY		18	0.322742	0.902892	0.585603	0.936445	1	868	tags=22%, list=11%, signal=25%	-0.902892
RICKMAN_HEAD_AND_NECK_CANCER_C		23	0.310526	0.902113	0.61157	0.937863	1	180	tags=9%, list=2%, signal=9%	-0.902113
GU_PDEF_TARGETS_UP		35	0.278871	0.901985	0.614943	0.937472	1	1896	tags=31%, list=24%, signal=41%	-0.901985
COULOUARN_TEMPORAL_TGFB1_SIGNATURE_DN		67	0.245525	0.90167	0.666667	0.937577	1	1731	tags=27%, list=22%, signal=34%	-0.90167
IVANOVA_HEMATOPOIESIS_MATURE_CELL		151	0.218975	0.901196	0.743434	0.938102	1	1495	tags=23%, list=19%, signal=27%	-0.901196
REACTOME_CYCLIN_D_ASSOCIATED_EVENTS_IN_G1		17	0.335497	0.900741	0.613153	0.938656	1	1324	tags=29%, list=17%, signal=35%	-0.900741
KEGG_RNA_POLYMERASE		19	0.326296	0.90034	0.586614	0.939036	1	2095	tags=42%, list=27%, signal=57%	-0.90034
NUYTTEN_EZH2_TARGETS_DN		496	0.191898	0.900057	0.85205	0.939052	1	1357	tags=18%, list=17%, signal=21%	-0.900057
REACTOME_RNA_POLYMERASE_III_TRANSCRIPTION		24	0.306423	0.898979	0.60735	0.941383	1	2544	tags=50%, list=33%, signal=74%	-0.898979
ROESSLER_LIVER_CANCER_METASTASIS_UP		56	0.252219	0.898931	0.659774	0.94076	1	1298	tags=21%, list=17%, signal=26%	-0.898931
KEGG_ARACHIDONIC_ACID_METABOLISM		19	0.321337	0.898516	0.610266	0.941198	1	2131	tags=42%, list=27%, signal=58%	-0.898516
NOUSHMEHR_GBM_SILENCED_BY_METHYLATION		17	0.333137	0.898511	0.60241	0.940433	1	1323	tags=29%, list=17%, signal=35%	-0.898511
DELASERNA_MYOD_TARGETS_UP		36	0.279862	0.898496	0.624016	0.939694	1	872	tags=17%, list=11%, signal=19%	-0.898496
REACTOME_RHO_GTPASES_ACTIVATE_FORMINS		63	0.25159	0.898248	0.688462	0.939591	1	1977	tags=33%, list=25%, signal=44%	-0.898248
HOFFMANN_SMALL_PRE_BII_TO_IMMATURE_B_LYMPHOCYTE_UP		28	0.295066	0.897017	0.633663	0.942273	1	2331	tags=46%, list=30%, signal=66%	-0.897017
VANOEVELEN_MYOGENESIS_SIN3A_TARGETS		123	0.22326	0.896819	0.7154	0.942039	1	2035	tags=29%, list=26%, signal=39%	-0.896819
BRUINS_UVC_RESPONSE_MIDDLE		42	0.26497	0.896651	0.639922	0.941744	1	2022	tags=38%, list=26%, signal=51%	-0.896651
GRUETZMANN_PANCREATIC_CANCER_UP		199	0.210776	0.896159	0.751491	0.942316	1	1745	tags=26%, list=22%, signal=33%	-0.896159
GAVIN_FOXP3_TARGETS_CLUSTER_P4		40	0.26697	0.896059	0.650307	0.94183	1	1897	tags=35%, list=24%, signal=46%	-0.896059
ROSS_AML_WITH_AML1_ETO_FUSION		26	0.30218	0.895902	0.610672	0.941488	1	1532	tags=31%, list=20%, signal=38%	-0.895902
NAKAMURA_TUMOR_ZONE_PERIPHERAL_VS_CENTRAL_DN		290	0.200396	0.895479	0.804223	0.941931	1	493	tags=10%, list=6%, signal=10%	-0.895479
MARSON_FOXP3_TARGETS_UP		35	0.276335	0.894156	0.629559	0.944856	1	1469	tags=29%, list=19%, signal=35%	-0.894156
REACTOME_COLLAGEN_FORMATION		29	0.288872	0.893661	0.614314	0.945454	1	1988	tags=38%, list=25%, signal=51%	-0.893661
KERLEY_RESPONSE_TO_CISPLATIN_UP		16	0.329639	0.892779	0.611002	0.947183	1	1920	tags=38%, list=25%, signal=50%	-0.892779
HADDAD_T_LYMPHOCYTE_AND_NK_PROGENITOR_UP		39	0.271349	0.892705	0.659319	0.946575	1	999	tags=15%, list=13%, signal=18%	-0.892705
REACTOME_PROTEIN_FOLDING		54	0.25474	0.892568	0.630975	0.946193	1	2425	tags=48%, list=31%, signal=69%	-0.892568
REACTOME_INTERLEUKIN_4_AND_INTERLEUKIN_13_SIGNALING		32	0.287077	0.892399	0.602713	0.945873	1	1030	tags=22%, list=13%, signal=25%	-0.892399
REACTOME_COPI_MEDIATED_ANTEROGRADE_TRANSPORT		57	0.251325	0.892331	0.669355	0.94529	1	484	tags=9%, list=6%, signal=9%	-0.892331
WP_ECTODERM_DIFFERENTIATION		66	0.246842	0.891595	0.702448	0.946599	1	1609	tags=27%, list=21%, signal=34%	-0.891595
REACTOME_INTERLEUKIN_2_FAMILY_SIGNALING		18	0.32527	0.89085	0.621677	0.947979	1	2891	tags=39%, list=37%, signal=62%	-0.89085
LINDSTEDT_DENDRITIC_CELL_MATURATION_C		30	0.280764	0.890495	0.642276	0.948207	1	1138	tags=20%, list=15%, signal=23%	-0.890495
FARMER_BREAST_CANCER_BASAL_VS_LULMINAL		142	0.218578	0.890074	0.744048	0.948665	1	873	tags=14%, list=11%, signal=16%	-0.890074
CREIGHTON_ENDOCRINE_THERAPY_RESISTANCE_5		248	0.203	0.889954	0.789062	0.948232	1	1549	tags=23%, list=20%, signal=28%	-0.889954
MEBARKI_HCC_PROGENITOR_WNT_UP		63	0.246552	0.889839	0.649706	0.947773	1	912	tags=19%, list=12%, signal=21%	-0.889839
RYAN_MANTLE_CELL_LYMPHOMA_NOTCH_DIRECT_UP		49	0.262906	0.88981	0.659708	0.947095	1	1660	tags=33%, list=21%, signal=41%	-0.88981
AZARE_STAT3_TARGETS		16	0.333036	0.889777	0.612403	0.946415	1	810	tags=25%, list=10%, signal=28%	-0.889777
REACTOME_AURKA_ACTIVATION_BY_TPX2		34	0.278241	0.889665	0.641975	0.945965	1	1450	tags=26%, list=19%, signal=32%	-0.889665
LI_LUNG_CANCER		21	0.313186	0.889093	0.627859	0.946765	1	1390	tags=29%, list=18%, signal=35%	-0.889093
FERRANDO_T_ALL_WITH_MLL_ENL_FUSION_DN		48	0.25947	0.888243	0.687161	0.948286	1	1118	tags=23%, list=14%, signal=27%	-0.888243
TONKS_TARGETS_OF_RUNX1_RUNX1T1_FUSION_MONOCYTE_UP		113	0.221367	0.888092	0.729941	0.947925	1	1695	tags=26%, list=22%, signal=32%	-0.888092
KONDO_PROSTATE_CANCER_HCP_WITH_H3K27ME3		32	0.285278	0.888015	0.658869	0.94738	1	1184	tags=25%, list=15%, signal=29%	-0.888015
REACTOME_PROGRAMMED_CELL_DEATH		122	0.221855	0.888006	0.725338	0.946641	1	1992	tags=31%, list=26%, signal=41%	-0.888006
BOQUEST_STEM_CELL_DN		80	0.233891	0.887909	0.68714	0.946177	1	824	tags=16%, list=11%, signal=18%	-0.887909
REACTOME_CELLULAR_RESPONSES_TO_STIMULI		458	0.190704	0.887404	0.902439	0.946742	1	966	tags=13%, list=12%, signal=14%	-0.887404
GARCIA_TARGETS_OF_FLI1_AND_DAX1_DN		80	0.24015	0.887257	0.693548	0.946377	1	1443	tags=23%, list=19%, signal=27%	-0.887257
BOYAULT_LIVER_CANCER_SUBCLASS_G2		19	0.325306	0.886599	0.615694	0.947437	1	955	tags=21%, list=12%, signal=24%	-0.886599
PID_LIS1_PATHWAY		22	0.30669	0.886251	0.656371	0.947612	1	2073	tags=41%, list=27%, signal=56%	-0.886251
TSENG_IRS1_TARGETS_UP		51	0.253655	0.885517	0.685114	0.948841	1	1089	tags=20%, list=14%, signal=23%	-0.885517
PID_ECADHERIN_NASCENT_AJ_PATHWAY		29	0.283457	0.885079	0.63786	0.94931	1	1954	tags=34%, list=25%, signal=46%	-0.885079
TSAI_RESPONSE_TO_IONIZING_RADIATION		49	0.257467	0.885004	0.668582	0.948762	1	1867	tags=31%, list=24%, signal=40%	-0.885004
REACTOME_SEPARATION_OF_SISTER_CHROMATIDS		105	0.229964	0.884782	0.710891	0.948596	1	1579	tags=24%, list=20%, signal=29%	-0.884782
ZAMORA_NOS2_TARGETS_UP		27	0.287105	0.884641	0.654412	0.948234	1	1034	tags=26%, list=13%, signal=30%	-0.884641
BERTUCCI_MEDULLARY_VS_DUCTAL_BREAST_CANCER_DN		93	0.228305	0.884482	0.717791	0.947881	1	2171	tags=31%, list=28%, signal=43%	-0.884482
KIM_MYCN_AMPLIFICATION_TARGETS_UP		45	0.263462	0.884135	0.650672	0.948074	1	1147	tags=22%, list=15%, signal=26%	-0.884135
DUAN_PRDM5_TARGETS		21	0.30693	0.883775	0.642424	0.948273	1	618	tags=14%, list=8%, signal=15%	-0.883775
WAMUNYOKOLI_OVARIAN_CANCER_LMP_DN		97	0.227125	0.882979	0.725869	0.949696	1	1242	tags=20%, list=16%, signal=23%	-0.882979
CHARAFE_BREAST_CANCER_LUMINAL_VS_MESENCHYMAL_DN		225	0.204301	0.88287	0.805726	0.949229	1	1674	tags=24%, list=21%, signal=29%	-0.88287
ZHENG_BOUND_BY_FOXP3		235	0.199325	0.882644	0.816901	0.949083	1	1322	tags=19%, list=17%, signal=22%	-0.882644
REACTOME_ER_TO_GOLGI_ANTEROGRADE_TRANSPORT		93	0.22782	0.882025	0.705769	0.949954	1	1164	tags=14%, list=15%, signal=16%	-0.882025
WONG_PROTEASOME_GENE_MODULE		39	0.272958	0.881444	0.666	0.950766	1	1733	tags=28%, list=22%, signal=36%	-0.881444
REACTOME_SIGNALING_BY_PDGF		34	0.275403	0.881197	0.652695	0.950705	1	2039	tags=29%, list=26%, signal=40%	-0.881197
LOPEZ_TRANSLATION_VIA_FN1_SIGNALING		28	0.28959	0.881011	0.639839	0.950454	1	2561	tags=46%, list=33%, signal=69%	-0.881011
REACTOME_G_ALPHA_Z_SIGNALLING_EVENTS		27	0.293516	0.88071	0.636542	0.950535	1	2033	tags=41%, list=26%, signal=55%	-0.88071
KEGG_CITRATE_CYCLE_TCA_CYCLE		25	0.299598	0.880598	0.648703	0.95008	1	2437	tags=32%, list=31%, signal=46%	-0.880598
ZHAN_MULTIPLE_MYELOMA_LB_UP		20	0.316432	0.880498	0.625	0.949593	1	857	tags=15%, list=11%, signal=17%	-0.880498
GRATIAS_RETINOBLASTOMA_16Q24		15	0.332903	0.880437	0.611588	0.949007	1	1397	tags=33%, list=18%, signal=41%	-0.880437
HOLLMANN_APOPTOSIS_VIA_CD40_DN		132	0.217208	0.879819	0.802947	0.949944	1	1768	tags=27%, list=23%, signal=34%	-0.879819
REACTOME_CYCLIN_A_CDK2_ASSOCIATED_EVENTS_AT_S_PHASE_ENTRY		56	0.249387	0.879708	0.664717	0.949511	1	1677	tags=29%, list=22%, signal=36%	-0.879708
DAVICIONI_MOLECULAR_ARMS_VS_ERMS_UP		178	0.205465	0.879529	0.809619	0.949253	1	1683	tags=24%, list=22%, signal=29%	-0.879529
QUINTENS_EMBRYONIC_BRAIN_RESPONSE_TO_IR		36	0.275823	0.879262	0.692164	0.949197	1	1077	tags=19%, list=14%, signal=22%	-0.879262
BOYAULT_LIVER_CANCER_SUBCLASS_G12_UP		25	0.293995	0.879018	0.654479	0.949108	1	1088	tags=24%, list=14%, signal=28%	-0.879018
REACTOME_M_PHASE		208	0.20176	0.878606	0.812133	0.949433	1	1643	tags=25%, list=21%, signal=30%	-0.878606
REACTOME_SIGNALING_BY_MET		47	0.25714	0.878478	0.683712	0.949028	1	2044	tags=30%, list=26%, signal=40%	-0.878478
WP_MET_IN_TYPE_1_PAPILLARY_RENAL_CELL_CARCINOMA		34	0.274265	0.877951	0.656192	0.949636	1	2374	tags=38%, list=30%, signal=55%	-0.877951
LIU_SOX4_TARGETS_DN		196	0.205458	0.877933	0.811538	0.948932	1	1187	tags=16%, list=15%, signal=18%	-0.877933
KYNG_DNA_DAMAGE_BY_GAMMA_AND_UV_RADIATION		41	0.266001	0.877749	0.677355	0.948677	1	1085	tags=22%, list=14%, signal=25%	-0.877749
ZHAN_MULTIPLE_MYELOMA_MS_DN		19	0.318114	0.877599	0.645418	0.948325	1	195	tags=11%, list=3%, signal=11%	-0.877599
BOYLAN_MULTIPLE_MYELOMA_C_D_UP		73	0.23663	0.877197	0.714851	0.948587	1	1463	tags=23%, list=19%, signal=28%	-0.877197
HELLER_HDAC_TARGETS_SILENCED_BY_METHYLATION_UP		207	0.203878	0.877031	0.783465	0.948275	1	1692	tags=26%, list=22%, signal=32%	-0.877031
KEGG_VASCULAR_SMOOTH_MUSCLE_CONTRACTION		43	0.261641	0.877021	0.656504	0.947554	1	2105	tags=35%, list=27%, signal=48%	-0.877021
WP_GENETIC_CAUSES_OF_PSVDINCPH		18	0.314302	0.877	0.633333	0.94687	1	2054	tags=33%, list=26%, signal=45%	-0.877
TIEN_INTESTINE_PROBIOTICS_2HR_UP		20	0.312093	0.876522	0.629981	0.947375	1	385	tags=10%, list=5%, signal=10%	-0.876522
ONDER_CDH1_SIGNALING_VIA_CTNNB1		37	0.271797	0.875632	0.666016	0.948904	1	1159	tags=16%, list=15%, signal=19%	-0.875632
SMID_BREAST_CANCER_BASAL_DN		298	0.195262	0.875142	0.854962	0.949452	1	1700	tags=23%, list=22%, signal=28%	-0.875142
SCHAEFFER_PROSTATE_DEVELOPMENT_6HR_UP		83	0.234782	0.875048	0.724206	0.948978	1	1391	tags=25%, list=18%, signal=30%	-0.875048
ENK_UV_RESPONSE_EPIDERMIS_UP		154	0.209684	0.874981	0.770751	0.94839	1	1298	tags=19%, list=17%, signal=23%	-0.874981
CARRILLOREIXACH_MRS3_VS_LOWER_RISK_HEPATOBLASTOMA_UP		21	0.308139	0.874946	0.652087	0.947755	1	2045	tags=43%, list=26%, signal=58%	-0.874946
REACTOME_RHOV_GTPASE_CYCLE		24	0.29761	0.874758	0.658103	0.947527	1	946	tags=17%, list=12%, signal=19%	-0.874758
SAKAI_TUMOR_INFILTRATING_MONOCYTES_DN		50	0.253038	0.874624	0.718391	0.947134	1	958	tags=14%, list=12%, signal=16%	-0.874624
ZHONG_SECRETOME_OF_LUNG_CANCER_AND_MACROPHAGE		58	0.246148	0.874295	0.719231	0.947244	1	1556	tags=26%, list=20%, signal=32%	-0.874295
REACTOME_HDR_THROUGH_SINGLE_STRAND_ANNEALING_SSA		16	0.333069	0.873973	0.633197	0.947349	1	703	tags=19%, list=9%, signal=21%	-0.873973
REACTOME_ASSEMBLY_OF_COLLAGEN_FIBRILS_AND_OTHER_MULTIMERIC_STRUCTURES		19	0.31524	0.873724	0.676983	0.947246	1	1867	tags=32%, list=24%, signal=41%	-0.873724
REACTOME_METABOLISM_OF_POLYAMINES		44	0.257506	0.873528	0.695473	0.947031	1	1677	tags=30%, list=22%, signal=37%	-0.873528
HELLER_SILENCED_BY_METHYLATION_DN		46	0.254996	0.873388	0.683301	0.94666	1	1897	tags=35%, list=24%, signal=46%	-0.873388
REACTOME_HDR_THROUGH_HOMOLOGOUS_RECOMBINATION_HRR		22	0.304856	0.873301	0.676471	0.946145	1	2165	tags=36%, list=28%, signal=50%	-0.873301
MORI_PRE_BI_LYMPHOCYTE_DN		41	0.261793	0.872833	0.705882	0.946626	1	1577	tags=17%, list=20%, signal=21%	-0.872833
WANG_CLIM2_TARGETS_UP		112	0.220007	0.872526	0.790099	0.946663	1	1579	tags=24%, list=20%, signal=30%	-0.872526
KIM_RESPONSE_TO_TSA_AND_DECITABINE_UP		49	0.255442	0.872425	0.699561	0.946185	1	1118	tags=18%, list=14%, signal=21%	-0.872425
GAVIN_FOXP3_TARGETS_CLUSTER_P7		40	0.264516	0.872415	0.690945	0.945485	1	1413	tags=30%, list=18%, signal=36%	-0.872415
ELVIDGE_HIF1A_AND_HIF2A_TARGETS_DN		43	0.257019	0.871914	0.672131	0.946034	1	1917	tags=37%, list=25%, signal=49%	-0.871914
PROVENZANI_METASTASIS_UP		107	0.220363	0.871437	0.767308	0.946487	1	2223	tags=33%, list=29%, signal=45%	-0.871437
BIOCARTA_FMLP_PATHWAY		16	0.325934	0.87091	0.650924	0.947063	1	2342	tags=31%, list=30%, signal=45%	-0.87091
QI_HYPOXIA		59	0.244237	0.870637	0.702381	0.946945	1	1651	tags=27%, list=21%, signal=34%	-0.870637
LIU_VMYB_TARGETS_UP		65	0.238594	0.870625	0.735521	0.946255	1	1341	tags=22%, list=17%, signal=26%	-0.870625
REACTOME_CELLULAR_RESPONSE_TO_CHEMICAL_STRESS		128	0.213477	0.868671	0.784585	0.950543	1	1756	tags=27%, list=23%, signal=34%	-0.868671
BENPORATH_EED_TARGETS		311	0.193282	0.868657	0.868275	0.949851	1	1629	tags=23%, list=21%, signal=28%	-0.868657
REACTOME_NEUROTRANSMITTER_RELEASE_CYCLE		33	0.273518	0.868575	0.682836	0.949327	1	615	tags=12%, list=8%, signal=13%	-0.868575
GRADE_COLON_VS_RECTAL_CANCER_UP		20	0.308378	0.868371	0.656189	0.949101	1	1208	tags=25%, list=15%, signal=30%	-0.868371
REACTOME_CELLULAR_RESPONSE_TO_HYPOXIA		51	0.247643	0.868309	0.718254	0.948538	1	1677	tags=29%, list=22%, signal=37%	-0.868309
ZHAN_MULTIPLE_MYELOMA_CD1_DN		19	0.316075	0.868297	0.65392	0.947839	1	1933	tags=32%, list=25%, signal=42%	-0.868297
BYSTRYKH_HEMATOPOIESIS_STEM_CELL_QTL_CIS		79	0.231708	0.868209	0.734406	0.947341	1	949	tags=14%, list=12%, signal=16%	-0.868209
ACEVEDO_NORMAL_TISSUE_ADJACENT_TO_LIVER_TUMOR_UP		97	0.222845	0.867279	0.757225	0.949037	1	1475	tags=25%, list=19%, signal=30%	-0.867279
STEARMAN_LUNG_CANCER_EARLY_VS_LATE_UP		85	0.226982	0.867124	0.788235	0.948711	1	1076	tags=15%, list=14%, signal=18%	-0.867124
WP_ONCOSTATIN_M_SIGNALING_PATHWAY		36	0.270505	0.865887	0.690428	0.951045	1	2016	tags=31%, list=26%, signal=41%	-0.865887
WP_PATHOGENIC_ESCHERICHIA_COLI_INFECTION		25	0.288218	0.865738	0.65415	0.950708	1	2269	tags=44%, list=29%, signal=62%	-0.865738
KIM_MYCN_AMPLIFICATION_TARGETS_DN		48	0.252925	0.86573	0.713693	0.949998	1	1481	tags=29%, list=19%, signal=36%	-0.86573
KEGG_ALDOSTERONE_REGULATED_SODIUM_REABSORPTION		18	0.311118	0.865634	0.65444	0.949519	1	2898	tags=56%, list=37%, signal=88%	-0.865634
LEE_LIVER_CANCER_SURVIVAL_UP		71	0.234469	0.865051	0.723197	0.95028	1	1769	tags=25%, list=23%, signal=32%	-0.865051
CHEN_LVAD_SUPPORT_OF_FAILING_HEART_UP		40	0.262435	0.864691	0.662602	0.95048	1	1824	tags=30%, list=23%, signal=39%	-0.864691
PID_INTEGRIN1_PATHWAY		38	0.262968	0.864432	0.697959	0.950381	1	836	tags=18%, list=11%, signal=21%	-0.864432
LEE_LIVER_CANCER_SURVIVAL_DN		101	0.220144	0.863525	0.799599	0.951808	1	987	tags=18%, list=13%, signal=20%	-0.863525
REACTOME_SYNDECAN_INTERACTIONS		16	0.329784	0.863464	0.649156	0.951246	1	1314	tags=31%, list=17%, signal=38%	-0.863464
GENTILE_UV_RESPONSE_CLUSTER_D6		17	0.315433	0.862721	0.652427	0.952322	1	1137	tags=18%, list=15%, signal=21%	-0.862721
YAO_HOXA10_TARGETS_VIA_PROGESTERONE_UP		31	0.280514	0.86195	0.687755	0.953482	1	835	tags=16%, list=11%, signal=18%	-0.86195
WP_BDNFTRKB_SIGNALING		23	0.295024	0.861923	0.6875	0.952829	1	2040	tags=30%, list=26%, signal=41%	-0.861923
YAGI_AML_FAB_MARKERS		108	0.2181	0.861866	0.782364	0.952256	1	1010	tags=14%, list=13%, signal=16%	-0.861866
CHEBOTAEV_GR_TARGETS_UP		35	0.266219	0.861783	0.684848	0.951731	1	350	tags=9%, list=4%, signal=9%	-0.861783
REACTOME_SCF_SKP2_MEDIATED_DEGRADATION_OF_P27_P21		44	0.25708	0.861508	0.686567	0.951671	1	1677	tags=32%, list=22%, signal=40%	-0.861508
CADWELL_ATG16L1_TARGETS_DN		32	0.27268	0.861302	0.691715	0.951426	1	774	tags=13%, list=10%, signal=14%	-0.861302
MAGRANGEAS_MULTIPLE_MYELOMA_IGLL_VS_IGLK_UP		19	0.310829	0.861295	0.645951	0.950724	1	2044	tags=37%, list=26%, signal=50%	-0.861295
HU_ANGIOGENESIS_DN		24	0.290281	0.861241	0.689524	0.950135	1	1984	tags=38%, list=25%, signal=50%	-0.861241
FUJII_YBX1_TARGETS_UP		15	0.333772	0.860561	0.656746	0.951015	1	822	tags=13%, list=11%, signal=15%	-0.860561
HUANG_GATA2_TARGETS_UP		62	0.242953	0.860505	0.730612	0.950441	1	1737	tags=37%, list=22%, signal=47%	-0.860505
ONDER_CDH1_TARGETS_2_UP		129	0.21163	0.859912	0.819802	0.951161	1	1027	tags=15%, list=13%, signal=17%	-0.859912
TONKS_TARGETS_OF_RUNX1_RUNX1T1_FUSION_HSC_UP		77	0.229481	0.859791	0.774067	0.950757	1	2121	tags=40%, list=27%, signal=55%	-0.859791
DIRMEIER_LMP1_RESPONSE_EARLY		23	0.294823	0.859327	0.6875	0.951155	1	1809	tags=30%, list=23%, signal=40%	-0.859327
SMID_BREAST_CANCER_LUMINAL_B_UP		75	0.231745	0.858243	0.774648	0.95296	1	367	tags=8%, list=5%, signal=8%	-0.858243
DANG_REGULATED_BY_MYC_DN		141	0.20821	0.858165	0.832335	0.952438	1	1702	tags=23%, list=22%, signal=29%	-0.858165
WP_AMPACTIVATED_PROTEIN_KINASE_SIGNALING		37	0.26922	0.858051	0.705996	0.95201	1	2375	tags=41%, list=30%, signal=58%	-0.858051
REACTOME_SIGNALING_BY_FGFR2		38	0.263417	0.857971	0.720703	0.951479	1	2095	tags=32%, list=27%, signal=43%	-0.857971
SESTO_RESPONSE_TO_UV_C7		37	0.262401	0.857765	0.705411	0.951262	1	948	tags=19%, list=12%, signal=21%	-0.857765
BLANCO_MELO_HUMAN_PARAINFLUENZA_VIRUS_3_INFECTION_A594_CELLS_UP		49	0.250114	0.85773	0.708171	0.950621	1	943	tags=18%, list=12%, signal=21%	-0.85773
BLANCO_MELO_COVID19_SARS_COV_2_INFECTION_A594_ACE2_EXPRESSING_CELLS_DN		44	0.252679	0.856747	0.710173	0.952175	1	843	tags=11%, list=11%, signal=13%	-0.856747
ODONNELL_TARGETS_OF_MYC_AND_TFRC_UP		23	0.297882	0.8565	0.689922	0.952041	1	1546	tags=30%, list=20%, signal=38%	-0.8565
TERAMOTO_OPN_TARGETS_CLUSTER_6		16	0.324681	0.856271	0.656	0.951916	1	1739	tags=38%, list=22%, signal=48%	-0.856271
ACEVEDO_LIVER_CANCER_WITH_H3K27ME3_UP		88	0.226337	0.855869	0.777555	0.952139	1	1764	tags=26%, list=23%, signal=33%	-0.855869
KEGG_TYROSINE_METABOLISM		17	0.319	0.855846	0.647059	0.95148	1	1602	tags=24%, list=21%, signal=30%	-0.855846
REACTOME_POTENTIAL_THERAPEUTICS_FOR_SARS		60	0.242487	0.855291	0.752437	0.952074	1	1163	tags=23%, list=15%, signal=27%	-0.855291
WP_CILIARY_LANDSCAPE		144	0.206784	0.855102	0.840909	0.951809	1	1467	tags=22%, list=19%, signal=26%	-0.855102
NAM_FXYD5_TARGETS_DN		15	0.324474	0.854314	0.642424	0.952966	1	1833	tags=33%, list=24%, signal=43%	-0.854314
REACTOME_REGULATION_OF_RUNX2_EXPRESSION_AND_ACTIVITY		51	0.247196	0.854163	0.738372	0.952615	1	1677	tags=29%, list=22%, signal=37%	-0.854163
PID_MET_PATHWAY		55	0.243517	0.853789	0.736634	0.952789	1	2190	tags=40%, list=28%, signal=55%	-0.853789
GINESTIER_BREAST_CANCER_ZNF217_AMPLIFIED_UP		39	0.260976	0.853608	0.71639	0.95251	1	821	tags=15%, list=11%, signal=17%	-0.853608
MCCLUNG_DELTA_FOSB_TARGETS_2WK		27	0.282778	0.853115	0.720792	0.952932	1	1956	tags=37%, list=25%, signal=49%	-0.853115
FIGUEROA_AML_METHYLATION_CLUSTER_4_UP		47	0.253704	0.853031	0.753012	0.952405	1	2350	tags=43%, list=30%, signal=61%	-0.853031
GRYDER_PAX3FOXO1_ENHANCERS_KO_DOWN		241	0.194837	0.852073	0.89225	0.953972	1	1888	tags=25%, list=24%, signal=32%	-0.852073
GROSS_ELK3_TARGETS_DN		16	0.319657	0.850719	0.657948	0.956406	1	1419	tags=31%, list=18%, signal=38%	-0.850719
BROWNE_HCMV_INFECTION_1HR_DN		99	0.216495	0.850681	0.822394	0.955785	1	1463	tags=22%, list=19%, signal=27%	-0.850681
REACTOME_METABOLISM_OF_STEROIDS		80	0.222793	0.850379	0.751953	0.955796	1	2048	tags=34%, list=26%, signal=45%	-0.850379
GENTILE_UV_LOW_DOSE_DN		37	0.266567	0.849884	0.720755	0.95623	1	2150	tags=35%, list=28%, signal=48%	-0.849884
WP_HISTONE_MODIFICATIONS		21	0.304767	0.849135	0.711501	0.957228	1	1	tags=5%, list=0%, signal=5%	-0.849135
REACTOME_MITOTIC_PROMETAPHASE		97	0.220041	0.849074	0.781482	0.956656	1	1478	tags=24%, list=19%, signal=29%	-0.849074
LEE_LIVER_CANCER_CIPROFIBRATE_UP		26	0.289092	0.848609	0.675351	0.957037	1	1193	tags=23%, list=15%, signal=27%	-0.848609
LEE_LIVER_CANCER_MYC_E2F1_DN		20	0.304863	0.848442	0.708	0.956726	1	2786	tags=55%, list=36%, signal=85%	-0.848442
YAO_TEMPORAL_RESPONSE_TO_PROGESTERONE_CLUSTER_13		125	0.210852	0.84778	0.8577	0.957529	1	1140	tags=17%, list=15%, signal=19%	-0.84778
MARZEC_IL2_SIGNALING_UP		38	0.25859	0.846079	0.713163	0.960707	1	2437	tags=50%, list=31%, signal=72%	-0.846079
KYNG_DNA_DAMAGE_BY_4NQO		19	0.301402	0.845326	0.704762	0.961722	1	1517	tags=37%, list=19%, signal=46%	-0.845326
GRAHAM_CML_QUIESCENT_VS_NORMAL_DIVIDING_UP		15	0.322894	0.844754	0.694	0.962242	1	955	tags=27%, list=12%, signal=30%	-0.844754
KEGG_PATHOGENIC_ESCHERICHIA_COLI_INFECTION		25	0.288218	0.844734	0.734694	0.961582	1	2269	tags=44%, list=29%, signal=62%	-0.844734
EBAUER_TARGETS_OF_PAX3_FOXO1_FUSION_UP		82	0.222803	0.844104	0.798742	0.962285	1	2025	tags=33%, list=26%, signal=44%	-0.844104
IKEDA_MIR1_TARGETS_UP		32	0.264402	0.843464	0.734579	0.962985	1	1281	tags=25%, list=16%, signal=30%	-0.843464
REACTOME_REGULATION_OF_PTEN_GENE_TRANSCRIPTION		34	0.264789	0.84286	0.741177	0.963597	1	966	tags=18%, list=12%, signal=20%	-0.84286
YAGI_AML_SURVIVAL		67	0.227334	0.842298	0.793307	0.964142	1	1590	tags=24%, list=20%, signal=30%	-0.842298
HOSHIDA_LIVER_CANCER_LATE_RECURRENCE_DN		35	0.264405	0.841965	0.737864	0.964169	1	818	tags=14%, list=10%, signal=16%	-0.841965
WP_JOUBERT_SYNDROME		46	0.250044	0.841699	0.75188	0.964055	1	1257	tags=24%, list=16%, signal=28%	-0.841699
PUIFFE_INVASION_INHIBITED_BY_ASCITES_DN		84	0.22374	0.841299	0.816092	0.964217	1	1395	tags=25%, list=18%, signal=30%	-0.841299
WEI_MIR34A_TARGETS		87	0.223706	0.841107	0.797244	0.963932	1	964	tags=17%, list=12%, signal=19%	-0.841107
JAZAG_TGFB1_SIGNALING_DN		18	0.310381	0.840695	0.675624	0.964163	1	1295	tags=22%, list=17%, signal=27%	-0.840695
ALCALA_APOPTOSIS		53	0.242642	0.840464	0.76616	0.963946	1	1054	tags=19%, list=14%, signal=22%	-0.840464
REACTOME_SIGNALING_BY_GPCR		207	0.196256	0.840034	0.916179	0.964196	1	1621	tags=24%, list=21%, signal=30%	-0.840034
WP_LEPTIN_SIGNALING_PATHWAY		45	0.243384	0.839896	0.755424	0.963812	1	2016	tags=31%, list=26%, signal=42%	-0.839896
PID_PDGFRA_PATHWAY		16	0.316365	0.83975	0.69428	0.963459	1	2010	tags=44%, list=26%, signal=59%	-0.83975
YOSHIMURA_MAPK8_TARGETS_UP		486	0.178635	0.83966	0.975332	0.962969	1	1684	tags=22%, list=22%, signal=26%	-0.83966
MALONEY_RESPONSE_TO_17AAG_DN		51	0.24139	0.839647	0.772296	0.962305	1	2149	tags=35%, list=28%, signal=48%	-0.839647
KIM_GLIS2_TARGETS_UP		33	0.26358	0.839566	0.733607	0.961767	1	396	tags=12%, list=5%, signal=13%	-0.839566
BROWNE_HCMV_INFECTION_14HR_UP		73	0.226802	0.838482	0.794297	0.963451	1	1522	tags=26%, list=20%, signal=32%	-0.838482
WP_METAPATHWAY_BIOTRANSFORMATION_PHASE_I_AND_II		47	0.245647	0.838297	0.777555	0.963144	1	1820	tags=28%, list=23%, signal=36%	-0.838297
DITTMER_PTHLH_TARGETS_DN		42	0.249286	0.838268	0.745665	0.962523	1	2114	tags=40%, list=27%, signal=55%	-0.838268
REACTOME_SARS_COV_2_MODULATES_HOST_TRANSLATION_MACHINERY		44	0.251592	0.8379	0.753425	0.96261	1	987	tags=16%, list=13%, signal=18%	-0.8379
GRAHAM_CML_QUIESCENT_VS_NORMAL_QUIESCENT_DN		15	0.326312	0.83759	0.682879	0.962585	1	573	tags=13%, list=7%, signal=14%	-0.83759
RADMACHER_AML_PROGNOSIS		37	0.255853	0.836398	0.717694	0.964439	1	2235	tags=46%, list=29%, signal=64%	-0.836398
PARENT_MTOR_SIGNALING_DN		16	0.318015	0.836337	0.686654	0.96386	1	1729	tags=25%, list=22%, signal=32%	-0.836337
PID_TXA2PATHWAY		28	0.272684	0.835284	0.691715	0.965413	1	2033	tags=43%, list=26%, signal=58%	-0.835284
HAHTOLA_SEZARY_SYNDROM_UP		40	0.248535	0.835245	0.746535	0.964797	1	971	tags=15%, list=12%, signal=17%	-0.835245
GRAESSMANN_RESPONSE_TO_MC_AND_SERUM_DEPRIVATION_DN		42	0.25128	0.834981	0.723077	0.964688	1	2800	tags=48%, list=36%, signal=74%	-0.834981
REACTOME_G_ALPHA_Q_SIGNALLING_EVENTS		70	0.229922	0.834769	0.817491	0.964448	1	1751	tags=33%, list=22%, signal=42%	-0.834769
LEIN_PONS_MARKERS		41	0.259259	0.834633	0.771372	0.964095	1	636	tags=17%, list=8%, signal=18%	-0.834633
LEE_LIVER_CANCER_E2F1_DN		24	0.276118	0.833598	0.720322	0.965565	1	2786	tags=50%, list=36%, signal=78%	-0.833598
SEAVEY_EPITHELIOID_HEMANGIOENDOTHELIOMA		23	0.288822	0.833523	0.726899	0.965037	1	782	tags=17%, list=10%, signal=19%	-0.833523
HOFFMANN_LARGE_TO_SMALL_PRE_BII_LYMPHOCYTE_DN		25	0.278831	0.833066	0.737143	0.965298	1	1203	tags=16%, list=15%, signal=19%	-0.833066
REACTOME_RECRUITMENT_OF_MITOTIC_CENTROSOME_PROTEINS_AND_COMPLEXES		40	0.256119	0.832757	0.745098	0.965271	1	1860	tags=33%, list=24%, signal=42%	-0.832757
REACTOME_TRNA_PROCESSING		80	0.221889	0.832535	0.827935	0.965054	1	1014	tags=15%, list=13%, signal=17%	-0.832535
GARGALOVIC_RESPONSE_TO_OXIDIZED_PHOSPHOLIPIDS_TURQUOISE_UP		33	0.265575	0.832518	0.74477	0.9644	1	2538	tags=45%, list=33%, signal=67%	-0.832518
SERVITJA_LIVER_HNF1A_TARGETS_UP		44	0.248635	0.831796	0.753452	0.965234	1	1670	tags=25%, list=21%, signal=32%	-0.831796
BAELDE_DIABETIC_NEPHROPATHY_DN		253	0.188902	0.830142	0.922642	0.968038	1	1684	tags=23%, list=22%, signal=29%	-0.830142
PETROVA_ENDOTHELIUM_LYMPHATIC_VS_BLOOD_DN		77	0.221399	0.829376	0.797959	0.968971	1	1089	tags=19%, list=14%, signal=22%	-0.829376
REACTOME_APC_C_CDH1_MEDIATED_DEGRADATION_OF_CDC20_AND_OTHER_APC_C_CDH1_TARGETED_PROTEINS_IN_LATE_MITOSIS_EARLY_G1		54	0.236205	0.829032	0.804124	0.968999	1	1677	tags=26%, list=22%, signal=33%	-0.829032
LEE_LIVER_CANCER_E2F1_UP		26	0.275659	0.82876	0.746392	0.968845	1	284	tags=12%, list=4%, signal=12%	-0.82876
KAYO_CALORIE_RESTRICTION_MUSCLE_DN		50	0.241579	0.8287	0.76342	0.96829	1	1984	tags=26%, list=25%, signal=35%	-0.8287
ZHU_CMV_ALL_UP		55	0.233413	0.828062	0.80916	0.968931	1	1153	tags=20%, list=15%, signal=23%	-0.828062
WP_ETHANOL_EFFECTS_ON_HISTONE_MODIFICATIONS		20	0.292605	0.827452	0.705882	0.969498	1	2625	tags=55%, list=34%, signal=83%	-0.827452
REACTOME_IRE1ALPHA_ACTIVATES_CHAPERONES		30	0.266993	0.827394	0.726	0.968939	1	682	tags=13%, list=9%, signal=15%	-0.827394
WP_WNT_SIGNALING_PATHWAY_AND_PLURIPOTENCY		36	0.258324	0.827238	0.736	0.96857	1	2027	tags=42%, list=26%, signal=56%	-0.827238
LAIHO_COLORECTAL_CANCER_SERRATED_UP		73	0.221322	0.826988	0.806723	0.968374	1	1580	tags=27%, list=20%, signal=34%	-0.826988
BONOME_OVARIAN_CANCER_POOR_SURVIVAL_UP		24	0.285205	0.82696	0.735294	0.96775	1	769	tags=21%, list=10%, signal=23%	-0.82696
VANTVEER_BREAST_CANCER_ESR1_UP		77	0.224354	0.826592	0.806084	0.967827	1	1617	tags=23%, list=21%, signal=29%	-0.826592
PEDRIOLI_MIR31_TARGETS_DN		172	0.198434	0.826507	0.899048	0.96732	1	888	tags=13%, list=11%, signal=14%	-0.826507
ZHOU_TNF_SIGNALING_4HR		29	0.280161	0.825619	0.721774	0.968474	1	2016	tags=41%, list=26%, signal=56%	-0.825619
WP_SARSCOV2_MITOCHONDRIAL_CHRONIC_OXIDATIVE_STRESS_AND_ENDOTHELIAL_DYSFUNCTION		17	0.307119	0.825526	0.692308	0.967977	1	2016	tags=29%, list=26%, signal=40%	-0.825526
REACTOME_VOLTAGE_GATED_POTASSIUM_CHANNELS		18	0.305376	0.82486	0.715686	0.968669	1	750	tags=11%, list=10%, signal=12%	-0.82486
HONMA_DOCETAXEL_RESISTANCE		25	0.281446	0.824312	0.725681	0.96908	1	1071	tags=24%, list=14%, signal=28%	-0.824312
LEE_AGING_MUSCLE_DN		22	0.282262	0.82417	0.721116	0.968647	1	1558	tags=32%, list=20%, signal=40%	-0.82417
PID_EPO_PATHWAY		23	0.283389	0.824149	0.736634	0.968004	1	1122	tags=22%, list=14%, signal=25%	-0.824149
TURASHVILI_BREAST_DUCTAL_CARCINOMA_VS_LOBULAR_NORMAL_UP		34	0.25586	0.824016	0.727835	0.967616	1	919	tags=15%, list=12%, signal=17%	-0.824016
WP_HAIR_FOLLICLE_DEVELOPMENT_CYTODIFFERENTIATION_PART_3_OF_3		27	0.274515	0.823915	0.771863	0.967134	1	462	tags=11%, list=6%, signal=12%	-0.823915
RIZKI_TUMOR_INVASIVENESS_3D_DN		138	0.201975	0.82329	0.908397	0.967734	1	1577	tags=21%, list=20%, signal=26%	-0.82329
WP_PI3KAKTMTOR_SIGNALING_PATHWAY_AND_THERAPEUTIC_OPPORTUNITIES		21	0.287415	0.823034	0.723684	0.967557	1	1285	tags=29%, list=16%, signal=34%	-0.823034
BIOCARTA_ERAD_PATHWAY		15	0.312438	0.822801	0.703187	0.96733	1	1402	tags=33%, list=18%, signal=41%	-0.822801
KEGG_SMALL_CELL_LUNG_CANCER		45	0.24005	0.821823	0.791587	0.968583	1	1016	tags=16%, list=13%, signal=18%	-0.821823
SCHAEFFER_PROSTATE_DEVELOPMENT_48HR_UP		169	0.196651	0.821285	0.920319	0.968994	1	2047	tags=30%, list=26%, signal=40%	-0.821285
JECHLINGER_EPITHELIAL_TO_MESENCHYMAL_TRANSITION_UP		35	0.26144	0.821196	0.76494	0.968508	1	1673	tags=31%, list=21%, signal=40%	-0.821196
REACTOME_TP53_REGULATES_TRANSCRIPTION_OF_CELL_DEATH_GENES		17	0.304959	0.821132	0.730845	0.967967	1	1159	tags=35%, list=15%, signal=41%	-0.821132
PAPASPYRIDONOS_UNSTABLE_ATEROSCLEROTIC_PLAQUE_DN		23	0.285169	0.821053	0.724753	0.967459	1	998	tags=17%, list=13%, signal=20%	-0.821053
PETROVA_PROX1_TARGETS_DN		25	0.277159	0.820875	0.732143	0.967159	1	1841	tags=32%, list=24%, signal=42%	-0.820875
SESTO_RESPONSE_TO_UV_C8		42	0.242032	0.8208	0.763527	0.96663	1	1756	tags=29%, list=23%, signal=37%	-0.8208
PECE_MAMMARY_STEM_CELL_UP		81	0.217032	0.820559	0.831439	0.966403	1	2332	tags=37%, list=30%, signal=52%	-0.820559
GEORGES_CELL_CYCLE_MIR192_TARGETS		32	0.266542	0.820271	0.760479	0.966298	1	1713	tags=34%, list=22%, signal=44%	-0.820271
PEDERSEN_TARGETS_OF_611CTF_ISOFORM_OF_ERBB2		26	0.275767	0.819867	0.75969	0.96643	1	1306	tags=23%, list=17%, signal=28%	-0.819867
REACTOME_INTERLEUKIN_12_SIGNALING		27	0.270582	0.818687	0.732535	0.968073	1	794	tags=19%, list=10%, signal=21%	-0.818687
REACTOME_CARGO_TRAFFICKING_TO_THE_PERICILIARY_MEMBRANE		34	0.253676	0.818342	0.776147	0.968078	1	2391	tags=44%, list=31%, signal=63%	-0.818342
TAKEDA_TARGETS_OF_NUP98_HOXA9_FUSION_8D_DN		73	0.221248	0.818195	0.840954	0.967685	1	1246	tags=19%, list=16%, signal=23%	-0.818195
CHIBA_RESPONSE_TO_TSA		26	0.268471	0.818181	0.759328	0.967037	1	1745	tags=23%, list=22%, signal=30%	-0.818181
BILD_SRC_ONCOGENIC_SIGNATURE		31	0.263308	0.817198	0.766208	0.968309	1	1318	tags=26%, list=17%, signal=31%	-0.817198
CHYLA_CBFA2T3_TARGETS_DN		85	0.216189	0.816836	0.850099	0.968318	1	1896	tags=21%, list=24%, signal=28%	-0.816836
WP_2Q13_COPY_NUMBER_VARIATION_SYNDROME		20	0.28766	0.816344	0.707006	0.968631	1	2095	tags=40%, list=27%, signal=55%	-0.816344
REACTOME_HIV_TRANSCRIPTION_INITIATION		36	0.250687	0.816271	0.772455	0.968101	1	612	tags=14%, list=8%, signal=15%	-0.816271
REACTOME_NUCLEOTIDE_SALVAGE		15	0.314267	0.816266	0.725807	0.967439	1	1443	tags=40%, list=19%, signal=49%	-0.816266
ZHOU_INFLAMMATORY_RESPONSE_FIMA_DN		96	0.208266	0.816184	0.852941	0.966934	1	1923	tags=29%, list=25%, signal=38%	-0.816184
LINDGREN_BLADDER_CANCER_CLUSTER_3_DN		114	0.203781	0.81562	0.883946	0.967412	1	1393	tags=19%, list=18%, signal=23%	-0.81562
REACTOME_COLLAGEN_BIOSYNTHESIS_AND_MODIFYING_ENZYMES		23	0.280036	0.81554	0.765748	0.966903	1	1988	tags=39%, list=25%, signal=52%	-0.81554
ZHENG_FOXP3_TARGETS_IN_THYMUS_UP		99	0.210612	0.815028	0.856867	0.9672	1	1546	tags=23%, list=20%, signal=29%	-0.815028
WP_PROTEASOME_DEGRADATION		45	0.248022	0.814996	0.785582	0.966604	1	1677	tags=31%, list=22%, signal=39%	-0.814996
LI_INDUCED_T_TO_NATURAL_KILLER_DN		62	0.227483	0.814992	0.829787	0.965946	1	1892	tags=32%, list=24%, signal=42%	-0.814992
FARDIN_HYPOXIA_11		16	0.312789	0.814898	0.729941	0.965455	1	1570	tags=44%, list=20%, signal=55%	-0.814898
AMIT_EGF_RESPONSE_480_HELA		85	0.212086	0.813462	0.857732	0.96754	1	2020	tags=33%, list=26%, signal=44%	-0.813462
CHEBOTAEV_GR_TARGETS_DN		55	0.228951	0.811468	0.834308	0.970593	1	1805	tags=29%, list=23%, signal=38%	-0.811468
REACTOME_AUF1_HNRNP_D0_BINDS_AND_DESTABILIZES_MRNA		44	0.242876	0.811193	0.800774	0.97041	1	1677	tags=30%, list=22%, signal=37%	-0.811193
OHGUCHI_LIVER_HNF4A_TARGETS_UP		16	0.306019	0.810973	0.733059	0.970148	1	2051	tags=25%, list=26%, signal=34%	-0.810973
REACTOME_MUSCLE_CONTRACTION		70	0.22091	0.81059	0.850662	0.970205	1	1062	tags=14%, list=14%, signal=16%	-0.81059
PID_SYNDECAN_1_PATHWAY		18	0.297065	0.809109	0.724753	0.972277	1	1487	tags=33%, list=19%, signal=41%	-0.809109
WP_P38_MAPK_SIGNALING_PATHWAY		21	0.282269	0.808845	0.754902	0.972091	1	1167	tags=33%, list=15%, signal=39%	-0.808845
REACTOME_PKMTS_METHYLATE_HISTONE_LYSINES		27	0.270336	0.808604	0.781585	0.971852	1	1	tags=4%, list=0%, signal=4%	-0.808604
REACTOME_APOPTOSIS		107	0.205587	0.80846	0.876448	0.971464	1	1966	tags=30%, list=25%, signal=39%	-0.80846
SHEPARD_CRASH_AND_BURN_MUTANT_UP		99	0.21186	0.808427	0.870906	0.970864	1	1510	tags=25%, list=19%, signal=31%	-0.808427
CERVERA_SDHB_TARGETS_1_UP		38	0.243549	0.807893	0.79802	0.971169	1	1533	tags=21%, list=20%, signal=26%	-0.807893
MODY_HIPPOCAMPUS_NEONATAL		23	0.273368	0.807539	0.756809	0.971151	1	1240	tags=26%, list=16%, signal=31%	-0.807539
VECCHI_GASTRIC_CANCER_ADVANCED_VS_EARLY_DN		46	0.236755	0.80733	0.806324	0.970894	1	1018	tags=15%, list=13%, signal=17%	-0.80733
TONKS_TARGETS_OF_RUNX1_RUNX1T1_FUSION_MONOCYTE_DN		19	0.288655	0.806779	0.74	0.97126	1	2033	tags=37%, list=26%, signal=50%	-0.806779
NOUZOVA_METHYLATED_IN_APL		29	0.25867	0.805779	0.771654	0.972425	1	1495	tags=28%, list=19%, signal=34%	-0.805779
LU_AGING_BRAIN_DN		103	0.205501	0.805532	0.864919	0.972235	1	2033	tags=31%, list=26%, signal=41%	-0.805532
BIOCARTA_P38MAPK_PATHWAY		22	0.28	0.804599	0.751491	0.973249	1	1167	tags=32%, list=15%, signal=37%	-0.804599
MORI_SMALL_PRE_BII_LYMPHOCYTE_DN		37	0.251712	0.803789	0.782101	0.974056	1	1285	tags=22%, list=16%, signal=26%	-0.803789
GRABARCZYK_BCL11B_TARGETS_UP		34	0.248886	0.803414	0.800403	0.974088	1	1046	tags=21%, list=13%, signal=24%	-0.803414
REACTOME_MITOTIC_SPINDLE_CHECKPOINT		56	0.228241	0.803395	0.858491	0.973466	1	1471	tags=21%, list=19%, signal=26%	-0.803395
PID_CXCR4_PATHWAY		60	0.222193	0.802929	0.835366	0.973676	1	1948	tags=30%, list=25%, signal=40%	-0.802929
REACTOME_REGULATION_OF_RUNX3_EXPRESSION_AND_ACTIVITY		42	0.23762	0.802865	0.813725	0.973136	1	1677	tags=29%, list=22%, signal=36%	-0.802865
PID_ARF6_PATHWAY		18	0.294282	0.801542	0.750929	0.974749	1	2190	tags=44%, list=28%, signal=62%	-0.801542
PID_IL4_2PATHWAY		27	0.26812	0.799315	0.779762	0.977991	1	2280	tags=41%, list=29%, signal=57%	-0.799315
WP_ENDOMETRIAL_CANCER		26	0.270933	0.79927	0.756917	0.977414	1	1184	tags=19%, list=15%, signal=23%	-0.79927
WP_HEAD_AND_NECK_SQUAMOUS_CELL_CARCINOMA		39	0.24323	0.79903	0.809981	0.977164	1	2837	tags=54%, list=36%, signal=84%	-0.79903
MONNIER_POSTRADIATION_TUMOR_ESCAPE_DN		170	0.18955	0.798435	0.938849	0.977541	1	1285	tags=17%, list=16%, signal=20%	-0.798435
PID_FGF_PATHWAY		26	0.269943	0.798298	0.810379	0.977124	1	2190	tags=35%, list=28%, signal=48%	-0.798298
REACTOME_EGFR_DOWNREGULATION		16	0.293675	0.797965	0.758	0.977065	1	2245	tags=31%, list=29%, signal=44%	-0.797965
REACTOME_TGF_BETA_RECEPTOR_SIGNALING_ACTIVATES_SMADS		21	0.277958	0.797668	0.789883	0.976911	1	2134	tags=33%, list=27%, signal=46%	-0.797668
RIZKI_TUMOR_INVASIVENESS_3D_UP		96	0.208645	0.796997	0.888278	0.977394	1	1537	tags=20%, list=20%, signal=24%	-0.796997
KEGG_LONG_TERM_DEPRESSION		27	0.26265	0.796621	0.76998	0.977396	1	2053	tags=33%, list=26%, signal=45%	-0.796621
WANG_BARRETTS_ESOPHAGUS_AND_ESOPHAGUS_CANCER_DN		17	0.293265	0.796481	0.773109	0.976977	1	2182	tags=47%, list=28%, signal=65%	-0.796481
WENDT_COHESIN_TARGETS_UP		24	0.268416	0.796239	0.7749	0.976727	1	726	tags=17%, list=9%, signal=18%	-0.796239
SMIRNOV_RESPONSE_TO_IR_6HR_UP		62	0.222554	0.796027	0.850895	0.976418	1	1769	tags=26%, list=23%, signal=33%	-0.796027
TOOKER_GEMCITABINE_RESISTANCE_UP		43	0.235088	0.795686	0.809615	0.976323	1	1696	tags=33%, list=22%, signal=41%	-0.795686
BOYLAN_MULTIPLE_MYELOMA_PCA1_UP		39	0.245235	0.79501	0.803571	0.97677	1	1246	tags=23%, list=16%, signal=27%	-0.79501
PID_ERBB1_INTERNALIZATION_PATHWAY		29	0.259969	0.79482	0.794179	0.976436	1	2324	tags=38%, list=30%, signal=54%	-0.79482
KEGG_PROTEIN_EXPORT		17	0.292338	0.792754	0.75498	0.979208	1	1438	tags=24%, list=18%, signal=29%	-0.792754
WP_MALIGNANT_PLEURAL_MESOTHELIOMA		180	0.188806	0.792092	0.946	0.979664	1	1478	tags=21%, list=19%, signal=25%	-0.792092
YAO_TEMPORAL_RESPONSE_TO_PROGESTERONE_CLUSTER_9		31	0.251697	0.791342	0.797753	0.98027	1	456	tags=13%, list=6%, signal=14%	-0.791342
PID_INSULIN_PATHWAY		33	0.250488	0.791244	0.803119	0.979769	1	2379	tags=39%, list=31%, signal=56%	-0.791244
STOSSI_RESPONSE_TO_ESTRADIOL		16	0.294401	0.790933	0.77963	0.979613	1	1840	tags=38%, list=24%, signal=49%	-0.790933
REACTOME_TRANSPORT_TO_THE_GOLGI_AND_SUBSEQUENT_MODIFICATION		104	0.201975	0.79067	0.885214	0.979405	1	1164	tags=13%, list=15%, signal=16%	-0.79067
WP_SMALL_CELL_LUNG_CANCER		46	0.233359	0.79024	0.830645	0.979438	1	1314	tags=20%, list=17%, signal=23%	-0.79024
OUILLETTE_CLL_13Q14_DELETION_UP		38	0.240702	0.789883	0.794872	0.979364	1	1243	tags=21%, list=16%, signal=25%	-0.789883
VALK_AML_CLUSTER_16		16	0.295578	0.789617	0.756539	0.979143	1	1476	tags=31%, list=19%, signal=38%	-0.789617
JOHANSSON_GLIOMAGENESIS_BY_PDGFB_UP		31	0.256614	0.789489	0.820116	0.978702	1	1571	tags=32%, list=20%, signal=40%	-0.789489
DARWICHE_PAPILLOMA_RISK_HIGH_DN		86	0.203694	0.789259	0.896686	0.97844	1	1921	tags=30%, list=25%, signal=40%	-0.789259
SANA_RESPONSE_TO_IFNG_DN		53	0.229482	0.789148	0.841418	0.977974	1	1678	tags=30%, list=22%, signal=38%	-0.789148
IGARASHI_ATF4_TARGETS_DN		51	0.22732	0.788956	0.859316	0.977638	1	1624	tags=24%, list=21%, signal=30%	-0.788956
REACTOME_RRNA_MODIFICATION_IN_THE_NUCLEUS_AND_CYTOSOL		49	0.227902	0.788506	0.851504	0.977707	1	1846	tags=33%, list=24%, signal=43%	-0.788506
REACTOME_CD28_CO_STIMULATION		16	0.296938	0.788414	0.772549	0.977199	1	2185	tags=38%, list=28%, signal=52%	-0.788414
WP_CELL_CYCLE		40	0.23558	0.788343	0.843874	0.976682	1	1395	tags=23%, list=18%, signal=27%	-0.788343
LIAN_LIPA_TARGETS_6M		18	0.294331	0.788299	0.797217	0.97611	1	4	tags=6%, list=0%, signal=6%	-0.788299
KYNG_ENVIRONMENTAL_STRESS_RESPONSE_NOT_BY_GAMMA_IN_OLD		16	0.29976	0.787306	0.759152	0.977039	1	2082	tags=38%, list=27%, signal=51%	-0.787306
KOYAMA_SEMA3B_TARGETS_DN		156	0.191278	0.787184	0.938086	0.976584	1	1915	tags=29%, list=25%, signal=37%	-0.787184
MALONEY_RESPONSE_TO_17AAG_UP		22	0.274372	0.787091	0.761252	0.976093	1	2143	tags=41%, list=27%, signal=56%	-0.787091
REACTOME_DEGRADATION_OF_THE_EXTRACELLULAR_MATRIX		50	0.229628	0.786947	0.866944	0.975677	1	903	tags=18%, list=12%, signal=20%	-0.786947
KYNG_DNA_DAMAGE_BY_4NQO_OR_UV		26	0.266826	0.786912	0.804348	0.975084	1	1018	tags=23%, list=13%, signal=26%	-0.786912
QI_HYPOXIA_TARGETS_OF_HIF1A_AND_FOXA2		21	0.283116	0.786539	0.815416	0.975013	1	1499	tags=38%, list=19%, signal=47%	-0.786539
MANNE_COVID19_ICU_VS_HEALTHY_DONOR_PLATELETS_UP		42	0.238018	0.786415	0.844231	0.974566	1	1673	tags=19%, list=21%, signal=24%	-0.786415
VECCHI_GASTRIC_CANCER_EARLY_UP		182	0.186861	0.786366	0.963671	0.973993	1	1511	tags=20%, list=19%, signal=24%	-0.786366
REACTOME_CITRIC_ACID_CYCLE_TCA_CYCLE		19	0.287629	0.785844	0.777328	0.974163	1	2437	tags=37%, list=31%, signal=53%	-0.785844
LEE_LIVER_CANCER_DENA_DN		28	0.256057	0.785441	0.809709	0.974156	1	1515	tags=21%, list=19%, signal=26%	-0.785441
MORI_MATURE_B_LYMPHOCYTE_UP		37	0.24204	0.785287	0.836327	0.973741	1	1497	tags=22%, list=19%, signal=27%	-0.785287
WUNDER_INFLAMMATORY_RESPONSE_AND_CHOLESTEROL_UP		21	0.27397	0.785229	0.793456	0.973187	1	11	tags=5%, list=0%, signal=5%	-0.785229
REACTOME_TRANSCRIPTIONAL_REGULATION_BY_THE_AP_2_TFAP2_FAMILY_OF_TRANSCRIPTION_FACTORS		17	0.294878	0.784822	0.779661	0.973181	1	1904	tags=41%, list=24%, signal=54%	-0.784822
REACTOME_GENE_AND_PROTEIN_EXPRESSION_BY_JAK_STAT_SIGNALING_AFTER_INTERLEUKIN_12_STIMULATION		23	0.271469	0.784597	0.78389	0.972878	1	794	tags=17%, list=10%, signal=19%	-0.784597
ASGHARZADEH_NEUROBLASTOMA_POOR_SURVIVAL_DN		20	0.276441	0.784389	0.786561	0.972551	1	1062	tags=20%, list=14%, signal=23%	-0.784389
REACTOME_NERVOUS_SYSTEM_DEVELOPMENT		358	0.171592	0.78434	1	0.971997	1	1579	tags=19%, list=20%, signal=22%	-0.78434
PID_HIF1_TFPATHWAY		30	0.254833	0.783675	0.805447	0.972399	1	1670	tags=33%, list=21%, signal=42%	-0.783675
KEGG_GAP_JUNCTION		38	0.242202	0.78227	0.838095	0.973881	1	2053	tags=32%, list=26%, signal=43%	-0.78227
PID_GMCSF_PATHWAY		17	0.293755	0.78202	0.783681	0.973618	1	1016	tags=18%, list=13%, signal=20%	-0.78202
BREDEMEYER_RAG_SIGNALING_NOT_VIA_ATM_UP		23	0.269174	0.781804	0.813725	0.973318	1	873	tags=17%, list=11%, signal=20%	-0.781804
WP_22Q112_COPY_NUMBER_VARIATION_SYNDROME		50	0.223125	0.780381	0.848197	0.974834	1	1515	tags=24%, list=19%, signal=30%	-0.780381
REACTOME_RUNX1_REGULATES_TRANSCRIPTION_OF_GENES_INVOLVED_IN_DIFFERENTIATION_OF_HSCS		49	0.229632	0.779665	0.865462	0.975289	1	1677	tags=27%, list=22%, signal=34%	-0.779665
KEGG_ADHERENS_JUNCTION		42	0.234466	0.779353	0.842829	0.975131	1	1954	tags=24%, list=25%, signal=32%	-0.779353
REACTOME_SIGNALING_BY_EGFR		31	0.249521	0.778376	0.838843	0.975968	1	2245	tags=32%, list=29%, signal=45%	-0.778376
FIGUEROA_AML_METHYLATION_CLUSTER_2_UP		21	0.272767	0.777037	0.774327	0.977347	1	2144	tags=48%, list=27%, signal=65%	-0.777037
IVANOVA_HEMATOPOIESIS_INTERMEDIATE_PROGENITOR		91	0.202444	0.777008	0.912451	0.976744	1	1003	tags=13%, list=13%, signal=15%	-0.777008
NIKOLSKY_BREAST_CANCER_16Q24_AMPLICON		23	0.26521	0.776351	0.794872	0.977069	1	1397	tags=22%, list=18%, signal=26%	-0.776351
REACTOME_G_PROTEIN_BETA_GAMMA_SIGNALLING		18	0.285426	0.776037	0.789264	0.976887	1	2185	tags=50%, list=28%, signal=69%	-0.776037
WP_FATTY_ACID_BIOSYNTHESIS		15	0.297696	0.775621	0.762172	0.976868	1	439	tags=13%, list=6%, signal=14%	-0.775621
REACTOME_DISASSEMBLY_OF_THE_DESTRUCTION_COMPLEX_AND_RECRUITMENT_OF_AXIN_TO_THE_MEMBRANE		17	0.286836	0.775317	0.805383	0.976668	1	1954	tags=41%, list=25%, signal=55%	-0.775317
EHLERS_ANEUPLOIDY_UP		21	0.273626	0.774788	0.816162	0.976814	1	1018	tags=19%, list=13%, signal=22%	-0.774788
HU_GENOTOXIC_DAMAGE_4HR		15	0.302706	0.773656	0.776876	0.977797	1	1443	tags=33%, list=19%, signal=41%	-0.773656
ZHAN_MULTIPLE_MYELOMA_SUBGROUPS		19	0.284371	0.771096	0.807767	0.980762	1	1430	tags=26%, list=18%, signal=32%	-0.771096
RICKMAN_TUMOR_DIFFERENTIATED_WELL_VS_MODERATELY_DN		35	0.242657	0.770879	0.853107	0.980421	1	1813	tags=31%, list=23%, signal=41%	-0.770879
WP_TYPE_I_COLLAGEN_SYNTHESIS_IN_THE_CONTEXT_OF_OSTEOGENESIS_IMPERFECTA		16	0.29245	0.770864	0.788187	0.979814	1	1988	tags=44%, list=25%, signal=59%	-0.770864
REACTOME_IRS_MEDIATED_SIGNALLING		18	0.281259	0.769917	0.773333	0.980502	1	2185	tags=33%, list=28%, signal=46%	-0.769917
RICKMAN_TUMOR_DIFFERENTIATED_MODERATELY_VS_POORLY_UP		58	0.215957	0.769482	0.880325	0.980479	1	2420	tags=36%, list=31%, signal=52%	-0.769482
WP_NRP1TRIGGERED_SIGNALING_PATHWAYS_IN_PANCREATIC_CANCER		23	0.267914	0.769409	0.808967	0.979936	1	2190	tags=30%, list=28%, signal=42%	-0.769409
CROMER_TUMORIGENESIS_DN		15	0.292565	0.769304	0.782258	0.97944	1	2658	tags=60%, list=34%, signal=91%	-0.769304
KEGG_ANTIGEN_PROCESSING_AND_PRESENTATION		16	0.285286	0.768912	0.767967	0.979351	1	1407	tags=25%, list=18%, signal=30%	-0.768912
WP_HIPPO_SIGNALING_REGULATION_PATHWAYS		44	0.231836	0.768142	0.87169	0.979776	1	2443	tags=41%, list=31%, signal=59%	-0.768142
NAKAMURA_METASTASIS		26	0.259055	0.767065	0.833667	0.980612	1	1805	tags=31%, list=23%, signal=40%	-0.767065
REACTOME_SIGNALING_BY_TYPE_1_INSULIN_LIKE_GROWTH_FACTOR_1_RECEPTOR_IGF1R		19	0.276585	0.766763	0.801636	0.980409	1	1817	tags=26%, list=23%, signal=34%	-0.766763
MULLIGHAN_MLL_SIGNATURE_2_DN		135	0.187206	0.766692	0.955801	0.979872	1	1885	tags=27%, list=24%, signal=35%	-0.766692
REACTOME_FLT3_SIGNALING_IN_DISEASE		15	0.290259	0.765324	0.785441	0.981119	1	1890	tags=33%, list=24%, signal=44%	-0.765324
REACTOME_CARDIAC_CONDUCTION		41	0.230903	0.765161	0.85214	0.9807	1	1062	tags=17%, list=14%, signal=20%	-0.765161
HUMMERICH_SKIN_CANCER_PROGRESSION_UP		36	0.234369	0.765006	0.825919	0.980257	1	994	tags=17%, list=13%, signal=19%	-0.765006
YAGI_AML_WITH_11Q23_REARRANGED		173	0.182814	0.764668	0.977901	0.980053	1	1616	tags=21%, list=21%, signal=26%	-0.764668
RASHI_RESPONSE_TO_IONIZING_RADIATION_4		24	0.260964	0.763511	0.835249	0.980982	1	1538	tags=29%, list=20%, signal=36%	-0.763511
REACTOME_ACTIVATION_OF_NMDA_RECEPTORS_AND_POSTSYNAPTIC_EVENTS		41	0.23061	0.763236	0.868787	0.980731	1	1082	tags=17%, list=14%, signal=20%	-0.763236
ACEVEDO_LIVER_CANCER_WITH_H3K9ME3_DN		29	0.247827	0.763143	0.854093	0.980235	1	1411	tags=24%, list=18%, signal=29%	-0.763143
CAFFAREL_RESPONSE_TO_THC_UP		19	0.271654	0.76279	0.823875	0.980058	1	2594	tags=47%, list=33%, signal=71%	-0.76279
REACTOME_NEGATIVE_REGULATION_OF_MET_ACTIVITY		15	0.28533	0.759875	0.814532	0.983299	1	2190	tags=40%, list=28%, signal=56%	-0.759875
KEGG_ENDOMETRIAL_CANCER		23	0.25606	0.75873	0.820116	0.984173	1	2185	tags=30%, list=28%, signal=42%	-0.75873
WP_EUKARYOTIC_TRANSCRIPTION_INITIATION		34	0.242477	0.757393	0.842829	0.985237	1	1184	tags=21%, list=15%, signal=24%	-0.757393
RAGHAVACHARI_PLATELET_SPECIFIC_GENES		37	0.234683	0.757282	0.873294	0.984735	1	1116	tags=19%, list=14%, signal=22%	-0.757282
LUI_THYROID_CANCER_CLUSTER_3		19	0.268077	0.757014	0.798434	0.984474	1	962	tags=16%, list=12%, signal=18%	-0.757014
REACTOME_TRANSCRIPTION_COUPLED_NUCLEOTIDE_EXCISION_REPAIR_TC_NER		58	0.214474	0.756912	0.893709	0.983988	1	1221	tags=19%, list=16%, signal=22%	-0.756912
REACTOME_TRANSCRIPTIONAL_REGULATION_BY_RUNX2		66	0.208002	0.756364	0.908911	0.984041	1	1677	tags=24%, list=22%, signal=31%	-0.756364
KEGG_NATURAL_KILLER_CELL_MEDIATED_CYTOTOXICITY		36	0.238868	0.756242	0.845283	0.98358	1	1137	tags=19%, list=15%, signal=23%	-0.756242
KEGG_SELENOAMINO_ACID_METABOLISM		17	0.278822	0.755716	0.818702	0.983639	1	773	tags=12%, list=10%, signal=13%	-0.755716
KEGG_B_CELL_RECEPTOR_SIGNALING_PATHWAY		36	0.234087	0.755664	0.849903	0.983075	1	1016	tags=17%, list=13%, signal=19%	-0.755664
SMID_BREAST_CANCER_ERBB2_UP		59	0.209956	0.755502	0.923379	0.982659	1	2062	tags=27%, list=26%, signal=37%	-0.755502
GENTILE_UV_RESPONSE_CLUSTER_D5		19	0.270716	0.755209	0.820866	0.982405	1	979	tags=16%, list=13%, signal=18%	-0.755209
WAKABAYASHI_ADIPOGENESIS_PPARG_BOUND_36HR		19	0.273101	0.753766	0.816162	0.983609	1	1348	tags=21%, list=17%, signal=25%	-0.753766
CHESLER_BRAIN_QTL_CIS		49	0.223191	0.753369	0.894737	0.983457	1	949	tags=16%, list=12%, signal=18%	-0.753369
REACTOME_REGULATION_OF_TP53_ACTIVITY		72	0.204837	0.75294	0.939394	0.983372	1	2306	tags=38%, list=30%, signal=53%	-0.75294
FOROUTAN_TGFB_EMT_DN		40	0.227154	0.751927	0.886228	0.983993	1	1303	tags=20%, list=17%, signal=24%	-0.751927
MIKKELSEN_MEF_ICP_WITH_H3K4ME3_AND_H3K27ME3		18	0.271689	0.751805	0.84803	0.983522	1	2519	tags=50%, list=32%, signal=74%	-0.751805
WP_BURN_WOUND_HEALING		33	0.238147	0.7514	0.864865	0.983379	1	890	tags=18%, list=11%, signal=20%	-0.7514
WP_DISRUPTION_OF_POSTSYNAPTIC_SIGNALING_BY_CNV		18	0.27561	0.751301	0.792636	0.982877	1	70	tags=6%, list=1%, signal=6%	-0.751301
BIOCARTA_MTOR_PATHWAY		16	0.294314	0.750493	0.816602	0.98324	1	2280	tags=50%, list=29%, signal=71%	-0.750493
HOELZEL_NF1_TARGETS_DN		50	0.218289	0.750424	0.909615	0.982703	1	886	tags=12%, list=11%, signal=13%	-0.750424
COLIN_PILOCYTIC_ASTROCYTOMA_VS_GLIOBLASTOMA_UP		24	0.252409	0.749693	0.845703	0.982959	1	1757	tags=21%, list=23%, signal=27%	-0.749693
REACTOME_SENESCENCE_ASSOCIATED_SECRETORY_PHENOTYPE_SASP		23	0.256135	0.749237	0.824561	0.982874	1	28	tags=4%, list=0%, signal=4%	-0.749237
GERHOLD_ADIPOGENESIS_UP		27	0.246567	0.749198	0.855649	0.982302	1	1019	tags=19%, list=13%, signal=21%	-0.749198
REACTOME_INSULIN_RECEPTOR_SIGNALLING_CASCADE		21	0.261115	0.74908	0.836653	0.981824	1	3145	tags=57%, list=40%, signal=95%	-0.74908
MCBRYAN_PUBERTAL_BREAST_6_7WK_DN		29	0.24484	0.748958	0.842942	0.981352	1	1193	tags=21%, list=15%, signal=24%	-0.748958
REACTOME_GLOBAL_GENOME_NUCLEOTIDE_EXCISION_REPAIR_GG_NER		53	0.217779	0.748941	0.918095	0.980755	1	1815	tags=30%, list=23%, signal=39%	-0.748941
WESTON_VEGFA_TARGETS		37	0.233586	0.748289	0.872428	0.980954	1	2303	tags=43%, list=30%, signal=61%	-0.748289
HEIDENBLAD_AMPLICON_12P11_12_UP		21	0.264006	0.747965	0.847423	0.980714	1	1267	tags=29%, list=16%, signal=34%	-0.747965
YAO_TEMPORAL_RESPONSE_TO_PROGESTERONE_CLUSTER_2		22	0.261651	0.747885	0.840868	0.980192	1	372	tags=9%, list=5%, signal=10%	-0.747885
KOHOUTEK_CCNT1_TARGETS		29	0.24419	0.74749	0.857143	0.980033	1	2308	tags=48%, list=30%, signal=68%	-0.74749
HELLEBREKERS_SILENCED_DURING_TUMOR_ANGIOGENESIS		37	0.232672	0.746969	0.869654	0.980065	1	2331	tags=32%, list=30%, signal=46%	-0.746969
REACTOME_PYRUVATE_METABOLISM_AND_CITRIC_ACID_TCA_CYCLE		42	0.218364	0.74681	0.897087	0.97963	1	2511	tags=36%, list=32%, signal=52%	-0.74681
WHITEHURST_PACLITAXEL_SENSITIVITY		19	0.267052	0.746055	0.833689	0.979862	1	1820	tags=37%, list=23%, signal=48%	-0.746055
REACTOME_STIMULI_SENSING_CHANNELS		40	0.227534	0.744804	0.877432	0.980702	1	1959	tags=30%, list=25%, signal=40%	-0.744804
SMIRNOV_RESPONSE_TO_IR_2HR_DN		15	0.283685	0.743836	0.816367	0.98124	1	2139	tags=47%, list=27%, signal=64%	-0.743836
APPIERTO_RESPONSE_TO_FENRETINIDE_DN		35	0.233907	0.743649	0.877289	0.980845	1	1556	tags=23%, list=20%, signal=28%	-0.743649
REACTOME_INTEGRATION_OF_ENERGY_METABOLISM		58	0.21154	0.743103	0.922449	0.980858	1	1590	tags=24%, list=20%, signal=30%	-0.743103
REACTOME_CELL_CELL_COMMUNICATION		66	0.204113	0.741224	0.912779	0.982415	1	1954	tags=23%, list=25%, signal=30%	-0.741224
LEE_CALORIE_RESTRICTION_NEOCORTEX_DN		36	0.22515	0.74114	0.903922	0.981898	1	1777	tags=28%, list=23%, signal=36%	-0.74114
KEGG_CELL_CYCLE		43	0.222633	0.741038	0.892157	0.981401	1	1448	tags=23%, list=19%, signal=28%	-0.741038
LEE_AGING_NEOCORTEX_UP		43	0.223628	0.740444	0.897287	0.981464	1	1954	tags=30%, list=25%, signal=40%	-0.740444
URS_ADIPOCYTE_DIFFERENTIATION_DN		15	0.282554	0.739569	0.833645	0.981826	1	2096	tags=40%, list=27%, signal=55%	-0.739569
MIKKELSEN_ES_HCP_WITH_H3_UNMETHYLATED		18	0.270332	0.738272	0.822086	0.98263	1	2402	tags=50%, list=31%, signal=72%	-0.738272
PID_CASPASE_PATHWAY		31	0.235135	0.738108	0.868979	0.982198	1	1026	tags=16%, list=13%, signal=18%	-0.738108
WP_B_CELL_RECEPTOR_SIGNALING_PATHWAY		52	0.212334	0.738007	0.907895	0.981694	1	1122	tags=17%, list=14%, signal=20%	-0.738007
KEGG_OXIDATIVE_PHOSPHORYLATION		74	0.197833	0.7373	0.948077	0.981871	1	839	tags=11%, list=11%, signal=12%	-0.7373
BLANCO_MELO_BETA_INTERFERON_TREATED_BRONCHIAL_EPITHELIAL_CELLS_DN		46	0.216402	0.736636	0.923077	0.981978	1	1417	tags=20%, list=18%, signal=24%	-0.736636
HOOI_ST7_TARGETS_UP		35	0.228769	0.735898	0.893145	0.982152	1	1819	tags=29%, list=23%, signal=37%	-0.735898
DARWICHE_SQUAMOUS_CELL_CARCINOMA_DN		85	0.192514	0.735779	0.952941	0.981664	1	2054	tags=31%, list=26%, signal=41%	-0.735779
HECKER_IFNB1_TARGETS		27	0.247139	0.734957	0.867327	0.981945	1	1105	tags=15%, list=14%, signal=17%	-0.734957
KAMMINGA_SENESCENCE		23	0.252366	0.734611	0.862	0.981731	1	1700	tags=26%, list=22%, signal=33%	-0.734611
PID_CERAMIDE_PATHWAY		27	0.239487	0.734357	0.874263	0.981425	1	2016	tags=37%, list=26%, signal=50%	-0.734357
ZHU_CMV_24_HR_DN		36	0.2238	0.733494	0.896175	0.981796	1	1920	tags=31%, list=25%, signal=40%	-0.733494
REACTOME_CLASS_B_2_SECRETIN_FAMILY_RECEPTORS		21	0.261533	0.732026	0.834646	0.982755	1	1590	tags=33%, list=20%, signal=42%	-0.732026
KEGG_TYPE_II_DIABETES_MELLITUS		23	0.253522	0.73196	0.873047	0.982209	1	1817	tags=26%, list=23%, signal=34%	-0.73196
REACTOME_B_WICH_COMPLEX_POSITIVELY_REGULATES_RRNA_EXPRESSION		17	0.279685	0.730264	0.857977	0.983416	1	2544	tags=47%, list=33%, signal=70%	-0.730264
PID_RHOA_REG_PATHWAY		30	0.237662	0.729679	0.89505	0.983408	1	676	tags=13%, list=9%, signal=15%	-0.729679
REACTOME_FCGAMMA_RECEPTOR_FCGR_DEPENDENT_PHAGOCYTOSIS		58	0.204733	0.729355	0.947896	0.98312	1	1896	tags=28%, list=24%, signal=36%	-0.729355
PID_MTOR_4PATHWAY		44	0.217435	0.728503	0.9375	0.983394	1	1817	tags=32%, list=23%, signal=41%	-0.728503
NIKOLSKY_BREAST_CANCER_16P13_AMPLICON		43	0.216658	0.728388	0.913793	0.982892	1	1222	tags=16%, list=16%, signal=19%	-0.728388
KAYO_AGING_MUSCLE_DN		73	0.19536	0.727922	0.947876	0.982786	1	1458	tags=22%, list=19%, signal=27%	-0.727922
REACTOME_ASYMMETRIC_LOCALIZATION_OF_PCP_PROTEINS		47	0.215016	0.727862	0.937008	0.982234	1	1677	tags=26%, list=22%, signal=32%	-0.727862
WIERENGA_PML_INTERACTOME		30	0.232566	0.727529	0.888889	0.981947	1	1822	tags=33%, list=23%, signal=43%	-0.727529
REACTOME_TRANSCRIPTIONAL_REGULATION_BY_VENTX		20	0.261636	0.727184	0.853119	0.981699	1	28	tags=5%, list=0%, signal=5%	-0.727184
LEE_LIVER_CANCER_MYC_E2F1_UP		21	0.254589	0.726469	0.86148	0.981832	1	1885	tags=38%, list=24%, signal=50%	-0.726469
REACTOME_ESR_MEDIATED_SIGNALING		87	0.188457	0.725848	0.964497	0.981864	1	2185	tags=34%, list=28%, signal=47%	-0.725848
HAMAI_APOPTOSIS_VIA_TRAIL_DN		80	0.192574	0.723375	0.975807	0.983705	1	2331	tags=38%, list=30%, signal=53%	-0.723375
NIKOLSKY_MUTATED_AND_AMPLIFIED_IN_BREAST_CANCER		53	0.205075	0.723155	0.946058	0.983292	1	1724	tags=23%, list=22%, signal=29%	-0.723155
REACTOME_GPER1_SIGNALING		25	0.244714	0.722872	0.870445	0.982947	1	2033	tags=36%, list=26%, signal=49%	-0.722872
REACTOME_SIGNALING_BY_FGFR		44	0.212427	0.722544	0.938462	0.982665	1	2095	tags=30%, list=27%, signal=40%	-0.722544
FIGUEROA_AML_METHYLATION_CLUSTER_6_UP		64	0.202772	0.721207	0.945489	0.983301	1	2231	tags=36%, list=29%, signal=50%	-0.721207
REACTOME_G_ALPHA_S_SIGNALLING_EVENTS		46	0.213665	0.720311	0.924125	0.983583	1	1590	tags=24%, list=20%, signal=30%	-0.720311
KEGG_COLORECTAL_CANCER		27	0.240038	0.719845	0.903285	0.983465	1	1954	tags=30%, list=25%, signal=39%	-0.719845
VANHARANTA_UTERINE_FIBROID_WITH_7Q_DELETION_UP		46	0.212385	0.719067	0.945455	0.983621	1	462	tags=9%, list=6%, signal=9%	-0.719067
WP_REGUCALCIN_IN_PROXIMAL_TUBULE_EPITHELIAL_KIDNEY_CELLS		17	0.265517	0.718545	0.872587	0.983502	1	1843	tags=35%, list=24%, signal=46%	-0.718545
WP_NUCLEOTIDE_EXCISION_REPAIR		27	0.239189	0.71782	0.876569	0.983589	1	1133	tags=19%, list=15%, signal=22%	-0.71782
KEGG_NUCLEOTIDE_EXCISION_REPAIR		27	0.239189	0.717082	0.903967	0.983642	1	1133	tags=19%, list=15%, signal=22%	-0.717082
WP_16P112_PROXIMAL_DELETION_SYNDROME		41	0.215066	0.716314	0.911243	0.983748	1	2481	tags=44%, list=32%, signal=64%	-0.716314
REACTOME_INTERACTION_BETWEEN_L1_AND_ANKYRINS		15	0.268526	0.715808	0.831601	0.983617	1	2232	tags=40%, list=29%, signal=56%	-0.715808
REACTOME_PROCESSING_OF_DNA_DOUBLE_STRAND_BREAK_ENDS		27	0.240337	0.715592	0.882114	0.983211	1	2115	tags=37%, list=27%, signal=51%	-0.715592
REACTOME_ABC_FAMILY_PROTEINS_MEDIATED_TRANSPORT		71	0.191084	0.715122	0.966597	0.983032	1	777	tags=11%, list=10%, signal=12%	-0.715122
WP_SPHINGOLIPID_PATHWAY		18	0.265264	0.714772	0.88588	0.982774	1	880	tags=17%, list=11%, signal=19%	-0.714772
PID_PS1_PATHWAY		24	0.242828	0.71441	0.891784	0.982518	1	1493	tags=25%, list=19%, signal=31%	-0.71441
ADDYA_ERYTHROID_DIFFERENTIATION_BY_HEMIN		28	0.23829	0.713717	0.910156	0.98252	1	231	tags=7%, list=3%, signal=7%	-0.713717
DELASERNA_MYOD_TARGETS_DN		27	0.238504	0.712495	0.906977	0.983065	1	353	tags=11%, list=5%, signal=12%	-0.712495
REACTOME_RHOU_GTPASE_CYCLE		23	0.242276	0.712448	0.88998	0.98251	1	792	tags=9%, list=10%, signal=10%	-0.712448
ZHONG_RESPONSE_TO_AZACITIDINE_AND_TSA_UP		85	0.188284	0.711822	0.976143	0.982477	1	1692	tags=24%, list=22%, signal=30%	-0.711822
HOLLEMAN_ASPARAGINASE_RESISTANCE_B_ALL_UP		18	0.255623	0.710608	0.867521	0.982951	1	1228	tags=22%, list=16%, signal=26%	-0.710608
MCCLUNG_COCAINE_REWARD_5D		42	0.214205	0.71036	0.937008	0.982578	1	712	tags=12%, list=9%, signal=13%	-0.71036
REACTOME_EXTRA_NUCLEAR_ESTROGEN_SIGNALING		31	0.227823	0.706994	0.919765	0.984884	1	2185	tags=45%, list=28%, signal=62%	-0.706994
WP_THYMIC_STROMAL_LYMPHOPOIETIN_TSLP_SIGNALING_PATHWAY		21	0.248561	0.706653	0.880903	0.984598	1	2868	tags=43%, list=37%, signal=68%	-0.706653
WP_TCA_CYCLE_AKA_KREBS_OR_CITRIC_ACID_CYCLE		16	0.268807	0.706101	0.874251	0.984476	1	2437	tags=31%, list=31%, signal=45%	-0.706101
MIKKELSEN_ES_ICP_WITH_H3K4ME3_AND_H3K27ME3		34	0.223248	0.705642	0.898577	0.984273	1	1119	tags=18%, list=14%, signal=21%	-0.705642
ZHAN_MULTIPLE_MYELOMA_MF_UP		20	0.24819	0.704953	0.886406	0.98423	1	1684	tags=35%, list=22%, signal=45%	-0.704953
REACTOME_SIGNALING_BY_NUCLEAR_RECEPTORS		120	0.175822	0.702552	0.982592	0.98564	1	2185	tags=32%, list=28%, signal=43%	-0.702552
KIM_MYC_AMPLIFICATION_TARGETS_DN		39	0.216299	0.702087	0.925859	0.985403	1	1209	tags=18%, list=16%, signal=21%	-0.702087
LIN_MELANOMA_COPY_NUMBER_UP		37	0.216661	0.701509	0.926499	0.985316	1	1172	tags=19%, list=15%, signal=22%	-0.701509
REACTOME_G_PROTEIN_MEDIATED_EVENTS		28	0.230426	0.701247	0.905738	0.984925	1	1952	tags=32%, list=25%, signal=43%	-0.701247
REACTOME_SIGNALING_BY_ALK_IN_CANCER		42	0.210211	0.701093	0.926923	0.98446	1	1888	tags=29%, list=24%, signal=37%	-0.701093
WP_PRIMARY_FOCAL_SEGMENTAL_GLOMERULOSCLEROSIS_FSGS		37	0.211632	0.700196	0.924856	0.984578	1	2152	tags=41%, list=28%, signal=56%	-0.700196
WALLACE_JAK2_TARGETS_UP		15	0.267235	0.694801	0.88	0.988236	1	582	tags=13%, list=7%, signal=14%	-0.694801
KYNG_RESPONSE_TO_H2O2_VIA_ERCC6_UP		22	0.243647	0.694727	0.895604	0.987698	1	2287	tags=41%, list=29%, signal=58%	-0.694727
WP_OSTEOBLAST_DIFFERENTIATION_AND_RELATED_DISEASES		31	0.221003	0.693285	0.922156	0.9882	1	1954	tags=29%, list=25%, signal=39%	-0.693285
REACTOME_RHOBTB_GTPASE_CYCLE		28	0.22739	0.692482	0.91068	0.988194	1	635	tags=14%, list=8%, signal=15%	-0.692482
REACTOME_OPIOID_SIGNALLING		47	0.2016	0.68993	0.954	0.989502	1	2033	tags=36%, list=26%, signal=49%	-0.68993
NAKAMURA_ADIPOGENESIS_EARLY_DN		21	0.238447	0.687556	0.931689	0.990587	1	2218	tags=43%, list=28%, signal=60%	-0.687556
KEGG_LYSOSOME		74	0.185473	0.687508	0.977178	0.990037	1	2231	tags=35%, list=29%, signal=49%	-0.687508
CHESLER_BRAIN_HIGHEST_GENETIC_VARIANCE		26	0.232851	0.687453	0.919192	0.989486	1	2293	tags=42%, list=29%, signal=60%	-0.687453
BIOCARTA_ALK_PATHWAY		15	0.263958	0.685055	0.880808	0.990629	1	1954	tags=27%, list=25%, signal=36%	-0.685055
REACTOME_ESTROGEN_DEPENDENT_GENE_EXPRESSION		54	0.194125	0.684762	0.955912	0.990235	1	820	tags=13%, list=11%, signal=14%	-0.684762
BOYAULT_LIVER_CANCER_SUBCLASS_G3_DN		26	0.228883	0.684024	0.934132	0.990173	1	1492	tags=23%, list=19%, signal=28%	-0.684024
DEBIASI_APOPTOSIS_BY_REOVIRUS_INFECTION_DN		187	0.159023	0.6817	0.998058	0.991169	1	1956	tags=24%, list=25%, signal=31%	-0.6817
REACTOME_ION_TRANSPORT_BY_P_TYPE_ATPASES		26	0.229213	0.681165	0.937008	0.990939	1	1052	tags=19%, list=13%, signal=22%	-0.681165
REACTOME_DNA_DOUBLE_STRAND_BREAK_RESPONSE		25	0.232409	0.680456	0.911539	0.990836	1	2319	tags=40%, list=30%, signal=57%	-0.680456
REACTOME_RESOLUTION_OF_SISTER_CHROMATID_COHESION		54	0.195985	0.679918	0.972527	0.990584	1	1471	tags=22%, list=19%, signal=27%	-0.679918
WP_TYROBP_CAUSAL_NETWORK_IN_MICROGLIA		15	0.259677	0.678131	0.894118	0.991177	1	1177	tags=20%, list=15%, signal=24%	-0.678131
PURBEY_TARGETS_OF_CTBP1_AND_SATB1_UP		37	0.207694	0.67788	0.971264	0.990748	1	2675	tags=49%, list=34%, signal=74%	-0.67788
YANG_BREAST_CANCER_ESR1_LASER_UP		20	0.242276	0.677765	0.905769	0.990241	1	1069	tags=15%, list=14%, signal=17%	-0.677765
WP_NOTCH_SIGNALING_PATHWAY		21	0.238092	0.677474	0.913131	0.989851	1	1255	tags=19%, list=16%, signal=23%	-0.677474
REACTOME_GLUCONEOGENESIS		17	0.251421	0.677188	0.895349	0.989446	1	994	tags=18%, list=13%, signal=20%	-0.677188
HINATA_NFKB_TARGETS_FIBROBLAST_UP		38	0.207878	0.675254	0.945525	0.99014	1	721	tags=13%, list=9%, signal=14%	-0.675254
KEGG_MELANOGENESIS		27	0.223539	0.674783	0.918327	0.989857	1	1954	tags=33%, list=25%, signal=44%	-0.674783
KUMAR_PATHOGEN_LOAD_BY_MACROPHAGES		99	0.17387	0.672852	0.994264	0.990501	1	1332	tags=14%, list=17%, signal=17%	-0.672852
ZHAN_MULTIPLE_MYELOMA_CD1_VS_CD2_UP		24	0.229081	0.667624	0.920477	0.993101	1	2666	tags=46%, list=34%, signal=69%	-0.667624
KONDO_EZH2_TARGETS		80	0.17717	0.667513	0.987037	0.992564	1	2047	tags=30%, list=26%, signal=40%	-0.667513
WP_DEVELOPMENT_OF_URETERIC_COLLECTION_SYSTEM		18	0.242729	0.666236	0.897384	0.992717	1	2976	tags=44%, list=38%, signal=72%	-0.666236
JIANG_AGING_HYPOTHALAMUS_UP		31	0.212981	0.665488	0.939759	0.992585	1	2513	tags=39%, list=32%, signal=57%	-0.665488
LEIN_CEREBELLUM_MARKERS		30	0.212396	0.663977	0.940476	0.9929	1	2197	tags=33%, list=28%, signal=46%	-0.663977
JIANG_AGING_HYPOTHALAMUS_DN		24	0.22707	0.662756	0.930754	0.992994	1	1015	tags=17%, list=13%, signal=19%	-0.662756
REACTOME_RUNX1_REGULATES_GENES_INVOLVED_IN_MEGAKARYOCYTE_DIFFERENTIATION_AND_PLATELET_FUNCTION		19	0.239409	0.662738	0.916501	0.992414	1	131	tags=5%, list=2%, signal=5%	-0.662738
SIG_PIP3_SIGNALING_IN_CARDIAC_MYOCTES		33	0.209672	0.659531	0.957364	0.993663	1	2337	tags=42%, list=30%, signal=60%	-0.659531
HEIDENBLAD_AMPLIFIED_IN_PANCREATIC_CANCER		31	0.21554	0.659137	0.968518	0.993286	1	551	tags=10%, list=7%, signal=10%	-0.659137
PID_P73PATHWAY		36	0.204468	0.658506	0.956693	0.993022	1	2104	tags=28%, list=27%, signal=38%	-0.658506
REACTOME_DEACTIVATION_OF_THE_BETA_CATENIN_TRANSACTIVATING_COMPLEX		16	0.245034	0.656629	0.910603	0.993483	1	508	tags=13%, list=7%, signal=13%	-0.656629
WP_IL2_SIGNALING_PATHWAY		21	0.230211	0.655418	0.933198	0.993536	1	2891	tags=38%, list=37%, signal=60%	-0.655418
LIN_SILENCED_BY_TUMOR_MICROENVIRONMENT		28	0.213852	0.654718	0.950617	0.993328	1	782	tags=14%, list=10%, signal=16%	-0.654718
NIKOLSKY_BREAST_CANCER_1Q21_AMPLICON		15	0.251725	0.654587	0.921529	0.992818	1	1326	tags=20%, list=17%, signal=24%	-0.654587
DAVICIONI_TARGETS_OF_PAX_FOXO1_FUSIONS_DN		28	0.211135	0.651306	0.961165	0.993905	1	1805	tags=29%, list=23%, signal=37%	-0.651306
LINDSTEDT_DENDRITIC_CELL_MATURATION_A		20	0.233016	0.65069	0.927063	0.993614	1	2506	tags=45%, list=32%, signal=66%	-0.65069
ZHAN_MULTIPLE_MYELOMA_CD1_VS_CD2_DN		22	0.232771	0.650307	0.914938	0.993238	1	329	tags=9%, list=4%, signal=9%	-0.650307
REACTOME_RHOC_GTPASE_CYCLE		52	0.186261	0.648182	0.986139	0.993703	1	2105	tags=35%, list=27%, signal=47%	-0.648182
MANNE_COVID19_COMBINED_COHORT_VS_HEALTHY_DONOR_PLATELETS_UP		60	0.180979	0.647707	0.982759	0.993352	1	1673	tags=20%, list=21%, signal=25%	-0.647707
LINDVALL_IMMORTALIZED_BY_TERT_UP		29	0.210904	0.646545	0.965795	0.993307	1	2254	tags=38%, list=29%, signal=53%	-0.646545
REACTOME_SMOOTH_MUSCLE_CONTRACTION		22	0.225266	0.645712	0.936538	0.993146	1	635	tags=9%, list=8%, signal=10%	-0.645712
HOWLIN_PUBERTAL_MAMMARY_GLAND		22	0.219866	0.644085	0.941788	0.99333	1	1303	tags=23%, list=17%, signal=27%	-0.644085
BROWNE_HCMV_INFECTION_4HR_UP		20	0.228558	0.643649	0.928571	0.992956	1	1789	tags=25%, list=23%, signal=32%	-0.643649
TAKADA_GASTRIC_CANCER_COPY_NUMBER_DN		16	0.240751	0.6434	0.900398	0.992494	1	884	tags=13%, list=11%, signal=14%	-0.6434
PELLICCIOTTA_HDAC_IN_ANTIGEN_PRESENTATION_UP		50	0.187304	0.640428	0.984	0.993294	1	848	tags=12%, list=11%, signal=13%	-0.640428
REACTOME_SIGNALING_BY_SCF_KIT		23	0.220325	0.639824	0.956	0.992985	1	792	tags=13%, list=10%, signal=14%	-0.639824
REACTOME_RET_SIGNALING		22	0.220129	0.636674	0.918919	0.993786	1	3145	tags=55%, list=40%, signal=91%	-0.636674
WP_NEUROGENESIS_REGULATION_IN_THE_OLFACTORY_EPITHELIUM		31	0.203693	0.634901	0.972387	0.993972	1	697	tags=10%, list=9%, signal=11%	-0.634901
WP_2586_ARYL_HYDROCARBON_RECEPTOR_PATHWAY		19	0.231401	0.63484	0.923507	0.993417	1	2868	tags=42%, list=37%, signal=66%	-0.63484
REACTOME_RIPK1_MEDIATED_REGULATED_NECROSIS		15	0.245064	0.629656	0.936992	0.995026	1	1251	tags=20%, list=16%, signal=24%	-0.629656
WP_INTEGRINMEDIATED_CELL_ADHESION		53	0.181503	0.629547	0.988024	0.994487	1	1572	tags=21%, list=20%, signal=26%	-0.629547
KEGG_TRYPTOPHAN_METABOLISM		20	0.220718	0.625859	0.942974	0.995303	1	949	tags=15%, list=12%, signal=17%	-0.625859
REACTOME_DISEASES_OF_PROGRAMMED_CELL_DEATH		24	0.219372	0.625433	0.949416	0.994871	1	1026	tags=17%, list=13%, signal=19%	-0.625433
RAHMAN_TP53_TARGETS_PHOSPHORYLATED		16	0.233993	0.622473	0.939689	0.995397	1	2487	tags=50%, list=32%, signal=73%	-0.622473
PID_ATM_PATHWAY		17	0.234749	0.622452	0.928016	0.994827	1	2115	tags=41%, list=27%, signal=56%	-0.622452
KEGG_BETA_ALANINE_METABOLISM		17	0.22929	0.621135	0.949152	0.994714	1	1028	tags=18%, list=13%, signal=20%	-0.621135
KASLER_HDAC7_TARGETS_1_UP		102	0.160412	0.620687	1	0.99429	1	1939	tags=25%, list=25%, signal=32%	-0.620687
SU_TESTIS		23	0.214422	0.61998	0.954628	0.99396	1	1371	tags=17%, list=18%, signal=21%	-0.61998
GUTIERREZ_CHRONIC_LYMPHOCYTIC_LEUKEMIA_DN		27	0.203602	0.61839	0.968442	0.993901	1	2024	tags=30%, list=26%, signal=40%	-0.61839
REACTOME_PYRUVATE_METABOLISM		21	0.216063	0.61356	0.962477	0.99502	1	1285	tags=19%, list=16%, signal=23%	-0.61356
REACTOME_ANTIGEN_PRESENTATION_FOLDING_ASSEMBLY_AND_PEPTIDE_LOADING_OF_CLASS_I_MHC		18	0.221114	0.613278	0.949119	0.99454	1	956	tags=11%, list=12%, signal=13%	-0.613278
WILCOX_RESPONSE_TO_PROGESTERONE_DN		17	0.227409	0.610877	0.954092	0.994755	1	1867	tags=29%, list=24%, signal=39%	-0.610877
JI_RESPONSE_TO_FSH_DN		30	0.192676	0.609251	0.975807	0.994701	1	1803	tags=30%, list=23%, signal=39%	-0.609251
BONCI_TARGETS_OF_MIR15A_AND_MIR16_1		41	0.181181	0.608287	0.980806	0.994444	1	2023	tags=22%, list=26%, signal=29%	-0.608287
WP_ONECARBON_METABOLISM		15	0.226501	0.601827	0.966355	0.995756	1	2628	tags=47%, list=34%, signal=70%	-0.601827
WP_CHROMOSOMAL_AND_MICROSATELLITE_INSTABILITY_IN_COLORECTAL_CANCER		27	0.196595	0.601148	0.974952	0.995369	1	1954	tags=26%, list=25%, signal=34%	-0.601148
BURTON_ADIPOGENESIS_PEAK_AT_24HR		18	0.212167	0.588533	0.974843	0.998216	1	1760	tags=28%, list=23%, signal=36%	-0.588533
SASAI_RESISTANCE_TO_NEOPLASTIC_TRANSFROMATION		20	0.20858	0.588203	0.969112	0.997728	1	3135	tags=50%, list=40%, signal=83%	-0.588203
REACTOME_CELL_JUNCTION_ORGANIZATION		43	0.175597	0.58025	0.990158	0.999068	1	171	tags=5%, list=2%, signal=5%	-0.58025
REACTOME_SIGNALING_BY_FGFR1_IN_DISEASE		23	0.199449	0.577582	0.988024	0.999081	1	1888	tags=26%, list=24%, signal=34%	-0.577582
MIKKELSEN_MEF_HCP_WITH_H3_UNMETHYLATED		64	0.159071	0.572924	0.996255	0.999434	1	576	tags=6%, list=7%, signal=7%	-0.572924
NGUYEN_NOTCH1_TARGETS_UP		19	0.206799	0.568642	0.974659	0.999691	1	2082	tags=32%, list=27%, signal=43%	-0.568642
REACTOME_FGFR1_MUTANT_RECEPTOR_ACTIVATION		18	0.20546	0.567534	0.966874	0.999324	1	1823	tags=28%, list=23%, signal=36%	-0.567534
PID_SHP2_PATHWAY		28	0.18508	0.563138	0.984762	0.999554	1	2002	tags=25%, list=26%, signal=34%	-0.563138
VANHARANTA_UTERINE_FIBROID_UP		23	0.195508	0.561632	0.988235	0.99926	1	1671	tags=22%, list=21%, signal=28%	-0.561632
WP_DNA_IRDOUBLE_STRAND_BREAKS_AND_CELLULAR_RESPONSE_VIA_ATM		24	0.189936	0.557906	0.988764	0.999323	1	2179	tags=33%, list=28%, signal=46%	-0.557906
STONER_ESOPHAGEAL_CARCINOGENESIS_UP		22	0.192817	0.557073	0.988349	0.998866	1	1646	tags=18%, list=21%, signal=23%	-0.557073
BIOCARTA_CARM_ER_PATHWAY		18	0.206598	0.557061	0.976517	0.998295	1	1848	tags=28%, list=24%, signal=36%	-0.557061
REACTOME_RHOQ_GTPASE_CYCLE		35	0.172789	0.556467	0.998081	0.997807	1	2018	tags=26%, list=26%, signal=35%	-0.556467
HOLLERN_EMT_BREAST_TUMOR_DN		25	0.185597	0.556156	0.990403	0.9973	1	2852	tags=44%, list=37%, signal=69%	-0.556156
ULE_SPLICING_VIA_NOVA2		25	0.183899	0.54048	0.988189	0.998983	1	1216	tags=16%, list=16%, signal=19%	-0.54048
WP_SPHINGOLIPID_METABOLISM_IN_SENESCENCE		18	0.195922	0.538672	0.979716	0.998646	1	2526	tags=33%, list=32%, signal=49%	-0.538672
WP_NANOPARTICLEMEDIATED_ACTIVATION_OF_RECEPTOR_SIGNALING		17	0.196325	0.532572	0.98482	0.998793	1	6271	tags=100%, list=80%, signal=509%	-0.532572
REACTOME_NITRIC_OXIDE_STIMULATES_GUANYLATE_CYCLASE		15	0.200594	0.524828	0.982592	0.999062	1	2053	tags=33%, list=26%, signal=45%	-0.524828
REACTOME_INTERLEUKIN_3_INTERLEUKIN_5_AND_GM_CSF_SIGNALING		22	0.179447	0.520899	0.996139	0.998907	1	2153	tags=27%, list=28%, signal=38%	-0.520899
FOROUTAN_PRODRANK_TGFB_EMT_DN		32	0.166088	0.520167	0.993976	0.998393	1	2918	tags=47%, list=37%, signal=75%	-0.520167
REACTOME_RND1_GTPASE_CYCLE		24	0.173561	0.516566	1	0.99815	1	2730	tags=42%, list=35%, signal=64%	-0.516566
REACTOME_FOXO_MEDIATED_TRANSCRIPTION		23	0.175486	0.513191	0.992337	0.997882	1	2422	tags=35%, list=31%, signal=50%	-0.513191
KYNG_ENVIRONMENTAL_STRESS_RESPONSE_NOT_BY_4NQO_IN_WS		18	0.178207	0.500698	0.990421	0.998254	1	2082	tags=28%, list=27%, signal=38%	-0.500698
PID_IL2_PI3K_PATHWAY		19	0.166635	0.455212	0.994129	0.999895	1	792	tags=11%, list=10%, signal=12%	-0.455212
REACTOME_PARASITE_INFECTION		39	0.138662	0.451917	1	0.999426	1	1389	tags=15%, list=18%, signal=19%	-0.451917
VILLANUEVA_LIVER_CANCER_KRT19_DN		30	0.14294	0.443115	1	0.999112	1	2644	tags=33%, list=34%, signal=50%	-0.443115
REACTOME_MRNA_SPLICING	Details ...	159	-0.522415	-2.17515	0	0.00749832	0.007	1795	tags=48%, list=23%, signal=62%	2.17515
REACTOME_PROCESSING_OF_CAPPED_INTRON_CONTAINING_PRE_MRNA	Details ...	207	-0.496555	-2.16275	0	0.00374916	0.007	1795	tags=45%, list=23%, signal=57%	2.16275
KEGG_SPLICEOSOME	Details ...	106	-0.538119	-2.12027	0	0.00532569	0.015	1792	tags=51%, list=23%, signal=65%	2.12027
WP_MRNA_PROCESSING	Details ...	99	-0.535667	-2.10349	0	0.00588636	0.022	2241	tags=54%, list=29%, signal=74%	2.10349
REACTOME_CLASS_I_PEROXISOMAL_MEMBRANE_PROTEIN_IMPORT	Details ...	16	-0.751746	-2.04745	0	0.0118881	0.059	1620	tags=69%, list=21%, signal=87%	2.04745
WP_BASE_EXCISION_REPAIR	Details ...	15	-0.792277	-2.04629	0	0.00990678	0.059	519	tags=40%, list=7%, signal=43%	2.04629
LUI_THYROID_CANCER_CLUSTER_1	Details ...	22	-0.695537	-2.0142	0.00202429	0.0167346	0.116	1219	tags=41%, list=16%, signal=48%	2.0142
CHEN_HOXA5_TARGETS_9HR_DN	Details ...	24	-0.620638	-1.85487	0	0.166013	0.747	717	tags=38%, list=9%, signal=41%	1.85487
REACTOME_FATTY_ACYL_COA_BIOSYNTHESIS	Details ...	21	-0.644148	-1.84588	0.00208768	0.163817	0.784	965	tags=48%, list=12%, signal=54%	1.84588
RIZ_ERYTHROID_DIFFERENTIATION_CCNE1	Details ...	16	-0.669632	-1.80576	0.00393701	0.239023	0.92	1101	tags=44%, list=14%, signal=51%	1.80576
WP_CHOLESTEROL_METABOLISM_WITH_BLOCH_AND_KANDUTSCHRUSSELL_PATHWAYS	Details ...	31	-0.581667	-1.79022	0	0.26326	0.955	1236	tags=39%, list=16%, signal=46%	1.79022
REACTOME_TRANSPORT_OF_MATURE_TRANSCRIPT_TO_CYTOPLASM	Details ...	72	-0.478937	-1.78827	0	0.24737	0.959	1771	tags=42%, list=23%, signal=53%	1.78827
KEGG_PEROXISOME	Details ...	58	-0.501914	-1.78685	0.00196078	0.232556	0.959	1773	tags=34%, list=23%, signal=44%	1.78685
BACOLOD_RESISTANCE_TO_ALKYLATING_AGENTS_DN	Details ...	31	-0.571015	-1.77974	0.00607287	0.232669	0.966	1040	tags=32%, list=13%, signal=37%	1.77974
RIZKI_TUMOR_INVASIVENESS_2D_DN	Details ...	36	-0.538173	-1.77792	0	0.221739	0.969	813	tags=36%, list=10%, signal=40%	1.77792
SHEPARD_CRASH_AND_BURN_MUTANT_DN	Details ...	70	-0.47285	-1.74378	0	0.296935	0.994	2168	tags=51%, list=28%, signal=71%	1.74378
REACTOME_RNA_POLYMERASE_II_TRANSCRIPTION_TERMINATION	Details ...	53	-0.498732	-1.72697	0	0.333999	0.996	2174	tags=49%, list=28%, signal=68%	1.72697
GARGALOVIC_RESPONSE_TO_OXIDIZED_PHOSPHOLIPIDS_TURQUOISE_DN	Details ...	21	-0.603081	-1.72439	0.00982318	0.323577	0.996	1735	tags=48%, list=22%, signal=61%	1.72439
PUJANA_BRCA_CENTERED_NETWORK	Details ...	67	-0.460761	-1.71533	0	0.334827	0.996	1465	tags=34%, list=19%, signal=42%	1.71533
SCHLOSSER_MYC_TARGETS_AND_SERUM_RESPONSE_UP	Details ...	36	-0.521709	-1.70576	0.00204918	0.349494	0.999	1784	tags=47%, list=23%, signal=61%	1.70576
SEKI_INFLAMMATORY_RESPONSE_LPS_UP		15	-0.654129	-1.69597	0.00821355	0.367348	1	493	tags=27%, list=6%, signal=28%	1.69597
REACTOME_HDACS_DEACETYLATE_HISTONES		19	-0.614294	-1.69547	0.0104384	0.352287	1	1684	tags=47%, list=22%, signal=60%	1.69547
IIZUKA_LIVER_CANCER_PROGRESSION_G2_G3_UP		15	-0.628077	-1.69027	0.016632	0.354381	1	551	tags=27%, list=7%, signal=29%	1.69027
BOYLAN_MULTIPLE_MYELOMA_C_UP		25	-0.565749	-1.6883	0.0104603	0.346021	1	797	tags=28%, list=10%, signal=31%	1.6883
MARIADASON_RESPONSE_TO_BUTYRATE_SULINDAC_6		21	-0.577205	-1.66614	0.0144628	0.409341	1	2394	tags=57%, list=31%, signal=82%	1.66614
HOLLEMAN_VINCRISTINE_RESISTANCE_ALL_DN		17	-0.615036	-1.66577	0.0103734	0.395053	1	1343	tags=53%, list=17%, signal=64%	1.66577
DACOSTA_ERCC3_ALLELE_XPCS_VS_TTD_DN		19	-0.601741	-1.66341	0.00787402	0.38864	1	650	tags=26%, list=8%, signal=29%	1.66341
WAMUNYOKOLI_OVARIAN_CANCER_GRADES_1_2_DN		31	-0.537787	-1.66282	0.00198807	0.376146	1	1995	tags=55%, list=26%, signal=73%	1.66282
VERNELL_RETINOBLASTOMA_PATHWAY_UP		25	-0.551173	-1.66276	0.00204499	0.363403	1	1030	tags=40%, list=13%, signal=46%	1.66276
OUELLET_OVARIAN_CANCER_INVASIVE_VS_LMP_UP		72	-0.447396	-1.65753	0.00204082	0.36802	1	682	tags=19%, list=9%, signal=21%	1.65753
WP_CCL18_SIGNALING_PATHWAY		15	-0.637378	-1.6569	0.00197628	0.358315	1	281	tags=27%, list=4%, signal=28%	1.6569
RAMASWAMY_METASTASIS_UP		44	-0.48058	-1.64778	0.00201207	0.375998	1	1597	tags=34%, list=20%, signal=43%	1.64778
PUJANA_XPRSS_INT_NETWORK		94	-0.425386	-1.64275	0.00198413	0.382311	1	1514	tags=33%, list=19%, signal=40%	1.64275
BENPORATH_ES_CORE_NINE_CORRELATED		34	-0.509954	-1.64185	0.010101	0.373912	1	1812	tags=44%, list=23%, signal=57%	1.64185
BIDUS_METASTASIS_UP		120	-0.411876	-1.63824	0.0040404	0.376014	1	1475	tags=35%, list=19%, signal=42%	1.63824
LE_EGR2_TARGETS_UP		47	-0.484043	-1.63664	0.0105708	0.370394	1	2196	tags=49%, list=28%, signal=68%	1.63664
REACTOME_ATF4_ACTIVATES_GENES_IN_RESPONSE_TO_ENDOPLASMIC_RETICULUM_STRESS		15	-0.637821	-1.63376	0.0257937	0.370533	1	715	tags=33%, list=9%, signal=37%	1.63376
PUJANA_BREAST_CANCER_WITH_BRCA1_MUTATED_UP		25	-0.557004	-1.63337	0.016	0.361855	1	1236	tags=44%, list=16%, signal=52%	1.63337
IIZUKA_LIVER_CANCER_PROGRESSION_G1_G2_DN		20	-0.575097	-1.62733	0.015748	0.372168	1	1549	tags=45%, list=20%, signal=56%	1.62733
REACTOME_RESOLUTION_OF_ABASIC_SITES_AP_SITES		21	-0.568735	-1.61976	0.0145833	0.387764	1	707	tags=29%, list=9%, signal=31%	1.61976
SPIELMAN_LYMPHOBLAST_EUROPEAN_VS_ASIAN_UP		292	-0.361239	-1.61926	0	0.380189	1	1108	tags=23%, list=14%, signal=25%	1.61926
YUAN_ZNF143_PARTNERS		17	-0.605546	-1.61714	0.0193424	0.377874	1	1633	tags=59%, list=21%, signal=74%	1.61714
REACTOME_PERK_REGULATES_GENE_EXPRESSION		18	-0.593146	-1.60744	0.00808081	0.401328	1	715	tags=28%, list=9%, signal=31%	1.60744
YAMAZAKI_TCEB3_TARGETS_UP		91	-0.411241	-1.59323	0.00403226	0.440613	1	953	tags=25%, list=12%, signal=28%	1.59323
WHITFIELD_CELL_CYCLE_G2_M		91	-0.409524	-1.58607	0.00218818	0.458154	1	1852	tags=36%, list=24%, signal=47%	1.58607
BOYAULT_LIVER_CANCER_SUBCLASS_G123_UP		27	-0.51376	-1.58497	0.0201613	0.452651	1	1459	tags=41%, list=19%, signal=50%	1.58497
ICHIBA_GRAFT_VERSUS_HOST_DISEASE_D7_UP		43	-0.468741	-1.58174	0.0145228	0.455786	1	1660	tags=35%, list=21%, signal=44%	1.58174
HUANG_DASATINIB_RESISTANCE_DN		38	-0.47762	-1.57335	0.0105708	0.477728	1	1731	tags=50%, list=22%, signal=64%	1.57335
JISON_SICKLE_CELL_DISEASE_DN		107	-0.396968	-1.5728	0.0039604	0.470215	1	1386	tags=31%, list=18%, signal=37%	1.5728
RUTELLA_RESPONSE_TO_HGF_VS_CSF2RB_AND_IL4_DN		117	-0.396477	-1.56935	0.0040404	0.474056	1	1491	tags=36%, list=19%, signal=44%	1.56935
REACTOME_EPIGENETIC_REGULATION_OF_GENE_EXPRESSION		47	-0.459981	-1.56856	0.012024	0.467744	1	1417	tags=40%, list=18%, signal=49%	1.56856
GOBERT_CORE_OLIGODENDROCYTE_DIFFERENTIATION		23	-0.533131	-1.56524	0.0215264	0.4722	1	1169	tags=30%, list=15%, signal=36%	1.56524
BERNARD_PPAPDC1B_TARGETS_UP		30	-0.506583	-1.56301	0.0243902	0.471631	1	1496	tags=40%, list=19%, signal=49%	1.56301
LEIN_NEURON_MARKERS		49	-0.452298	-1.56242	0.0183673	0.465084	1	1420	tags=39%, list=18%, signal=47%	1.56242
VERHAAK_GLIOBLASTOMA_PRONEURAL		101	-0.403747	-1.55299	0.0040404	0.491803	1	1645	tags=33%, list=21%, signal=41%	1.55299
WAKASUGI_HAVE_ZNF143_BINDING_SITES		25	-0.513459	-1.54936	0.0365854	0.497583	1	519	tags=24%, list=7%, signal=26%	1.54936
REACTOME_TRANSCRIPTIONAL_ACTIVITY_OF_SMAD2_SMAD3_SMAD4_HETEROTRIMER		21	-0.53277	-1.53919	0.0438095	0.528821	1	853	tags=19%, list=11%, signal=21%	1.53919
GENTILE_UV_RESPONSE_CLUSTER_D2		21	-0.540442	-1.53839	0.0303605	0.522978	1	1025	tags=38%, list=13%, signal=44%	1.53839
BRACHAT_RESPONSE_TO_METHOTREXATE_DN		18	-0.557939	-1.53596	0.0338645	0.523222	1	423	tags=28%, list=5%, signal=29%	1.53596
MARKEY_RB1_ACUTE_LOF_UP		104	-0.386229	-1.52898	0.0102669	0.543176	1	1479	tags=31%, list=19%, signal=37%	1.52898
WP_MITOCHONDRIAL_LONG_CHAIN_FATTY_ACID_BETAOXIDATION		15	-0.598742	-1.52877	0.0399202	0.535152	1	1874	tags=60%, list=24%, signal=79%	1.52877
PUJANA_BRCA2_PCC_NETWORK		218	-0.348767	-1.52478	0	0.544156	1	1524	tags=28%, list=20%, signal=34%	1.52478
FRASOR_TAMOXIFEN_RESPONSE_UP		24	-0.506956	-1.50666	0.0243408	0.614289	1	1315	tags=38%, list=17%, signal=45%	1.50666
RICKMAN_TUMOR_DIFFERENTIATED_WELL_VS_POORLY_UP		119	-0.373991	-1.5005	0.00803213	0.633952	1	1315	tags=29%, list=17%, signal=34%	1.5005
REACTOME_MITOCHONDRIAL_CALCIUM_ION_TRANSPORT		17	-0.557742	-1.49932	0.0623782	0.629773	1	1387	tags=35%, list=18%, signal=43%	1.49932
GENTILE_UV_RESPONSE_CLUSTER_D8		19	-0.53965	-1.4924	0.0436508	0.653014	1	634	tags=32%, list=8%, signal=34%	1.4924
REACTOME_IMMUNOREGULATORY_INTERACTIONS_BETWEEN_A_LYMPHOID_AND_A_NON_LYMPHOID_CELL		22	-0.516393	-1.49128	0.0462777	0.648954	1	924	tags=23%, list=12%, signal=26%	1.49128
CHIANG_LIVER_CANCER_SUBCLASS_PROLIFERATION_UP		50	-0.42745	-1.49041	0.0205761	0.643971	1	775	tags=22%, list=10%, signal=24%	1.49041
BERENJENO_ROCK_SIGNALING_NOT_VIA_RHOA_DN		27	-0.497827	-1.48962	0.0333333	0.638288	1	1854	tags=44%, list=24%, signal=58%	1.48962
BAE_BRCA1_TARGETS_UP		35	-0.45904	-1.48891	0.0388548	0.632584	1	701	tags=26%, list=9%, signal=28%	1.48891
WP_CIRCADIAN_RHYTHM_GENES		89	-0.382281	-1.48459	0.00608519	0.64417	1	2082	tags=38%, list=27%, signal=52%	1.48459
REACTOME_TRANSPORT_OF_MATURE_MRNAS_DERIVED_FROM_INTRONLESS_TRANSCRIPTS		40	-0.449006	-1.48416	0.026975	0.637261	1	1706	tags=40%, list=22%, signal=51%	1.48416
WP_SLEEP_REGULATION		15	-0.579856	-1.48404	0.0629921	0.629086	1	159	tags=13%, list=2%, signal=14%	1.48404
REACTOME_PROCESSING_OF_INTRONLESS_PRE_MRNAS		17	-0.5455	-1.48195	0.0400802	0.62997	1	1457	tags=35%, list=19%, signal=43%	1.48195
REACTOME_REGULATION_OF_TP53_ACTIVITY_THROUGH_ACETYLATION		16	-0.549554	-1.48145	0.0692464	0.623939	1	1735	tags=63%, list=22%, signal=80%	1.48145
MCLACHLAN_DENTAL_CARIES_DN		44	-0.431847	-1.47999	0.0228216	0.621932	1	1291	tags=27%, list=17%, signal=32%	1.47999
WP_MITOCHONDRIAL_COMPLEX_IV_ASSEMBLY		22	-0.516729	-1.47393	0.0615672	0.641566	1	255	tags=18%, list=3%, signal=19%	1.47393
REACTOME_TRANSPORT_OF_THE_SLBP_DEPENDANT_MATURE_MRNA		33	-0.457662	-1.4711	0.0529532	0.646692	1	1706	tags=42%, list=22%, signal=54%	1.4711
SANSOM_APC_TARGETS_UP		50	-0.424808	-1.46915	0.0262626	0.647469	1	1064	tags=30%, list=14%, signal=35%	1.46915
REACTOME_SIGNALING_BY_NOTCH3		17	-0.543788	-1.46872	0.0469388	0.641228	1	1078	tags=35%, list=14%, signal=41%	1.46872
CHIARADONNA_NEOPLASTIC_TRANSFORMATION_KRAS_UP		66	-0.401393	-1.46844	0.028169	0.634491	1	1475	tags=30%, list=19%, signal=37%	1.46844
REACTOME_BASE_EXCISION_REPAIR		24	-0.504036	-1.46442	0.0296443	0.644387	1	707	tags=25%, list=9%, signal=27%	1.46442
WP_MALE_INFERTILITY		54	-0.415607	-1.46259	0.0314961	0.645493	1	1860	tags=41%, list=24%, signal=53%	1.46259
REACTOME_PROTEIN_LOCALIZATION		119	-0.36437	-1.46066	0.00804829	0.646585	1	1868	tags=34%, list=24%, signal=44%	1.46066
MMS_MOUSE_LYMPH_HIGH_4HRS_UP		25	-0.492159	-1.4587	0.054326	0.648049	1	1440	tags=44%, list=18%, signal=54%	1.4587
REACTOME_BRANCHED_CHAIN_AMINO_ACID_CATABOLISM		21	-0.50592	-1.455	0.0465587	0.657313	1	738	tags=29%, list=9%, signal=31%	1.455
FISCHER_DREAM_TARGETS		419	-0.310636	-1.45359	0	0.65627	1	969	tags=19%, list=12%, signal=21%	1.45359
RUTELLA_RESPONSE_TO_HGF_DN		103	-0.371178	-1.45312	0.00426439	0.651103	1	1501	tags=34%, list=19%, signal=42%	1.45312
DORSAM_HOXA9_TARGETS_UP		22	-0.50289	-1.45292	0.0477178	0.644529	1	647	tags=27%, list=8%, signal=30%	1.45292
WP_TYPE_2_PAPILLARY_RENAL_CELL_CARCINOMA		16	-0.551774	-1.45219	0.0469388	0.640634	1	1078	tags=31%, list=14%, signal=36%	1.45219
REACTOME_DEADENYLATION_DEPENDENT_MRNA_DECAY		48	-0.425159	-1.45136	0.038	0.637028	1	1386	tags=38%, list=18%, signal=45%	1.45136
ISHIDA_E2F_TARGETS		18	-0.526137	-1.4498	0.0546218	0.636959	1	106	tags=17%, list=1%, signal=17%	1.4498
STEIN_ESR1_TARGETS		36	-0.439783	-1.44832	0.0502092	0.637333	1	1411	tags=42%, list=18%, signal=51%	1.44832
REACTOME_MRNA_DECAY_BY_5_TO_3_EXORIBONUCLEASE		15	-0.55554	-1.44819	0.0761719	0.631136	1	1513	tags=53%, list=19%, signal=66%	1.44819
PLASARI_TGFB1_TARGETS_10HR_DN		108	-0.363847	-1.44522	0.00816326	0.638029	1	942	tags=19%, list=12%, signal=21%	1.44522
ICHIBA_GRAFT_VERSUS_HOST_DISEASE_35D_UP		46	-0.419605	-1.44283	0.0447154	0.641694	1	1827	tags=35%, list=23%, signal=45%	1.44283
OSMAN_BLADDER_CANCER_DN		219	-0.329661	-1.43929	0.004329	0.651101	1	1756	tags=32%, list=23%, signal=41%	1.43929
WIEDERSCHAIN_TARGETS_OF_BMI1_AND_PCGF2		16	-0.540224	-1.43343	0.0758197	0.671003	1	1954	tags=63%, list=25%, signal=83%	1.43343
STEARMAN_TUMOR_FIELD_EFFECT_UP		17	-0.536918	-1.43141	0.0753564	0.674396	1	2155	tags=53%, list=28%, signal=73%	1.43141
LAU_APOPTOSIS_CDKN2A_UP		26	-0.475816	-1.43093	0.0663812	0.669902	1	362	tags=15%, list=5%, signal=16%	1.43093
BOYLAN_MULTIPLE_MYELOMA_C_CLUSTER_UP		15	-0.542804	-1.42875	0.0916335	0.673805	1	797	tags=27%, list=10%, signal=30%	1.42875
GRESHOCK_CANCER_COPY_NUMBER_UP		158	-0.338476	-1.42845	0.0102249	0.6687	1	1797	tags=34%, list=23%, signal=43%	1.42845
REACTOME_PEROXISOMAL_PROTEIN_IMPORT		42	-0.426772	-1.4261	0.0512821	0.672671	1	1773	tags=29%, list=23%, signal=37%	1.4261
REACTOME_FORMATION_OF_RNA_POL_II_ELONGATION_COMPLEX		48	-0.415555	-1.42492	0.0453649	0.67158	1	1541	tags=35%, list=20%, signal=44%	1.42492
WP_MICROGLIA_PATHOGEN_PHAGOCYTOSIS_PATHWAY		21	-0.50833	-1.42399	0.0575693	0.669116	1	924	tags=19%, list=12%, signal=22%	1.42399
PUJANA_CHEK2_PCC_NETWORK		477	-0.304385	-1.4232	0	0.666391	1	1540	tags=27%, list=20%, signal=32%	1.4232
KEGG_VASOPRESSIN_REGULATED_WATER_REABSORPTION		22	-0.491221	-1.42217	0.0649087	0.664781	1	1064	tags=27%, list=14%, signal=31%	1.42217
WELCSH_BRCA1_TARGETS_DN		99	-0.366371	-1.422	0.0142276	0.659344	1	1805	tags=35%, list=23%, signal=45%	1.422
WHITFIELD_CELL_CYCLE_G2		55	-0.404119	-1.41486	0.0425532	0.685812	1	1475	tags=31%, list=19%, signal=38%	1.41486
CHIANG_LIVER_CANCER_SUBCLASS_INTERFERON_DN		20	-0.512806	-1.4139	0.077821	0.683866	1	943	tags=35%, list=12%, signal=40%	1.4139
CHIARADONNA_NEOPLASTIC_TRANSFORMATION_CDC25_UP		62	-0.391749	-1.41236	0.0406852	0.684196	1	1019	tags=26%, list=13%, signal=29%	1.41236
WP_VASOPRESSINREGULATED_WATER_REABSORPTION		22	-0.491221	-1.41179	0.0728347	0.680581	1	1064	tags=27%, list=14%, signal=31%	1.41179
BILBAN_B_CLL_LPL_UP		27	-0.470875	-1.41172	0.0402414	0.674776	1	727	tags=22%, list=9%, signal=24%	1.41172
MARTINEZ_RB1_AND_TP53_TARGETS_DN		267	-0.310845	-1.40855	0.00214133	0.683258	1	1725	tags=30%, list=22%, signal=37%	1.40855
MISSIAGLIA_REGULATED_BY_METHYLATION_DN		60	-0.393215	-1.40645	0.0420168	0.687064	1	1475	tags=33%, list=19%, signal=41%	1.40645
HOFFMANN_SMALL_PRE_BII_TO_IMMATURE_B_LYMPHOCYTE_DN		18	-0.512934	-1.40605	0.0940695	0.683044	1	1064	tags=39%, list=14%, signal=45%	1.40605
BERTUCCI_INVASIVE_CARCINOMA_DUCTAL_VS_LOBULAR_DN		18	-0.510033	-1.40253	0.0707071	0.693303	1	1825	tags=44%, list=23%, signal=58%	1.40253
TAYLOR_METHYLATED_IN_ACUTE_LYMPHOBLASTIC_LEUKEMIA		39	-0.428112	-1.3981	0.0698152	0.706638	1	1785	tags=36%, list=23%, signal=46%	1.3981
HERNANDEZ_MITOTIC_ARREST_BY_DOCETAXEL_2_UP		19	-0.503752	-1.39803	0.0951417	0.701065	1	982	tags=26%, list=13%, signal=30%	1.39803
PEDRIOLI_MIR31_TARGETS_UP		70	-0.380857	-1.3979	0.0314607	0.695743	1	1186	tags=27%, list=15%, signal=32%	1.3979
WP_FATTY_ACID_BETAOXIDATION		28	-0.457932	-1.39696	0.0891473	0.694119	1	1874	tags=39%, list=24%, signal=52%	1.39696
SENESE_HDAC1_TARGETS_DN		119	-0.345407	-1.39466	0.016632	0.698811	1	1626	tags=31%, list=21%, signal=39%	1.39466
BASAKI_YBX1_TARGETS_DN		188	-0.320584	-1.39428	0.00869565	0.694774	1	1164	tags=23%, list=15%, signal=26%	1.39428
ONDER_CDH1_TARGETS_1_DN		67	-0.375617	-1.39206	0.0433884	0.699787	1	1521	tags=36%, list=20%, signal=44%	1.39206
REACTOME_RESOLUTION_OF_AP_SITES_VIA_THE_MULTIPLE_NUCLEOTIDE_PATCH_REPLACEMENT_PATHWAY		16	-0.521615	-1.39201	0.104255	0.694423	1	707	tags=25%, list=9%, signal=27%	1.39201
REACTOME_DEADENYLATION_OF_MRNA		18	-0.495688	-1.39103	0.0888889	0.693137	1	665	tags=33%, list=9%, signal=36%	1.39103
RICKMAN_HEAD_AND_NECK_CANCER_A		39	-0.421856	-1.39035	0.0521921	0.690798	1	658	tags=18%, list=8%, signal=20%	1.39035
QI_PLASMACYTOMA_DN		54	-0.39709	-1.38799	0.0405405	0.696124	1	1347	tags=26%, list=17%, signal=31%	1.38799
MONNIER_POSTRADIATION_TUMOR_ESCAPE_UP		244	-0.313498	-1.3879	0.00845666	0.691204	1	1965	tags=37%, list=25%, signal=48%	1.3879
WP_HEPATITIS_C_AND_HEPATOCELLULAR_CARCINOMA		21	-0.489797	-1.38638	0.0927835	0.692801	1	817	tags=29%, list=10%, signal=32%	1.38638
REACTOME_E3_UBIQUITIN_LIGASES_UBIQUITINATE_TARGET_PROTEINS		25	-0.464975	-1.3863	0.079918	0.687895	1	1670	tags=40%, list=21%, signal=51%	1.3863
KARLSSON_TGFB1_TARGETS_DN		118	-0.342386	-1.3857	0.0186335	0.685351	1	1655	tags=30%, list=21%, signal=37%	1.3857
MORI_IMMATURE_B_LYMPHOCYTE_DN		30	-0.451366	-1.38357	0.0596708	0.689619	1	1698	tags=47%, list=22%, signal=59%	1.38357
BILBAN_B_CLL_LPL_DN		19	-0.501037	-1.38326	0.100642	0.685988	1	1087	tags=32%, list=14%, signal=37%	1.38326
MOOTHA_FFA_OXYDATION		23	-0.475531	-1.38198	0.0801603	0.686378	1	1874	tags=43%, list=24%, signal=57%	1.38198
HU_GENOTOXIC_DAMAGE_24HR		17	-0.512232	-1.37838	0.101031	0.697072	1	1485	tags=35%, list=19%, signal=43%	1.37838
SESTO_RESPONSE_TO_UV_C6		21	-0.481148	-1.37723	0.107216	0.697271	1	1170	tags=29%, list=15%, signal=34%	1.37723
REACTOME_GPVI_MEDIATED_ACTIVATION_CASCADE		18	-0.500004	-1.37708	0.100604	0.692788	1	753	tags=22%, list=10%, signal=25%	1.37708
MORI_LARGE_PRE_BII_LYMPHOCYTE_UP		31	-0.439754	-1.37663	0.077551	0.689647	1	1706	tags=42%, list=22%, signal=53%	1.37663
GERHOLD_ADIPOGENESIS_DN		37	-0.417131	-1.3716	0.0727969	0.706755	1	515	tags=19%, list=7%, signal=20%	1.3716
KEGG_RNA_DEGRADATION		46	-0.400758	-1.37117	0.0547667	0.703683	1	1340	tags=35%, list=17%, signal=42%	1.37117
LY_AGING_OLD_DN		25	-0.453446	-1.36935	0.0779727	0.70665	1	805	tags=20%, list=10%, signal=22%	1.36935
PUIFFE_INVASION_INHIBITED_BY_ASCITES_UP		38	-0.415341	-1.36883	0.055914	0.704211	1	1978	tags=42%, list=25%, signal=56%	1.36883
REACTOME_LAMININ_INTERACTIONS		19	-0.487234	-1.36487	0.08742	0.717068	1	1605	tags=47%, list=21%, signal=59%	1.36487
PICCALUGA_ANGIOIMMUNOBLASTIC_LYMPHOMA_DN		55	-0.387883	-1.36292	0.0496032	0.721373	1	785	tags=22%, list=10%, signal=24%	1.36292
CAIRO_HEPATOBLASTOMA_CLASSES_UP		403	-0.292573	-1.36259	0.0020284	0.718058	1	1419	tags=24%, list=18%, signal=28%	1.36259
KLEIN_PRIMARY_EFFUSION_LYMPHOMA_DN		22	-0.479493	-1.36244	0.0899796	0.713829	1	1573	tags=32%, list=20%, signal=40%	1.36244
BECKER_TAMOXIFEN_RESISTANCE_DN		21	-0.481356	-1.36206	0.0857143	0.710718	1	1389	tags=43%, list=18%, signal=52%	1.36206
FAELT_B_CLL_WITH_VH3_21_UP		27	-0.451126	-1.36167	0.0938776	0.707597	1	1103	tags=33%, list=14%, signal=39%	1.36167
REACTOME_SUMOYLATION_OF_TRANSCRIPTION_COFACTORS		25	-0.45968	-1.36069	0.0907173	0.707236	1	1984	tags=48%, list=25%, signal=64%	1.36069
TIEN_INTESTINE_PROBIOTICS_24HR_DN		131	-0.332979	-1.35919	0.0187891	0.708927	1	1289	tags=23%, list=17%, signal=27%	1.35919
BILANGES_SERUM_SENSITIVE_GENES		41	-0.406833	-1.35904	0.0790514	0.704853	1	2020	tags=44%, list=26%, signal=59%	1.35904
RHODES_CANCER_META_SIGNATURE		34	-0.428379	-1.3589	0.1	0.700878	1	1949	tags=41%, list=25%, signal=55%	1.3589
REACTOME_SUMOYLATION		94	-0.348804	-1.35828	0.0339321	0.699123	1	1755	tags=35%, list=23%, signal=45%	1.35828
REACTOME_MITOTIC_PROPHASE		55	-0.386846	-1.35706	0.0680412	0.700042	1	1802	tags=36%, list=23%, signal=47%	1.35706
REACTOME_RNA_POLYMERASE_I_TRANSCRIPTION		30	-0.443524	-1.35594	0.102823	0.700256	1	1417	tags=47%, list=18%, signal=57%	1.35594
CHNG_MULTIPLE_MYELOMA_HYPERPLOID_UP		41	-0.401838	-1.35345	0.0798319	0.706491	1	1502	tags=32%, list=19%, signal=39%	1.35345
WP_DNA_REPAIR_PATHWAYS_FULL_NETWORK		61	-0.371802	-1.3531	0.049569	0.703489	1	1596	tags=36%, list=20%, signal=45%	1.3531
REACTOME_RUNX1_INTERACTS_WITH_CO_FACTORS_WHOSE_PRECISE_EFFECT_ON_RUNX1_TARGETS_IS_NOT_KNOWN		20	-0.486366	-1.35241	0.0901804	0.702013	1	1703	tags=50%, list=22%, signal=64%	1.35241
REACTOME_HIV_TRANSCRIPTION_ELONGATION		37	-0.409406	-1.35173	0.0806452	0.700566	1	1395	tags=35%, list=18%, signal=43%	1.35173
REACTOME_INTERACTIONS_OF_VPR_WITH_HOST_CELLULAR_PROTEINS		33	-0.426627	-1.35074	0.0892495	0.70077	1	1629	tags=36%, list=21%, signal=46%	1.35074
REACTOME_AZATHIOPRINE_ADME		17	-0.499512	-1.34964	0.101594	0.701362	1	753	tags=18%, list=10%, signal=19%	1.34964
RASHI_RESPONSE_TO_IONIZING_RADIATION_5		67	-0.364322	-1.34418	0.0443975	0.720713	1	724	tags=21%, list=9%, signal=23%	1.34418
BANDRES_RESPONSE_TO_CARMUSTIN_MGMT_48HR_DN		64	-0.372595	-1.344	0.0675944	0.717016	1	369	tags=16%, list=5%, signal=16%	1.344
REACTOME_SUMOYLATION_OF_SUMOYLATION_PROTEINS		33	-0.423449	-1.34311	0.0755102	0.716811	1	1629	tags=36%, list=21%, signal=46%	1.34311
NAKAYAMA_SOFT_TISSUE_TUMORS_PCA1_DN		33	-0.429374	-1.3416	0.0967742	0.718874	1	905	tags=24%, list=12%, signal=27%	1.3416
AMIT_EGF_RESPONSE_40_HELA		15	-0.503326	-1.33954	0.122288	0.724242	1	1501	tags=53%, list=19%, signal=66%	1.33954
MCBRYAN_PUBERTAL_BREAST_5_6WK_DN		79	-0.352895	-1.33811	0.0515873	0.726093	1	1697	tags=30%, list=22%, signal=38%	1.33811
LUI_THYROID_CANCER_PAX8_PPARG_UP		22	-0.454144	-1.33798	0.0971074	0.722349	1	1219	tags=27%, list=16%, signal=32%	1.33798
NOUZOVA_TRETINOIN_AND_H4_ACETYLATION		93	-0.339703	-1.33663	0.0292887	0.724171	1	1567	tags=31%, list=20%, signal=39%	1.33663
REN_ALVEOLAR_RHABDOMYOSARCOMA_UP		39	-0.398705	-1.33612	0.06639	0.722122	1	2221	tags=44%, list=28%, signal=61%	1.33612
REN_BOUND_BY_E2F		21	-0.471956	-1.33566	0.111554	0.719806	1	797	tags=24%, list=10%, signal=26%	1.33566
OKUMURA_INFLAMMATORY_RESPONSE_LPS		82	-0.35269	-1.33525	0.05	0.717298	1	1712	tags=38%, list=22%, signal=48%	1.33525
ZHANG_BREAST_CANCER_PROGENITORS_UP		243	-0.298936	-1.33487	0.0106383	0.714845	1	1465	tags=26%, list=19%, signal=31%	1.33487
REACTOME_RNA_POLYMERASE_I_TRANSCRIPTION_INITIATION		27	-0.432439	-1.33399	0.113684	0.714518	1	1417	tags=48%, list=18%, signal=59%	1.33399
GINESTIER_BREAST_CANCER_ZNF217_AMPLIFIED_DN		195	-0.314627	-1.33381	0.0220884	0.71124	1	1867	tags=34%, list=24%, signal=44%	1.33381
ZHU_CMV_8_HR_DN		18	-0.48709	-1.33257	0.124473	0.71265	1	2140	tags=50%, list=27%, signal=69%	1.33257
REACTOME_PROCESSING_OF_CAPPED_INTRONLESS_PRE_MRNA		23	-0.456877	-1.33219	0.1125	0.710302	1	1457	tags=30%, list=19%, signal=37%	1.33219
PID_SMAD2_3NUCLEAR_PATHWAY		31	-0.430083	-1.33153	0.105691	0.709169	1	1986	tags=45%, list=25%, signal=60%	1.33153
BROWNE_INTERFERON_RESPONSIVE_GENES		18	-0.476729	-1.33152	0.114719	0.705261	1	1735	tags=50%, list=22%, signal=64%	1.33152
BENPORATH_CYCLING_GENES		291	-0.295816	-1.33019	0.00428265	0.707034	1	1550	tags=27%, list=20%, signal=32%	1.33019
REACTOME_REGULATION_OF_MRNA_STABILITY_BY_PROTEINS_THAT_BIND_AU_RICH_ELEMENTS		66	-0.361922	-1.32719	0.0567951	0.7163	1	1452	tags=32%, list=19%, signal=39%	1.32719
BURTON_ADIPOGENESIS_7		30	-0.426911	-1.32629	0.0965092	0.716482	1	1237	tags=30%, list=16%, signal=36%	1.32629
DING_LUNG_CANCER_EXPRESSION_BY_COPY_NUMBER		68	-0.364371	-1.32615	0.0593047	0.713188	1	1442	tags=29%, list=18%, signal=36%	1.32615
VALK_AML_CLUSTER_6		16	-0.502474	-1.32609	0.127572	0.709564	1	1398	tags=44%, list=18%, signal=53%	1.32609
HUMMEL_BURKITTS_LYMPHOMA_UP		21	-0.45555	-1.32501	0.125541	0.710573	1	1697	tags=38%, list=22%, signal=49%	1.32501
REACTOME_REGULATION_OF_MECP2_EXPRESSION_AND_ACTIVITY		18	-0.482664	-1.32292	0.115226	0.715825	1	1389	tags=33%, list=18%, signal=40%	1.32292
MASSARWEH_TAMOXIFEN_RESISTANCE_DN		102	-0.334903	-1.32187	0.0530612	0.716666	1	1465	tags=30%, list=19%, signal=37%	1.32187
MIKKELSEN_IPS_ICP_WITH_H3K4ME3_AND_H327ME3		33	-0.414386	-1.32104	0.0974659	0.716607	1	1042	tags=24%, list=13%, signal=28%	1.32104
HUTTMANN_B_CLL_POOR_SURVIVAL_DN		25	-0.443586	-1.32067	0.12426	0.714532	1	860	tags=28%, list=11%, signal=31%	1.32067
MANNE_COVID19_NONICU_VS_HEALTHY_DONOR_PLATELETS_DN		74	-0.359696	-1.31935	0.0658683	0.716623	1	1381	tags=34%, list=18%, signal=41%	1.31935
KHETCHOUMIAN_TRIM24_TARGETS_UP		21	-0.456128	-1.31903	0.131799	0.714314	1	1597	tags=38%, list=20%, signal=48%	1.31903
BROWNE_HCMV_INFECTION_12HR_UP		50	-0.377715	-1.31521	0.0991735	0.727155	1	966	tags=20%, list=12%, signal=23%	1.31521
WP_ENDOPLASMIC_RETICULUM_STRESS_RESPONSE_IN_CORONAVIRUS_INFECTION		24	-0.450412	-1.31516	0.106776	0.72364	1	1196	tags=33%, list=15%, signal=39%	1.31516
PID_INTEGRIN_A4B1_PATHWAY		22	-0.461661	-1.31472	0.136	0.721846	1	813	tags=18%, list=10%, signal=20%	1.31472
REACTOME_NUCLEAR_ENVELOPE_BREAKDOWN		41	-0.395014	-1.31423	0.0896686	0.720379	1	1802	tags=41%, list=23%, signal=54%	1.31423
BRUNO_HEMATOPOIESIS		30	-0.421322	-1.30977	0.122244	0.736001	1	510	tags=17%, list=7%, signal=18%	1.30977
MARTORIATI_MDM4_TARGETS_NEUROEPITHELIUM_DN		82	-0.344609	-1.30885	0.0392927	0.736138	1	1106	tags=21%, list=14%, signal=24%	1.30885
REACTOME_INTERFERON_SIGNALING		83	-0.341685	-1.30802	0.0506073	0.736185	1	1781	tags=30%, list=23%, signal=39%	1.30802
BECKER_TAMOXIFEN_RESISTANCE_UP		20	-0.454763	-1.30557	0.12766	0.743489	1	1522	tags=25%, list=20%, signal=31%	1.30557
SCHUETZ_BREAST_CANCER_DUCTAL_INVASIVE_DN		29	-0.425512	-1.30547	0.111765	0.74018	1	2294	tags=48%, list=29%, signal=68%	1.30547
SHEPARD_BMYB_TARGETS		22	-0.452928	-1.3043	0.144554	0.741762	1	1491	tags=41%, list=19%, signal=50%	1.3043
MARSON_BOUND_BY_E2F4_UNSTIMULATED		313	-0.287588	-1.30275	0.0202247	0.744576	1	1480	tags=25%, list=19%, signal=30%	1.30275
NIKOLSKY_BREAST_CANCER_7Q21_Q22_AMPLICON		33	-0.409012	-1.29912	0.123667	0.757419	1	1766	tags=30%, list=23%, signal=39%	1.29912
MARTINEZ_TP53_TARGETS_DN		267	-0.294347	-1.29885	0.0106383	0.75498	1	1874	tags=31%, list=24%, signal=39%	1.29885
MOREAUX_B_LYMPHOCYTE_MATURATION_BY_TACI_DN		52	-0.365868	-1.29856	0.0965795	0.752769	1	821	tags=23%, list=11%, signal=26%	1.29856
MILI_PSEUDOPODIA_HAPTOTAXIS_DN		377	-0.281805	-1.29854	0.00617284	0.74926	1	956	tags=16%, list=12%, signal=18%	1.29854
MARTIN_INTERACT_WITH_HDAC		20	-0.452331	-1.29813	0.143443	0.747546	1	1786	tags=45%, list=23%, signal=58%	1.29813
BANDRES_RESPONSE_TO_CARMUSTIN_WITHOUT_MGMT_48HR_DN		16	-0.489679	-1.29803	0.140496	0.744439	1	73	tags=13%, list=1%, signal=13%	1.29803
HOLLEMAN_PREDNISOLONE_RESISTANCE_B_ALL_UP		16	-0.487063	-1.29741	0.154455	0.74356	1	937	tags=25%, list=12%, signal=28%	1.29741
FOSTER_TOLERANT_MACROPHAGE_UP		57	-0.361141	-1.29641	0.0841889	0.744432	1	822	tags=21%, list=11%, signal=23%	1.29641
IWANAGA_CARCINOGENESIS_BY_KRAS_UP		79	-0.34257	-1.29265	0.0881148	0.758089	1	1086	tags=24%, list=14%, signal=28%	1.29265
REACTOME_TRANSLATION		242	-0.292136	-1.29108	0.0336134	0.761574	1	1971	tags=37%, list=25%, signal=48%	1.29108
ROPERO_HDAC2_TARGETS		42	-0.383282	-1.28891	0.120763	0.767675	1	502	tags=17%, list=6%, signal=18%	1.28891
STEIN_ESRRA_TARGETS_DN		51	-0.367892	-1.28759	0.0948081	0.770065	1	745	tags=22%, list=10%, signal=24%	1.28759
VERRECCHIA_DELAYED_RESPONSE_TO_TGFB1		20	-0.458892	-1.28677	0.138614	0.77003	1	1203	tags=30%, list=15%, signal=35%	1.28677
SHAFFER_IRF4_TARGETS_IN_ACTIVATED_DENDRITIC_CELL		34	-0.403798	-1.28513	0.109162	0.773452	1	1550	tags=44%, list=20%, signal=55%	1.28513
KAUFFMANN_DNA_REPAIR_GENES		100	-0.331115	-1.28475	0.0750988	0.771674	1	1739	tags=35%, list=22%, signal=44%	1.28475
NIKOLSKY_BREAST_CANCER_8P12_P11_AMPLICON		22	-0.438066	-1.28312	0.130693	0.775281	1	1418	tags=32%, list=18%, signal=39%	1.28312
THUM_SYSTOLIC_HEART_FAILURE_DN		107	-0.320139	-1.28229	0.0638298	0.775599	1	1408	tags=21%, list=18%, signal=26%	1.28229
UEDA_CENTRAL_CLOCK		48	-0.37319	-1.28104	0.105906	0.777633	1	1039	tags=27%, list=13%, signal=31%	1.28104
SCHAEFFER_PROSTATE_DEVELOPMENT_6HR_DN		280	-0.284583	-1.27959	0.02537	0.78054	1	1452	tags=23%, list=19%, signal=27%	1.27959
REACTOME_CHOLESTEROL_BIOSYNTHESIS		22	-0.448874	-1.27954	0.153518	0.77725	1	1236	tags=27%, list=16%, signal=32%	1.27954
BILANGES_RAPAMYCIN_SENSITIVE_GENES		26	-0.421736	-1.27889	0.150905	0.776644	1	2103	tags=50%, list=27%, signal=68%	1.27889
BROWNE_HCMV_INFECTION_10HR_DN		28	-0.416247	-1.27884	0.148	0.773403	1	790	tags=25%, list=10%, signal=28%	1.27884
STARK_PREFRONTAL_CORTEX_22Q11_DELETION_UP		139	-0.306663	-1.27791	0.046748	0.774028	1	1011	tags=22%, list=13%, signal=24%	1.27791
SHIPP_DLBCL_VS_FOLLICULAR_LYMPHOMA_DN		15	-0.482182	-1.27613	0.180467	0.778626	1	326	tags=20%, list=4%, signal=21%	1.27613
WP_PRADERWILLI_AND_ANGELMAN_SYNDROME		20	-0.452987	-1.2737	0.139216	0.786432	1	569	tags=25%, list=7%, signal=27%	1.2737
DIRMEIER_LMP1_RESPONSE_LATE_UP		30	-0.409024	-1.27329	0.144814	0.784818	1	2180	tags=47%, list=28%, signal=65%	1.27329
JEPSEN_SMRT_TARGETS		21	-0.44945	-1.27234	0.131148	0.785821	1	982	tags=29%, list=13%, signal=33%	1.27234
FERREIRA_EWINGS_SARCOMA_UNSTABLE_VS_STABLE_DN		45	-0.371349	-1.2722	0.121094	0.783051	1	1098	tags=20%, list=14%, signal=23%	1.2722
MARTINEZ_RB1_TARGETS_DN		247	-0.287723	-1.27187	0.0276134	0.781118	1	1275	tags=21%, list=16%, signal=24%	1.27187
HU_GENOTOXIN_ACTION_DIRECT_VS_INDIRECT_24HR		27	-0.418145	-1.27144	0.159664	0.779533	1	446	tags=15%, list=6%, signal=16%	1.27144
WP_PPAR_SIGNALING_PATHWAY		33	-0.40027	-1.27104	0.136929	0.778015	1	943	tags=24%, list=12%, signal=27%	1.27104
FOSTER_TOLERANT_MACROPHAGE_DN		167	-0.301333	-1.27017	0.0436508	0.778686	1	1784	tags=35%, list=23%, signal=45%	1.27017
REACTOME_SUMOYLATION_OF_CHROMATIN_ORGANIZATION_PROTEINS		41	-0.389474	-1.27	0.128968	0.776153	1	1629	tags=37%, list=21%, signal=46%	1.27
LUCAS_HNF4A_TARGETS_UP		26	-0.416994	-1.26818	0.14405	0.781055	1	1783	tags=38%, list=23%, signal=50%	1.26818
WAKABAYASHI_ADIPOGENESIS_PPARG_RXRA_BOUND_36HR		84	-0.332269	-1.26775	0.0776699	0.779633	1	1324	tags=25%, list=17%, signal=30%	1.26775
BLANCO_MELO_COVID19_BRONCHIAL_EPITHELIAL_CELLS_SARS_COV_2_INFECTION_DN		19	-0.450487	-1.26726	0.172	0.778399	1	823	tags=26%, list=11%, signal=29%	1.26726
WHITEFORD_PEDIATRIC_CANCER_MARKERS		43	-0.372172	-1.26717	0.128544	0.7756	1	1018	tags=23%, list=13%, signal=27%	1.26717
CASORELLI_ACUTE_PROMYELOCYTIC_LEUKEMIA_DN		395	-0.273462	-1.26526	0.0170576	0.781158	1	1514	tags=23%, list=19%, signal=27%	1.26526
BRIDEAU_IMPRINTED_GENES		29	-0.414232	-1.26378	0.140039	0.784378	1	1599	tags=34%, list=21%, signal=43%	1.26378
JAZAG_TGFB1_SIGNALING_UP		48	-0.360695	-1.26334	0.122622	0.783148	1	1816	tags=48%, list=23%, signal=62%	1.26334
NIKOLSKY_BREAST_CANCER_7P22_AMPLICON		16	-0.479714	-1.26239	0.173152	0.784353	1	1616	tags=50%, list=21%, signal=63%	1.26239
[truncated: 1,267 more rows]

## Sheet: WT over K1918X cortex
NAME	GS DETAILS	SIZE	ES	NES	NOM p-val	FDR q-val	FWER p-val	RANK AT MAX	LEADING EDGE	NES (Mut/WT)
REACTOME_MITOCHONDRIAL_TRANSLATION	Details ...	89	0.592089	2.28924	0	0.000841307	0.001	1439	tags=52%, list=18%, signal=63%	-2.28924
SLEBOS_HEAD_AND_NECK_CANCER_WITH_HPV_UP	Details ...	27	0.695605	2.12752	0	0.0166227	0.039	1200	tags=52%, list=15%, signal=61%	-2.12752
BIOCARTA_PROTEASOME_PATHWAY	Details ...	18	0.722918	2.0052	0.0019685	0.0970611	0.288	1595	tags=72%, list=20%, signal=91%	-2.0052
REACTOME_COOPERATION_OF_PREFOLDIN_AND_TRIC_CCT_IN_ACTIN_AND_TUBULIN_FOLDING	Details ...	15	0.767509	1.98194	0	0.0997242	0.376	823	tags=60%, list=11%, signal=67%	-1.98194
REACTOME_THE_ROLE_OF_GTSE1_IN_G2_M_PROGRESSION_AFTER_G2_CHECKPOINT	Details ...	45	0.521491	1.80346	0.00380228	0.681307	0.984	1115	tags=33%, list=14%, signal=39%	-1.80346
REACTOME_TNFR2_NON_CANONICAL_NF_KB_PATHWAY	Details ...	49	0.525555	1.79142	0.00189036	0.640532	0.99	1354	tags=35%, list=17%, signal=42%	-1.79142
REACTOME_DECTIN_1_MEDIATED_NONCANONICAL_NF_KB_SIGNALING	Details ...	47	0.524699	1.78618	0	0.579523	0.993	1354	tags=36%, list=17%, signal=44%	-1.78618
REACTOME_MITOTIC_G1_PHASE_AND_G1_S_TRANSITION	Details ...	70	0.478474	1.78201	0	0.529453	0.994	1374	tags=36%, list=18%, signal=43%	-1.78201
REACTOME_FCERI_MEDIATED_NF_KB_ACTIVATION	Details ...	60	0.491902	1.77884	0.00198413	0.485343	0.994	1115	tags=30%, list=14%, signal=35%	-1.77884
REACTOME_MAPK6_MAPK4_SIGNALING	Details ...	52	0.502481	1.7694	0.0078125	0.477737	0.997	1115	tags=27%, list=14%, signal=31%	-1.7694
CHNG_MULTIPLE_MYELOMA_HYPERPLOID_DN	Details ...	24	0.594862	1.76247	0.00803213	0.462362	0.997	943	tags=33%, list=12%, signal=38%	-1.76247
REACTOME_RNA_POLYMERASE_III_TRANSCRIPTION_INITIATION_FROM_TYPE_1_PROMOTER	Details ...	18	0.63849	1.76126	0.00575816	0.428687	0.997	497	tags=28%, list=6%, signal=30%	-1.76126
REACTOME_PROTEIN_FOLDING	Details ...	54	0.499192	1.74373	0	0.464784	0.999	1819	tags=43%, list=23%, signal=55%	-1.74373
CHESLER_BRAIN_HIGHEST_EXPRESSION	Details ...	25	0.573779	1.70849	0.00595238	0.595844	1	1097	tags=32%, list=14%, signal=37%	-1.70849
REACTOME_ASSOCIATION_OF_TRIC_CCT_WITH_TARGET_PROTEINS_DURING_BIOSYNTHESIS	Details ...	23	0.577732	1.7074	0.0114943	0.561254	1	1120	tags=43%, list=14%, signal=51%	-1.7074
REACTOME_TRANSLATION	Details ...	242	0.385764	1.70606	0	0.533198	1	1750	tags=37%, list=22%, signal=46%	-1.70606
SABATES_COLORECTAL_ADENOMA_UP	Details ...	28	0.541128	1.69953	0.0132827	0.533242	1	1059	tags=29%, list=14%, signal=33%	-1.69953
REACTOME_DEGRADATION_OF_GLI1_BY_THE_PROTEASOME	Details ...	45	0.498118	1.69848	0.00957854	0.507617	1	1115	tags=29%, list=14%, signal=34%	-1.69848
REACTOME_DNA_REPLICATION_PRE_INITIATION	Details ...	60	0.468042	1.69579	0	0.492273	1	1200	tags=28%, list=15%, signal=33%	-1.69579
REACTOME_METABOLISM_OF_POLYAMINES	Details ...	44	0.497946	1.68821	0.0075188	0.500039	1	1115	tags=32%, list=14%, signal=37%	-1.68821
REACTOME_NEGATIVE_REGULATION_OF_NOTCH4_SIGNALING		42	0.494019	1.68538	0.00757576	0.488554	1	1115	tags=29%, list=14%, signal=33%	-1.68538
WP_GLYCOGEN_SYNTHESIS_AND_DEGRADATION		22	0.583484	1.68276	0.0160966	0.478076	1	2746	tags=77%, list=35%, signal=119%	-1.68276
REACTOME_DOWNSTREAM_SIGNALING_EVENTS_OF_B_CELL_RECEPTOR_BCR		58	0.467511	1.67708	0	0.480632	1	1115	tags=28%, list=14%, signal=32%	-1.67708
CHOW_RASSF1_TARGETS_DN		18	0.614058	1.67503	0.0134615	0.468749	1	132	tags=22%, list=2%, signal=23%	-1.67503
REACTOME_REGULATION_OF_RAS_BY_GAPS		53	0.47684	1.67341	0.00203666	0.456224	1	1445	tags=34%, list=19%, signal=41%	-1.67341
HOFFMANN_IMMATURE_TO_MATURE_B_LYMPHOCYTE_UP		16	0.602251	1.66163	0.0184843	0.485408	1	914	tags=38%, list=12%, signal=42%	-1.66163
REACTOME_SCF_BETA_TRCP_MEDIATED_DEGRADATION_OF_EMI1		43	0.487659	1.66089	0.0115385	0.470436	1	1115	tags=30%, list=14%, signal=35%	-1.66089
REACTOME_ORC1_REMOVAL_FROM_CHROMATIN		46	0.486959	1.65654	0.00793651	0.47127	1	1115	tags=30%, list=14%, signal=35%	-1.65654
REACTOME_INTERLEUKIN_1_SIGNALING		76	0.445047	1.65457	0.00379507	0.461906	1	1390	tags=32%, list=18%, signal=38%	-1.65457
BASSO_B_LYMPHOCYTE_NETWORK		88	0.42738	1.64781	0.00190476	0.472113	1	1940	tags=48%, list=25%, signal=63%	-1.64781
REACTOME_COPII_MEDIATED_VESICLE_TRANSPORT		46	0.478294	1.63592	0.00384615	0.503962	1	1072	tags=24%, list=14%, signal=28%	-1.63592
JIANG_AGING_HYPOTHALAMUS_UP		31	0.524264	1.63374	0.00965251	0.497135	1	1750	tags=52%, list=22%, signal=66%	-1.63374
REACTOME_DNA_REPLICATION		73	0.437185	1.62732	0.00790514	0.507191	1	1200	tags=27%, list=15%, signal=32%	-1.62732
REACTOME_CARGO_CONCENTRATION_IN_THE_ER		18	0.595992	1.62529	0.0130719	0.500894	1	506	tags=28%, list=6%, signal=30%	-1.62529
WP_MICRORNAS_IN_CARDIOMYOCYTE_HYPERTROPHY		46	0.476196	1.62408	0.0135397	0.491051	1	868	tags=26%, list=11%, signal=29%	-1.62408
REACTOME_DEGRADATION_OF_AXIN		43	0.479615	1.61995	0.0105263	0.492583	1	1115	tags=30%, list=14%, signal=35%	-1.61995
REACTOME_SWITCHING_OF_ORIGINS_TO_A_POST_REPLICATIVE_STATE		58	0.455338	1.61877	0.00610998	0.483611	1	1115	tags=28%, list=14%, signal=32%	-1.61877
REACTOME_KERATAN_SULFATE_KERATIN_METABOLISM		16	0.595748	1.61705	0.0396975	0.477517	1	962	tags=31%, list=12%, signal=36%	-1.61705
WP_METABOLIC_REPROGRAMMING_IN_COLON_CANCER		35	0.508658	1.6144	0.016632	0.475607	1	2099	tags=54%, list=27%, signal=74%	-1.6144
REACTOME_RUNX1_REGULATES_TRANSCRIPTION_OF_GENES_INVOLVED_IN_DIFFERENTIATION_OF_HSCS		49	0.470532	1.61331	0.0134357	0.467606	1	1115	tags=27%, list=14%, signal=31%	-1.61331
REACTOME_DEGRADATION_OF_DVL		43	0.469132	1.61322	0.00828157	0.45662	1	1445	tags=33%, list=19%, signal=40%	-1.61322
SMID_BREAST_CANCER_RELAPSE_IN_BONE_DN		110	0.402709	1.61036	0.00379507	0.456082	1	835	tags=20%, list=11%, signal=22%	-1.61036
REACTOME_AUF1_HNRNP_D0_BINDS_AND_DESTABILIZES_MRNA		44	0.472658	1.60688	0.0134357	0.458513	1	1115	tags=27%, list=14%, signal=32%	-1.60688
REACTOME_REGULATION_OF_RUNX3_EXPRESSION_AND_ACTIVITY		42	0.480559	1.60203	0.0181159	0.466175	1	1354	tags=31%, list=17%, signal=37%	-1.60203
REACTOME_TNFR1_INDUCED_NFKAPPAB_SIGNALING_PATHWAY		17	0.58372	1.6011	0.0385439	0.459207	1	539	tags=29%, list=7%, signal=32%	-1.6011
REACTOME_SYNTHESIS_OF_DNA		71	0.426755	1.59081	0.0077821	0.486173	1	1200	tags=27%, list=15%, signal=31%	-1.59081
SOGA_COLORECTAL_CANCER_MYC_UP		57	0.446901	1.59004	0.0111524	0.478866	1	1909	tags=44%, list=24%, signal=58%	-1.59004
REACTOME_CROSS_PRESENTATION_OF_SOLUBLE_EXOGENOUS_ANTIGENS_ENDOSOMES		42	0.470365	1.58504	0.0251938	0.487388	1	1115	tags=29%, list=14%, signal=33%	-1.58504
REACTOME_S_PHASE		91	0.40777	1.58182	0.00371058	0.48911	1	1374	tags=29%, list=18%, signal=34%	-1.58182
SHIPP_DLBCL_VS_FOLLICULAR_LYMPHOMA_UP		27	0.51744	1.57984	0.026616	0.487158	1	1451	tags=37%, list=19%, signal=45%	-1.57984
KEGG_AMINO_SUGAR_AND_NUCLEOTIDE_SUGAR_METABOLISM		32	0.503209	1.5769	0.012939	0.48907	1	1909	tags=47%, list=24%, signal=62%	-1.5769
REACTOME_ENDOSOMAL_SORTING_COMPLEX_REQUIRED_FOR_TRANSPORT_ESCRT		23	0.549794	1.57356	0.0199203	0.491775	1	921	tags=35%, list=12%, signal=39%	-1.57356
REACTOME_STABILIZATION_OF_P53		42	0.461307	1.57185	0.00562852	0.488911	1	1115	tags=29%, list=14%, signal=33%	-1.57185
LI_DCP2_BOUND_MRNA		71	0.426418	1.57045	0.00743494	0.48519	1	1020	tags=25%, list=13%, signal=29%	-1.57045
REACTOME_RECOGNITION_OF_DNA_DAMAGE_BY_PCNA_CONTAINING_REPLICATION_COMPLEX		16	0.586953	1.56962	0.0349794	0.479395	1	1613	tags=50%, list=21%, signal=63%	-1.56962
REACTOME_BBSOME_MEDIATED_CARGO_TARGETING_TO_CILIUM		16	0.595277	1.56948	0.0402414	0.471234	1	967	tags=44%, list=12%, signal=50%	-1.56948
LEIN_OLIGODENDROCYTE_MARKERS		51	0.455089	1.5693	0.0134875	0.46361	1	255	tags=16%, list=3%, signal=16%	-1.5693
REACTOME_CYCLIN_A_CDK2_ASSOCIATED_EVENTS_AT_S_PHASE_ENTRY		56	0.440093	1.56571	0.0169811	0.467721	1	1374	tags=32%, list=18%, signal=39%	-1.56571
REACTOME_PCP_CE_PATHWAY		61	0.433317	1.56246	0.00803213	0.47095	1	1532	tags=33%, list=20%, signal=40%	-1.56246
REACTOME_REGULATION_OF_RUNX2_EXPRESSION_AND_ACTIVITY		51	0.441821	1.56178	0.0217822	0.465833	1	1115	tags=25%, list=14%, signal=30%	-1.56178
REACTOME_RAF_ACTIVATION		17	0.581071	1.56084	0.0362903	0.46136	1	2639	tags=76%, list=34%, signal=115%	-1.56084
REACTOME_RAB_GEFS_EXCHANGE_GTP_FOR_GDP_ON_RABS		49	0.456778	1.55648	0.00556586	0.469073	1	1853	tags=41%, list=24%, signal=53%	-1.55648
REACTOME_NEDDYLATION		148	0.374145	1.55546	0	0.464939	1	1551	tags=32%, list=20%, signal=40%	-1.55546
KAYO_CALORIE_RESTRICTION_MUSCLE_DN		50	0.4417	1.55313	0.015444	0.465638	1	897	tags=26%, list=12%, signal=29%	-1.55313
REACTOME_DEGRADATION_OF_BETA_CATENIN_BY_THE_DESTRUCTION_COMPLEX		58	0.439191	1.55068	0.015444	0.466871	1	1354	tags=29%, list=17%, signal=35%	-1.55068
ZHOU_TNF_SIGNALING_30MIN		26	0.504871	1.54647	0.037182	0.474308	1	457	tags=19%, list=6%, signal=20%	-1.54647
ZHANG_RESPONSE_TO_CANTHARIDIN_DN		46	0.461507	1.54637	0.0245283	0.467545	1	1335	tags=33%, list=17%, signal=39%	-1.54637
REACTOME_RECYCLING_PATHWAY_OF_L1		18	0.580909	1.54253	0.0347648	0.473952	1	1532	tags=50%, list=20%, signal=62%	-1.54253
WP_3Q29_COPY_NUMBER_VARIATION_SYNDROME		22	0.542036	1.54171	0.0321361	0.470022	1	788	tags=27%, list=10%, signal=30%	-1.54171
REACTOME_HEDGEHOG_ON_STATE		54	0.438417	1.53882	0.0187617	0.473629	1	1445	tags=31%, list=19%, signal=38%	-1.53882
KEGG_VIBRIO_CHOLERAE_INFECTION		28	0.50251	1.53794	0.0341556	0.469925	1	1732	tags=43%, list=22%, signal=55%	-1.53794
REACTOME_REGULATION_OF_PTEN_STABILITY_AND_ACTIVITY		54	0.435821	1.53663	0.0189394	0.467758	1	1945	tags=41%, list=25%, signal=54%	-1.53663
MARTINEZ_RESPONSE_TO_TRABECTEDIN_UP		38	0.470887	1.53535	0.0376238	0.46575	1	948	tags=26%, list=12%, signal=30%	-1.53535
REACTOME_TRANSPORT_OF_VITAMINS_NUCLEOSIDES_AND_RELATED_MOLECULES		16	0.571331	1.53511	0.0383838	0.460139	1	484	tags=19%, list=6%, signal=20%	-1.53511
KEGG_DNA_REPLICATION		15	0.573067	1.53409	0.040856	0.457409	1	336	tags=27%, list=4%, signal=28%	-1.53409
REACTOME_G2_M_CHECKPOINTS		67	0.421234	1.52996	0.00567108	0.464865	1	1354	tags=30%, list=17%, signal=36%	-1.52996
ELVIDGE_HIF1A_AND_HIF2A_TARGETS_UP		26	0.508029	1.52614	0.0270793	0.471285	1	619	tags=35%, list=8%, signal=37%	-1.52614
KEGG_PROTEASOME		38	0.461303	1.52322	0.0338346	0.475363	1	1115	tags=32%, list=14%, signal=37%	-1.52322
KEGG_TRYPTOPHAN_METABOLISM		20	0.538588	1.52138	0.0489642	0.476039	1	872	tags=30%, list=11%, signal=34%	-1.52138
REACTOME_SIGNALING_BY_WNT_IN_CANCER		16	0.565305	1.52077	0.0524109	0.472235	1	2758	tags=81%, list=35%, signal=125%	-1.52077
REACTOME_SCF_SKP2_MEDIATED_DEGRADATION_OF_P27_P21		44	0.452054	1.52034	0.0338983	0.467842	1	1115	tags=30%, list=14%, signal=34%	-1.52034
REACTOME_APC_C_MEDIATED_DEGRADATION_OF_CELL_CYCLE_PROTEINS		58	0.42935	1.51434	0.0185874	0.482858	1	1354	tags=31%, list=17%, signal=37%	-1.51434
REACTOME_DEFECTIVE_CFTR_CAUSES_CYSTIC_FIBROSIS		46	0.445214	1.5123	0.0221774	0.483498	1	1140	tags=28%, list=15%, signal=33%	-1.5123
REACTOME_ASYMMETRIC_LOCALIZATION_OF_PCP_PROTEINS		47	0.440929	1.51158	0.0243902	0.479928	1	1354	tags=30%, list=17%, signal=36%	-1.51158
ZHAN_MULTIPLE_MYELOMA_CD2_DN		27	0.502788	1.50882	0.0492424	0.483663	1	1674	tags=44%, list=21%, signal=56%	-1.50882
WP_PROTEASOME_DEGRADATION		45	0.439797	1.50585	0.0270793	0.488169	1	1945	tags=38%, list=25%, signal=50%	-1.50585
REACTOME_PEROXISOMAL_LIPID_METABOLISM		20	0.527171	1.50552	0.046332	0.483558	1	1073	tags=40%, list=14%, signal=46%	-1.50552
RHODES_UNDIFFERENTIATED_CANCER		23	0.518478	1.50144	0.0482625	0.491277	1	800	tags=35%, list=10%, signal=39%	-1.50144
LE_EGR2_TARGETS_DN		63	0.414128	1.50101	0.0191939	0.487157	1	655	tags=21%, list=8%, signal=22%	-1.50101
DARWICHE_PAPILLOMA_RISK_LOW_UP		78	0.401999	1.50022	0.0169173	0.48442	1	662	tags=22%, list=8%, signal=24%	-1.50022
REACTOME_HOST_INTERACTIONS_OF_HIV_FACTORS		101	0.37697	1.49327	0.00760456	0.503068	1	1739	tags=34%, list=22%, signal=43%	-1.49327
HEIDENBLAD_AMPLICON_12P11_12_UP		21	0.505531	1.49234	0.0622407	0.50074	1	774	tags=29%, list=10%, signal=32%	-1.49234
REACTOME_BIOSYNTHESIS_OF_THE_N_GLYCAN_PRECURSOR_DOLICHOL_LIPID_LINKED_OLIGOSACCHARIDE_LLO_AND_TRANSFER_TO_A_NASCENT_PROTEIN		37	0.459006	1.48954	0.0301318	0.504825	1	1875	tags=41%, list=24%, signal=53%	-1.48954
PEART_HDAC_PROLIFERATION_CLUSTER_UP		21	0.524999	1.48802	0.0494297	0.504883	1	1582	tags=43%, list=20%, signal=54%	-1.48802
REACTOME_RAB_REGULATION_OF_TRAFFICKING		73	0.399501	1.48608	0.0251938	0.506115	1	1890	tags=36%, list=24%, signal=47%	-1.48608
REACTOME_ROS_AND_RNS_PRODUCTION_IN_PHAGOCYTES		16	0.557957	1.48592	0.0589474	0.501457	1	1508	tags=44%, list=19%, signal=54%	-1.48592
REACTOME_FACTORS_INVOLVED_IN_MEGAKARYOCYTE_DEVELOPMENT_AND_PLATELET_PRODUCTION		46	0.429433	1.48038	0.0174081	0.515632	1	1820	tags=37%, list=23%, signal=48%	-1.48038
REACTOME_AMINO_ACIDS_REGULATE_MTORC1		37	0.453188	1.47951	0.0425926	0.513471	1	1508	tags=41%, list=19%, signal=50%	-1.47951
BOYAULT_LIVER_CANCER_SUBCLASS_G3_UP		129	0.36622	1.47913	0.00961539	0.509786	1	1959	tags=40%, list=25%, signal=53%	-1.47913
REACTOME_CLEC7A_DECTIN_1_SIGNALING		70	0.39234	1.4784	0.0113422	0.506985	1	1181	tags=27%, list=15%, signal=32%	-1.4784
REACTOME_TCR_SIGNALING		71	0.398264	1.47766	0.0272374	0.504435	1	1115	tags=23%, list=14%, signal=26%	-1.47766
REACTOME_SIGNALING_BY_NOTCH4		49	0.436972	1.47486	0.0244399	0.509375	1	1115	tags=24%, list=14%, signal=28%	-1.47486
REACTOME_EPHB_MEDIATED_FORWARD_SIGNALING		30	0.469512	1.47124	0.0426357	0.517052	1	674	tags=20%, list=9%, signal=22%	-1.47124
PID_LIS1_PATHWAY		22	0.499795	1.47117	0.0618763	0.512236	1	1417	tags=41%, list=18%, signal=50%	-1.47117
NIKOLSKY_BREAST_CANCER_8Q23_Q24_AMPLICON		67	0.40061	1.46411	0.0243902	0.531895	1	899	tags=22%, list=12%, signal=25%	-1.46411
REACTOME_MAPK_FAMILY_SIGNALING_CASCADES		159	0.355398	1.46395	0.00566038	0.527544	1	1445	tags=28%, list=19%, signal=33%	-1.46395
REACTOME_COPI_INDEPENDENT_GOLGI_TO_ER_RETROGRADE_TRAFFIC		27	0.478636	1.46295	0.0504854	0.526056	1	1332	tags=33%, list=17%, signal=40%	-1.46295
FRIDMAN_IMMORTALIZATION_DN		16	0.546924	1.46239	0.0696799	0.523081	1	1659	tags=38%, list=21%, signal=48%	-1.46239
REACTOME_APC_C_CDH1_MEDIATED_DEGRADATION_OF_CDC20_AND_OTHER_APC_C_CDH1_TARGETED_PROTEINS_IN_LATE_MITOSIS_EARLY_G1		54	0.406669	1.46236	0.0254902	0.518385	1	1354	tags=30%, list=17%, signal=36%	-1.46236
REACTOME_RNA_POLYMERASE_III_TRANSCRIPTION		24	0.496781	1.46194	0.0569745	0.515224	1	497	tags=21%, list=6%, signal=22%	-1.46194
RAHMAN_TP53_TARGETS_PHOSPHORYLATED		16	0.553349	1.46095	0.061144	0.513953	1	1115	tags=38%, list=14%, signal=44%	-1.46095
REACTOME_CARGO_TRAFFICKING_TO_THE_PERICILIARY_MEMBRANE		34	0.451252	1.46064	0.0487805	0.510564	1	1762	tags=38%, list=23%, signal=49%	-1.46064
HOFMANN_CELL_LYMPHOMA_UP		15	0.561379	1.45986	0.0609756	0.508692	1	1274	tags=53%, list=16%, signal=64%	-1.45986
REACTOME_GLYCOSPHINGOLIPID_METABOLISM		28	0.476837	1.45509	0.0528302	0.519562	1	843	tags=21%, list=11%, signal=24%	-1.45509
REACTOME_ENERGY_DEPENDENT_REGULATION_OF_MTOR_BY_LKB1_AMPK		21	0.500245	1.45474	0.0688976	0.516116	1	2236	tags=52%, list=29%, signal=73%	-1.45474
REACTOME_INTERLEUKIN_1_FAMILY_SIGNALING		88	0.381951	1.45298	0.0185567	0.517372	1	1390	tags=28%, list=18%, signal=34%	-1.45298
JOHANSSON_BRAIN_CANCER_EARLY_VS_LATE_DN		33	0.451345	1.45084	0.0604839	0.5201	1	1262	tags=24%, list=16%, signal=29%	-1.45084
SANSOM_APC_TARGETS_REQUIRE_MYC		120	0.356949	1.44959	0.00537634	0.520076	1	1265	tags=28%, list=16%, signal=32%	-1.44959
PID_EPHB_FWD_PATHWAY		22	0.496832	1.44677	0.0609037	0.525203	1	1175	tags=23%, list=15%, signal=27%	-1.44677
REACTOME_DNA_DAMAGE_BYPASS		27	0.474481	1.44336	0.0535373	0.532704	1	2036	tags=41%, list=26%, signal=55%	-1.44336
REACTOME_MHC_CLASS_II_ANTIGEN_PRESENTATION		56	0.406324	1.44036	0.0449438	0.538839	1	1569	tags=30%, list=20%, signal=38%	-1.44036
BIOCARTA_AT1R_PATHWAY		15	0.546597	1.43981	0.0797665	0.536351	1	191	tags=13%, list=2%, signal=14%	-1.43981
CHIANG_LIVER_CANCER_SUBCLASS_UNANNOTATED_DN		125	0.356851	1.43815	0.00582524	0.537554	1	1653	tags=32%, list=21%, signal=40%	-1.43815
REACTOME_TAK1_DEPENDENT_IKK_AND_NF_KAPPA_B_ACTIVATION		22	0.487126	1.43568	0.0780952	0.54164	1	1330	tags=41%, list=17%, signal=49%	-1.43568
REACTOME_SYNTHESIS_OF_SUBSTRATES_IN_N_GLYCAN_BIOSYTHESIS		32	0.455869	1.43536	0.0512295	0.538482	1	1875	tags=41%, list=24%, signal=53%	-1.43536
GUO_TARGETS_OF_IRS1_AND_IRS2		54	0.406202	1.43351	0.0335821	0.540738	1	1514	tags=33%, list=19%, signal=41%	-1.43351
REACTOME_ASPARAGINE_N_LINKED_GLYCOSYLATION		167	0.338825	1.43345	0.00566038	0.536622	1	2004	tags=32%, list=26%, signal=42%	-1.43345
ELLWOOD_MYC_TARGETS_DN		25	0.483379	1.43243	0.0597015	0.536001	1	103	tags=8%, list=1%, signal=8%	-1.43243
REACTOME_GLYCOSAMINOGLYCAN_METABOLISM		55	0.403311	1.43218	0.0368217	0.532706	1	1940	tags=38%, list=25%, signal=50%	-1.43218
SMITH_TERT_TARGETS_UP		78	0.376869	1.43191	0.0213592	0.529455	1	1279	tags=27%, list=16%, signal=32%	-1.43191
REACTOME_INTERLEUKIN_17_SIGNALING		31	0.460344	1.43075	0.06639	0.529296	1	2283	tags=52%, list=29%, signal=73%	-1.43075
REACTOME_HEDGEHOG_LIGAND_BIOGENESIS		49	0.410777	1.4306	0.038961	0.525805	1	1140	tags=27%, list=15%, signal=31%	-1.4306
REACTOME_LYSOSOME_VESICLE_BIOGENESIS		27	0.472969	1.42888	0.065666	0.52777	1	1025	tags=30%, list=13%, signal=34%	-1.42888
REACTOME_SARS_COV_2_MODULATES_HOST_TRANSLATION_MACHINERY		44	0.422557	1.42861	0.0414201	0.524673	1	2217	tags=45%, list=28%, signal=63%	-1.42861
REACTOME_RNA_POLYMERASE_III_TRANSCRIPTION_INITIATION_FROM_TYPE_3_PROMOTER		17	0.527426	1.42623	0.0770791	0.529351	1	497	tags=24%, list=6%, signal=25%	-1.42623
AMIT_SERUM_RESPONSE_480_MCF10A		15	0.544558	1.42565	0.0912863	0.527312	1	1328	tags=47%, list=17%, signal=56%	-1.42565
WP_TARGET_OF_RAPAMYCIN_SIGNALING		23	0.485669	1.42521	0.0592734	0.524917	1	2236	tags=52%, list=29%, signal=73%	-1.42521
REACTOME_TP53_REGULATES_METABOLIC_GENES		55	0.406252	1.42485	0.0371094	0.522438	1	2236	tags=47%, list=29%, signal=66%	-1.42485
KEGG_GLYCEROPHOSPHOLIPID_METABOLISM		47	0.418061	1.42404	0.0435644	0.521274	1	1113	tags=28%, list=14%, signal=32%	-1.42404
ALCALAY_AML_BY_NPM1_LOCALIZATION_DN		81	0.375562	1.42361	0.0311284	0.518949	1	1129	tags=22%, list=14%, signal=26%	-1.42361
REACTOME_GLYCEROPHOSPHOLIPID_BIOSYNTHESIS		73	0.376785	1.41743	0.034749	0.536187	1	1087	tags=21%, list=14%, signal=24%	-1.41743
REACTOME_RAB_GERANYLGERANYLATION		21	0.49312	1.41692	0.0783505	0.534078	1	1720	tags=48%, list=22%, signal=61%	-1.41692
REACTOME_MEMBRANE_TRAFFICKING		390	0.305386	1.41509	0	0.536576	1	1570	tags=25%, list=20%, signal=30%	-1.41509
HEIDENBLAD_AMPLIFIED_IN_PANCREATIC_CANCER		31	0.449282	1.41487	0.0557692	0.533615	1	1804	tags=42%, list=23%, signal=54%	-1.41487
REACTOME_HEDGEHOG_OFF_STATE		71	0.383576	1.40796	0.024952	0.553493	1	1440	tags=31%, list=18%, signal=38%	-1.40796
PELLICCIOTTA_HDAC_IN_ANTIGEN_PRESENTATION_DN		34	0.427576	1.40745	0.0485437	0.551639	1	1355	tags=38%, list=17%, signal=46%	-1.40745
REACTOME_NUCLEAR_EVENTS_MEDIATED_BY_NFE2L2		57	0.395244	1.4067	0.0393996	0.550445	1	1115	tags=23%, list=14%, signal=26%	-1.4067
REACTOME_TRANSCRIPTIONAL_REGULATION_BY_RUNX2		66	0.37936	1.40395	0.0363289	0.556393	1	1354	tags=27%, list=17%, signal=33%	-1.40395
REACTOME_G1_S_DNA_DAMAGE_CHECKPOINTS		45	0.414592	1.40393	0.0486815	0.55271	1	1115	tags=27%, list=14%, signal=31%	-1.40393
BOYAULT_LIVER_CANCER_SUBCLASS_G6_UP		34	0.433953	1.40286	0.0643939	0.552506	1	1795	tags=44%, list=23%, signal=57%	-1.40286
WP_G1_TO_S_CELL_CYCLE_CONTROL		16	0.53018	1.40279	0.09375	0.549079	1	336	tags=25%, list=4%, signal=26%	-1.40279
COATES_MACROPHAGE_M1_VS_M2_UP		47	0.414954	1.40224	0.059387	0.54745	1	945	tags=19%, list=12%, signal=22%	-1.40224
PID_ARF_3PATHWAY		15	0.529947	1.40118	0.0731225	0.547463	1	1532	tags=40%, list=20%, signal=50%	-1.40118
REACTOME_MITOTIC_G2_G2_M_PHASES		106	0.352065	1.39898	0.0245747	0.551462	1	1148	tags=27%, list=15%, signal=32%	-1.39898
PID_ATF2_PATHWAY		18	0.509155	1.39876	0.086444	0.548692	1	1445	tags=50%, list=19%, signal=61%	-1.39876
CHENG_RESPONSE_TO_NICKEL_ACETATE		22	0.484373	1.3983	0.0838323	0.546687	1	1583	tags=36%, list=20%, signal=45%	-1.3983
KEGG_AMINOACYL_TRNA_BIOSYNTHESIS		21	0.473731	1.39716	0.0778689	0.546972	1	1089	tags=38%, list=14%, signal=44%	-1.39716
WONG_PROTEASOME_GENE_MODULE		39	0.427436	1.39656	0.0637523	0.545525	1	1354	tags=33%, list=17%, signal=40%	-1.39656
VANHARANTA_UTERINE_FIBROID_WITH_7Q_DELETION_DN		24	0.46503	1.39602	0.0801603	0.543748	1	675	tags=29%, list=9%, signal=32%	-1.39602
REACTOME_COOPERATION_OF_PDCL_PHLP1_AND_TRIC_CCT_IN_G_PROTEIN_BETA_FOLDING		24	0.471135	1.39355	0.0867993	0.548999	1	1819	tags=46%, list=23%, signal=60%	-1.39355
REACTOME_GLOBAL_GENOME_NUCLEOTIDE_EXCISION_REPAIR_GG_NER		53	0.387551	1.3924	0.0417495	0.549488	1	1613	tags=34%, list=21%, signal=43%	-1.3924
REACTOME_CARGO_RECOGNITION_FOR_CLATHRIN_MEDIATED_ENDOCYTOSIS		62	0.38971	1.39215	0.0469314	0.546817	1	2061	tags=40%, list=26%, signal=54%	-1.39215
GAZDA_DIAMOND_BLACKFAN_ANEMIA_MYELOID_DN		23	0.469062	1.39203	0.083004	0.543885	1	1097	tags=30%, list=14%, signal=35%	-1.39203
SCHLOSSER_MYC_TARGETS_AND_SERUM_RESPONSE_DN		36	0.429139	1.39174	0.0696325	0.54152	1	1879	tags=39%, list=24%, signal=51%	-1.39174
WEI_MYCN_TARGETS_WITH_E_BOX		488	0.295	1.39057	0.00177936	0.542182	1	1615	tags=27%, list=21%, signal=31%	-1.39057
REACTOME_CELLULAR_RESPONSE_TO_HYPOXIA		51	0.397007	1.38894	0.0660194	0.544551	1	1115	tags=25%, list=14%, signal=30%	-1.38894
GENTILE_UV_RESPONSE_CLUSTER_D4		31	0.447448	1.38838	0.0791075	0.543199	1	697	tags=19%, list=9%, signal=21%	-1.38838
COLDREN_GEFITINIB_RESISTANCE_DN		66	0.376692	1.38527	0.0580271	0.550323	1	393	tags=14%, list=5%, signal=14%	-1.38527
WP_PHOTODYNAMIC_THERAPYINDUCED_AP1_SURVIVAL_SIGNALING		16	0.530513	1.37983	0.109731	0.565275	1	1982	tags=50%, list=25%, signal=67%	-1.37983
REACTOME_TRANSFERRIN_ENDOCYTOSIS_AND_RECYCLING		16	0.530087	1.37885	0.101833	0.565246	1	1508	tags=44%, list=19%, signal=54%	-1.37885
REACTOME_FC_EPSILON_RECEPTOR_FCERI_SIGNALING		85	0.359727	1.37617	0.0287908	0.571469	1	1115	tags=22%, list=14%, signal=26%	-1.37617
REACTOME_REGULATION_OF_TP53_ACTIVITY_THROUGH_PHOSPHORYLATION		39	0.411402	1.37447	0.0925197	0.574113	1	2236	tags=49%, list=29%, signal=68%	-1.37447
ROYLANCE_BREAST_CANCER_16Q_COPY_NUMBER_UP		31	0.440663	1.36949	0.090566	0.588434	1	1655	tags=52%, list=21%, signal=65%	-1.36949
ROSS_LEUKEMIA_WITH_MLL_FUSIONS		46	0.39978	1.36927	0.0688976	0.585921	1	1378	tags=26%, list=18%, signal=31%	-1.36927
KIM_ALL_DISORDERS_CALB1_CORR_UP		402	0.293518	1.36881	0	0.584214	1	1684	tags=27%, list=22%, signal=32%	-1.36881
JAATINEN_HEMATOPOIETIC_STEM_CELL_UP		141	0.329505	1.36705	0.0189036	0.587126	1	1191	tags=22%, list=15%, signal=25%	-1.36705
WP_METAPATHWAY_BIOTRANSFORMATION_PHASE_I_AND_II		47	0.400507	1.36405	0.0702128	0.594418	1	1974	tags=40%, list=25%, signal=54%	-1.36405
REACTOME_CYCLIN_D_ASSOCIATED_EVENTS_IN_G1		17	0.513681	1.36002	0.107505	0.605951	1	1274	tags=47%, list=16%, signal=56%	-1.36002
REACTOME_ABC_FAMILY_PROTEINS_MEDIATED_TRANSPORT		71	0.366041	1.35982	0.0552268	0.603225	1	1354	tags=25%, list=17%, signal=30%	-1.35982
WP_TCELL_ACTIVATION_SARSCOV2		34	0.422595	1.35825	0.0854369	0.605613	1	2319	tags=53%, list=30%, signal=75%	-1.35825
VANOEVELEN_MYOGENESIS_SIN3A_TARGETS		123	0.335963	1.35476	0.0344828	0.615643	1	1726	tags=30%, list=22%, signal=38%	-1.35476
BARRIER_COLON_CANCER_RECURRENCE_UP		26	0.454463	1.35416	0.0889749	0.614274	1	1718	tags=46%, list=22%, signal=59%	-1.35416
REACTOME_TOLL_LIKE_RECEPTOR_9_TLR9_CASCADE		53	0.383978	1.35146	0.0617761	0.620581	1	2153	tags=43%, list=28%, signal=60%	-1.35146
KEGG_NICOTINATE_AND_NICOTINAMIDE_METABOLISM		15	0.511436	1.35095	0.143713	0.619129	1	1363	tags=40%, list=17%, signal=48%	-1.35095
KEGG_PURINE_METABOLISM		99	0.347405	1.35051	0.0398482	0.617363	1	2156	tags=40%, list=28%, signal=55%	-1.35051
GAUSSMANN_MLL_AF4_FUSION_TARGETS_D_UP		16	0.503143	1.3487	0.103175	0.62059	1	1433	tags=31%, list=18%, signal=38%	-1.3487
WP_CILIARY_LANDSCAPE		144	0.323101	1.34734	0.0313112	0.622304	1	1490	tags=28%, list=19%, signal=35%	-1.34734
ONGUSAHA_TP53_TARGETS		16	0.497472	1.34524	0.131274	0.626658	1	832	tags=31%, list=11%, signal=35%	-1.34524
WP_GLYCOLYSIS_AND_GLUCONEOGENESIS		22	0.468913	1.34516	0.117988	0.623605	1	2076	tags=45%, list=27%, signal=62%	-1.34516
BOYAULT_LIVER_CANCER_SUBCLASS_G23_UP		23	0.442062	1.34259	0.112676	0.629995	1	1382	tags=30%, list=18%, signal=37%	-1.34259
WANG_ADIPOGENIC_GENES_REPRESSED_BY_SIRT1		18	0.480848	1.34214	0.109848	0.628364	1	1909	tags=44%, list=24%, signal=59%	-1.34214
PID_AURORA_B_PATHWAY		17	0.493403	1.33989	0.134269	0.633563	1	1445	tags=35%, list=19%, signal=43%	-1.33989
ELVIDGE_HYPOXIA_BY_DMOG_DN		35	0.423266	1.33928	0.100402	0.632722	1	556	tags=26%, list=7%, signal=28%	-1.33928
REACTOME_FORMATION_OF_INCISION_COMPLEX_IN_GG_NER		25	0.446184	1.33813	0.109705	0.6337	1	1598	tags=36%, list=20%, signal=45%	-1.33813
TIEN_INTESTINE_PROBIOTICS_24HR_UP		349	0.294402	1.33795	0.00733945	0.63111	1	1654	tags=26%, list=21%, signal=32%	-1.33795
REACTOME_EPH_EPHRIN_SIGNALING		54	0.381789	1.33674	0.0796964	0.632305	1	1532	tags=26%, list=20%, signal=32%	-1.33674
PELLICCIOTTA_HDAC_IN_ANTIGEN_PRESENTATION_UP		50	0.387465	1.33563	0.073922	0.633128	1	901	tags=20%, list=12%, signal=22%	-1.33563
REACTOME_TRANSCRIPTIONAL_REGULATION_BY_THE_AP_2_TFAP2_FAMILY_OF_TRANSCRIPTION_FACTORS		17	0.490248	1.33424	0.132937	0.635131	1	1136	tags=24%, list=15%, signal=27%	-1.33424
KEGG_N_GLYCAN_BIOSYNTHESIS		26	0.440363	1.33366	0.101727	0.6341	1	1501	tags=31%, list=19%, signal=38%	-1.33366
REACTOME_ANTIGEN_PROCESSING_UBIQUITINATION_PROTEASOME_DEGRADATION		192	0.311781	1.33295	0.0314685	0.633454	1	1597	tags=28%, list=20%, signal=34%	-1.33295
REACTOME_ER_TO_GOLGI_ANTEROGRADE_TRANSPORT		93	0.34381	1.33201	0.0408922	0.633521	1	1097	tags=18%, list=14%, signal=21%	-1.33201
TCGA_GLIOBLASTOMA_COPY_NUMBER_UP		37	0.406308	1.33129	0.0901639	0.633138	1	1362	tags=27%, list=17%, signal=33%	-1.33129
YAO_TEMPORAL_RESPONSE_TO_PROGESTERONE_CLUSTER_13		125	0.330189	1.33097	0.0386847	0.631158	1	1854	tags=34%, list=24%, signal=44%	-1.33097
REACTOME_C_TYPE_LECTIN_RECEPTORS_CLRS		78	0.351061	1.33057	0.0614525	0.629461	1	1181	tags=24%, list=15%, signal=28%	-1.33057
RODRIGUES_THYROID_CARCINOMA_POORLY_DIFFERENTIATED_UP		364	0.287398	1.32733	0.0132325	0.638194	1	1799	tags=30%, list=23%, signal=37%	-1.32733
ELVIDGE_HIF1A_TARGETS_UP		44	0.390489	1.32716	0.0788955	0.635705	1	556	tags=23%, list=7%, signal=24%	-1.32716
GENTILE_UV_RESPONSE_CLUSTER_D6		17	0.482369	1.32452	0.132296	0.64239	1	781	tags=24%, list=10%, signal=26%	-1.32452
REACTOME_SIGNALING_BY_HEDGEHOG		90	0.346569	1.32142	0.0537037	0.65095	1	1445	tags=29%, list=19%, signal=35%	-1.32142
LEIN_MIDBRAIN_MARKERS		38	0.405238	1.3206	0.104283	0.650838	1	902	tags=24%, list=12%, signal=27%	-1.3206
WANG_ESOPHAGUS_CANCER_VS_NORMAL_DN		58	0.369847	1.31794	0.0836431	0.657875	1	1540	tags=28%, list=20%, signal=34%	-1.31794
NIKOLSKY_BREAST_CANCER_8Q12_Q22_AMPLICON		62	0.368313	1.31668	0.0788462	0.65947	1	768	tags=23%, list=10%, signal=25%	-1.31668
ACEVEDO_LIVER_TUMOR_VS_NORMAL_ADJACENT_TISSUE_UP		497	0.27937	1.3162	0.00348432	0.658213	1	1667	tags=27%, list=21%, signal=32%	-1.3162
LINDGREN_BLADDER_CANCER_CLUSTER_3_DN		114	0.33123	1.31617	0.047259	0.655267	1	1400	tags=21%, list=18%, signal=25%	-1.31617
NAM_FXYD5_TARGETS_DN		15	0.494679	1.3159	0.161702	0.653199	1	827	tags=33%, list=11%, signal=37%	-1.3159
REACTOME_METABOLISM_OF_VITAMINS_AND_COFACTORS		96	0.335041	1.31459	0.0511811	0.654992	1	2174	tags=41%, list=28%, signal=56%	-1.31459
BIOCARTA_RACCYCD_PATHWAY		15	0.505443	1.31396	0.141975	0.654341	1	1274	tags=33%, list=16%, signal=40%	-1.31396
WILLIAMS_ESR2_TARGETS_UP		15	0.492145	1.31327	0.143133	0.654101	1	1063	tags=33%, list=14%, signal=39%	-1.31327
REACTOME_TRANSPORT_TO_THE_GOLGI_AND_SUBSEQUENT_MODIFICATION		104	0.329983	1.31225	0.0434783	0.655031	1	1097	tags=17%, list=14%, signal=20%	-1.31225
WP_ALZHEIMERS_DISEASE		141	0.317232	1.31215	0.0455408	0.652356	1	1115	tags=21%, list=14%, signal=24%	-1.31215
REACTOME_CD28_CO_STIMULATION		16	0.491727	1.31188	0.137097	0.650425	1	2110	tags=50%, list=27%, signal=68%	-1.31188
ACEVEDO_NORMAL_TISSUE_ADJACENT_TO_LIVER_TUMOR_UP		97	0.338293	1.30981	0.0638298	0.655065	1	1383	tags=26%, list=18%, signal=31%	-1.30981
MOREAUX_MULTIPLE_MYELOMA_BY_TACI_DN		114	0.326951	1.30949	0.0611855	0.653207	1	1347	tags=26%, list=17%, signal=31%	-1.30949
WP_AMINO_ACID_METABOLISM		58	0.362471	1.30939	0.0740741	0.650616	1	1338	tags=24%, list=17%, signal=29%	-1.30939
KEGG_CYTOSOLIC_DNA_SENSING_PATHWAY		22	0.44553	1.30929	0.127451	0.648124	1	450	tags=18%, list=6%, signal=19%	-1.30929
MOOTHA_GLUCONEOGENESIS		16	0.508082	1.30668	0.137652	0.654672	1	1909	tags=50%, list=24%, signal=66%	-1.30668
WP_CILIOPATHIES		75	0.348633	1.30451	0.0707269	0.659752	1	1609	tags=33%, list=21%, signal=42%	-1.30451
WANG_CISPLATIN_RESPONSE_AND_XPC_DN		107	0.328692	1.30359	0.0600707	0.660258	1	1461	tags=24%, list=19%, signal=29%	-1.30359
LEE_LIVER_CANCER_E2F1_UP		26	0.432389	1.30221	0.104208	0.662493	1	763	tags=27%, list=10%, signal=30%	-1.30221
REACTOME_VESICLE_MEDIATED_TRANSPORT		407	0.2805	1.3022	0.0141343	0.659619	1	1570	tags=25%, list=20%, signal=29%	-1.3022
KEGG_INSULIN_SIGNALING_PATHWAY		68	0.350876	1.30215	0.094162	0.656904	1	2236	tags=47%, list=29%, signal=65%	-1.30215
FIGUEROA_AML_METHYLATION_CLUSTER_2_UP		21	0.454722	1.30208	0.125	0.654308	1	1747	tags=38%, list=22%, signal=49%	-1.30208
WP_ENERGY_METABOLISM		22	0.444806	1.30174	0.12069	0.652845	1	2257	tags=55%, list=29%, signal=77%	-1.30174
WP_ALZHEIMERS_DISEASE_AND_MIRNA_EFFECTS		141	0.317232	1.30114	0.0569853	0.652382	1	1115	tags=21%, list=14%, signal=24%	-1.30114
IVANOVA_HEMATOPOIESIS_INTERMEDIATE_PROGENITOR		91	0.342367	1.30018	0.079922	0.653091	1	1705	tags=33%, list=22%, signal=42%	-1.30018
KEGG_BUTANOATE_METABOLISM		25	0.436325	1.29874	0.12381	0.655481	1	2451	tags=48%, list=31%, signal=70%	-1.29874
REACTOME_TELOMERE_C_STRAND_LAGGING_STRAND_SYNTHESIS		19	0.475786	1.29855	0.134809	0.653356	1	2352	tags=53%, list=30%, signal=75%	-1.29855
AMIT_EGF_RESPONSE_120_MCF10A		17	0.478455	1.29611	0.150763	0.659665	1	832	tags=29%, list=11%, signal=33%	-1.29611
PID_TRKR_PATHWAY		40	0.397776	1.29441	0.105159	0.663082	1	1173	tags=25%, list=15%, signal=29%	-1.29441
GRYDER_PAX3FOXO1_TOP_ENHANCERS		271	0.289514	1.29383	0.0175781	0.66259	1	1589	tags=24%, list=20%, signal=30%	-1.29383
REACTOME_CHOLESTEROL_BIOSYNTHESIS		22	0.455849	1.2921	0.153693	0.665937	1	864	tags=27%, list=11%, signal=31%	-1.2921
KEGG_CYSTEINE_AND_METHIONINE_METABOLISM		19	0.458191	1.29158	0.161417	0.665227	1	1315	tags=32%, list=17%, signal=38%	-1.29158
WP_PARKINSONS_DISEASE_PATHWAY		22	0.439482	1.29072	0.144762	0.665578	1	2163	tags=59%, list=28%, signal=82%	-1.29072
KEGG_PORPHYRIN_AND_CHLOROPHYLL_METABOLISM		18	0.47388	1.29023	0.159763	0.664633	1	1341	tags=50%, list=17%, signal=60%	-1.29023
KEGG_ALANINE_ASPARTATE_AND_GLUTAMATE_METABOLISM		22	0.442697	1.29006	0.140562	0.662466	1	2620	tags=45%, list=34%, signal=68%	-1.29006
TENEDINI_MEGAKARYOCYTE_MARKERS		16	0.48188	1.28957	0.157895	0.661493	1	556	tags=38%, list=7%, signal=40%	-1.28957
NICK_RESPONSE_TO_PROC_TREATMENT_DN		16	0.476291	1.28768	0.166337	0.665757	1	1707	tags=44%, list=22%, signal=56%	-1.28768
REACTOME_TRNA_AMINOACYLATION		23	0.440476	1.28431	0.172285	0.676025	1	1089	tags=30%, list=14%, signal=35%	-1.28431
MEISSNER_BRAIN_HCP_WITH_H3K27ME3		22	0.439803	1.28167	0.134269	0.68303	1	1326	tags=36%, list=17%, signal=44%	-1.28167
FIRESTEIN_PROLIFERATION		86	0.340378	1.28127	0.0755467	0.681859	1	1644	tags=28%, list=21%, signal=35%	-1.28127
REACTOME_METABOLISM_OF_NUCLEOTIDES		68	0.348439	1.28094	0.0949495	0.680325	1	2539	tags=50%, list=33%, signal=73%	-1.28094
SESTO_RESPONSE_TO_UV_C0		59	0.35799	1.27796	0.105906	0.689168	1	1416	tags=22%, list=18%, signal=27%	-1.27796
REACTOME_SYNTHESIS_OF_BILE_ACIDS_AND_BILE_SALTS		18	0.46652	1.27782	0.149312	0.686917	1	1228	tags=33%, list=16%, signal=39%	-1.27782
LEE_AGING_MUSCLE_UP		15	0.4821	1.27717	0.184261	0.686717	1	1497	tags=33%, list=19%, signal=41%	-1.27717
WP_DYRK1A		33	0.400661	1.27353	0.143141	0.698088	1	1481	tags=33%, list=19%, signal=41%	-1.27353
AMIT_SERUM_RESPONSE_120_MCF10A		22	0.441383	1.27191	0.151163	0.701759	1	1442	tags=41%, list=18%, signal=50%	-1.27191
MOOTHA_MITOCHONDRIA		328	0.279477	1.27167	0.0255009	0.699859	1	1470	tags=23%, list=19%, signal=28%	-1.27167
REACTOME_DEATH_RECEPTOR_SIGNALLING		82	0.333504	1.27112	0.0917603	0.699353	1	2054	tags=38%, list=26%, signal=51%	-1.27112
GAUSSMANN_MLL_AF4_FUSION_TARGETS_F_DN		15	0.495776	1.27032	0.175649	0.69963	1	2063	tags=47%, list=26%, signal=63%	-1.27032
SHEPARD_CRASH_AND_BURN_MUTANT_UP		99	0.327815	1.26915	0.10241	0.701389	1	591	tags=11%, list=8%, signal=12%	-1.26915
REACTOME_NEGATIVE_REGULATION_OF_MAPK_PATHWAY		16	0.482337	1.26644	0.171375	0.709456	1	2856	tags=81%, list=37%, signal=128%	-1.26644
LIN_NPAS4_TARGETS_UP		100	0.321994	1.26636	0.082243	0.707053	1	1877	tags=30%, list=24%, signal=39%	-1.26636
REACTOME_KINESINS		15	0.479774	1.26636	0.158491	0.704364	1	1318	tags=40%, list=17%, signal=48%	-1.26636
REACTOME_TRANSCRIPTIONAL_REGULATION_BY_RUNX3		51	0.358149	1.26444	0.12	0.709377	1	1354	tags=25%, list=17%, signal=31%	-1.26444
KYNG_RESPONSE_TO_H2O2_VIA_ERCC6_UP		22	0.432633	1.25919	0.180747	0.726995	1	1037	tags=23%, list=13%, signal=26%	-1.25919
HOLLERN_EMT_BREAST_TUMOR_DN		25	0.416645	1.25857	0.148221	0.726832	1	1183	tags=28%, list=15%, signal=33%	-1.25857
REACTOME_METABOLISM_OF_CARBOHYDRATES		154	0.301543	1.2573	0.0642857	0.729253	1	1940	tags=34%, list=25%, signal=44%	-1.2573
REACTOME_CELL_CYCLE_CHECKPOINTS		127	0.309094	1.25673	0.0797665	0.728793	1	1686	tags=29%, list=22%, signal=37%	-1.25673
VECCHI_GASTRIC_CANCER_ADVANCED_VS_EARLY_DN		46	0.375412	1.25616	0.157282	0.728185	1	861	tags=24%, list=11%, signal=27%	-1.25616
MODY_HIPPOCAMPUS_NEONATAL		23	0.44059	1.25534	0.161905	0.728671	1	833	tags=30%, list=11%, signal=34%	-1.25534
REACTOME_SYNTHESIS_OF_PC		19	0.447773	1.2549	0.185629	0.727697	1	892	tags=21%, list=11%, signal=24%	-1.2549
ROSS_AML_WITH_MLL_FUSIONS		45	0.365564	1.25455	0.130769	0.72638	1	1418	tags=29%, list=18%, signal=35%	-1.25455
BOYLAN_MULTIPLE_MYELOMA_D_DN		41	0.372527	1.2534	0.130682	0.728216	1	712	tags=15%, list=9%, signal=16%	-1.2534
WP_CHOLESTEROL_SYNTHESIS_DISORDERS		15	0.4763	1.25226	0.194332	0.729953	1	379	tags=20%, list=5%, signal=21%	-1.25226
REACTOME_INTERCONVERSION_OF_NUCLEOTIDE_DI_AND_TRIPHOSPHATES		18	0.450645	1.25171	0.166023	0.729417	1	2743	tags=61%, list=35%, signal=94%	-1.25171
REACTOME_EXTENSION_OF_TELOMERES		29	0.414862	1.24965	0.168986	0.734702	1	2572	tags=48%, list=33%, signal=72%	-1.24965
KEGG_ENDOCYTOSIS		106	0.311877	1.24844	0.105461	0.736942	1	1820	tags=31%, list=23%, signal=40%	-1.24844
KEGG_UBIQUITIN_MEDIATED_PROTEOLYSIS		88	0.328958	1.24807	0.133205	0.73582	1	1705	tags=31%, list=22%, signal=39%	-1.24807
ROESSLER_LIVER_CANCER_METASTASIS_UP		56	0.352893	1.24792	0.132576	0.733753	1	1358	tags=27%, list=17%, signal=32%	-1.24792
WP_NEUROGENESIS_REGULATION_IN_THE_OLFACTORY_EPITHELIUM		31	0.396746	1.24778	0.176699	0.731736	1	1991	tags=35%, list=26%, signal=47%	-1.24778
REACTOME_TCF_DEPENDENT_SIGNALING_IN_RESPONSE_TO_WNT		90	0.321889	1.24777	0.0955166	0.729181	1	1445	tags=26%, list=19%, signal=31%	-1.24777
RICKMAN_HEAD_AND_NECK_CANCER_C		23	0.427139	1.24775	0.188641	0.726625	1	833	tags=22%, list=11%, signal=24%	-1.24775
REACTOME_UCH_PROTEINASES		59	0.349389	1.2461	0.138122	0.730327	1	1419	tags=29%, list=18%, signal=35%	-1.2461
REACTOME_CELLULAR_RESPONSE_TO_CHEMICAL_STRESS		128	0.304035	1.24559	0.0735294	0.72968	1	1117	tags=20%, list=14%, signal=22%	-1.24559
SIG_CD40PATHWAYMAP		18	0.453447	1.24533	0.178926	0.728117	1	2856	tags=61%, list=37%, signal=96%	-1.24533
SERVITJA_ISLET_HNF1A_TARGETS_DN		34	0.39014	1.24471	0.164773	0.727955	1	2113	tags=38%, list=27%, signal=52%	-1.24471
MOLENAAR_TARGETS_OF_CCND1_AND_CDK4_DN		15	0.475538	1.24465	0.182903	0.725634	1	75	tags=13%, list=1%, signal=13%	-1.24465
REACTOME_PTEN_REGULATION		94	0.318135	1.24438	0.102467	0.72422	1	1958	tags=34%, list=25%, signal=45%	-1.24438
REACTOME_SIGNALING_BY_WNT		144	0.299657	1.24282	0.0852273	0.727656	1	1847	tags=29%, list=24%, signal=38%	-1.24282
EPPERT_HSC_R		46	0.363965	1.24241	0.163065	0.726683	1	1759	tags=35%, list=23%, signal=45%	-1.24241
REACTOME_SEPARATION_OF_SISTER_CHROMATIDS		105	0.315217	1.24076	0.10775	0.730643	1	1417	tags=27%, list=18%, signal=32%	-1.24076
REACTOME_BIOLOGICAL_OXIDATIONS		82	0.325644	1.23825	0.124248	0.737723	1	1304	tags=24%, list=17%, signal=29%	-1.23825
KEGG_LYSOSOME		74	0.327066	1.23786	0.140655	0.736763	1	1590	tags=31%, list=20%, signal=39%	-1.23786
KEGG_EPITHELIAL_CELL_SIGNALING_IN_HELICOBACTER_PYLORI_INFECTION		41	0.376272	1.23698	0.157993	0.737824	1	2078	tags=39%, list=27%, signal=53%	-1.23698
PID_AURORA_A_PATHWAY		15	0.461807	1.23692	0.176817	0.735599	1	1307	tags=27%, list=17%, signal=32%	-1.23692
REACTOME_ABC_TRANSPORTER_DISORDERS		56	0.347584	1.23547	0.114815	0.738771	1	1354	tags=29%, list=17%, signal=34%	-1.23547
DARWICHE_SKIN_TUMOR_PROMOTER_UP		69	0.334973	1.23534	0.120482	0.736803	1	1313	tags=25%, list=17%, signal=29%	-1.23534
REACTOME_PLASMA_LIPOPROTEIN_CLEARANCE		19	0.449402	1.23354	0.177165	0.741403	1	1991	tags=53%, list=26%, signal=70%	-1.23354
REACTOME_GAMMA_CARBOXYLATION_HYPUSINE_FORMATION_AND_ARYLSULFATASE_ACTIVATION		19	0.443462	1.23323	0.182857	0.740202	1	1225	tags=26%, list=16%, signal=31%	-1.23323
REACTOME_KEAP1_NFE2L2_PATHWAY		72	0.335087	1.22847	0.143689	0.756308	1	1808	tags=29%, list=23%, signal=38%	-1.22847
REACTOME_GOLGI_ASSOCIATED_VESICLE_BIOGENESIS		41	0.376795	1.22806	0.172084	0.755486	1	1986	tags=41%, list=25%, signal=55%	-1.22806
VECCHI_GASTRIC_CANCER_EARLY_UP		182	0.288655	1.22769	0.0695971	0.754439	1	809	tags=16%, list=10%, signal=18%	-1.22769
FRASOR_RESPONSE_TO_SERM_OR_FULVESTRANT_DN		17	0.445276	1.22768	0.192	0.751972	1	1419	tags=29%, list=18%, signal=36%	-1.22768
WP_MONOAMINE_TRANSPORT		20	0.434493	1.227	0.194118	0.752141	1	1165	tags=35%, list=15%, signal=41%	-1.227
BENPORATH_PROLIFERATION		64	0.330912	1.22427	0.129943	0.760458	1	1288	tags=28%, list=17%, signal=33%	-1.22427
HILLION_HMGA1B_TARGETS		49	0.352138	1.22407	0.135397	0.758845	1	2048	tags=39%, list=26%, signal=52%	-1.22407
GAUSSMANN_MLL_AF4_FUSION_TARGETS_G_UP		90	0.31818	1.22375	0.123845	0.757613	1	1586	tags=26%, list=20%, signal=32%	-1.22375
HOFFMANN_PRE_BI_TO_LARGE_PRE_BII_LYMPHOCYTE_DN		34	0.379325	1.22221	0.181467	0.76124	1	614	tags=15%, list=8%, signal=16%	-1.22221
OUILLETTE_CLL_13Q14_DELETION_DN		23	0.422548	1.21897	0.198783	0.771776	1	1001	tags=30%, list=13%, signal=35%	-1.21897
ROESSLER_LIVER_CANCER_METASTASIS_DN		33	0.380474	1.21772	0.175	0.774316	1	828	tags=24%, list=11%, signal=27%	-1.21772
BRUECKNER_TARGETS_OF_MIRLET7A3_UP		57	0.339231	1.21743	0.180043	0.772985	1	1319	tags=30%, list=17%, signal=36%	-1.21743
SHAFFER_IRF4_TARGETS_IN_ACTIVATED_B_LYMPHOCYTE		45	0.360062	1.21579	0.143984	0.777136	1	1863	tags=40%, list=24%, signal=52%	-1.21579
ZWANG_EGF_INTERVAL_UP		23	0.422399	1.21559	0.188433	0.775472	1	1749	tags=48%, list=22%, signal=61%	-1.21559
WP_INTRAFLAGELLAR_TRANSPORT_PROTEINS_BINDING_TO_DYNEIN		18	0.449266	1.21497	0.208251	0.775565	1	788	tags=28%, list=10%, signal=31%	-1.21497
TOMLINS_PROSTATE_CANCER_UP		28	0.39012	1.21441	0.195358	0.775349	1	2600	tags=43%, list=33%, signal=64%	-1.21441
REACTOME_BETA_CATENIN_INDEPENDENT_WNT_SIGNALING		88	0.315385	1.21247	0.143984	0.780383	1	1945	tags=31%, list=25%, signal=40%	-1.21247
MISIAK_ANAPLASTIC_THYROID_CARCINOMA_UP		15	0.456856	1.21082	0.239604	0.784581	1	684	tags=27%, list=9%, signal=29%	-1.21082
SMID_BREAST_CANCER_BASAL_UP		224	0.277663	1.21064	0.0769231	0.782898	1	838	tags=17%, list=11%, signal=18%	-1.21064
SMIRNOV_CIRCULATING_ENDOTHELIOCYTES_IN_CANCER_UP		56	0.335941	1.20934	0.160305	0.785899	1	1225	tags=27%, list=16%, signal=32%	-1.20934
REACTOME_MYD88_INDEPENDENT_TLR4_CASCADE		55	0.341563	1.20919	0.182815	0.783948	1	1943	tags=36%, list=25%, signal=48%	-1.20919
ZHANG_RESPONSE_TO_IKK_INHIBITOR_AND_TNF_UP		67	0.333048	1.20885	0.168539	0.782872	1	790	tags=18%, list=10%, signal=20%	-1.20885
KAUFFMANN_MELANOMA_RELAPSE_UP		20	0.430907	1.20879	0.214575	0.780705	1	647	tags=30%, list=8%, signal=33%	-1.20879
REACTOME_TRANSCRIPTIONAL_REGULATION_BY_TP53		196	0.280073	1.20835	0.0982318	0.779967	1	2175	tags=38%, list=28%, signal=51%	-1.20835
LIEN_BREAST_CARCINOMA_METAPLASTIC_VS_DUCTAL_UP		26	0.406846	1.20833	0.211132	0.777613	1	850	tags=27%, list=11%, signal=30%	-1.20833
HELLER_HDAC_TARGETS_DN		135	0.29445	1.20808	0.113594	0.776247	1	1461	tags=26%, list=19%, signal=31%	-1.20808
GRAHAM_CML_DIVIDING_VS_NORMAL_QUIESCENT_UP		71	0.325603	1.20796	0.154297	0.774327	1	1146	tags=25%, list=15%, signal=29%	-1.20796
SHEDDEN_LUNG_CANCER_GOOD_SURVIVAL_A12		107	0.303301	1.20778	0.118774	0.772706	1	1464	tags=29%, list=19%, signal=35%	-1.20778
REACTOME_P75_NTR_RECEPTOR_MEDIATED_SIGNALLING		56	0.333627	1.20712	0.169492	0.772934	1	2054	tags=36%, list=26%, signal=48%	-1.20712
ROSS_AML_WITH_CBFB_MYH11_FUSION		20	0.421295	1.2068	0.201597	0.771727	1	1059	tags=30%, list=14%, signal=35%	-1.2068
LEE_AGING_CEREBELLUM_DN		30	0.393329	1.20255	0.219101	0.786244	1	1043	tags=30%, list=13%, signal=34%	-1.20255
REACTOME_DETOXIFICATION_OF_REACTIVE_OXYGEN_SPECIES		24	0.409954	1.20254	0.202729	0.783913	1	470	tags=17%, list=6%, signal=18%	-1.20254
REACTOME_REGULATION_OF_TP53_ACTIVITY		72	0.328014	1.20242	0.143123	0.782053	1	2236	tags=40%, list=29%, signal=56%	-1.20242
CHIARADONNA_NEOPLASTIC_TRANSFORMATION_KRAS_CDC25_UP		28	0.398239	1.20166	0.201581	0.782832	1	2233	tags=50%, list=29%, signal=70%	-1.20166
KEGG_OXIDATIVE_PHOSPHORYLATION		74	0.323203	1.20165	0.156716	0.780507	1	1592	tags=27%, list=20%, signal=34%	-1.20165
WP_METABOLIC_REPROGRAMMING_IN_PANCREATIC_CANCER		34	0.379614	1.20125	0.197292	0.779722	1	2075	tags=41%, list=27%, signal=56%	-1.20125
REACTOME_TRNA_PROCESSING		80	0.316414	1.201	0.172211	0.778393	1	1789	tags=31%, list=23%, signal=40%	-1.201
REACTOME_PHASE_II_CONJUGATION_OF_COMPOUNDS		43	0.357527	1.20051	0.200375	0.777911	1	1980	tags=37%, list=25%, signal=50%	-1.20051
WP_NUCLEOTIDE_EXCISION_REPAIR		27	0.392521	1.19901	0.215953	0.781425	1	1613	tags=33%, list=21%, signal=42%	-1.19901
MARKEY_RB1_CHRONIC_LOF_DN		51	0.342096	1.19876	0.178082	0.780052	1	463	tags=14%, list=6%, signal=14%	-1.19876
PID_CDC42_PATHWAY		45	0.35217	1.19629	0.183206	0.787804	1	2570	tags=47%, list=33%, signal=69%	-1.19629
REACTOME_MAPK_TARGETS_NUCLEAR_EVENTS_MEDIATED_BY_MAP_KINASES		15	0.457325	1.19618	0.213462	0.785964	1	2153	tags=53%, list=28%, signal=74%	-1.19618
MANALO_HYPOXIA_DN		171	0.283559	1.19454	0.100719	0.790204	1	1301	tags=20%, list=17%, signal=24%	-1.19454
REACTOME_HIV_INFECTION		178	0.280835	1.19438	0.123862	0.788518	1	1739	tags=28%, list=22%, signal=35%	-1.19438
SONG_TARGETS_OF_IE86_CMV_PROTEIN		22	0.410961	1.19352	0.224033	0.789706	1	2030	tags=55%, list=26%, signal=74%	-1.19352
REACTOME_CLASS_I_MHC_MEDIATED_ANTIGEN_PROCESSING_PRESENTATION		233	0.270786	1.19233	0.0933573	0.792197	1	1597	tags=25%, list=20%, signal=31%	-1.19233
IVANOVSKA_MIR106B_TARGETS		48	0.347314	1.19196	0.184261	0.791416	1	1043	tags=21%, list=13%, signal=24%	-1.19196
BHATI_G2M_ARREST_BY_2METHOXYESTRADIOL_UP		48	0.348633	1.19177	0.200765	0.789944	1	839	tags=21%, list=11%, signal=23%	-1.19177
KEGG_NUCLEOTIDE_EXCISION_REPAIR		27	0.392521	1.1914	0.214712	0.789066	1	1613	tags=33%, list=21%, signal=42%	-1.1914
KEGG_GNRH_SIGNALING_PATHWAY		39	0.361551	1.18937	0.200364	0.794828	1	1910	tags=36%, list=24%, signal=47%	-1.18937
REACTOME_SYNTHESIS_OF_ACTIVE_UBIQUITIN_ROLES_OF_E1_AND_E2_ENZYMES		18	0.438909	1.18889	0.251521	0.794567	1	2650	tags=72%, list=34%, signal=109%	-1.18889
KAAB_HEART_ATRIUM_VS_VENTRICLE_DN		159	0.282476	1.18887	0.108656	0.792367	1	1389	tags=22%, list=18%, signal=26%	-1.18887
STARK_PREFRONTAL_CORTEX_22Q11_DELETION_DN		376	0.257507	1.18795	0.0580986	0.793784	1	1020	tags=18%, list=13%, signal=20%	-1.18795
MORI_MATURE_B_LYMPHOCYTE_UP		37	0.364243	1.18717	0.191806	0.79469	1	723	tags=14%, list=9%, signal=15%	-1.18717
MOOTHA_PGC		275	0.266947	1.18692	0.0940959	0.793569	1	1914	tags=33%, list=25%, signal=42%	-1.18692
NIKOLSKY_BREAST_CANCER_16P13_AMPLICON		43	0.358133	1.18496	0.214286	0.799262	1	1109	tags=26%, list=14%, signal=30%	-1.18496
DITTMER_PTHLH_TARGETS_DN		42	0.358093	1.18457	0.184959	0.798648	1	862	tags=24%, list=11%, signal=27%	-1.18457
CREIGHTON_ENDOCRINE_THERAPY_RESISTANCE_3		339	0.257336	1.18433	0.0702403	0.797434	1	1573	tags=24%, list=20%, signal=28%	-1.18433
KEGG_HISTIDINE_METABOLISM		17	0.44132	1.1842	0.251451	0.795667	1	476	tags=24%, list=6%, signal=25%	-1.1842
IBRAHIM_NRF2_UP		341	0.259561	1.18385	0.0759494	0.794889	1	1728	tags=26%, list=22%, signal=32%	-1.18385
REACTOME_METABOLISM_OF_WATER_SOLUBLE_VITAMINS_AND_COFACTORS		61	0.329233	1.18368	0.187621	0.793382	1	2534	tags=52%, list=32%, signal=77%	-1.18368
ACEVEDO_NORMAL_TISSUE_ADJACENT_TO_LIVER_TUMOR_DN		197	0.275087	1.18354	0.104364	0.791707	1	1061	tags=20%, list=14%, signal=22%	-1.18354
MATZUK_SPERMATID_DIFFERENTIATION		15	0.453854	1.1825	0.237525	0.79372	1	1314	tags=40%, list=17%, signal=48%	-1.1825
REACTOME_SIGNALING_BY_INSULIN_RECEPTOR		34	0.366021	1.18074	0.198874	0.798583	1	2268	tags=44%, list=29%, signal=62%	-1.18074
REACTOME_CILIUM_ASSEMBLY		103	0.295679	1.18065	0.154412	0.796696	1	993	tags=22%, list=13%, signal=25%	-1.18065
VERHAAK_GLIOBLASTOMA_NEURAL		79	0.311233	1.17904	0.17757	0.800758	1	1541	tags=23%, list=20%, signal=28%	-1.17904
PID_P38_MKK3_6PATHWAY		17	0.431745	1.17904	0.23301	0.798578	1	1982	tags=47%, list=25%, signal=63%	-1.17904
CHANDRAN_METASTASIS_TOP50_UP		21	0.408193	1.17835	0.245648	0.799102	1	1136	tags=29%, list=15%, signal=33%	-1.17835
GRAESSMANN_RESPONSE_TO_MC_AND_SERUM_DEPRIVATION_DN		42	0.353032	1.17829	0.2	0.797139	1	2398	tags=43%, list=31%, signal=62%	-1.17829
REACTOME_VISUAL_PHOTOTRANSDUCTION		41	0.354894	1.17814	0.229412	0.79555	1	1937	tags=44%, list=25%, signal=58%	-1.17814
KEGG_GLYCOLYSIS_GLUCONEOGENESIS		31	0.373793	1.17756	0.251894	0.795657	1	2075	tags=35%, list=27%, signal=48%	-1.17756
NOUZOVA_TRETINOIN_AND_H4_ACETYLATION		93	0.306807	1.17754	0.158824	0.793566	1	953	tags=20%, list=12%, signal=23%	-1.17754
KEGG_ARACHIDONIC_ACID_METABOLISM		19	0.420762	1.17448	0.251485	0.803623	1	1408	tags=42%, list=18%, signal=51%	-1.17448
KEGG_RNA_POLYMERASE		19	0.414264	1.17336	0.2423	0.80589	1	450	tags=16%, list=6%, signal=17%	-1.17336
BOUDOUKHA_BOUND_BY_IGF2BP2		62	0.324001	1.17209	0.20442	0.808966	1	1547	tags=34%, list=20%, signal=42%	-1.17209
WAKABAYASHI_ADIPOGENESIS_PPARG_BOUND_8D		352	0.256174	1.17079	0.101786	0.811956	1	1554	tags=26%, list=20%, signal=32%	-1.17079
WP_CYTOSOLIC_DNASENSING_PATHWAY		34	0.358393	1.17063	0.202929	0.810402	1	450	tags=15%, list=6%, signal=16%	-1.17063
KESHELAVA_MULTIPLE_DRUG_RESISTANCE		39	0.358147	1.17014	0.222222	0.810211	1	748	tags=18%, list=10%, signal=20%	-1.17014
ZHAN_MULTIPLE_MYELOMA_SUBGROUPS		19	0.418682	1.16941	0.2423	0.810909	1	2618	tags=47%, list=34%, signal=71%	-1.16941
BROWNE_HCMV_INFECTION_30MIN_DN		56	0.329281	1.16895	0.211429	0.810498	1	1483	tags=27%, list=19%, signal=33%	-1.16895
YAO_TEMPORAL_RESPONSE_TO_PROGESTERONE_CLUSTER_14		106	0.295958	1.16774	0.172862	0.813081	1	1129	tags=22%, list=14%, signal=25%	-1.16774
MOOTHA_HUMAN_MITODB_6_2002		321	0.256197	1.16724	0.0822898	0.812953	1	1470	tags=23%, list=19%, signal=27%	-1.16724
KEGG_FRUCTOSE_AND_MANNOSE_METABOLISM		20	0.408315	1.16683	0.238281	0.812518	1	1771	tags=35%, list=23%, signal=45%	-1.16683
ZWANG_EGF_PERSISTENTLY_UP		21	0.404161	1.16664	0.257485	0.811186	1	379	tags=14%, list=5%, signal=15%	-1.16664
SESTO_RESPONSE_TO_UV_C2		35	0.366497	1.16631	0.227273	0.810262	1	900	tags=26%, list=12%, signal=29%	-1.16631
REACTOME_SIGNALING_BY_THE_B_CELL_RECEPTOR_BCR		76	0.310454	1.16604	0.172608	0.809261	1	2319	tags=45%, list=30%, signal=63%	-1.16604
WP_SPHINGOLIPID_METABOLISM_IN_SENESCENCE		18	0.425003	1.16568	0.278926	0.808641	1	1825	tags=33%, list=23%, signal=43%	-1.16568
REACTOME_NEGATIVE_REGULATION_OF_MET_ACTIVITY		15	0.433512	1.16534	0.259481	0.807789	1	1474	tags=33%, list=19%, signal=41%	-1.16534
PID_ERBB1_DOWNSTREAM_PATHWAY		67	0.31874	1.16513	0.201613	0.806599	1	2234	tags=37%, list=29%, signal=52%	-1.16513
WP_TCELL_ANTIGEN_RECEPTOR_TCR_PATHWAY_DURING_STAPHYLOCOCCUS_AUREUS_INFECTION		23	0.396094	1.1625	0.251485	0.814929	1	2700	tags=65%, list=35%, signal=99%	-1.1625
TERAO_AOX4_TARGETS_SKIN_UP		20	0.404886	1.16174	0.251485	0.815916	1	1357	tags=35%, list=17%, signal=42%	-1.16174
REACTOME_UB_SPECIFIC_PROCESSING_PROTEASES		106	0.293656	1.16133	0.173828	0.815553	1	1945	tags=31%, list=25%, signal=41%	-1.16133
YU_MYC_TARGETS_UP		19	0.415536	1.16081	0.250485	0.815503	1	1127	tags=32%, list=14%, signal=37%	-1.16081
BUFFA_HYPOXIA_METAGENE		31	0.37267	1.15993	0.227799	0.816939	1	1909	tags=48%, list=24%, signal=64%	-1.15993
REACTOME_GOLGI_TO_ER_RETROGRADE_TRANSPORT		67	0.323741	1.15915	0.212121	0.818134	1	1410	tags=25%, list=18%, signal=31%	-1.15915
LIM_MAMMARY_STEM_CELL_DN		190	0.271786	1.15878	0.138728	0.81761	1	1428	tags=21%, list=18%, signal=25%	-1.15878
REACTOME_APOPTOSIS		107	0.28896	1.15851	0.171004	0.816631	1	1115	tags=21%, list=14%, signal=24%	-1.15851
PID_RAC1_REG_PATHWAY		24	0.395941	1.15844	0.267057	0.814851	1	722	tags=13%, list=9%, signal=14%	-1.15844
VILLANUEVA_LIVER_CANCER_KRT19_UP		65	0.314963	1.15814	0.207436	0.81399	1	845	tags=22%, list=11%, signal=24%	-1.15814
REACTOME_BILE_ACID_AND_BILE_SALT_METABOLISM		20	0.408126	1.1577	0.276471	0.813758	1	1228	tags=30%, list=16%, signal=36%	-1.1577
WP_CARDIAC_HYPERTROPHIC_RESPONSE		26	0.380544	1.15734	0.238462	0.813107	1	1061	tags=23%, list=14%, signal=27%	-1.15734
KEGG_BETA_ALANINE_METABOLISM		17	0.426967	1.15618	0.260956	0.815446	1	536	tags=18%, list=7%, signal=19%	-1.15618
YOKOE_CANCER_TESTIS_ANTIGENS		16	0.428175	1.1552	0.254438	0.817223	1	837	tags=31%, list=11%, signal=35%	-1.1552
YAO_TEMPORAL_RESPONSE_TO_PROGESTERONE_CLUSTER_9		31	0.380551	1.15319	0.248996	0.823073	1	1193	tags=32%, list=15%, signal=38%	-1.15319
ACEVEDO_LIVER_CANCER_WITH_H3K9ME3_UP		39	0.3505	1.15212	0.229008	0.825261	1	1166	tags=26%, list=15%, signal=30%	-1.15212
REACTOME_HCMV_LATE_EVENTS		49	0.334668	1.15174	0.223938	0.824692	1	921	tags=18%, list=12%, signal=21%	-1.15174
TURASHVILI_BREAST_DUCTAL_CARCINOMA_VS_LOBULAR_NORMAL_UP		34	0.360756	1.15134	0.226611	0.824205	1	633	tags=15%, list=8%, signal=16%	-1.15134
WP_MAPK_SIGNALING_PATHWAY		105	0.292126	1.15078	0.204239	0.824358	1	2364	tags=39%, list=30%, signal=55%	-1.15078
PID_HDAC_CLASSII_PATHWAY		24	0.387879	1.15057	0.266795	0.823268	1	1110	tags=33%, list=14%, signal=39%	-1.15057
FIGUEROA_AML_METHYLATION_CLUSTER_4_UP		47	0.332588	1.14715	0.264414	0.834794	1	1666	tags=32%, list=21%, signal=40%	-1.14715
KEGG_OOCYTE_MEIOSIS		44	0.341428	1.14649	0.217054	0.835369	1	1847	tags=32%, list=24%, signal=41%	-1.14649
REACTOME_DEACTIVATION_OF_THE_BETA_CATENIN_TRANSACTIVATING_COMPLEX		16	0.431767	1.14589	0.285429	0.835814	1	539	tags=19%, list=7%, signal=20%	-1.14589
LIU_OVARIAN_CANCER_TUMORS_AND_XENOGRAFTS_KINASES_DN		18	0.413143	1.14566	0.270378	0.834707	1	1763	tags=44%, list=23%, signal=57%	-1.14566
IBRAHIM_NRF1_UP		310	0.25371	1.14504	0.144144	0.835327	1	1735	tags=25%, list=22%, signal=31%	-1.14504
REACTOME_HCMV_INFECTION		67	0.31214	1.14494	0.209073	0.83371	1	948	tags=18%, list=12%, signal=20%	-1.14494
BROCKE_APOPTOSIS_REVERSED_BY_IL6		63	0.318114	1.14361	0.254269	0.83703	1	366	tags=10%, list=5%, signal=10%	-1.14361
KEGG_PYRIMIDINE_METABOLISM		59	0.323482	1.14359	0.23	0.835114	1	2441	tags=42%, list=31%, signal=61%	-1.14359
REACTOME_TELOMERE_MAINTENANCE		41	0.338896	1.14347	0.258491	0.833614	1	2572	tags=44%, list=33%, signal=65%	-1.14347
WP_TLR4_SIGNALING_AND_TOLERANCE		17	0.415932	1.1421	0.306202	0.837191	1	1390	tags=29%, list=18%, signal=36%	-1.1421
REACTOME_PHOSPHOLIPID_METABOLISM		129	0.281562	1.14153	0.17931	0.837397	1	1586	tags=22%, list=20%, signal=27%	-1.14153
YAO_TEMPORAL_RESPONSE_TO_PROGESTERONE_CLUSTER_10		50	0.329481	1.14106	0.244742	0.837123	1	1391	tags=30%, list=18%, signal=36%	-1.14106
SOGA_COLORECTAL_CANCER_MYC_DN		34	0.355889	1.14062	0.266272	0.8369	1	997	tags=15%, list=13%, signal=17%	-1.14062
HAN_JNK_SINGALING_DN		19	0.4101	1.14054	0.274162	0.835239	1	484	tags=21%, list=6%, signal=22%	-1.14054
COULOUARN_TEMPORAL_TGFB1_SIGNATURE_UP		58	0.315406	1.13886	0.242424	0.840049	1	901	tags=19%, list=12%, signal=21%	-1.13886
SMIRNOV_RESPONSE_TO_IR_6HR_UP		62	0.316583	1.13813	0.233141	0.840852	1	1035	tags=24%, list=13%, signal=28%	-1.13813
LIU_SOX4_TARGETS_UP		73	0.305383	1.13757	0.229907	0.84117	1	353	tags=12%, list=5%, signal=13%	-1.13757
REACTOME_CYTOSOLIC_SENSORS_OF_PATHOGEN_ASSOCIATED_DNA		39	0.339211	1.13669	0.255144	0.842756	1	1079	tags=23%, list=14%, signal=27%	-1.13669
IVANOVA_HEMATOPOIESIS_LATE_PROGENITOR		241	0.257079	1.13643	0.137736	0.841812	1	1626	tags=28%, list=21%, signal=35%	-1.13643
NAKAMURA_TUMOR_ZONE_PERIPHERAL_VS_CENTRAL_DN		290	0.251104	1.13585	0.142857	0.842216	1	1147	tags=18%, list=15%, signal=20%	-1.13585
ZHAN_MULTIPLE_MYELOMA_CD1_AND_CD2_DN		29	0.372818	1.13439	0.277372	0.846064	1	594	tags=10%, list=8%, signal=11%	-1.13439
ELVIDGE_HYPOXIA_DN		95	0.295492	1.13346	0.219231	0.847764	1	641	tags=16%, list=8%, signal=17%	-1.13346
REACTOME_TRAF6_MEDIATED_NF_KB_ACTIVATION		15	0.434203	1.13277	0.310976	0.848568	1	808	tags=27%, list=10%, signal=30%	-1.13277
RHEIN_ALL_GLUCOCORTICOID_THERAPY_DN		232	0.254845	1.12933	0.167308	0.860382	1	1752	tags=25%, list=22%, signal=32%	-1.12933
STAMBOLSKY_TARGETS_OF_MUTATED_TP53_DN		18	0.41366	1.12924	0.303462	0.858772	1	400	tags=17%, list=5%, signal=18%	-1.12924
WP_PARKINUBIQUITIN_PROTEASOMAL_SYSTEM_PATHWAY		36	0.344351	1.12915	0.278	0.857098	1	800	tags=17%, list=10%, signal=18%	-1.12915
GEORGES_TARGETS_OF_MIR192_AND_MIR215		403	0.241682	1.12718	0.113043	0.862879	1	924	tags=16%, list=12%, signal=18%	-1.12718
COLDREN_GEFITINIB_RESISTANCE_UP		53	0.322453	1.12667	0.252988	0.862911	1	1550	tags=25%, list=20%, signal=30%	-1.12667
REACTOME_SULFUR_AMINO_ACID_METABOLISM		20	0.401517	1.12547	0.274402	0.865826	1	1315	tags=30%, list=17%, signal=36%	-1.12547
KEGG_LYSINE_DEGRADATION		29	0.367948	1.1248	0.280464	0.866589	1	1283	tags=21%, list=16%, signal=25%	-1.1248
WP_APOPTOSISRELATED_NETWORK_DUE_TO_ALTERED_NOTCH3_IN_OVARIAN_CANCER		25	0.376839	1.12381	0.276471	0.868485	1	765	tags=20%, list=10%, signal=22%	-1.12381
BYSTRYKH_HEMATOPOIESIS_STEM_CELL_AND_BRAIN_QTL_TRANS		99	0.284427	1.12371	0.231801	0.866961	1	1938	tags=33%, list=25%, signal=44%	-1.12371
REACTOME_TNF_SIGNALING		29	0.366919	1.1236	0.270955	0.865414	1	1068	tags=28%, list=14%, signal=32%	-1.1236
KEGG_APOPTOSIS		46	0.321745	1.12239	0.270161	0.868424	1	1447	tags=28%, list=19%, signal=34%	-1.12239
REACTOME_NUCLEOTIDE_SALVAGE		15	0.433252	1.12217	0.310782	0.867355	1	2233	tags=47%, list=29%, signal=65%	-1.12217
GRAHAM_NORMAL_QUIESCENT_VS_NORMAL_DIVIDING_DN		26	0.36519	1.12092	0.289524	0.870365	1	1736	tags=31%, list=22%, signal=39%	-1.12092
REACTOME_CELL_CYCLE_MITOTIC		259	0.252708	1.12069	0.17128	0.869326	1	1374	tags=24%, list=18%, signal=28%	-1.12069
KEGG_MAPK_SIGNALING_PATHWAY		109	0.281945	1.12056	0.226744	0.867871	1	2364	tags=37%, list=30%, signal=52%	-1.12056
LINSLEY_MIR16_TARGETS		117	0.27368	1.12034	0.231076	0.866712	1	1461	tags=26%, list=19%, signal=32%	-1.12034
LEE_LIVER_CANCER_ACOX1_UP		27	0.367118	1.12005	0.280899	0.865943	1	710	tags=22%, list=9%, signal=24%	-1.12005
KAAB_FAILED_HEART_ATRIUM_DN		95	0.289868	1.11973	0.234862	0.865321	1	846	tags=17%, list=11%, signal=19%	-1.11973
REACTOME_HOMOLOGOUS_DNA_PAIRING_AND_STRAND_EXCHANGE		15	0.416827	1.11793	0.310139	0.870604	1	354	tags=20%, list=5%, signal=21%	-1.11793
WANG_RESPONSE_TO_GSK3_INHIBITOR_SB216763_DN		169	0.263909	1.11725	0.198853	0.871524	1	751	tags=16%, list=10%, signal=17%	-1.11725
WP_PRADERWILLI_AND_ANGELMAN_SYNDROME		20	0.388929	1.11658	0.317308	0.872268	1	1274	tags=30%, list=16%, signal=36%	-1.11658
WP_FLUOROPYRIMIDINE_ACTIVITY		15	0.422232	1.11649	0.307992	0.870671	1	822	tags=33%, list=11%, signal=37%	-1.11649
REACTOME_TRANS_GOLGI_NETWORK_VESICLE_BUDDING		54	0.318916	1.11606	0.274583	0.870391	1	1986	tags=35%, list=25%, signal=47%	-1.11606
REACTOME_MITOCHONDRIAL_TRNA_AMINOACYLATION		17	0.422384	1.11566	0.301775	0.870131	1	1089	tags=29%, list=14%, signal=34%	-1.11566
PURBEY_TARGETS_OF_CTBP1_AND_SATB1_UP		37	0.344274	1.11549	0.294466	0.868918	1	1365	tags=30%, list=18%, signal=36%	-1.11549
FORTSCHEGGER_PHF8_TARGETS_DN		388	0.242519	1.11541	0.163636	0.867277	1	1267	tags=20%, list=16%, signal=23%	-1.11541
GARGALOVIC_RESPONSE_TO_OXIDIZED_PHOSPHOLIPIDS_BLUE_DN		25	0.371068	1.1151	0.292276	0.866641	1	1073	tags=28%, list=14%, signal=32%	-1.1151
GRAESSMANN_RESPONSE_TO_MC_AND_SERUM_DEPRIVATION_UP		77	0.299234	1.11501	0.257143	0.865053	1	1208	tags=21%, list=15%, signal=24%	-1.11501
REACTOME_DNA_DAMAGE_RECOGNITION_IN_GG_NER		23	0.38134	1.11424	0.299228	0.866206	1	1582	tags=39%, list=20%, signal=49%	-1.11424
WP_VITAMIN_A_AND_CAROTENOID_METABOLISM		16	0.421328	1.1141	0.330629	0.864879	1	363	tags=25%, list=5%, signal=26%	-1.1141
REACTOME_TRANSLESION_SYNTHESIS_BY_Y_FAMILY_DNA_POLYMERASES_BYPASSES_LESIONS_ON_DNA_TEMPLATE		22	0.380924	1.11399	0.300203	0.863451	1	2036	tags=36%, list=26%, signal=49%	-1.11399
TONKS_TARGETS_OF_RUNX1_RUNX1T1_FUSION_GRANULOCYTE_UP		23	0.385633	1.11267	0.305182	0.866872	1	1471	tags=30%, list=19%, signal=37%	-1.11267
EHLERS_ANEUPLOIDY_UP		21	0.384071	1.11237	0.295775	0.86616	1	987	tags=29%, list=13%, signal=33%	-1.11237
LIU_COMMON_CANCER_GENES		29	0.366094	1.11205	0.305221	0.865642	1	938	tags=28%, list=12%, signal=31%	-1.11205
REACTOME_REGULATION_OF_CHOLESTEROL_BIOSYNTHESIS_BY_SREBP_SREBF		38	0.33866	1.11104	0.293635	0.867626	1	506	tags=16%, list=6%, signal=17%	-1.11104
BIOCARTA_MTOR_PATHWAY		16	0.408913	1.11103	0.296223	0.865773	1	2153	tags=44%, list=28%, signal=60%	-1.11103
YAGI_AML_RELAPSE_PROGNOSIS		21	0.393478	1.1109	0.295499	0.864483	1	551	tags=19%, list=7%, signal=20%	-1.1109
REACTOME_METABOLISM_OF_AMINO_ACIDS_AND_DERIVATIVES		246	0.249203	1.11069	0.193431	0.86342	1	1354	tags=20%, list=17%, signal=24%	-1.11069
WP_BARDETBIEDL_SYNDROME		48	0.326075	1.11058	0.280079	0.861956	1	1609	tags=33%, list=21%, signal=42%	-1.11058
KRASNOSELSKAYA_ILF3_TARGETS_DN		23	0.383475	1.11043	0.310484	0.860747	1	783	tags=26%, list=10%, signal=29%	-1.11043
REACTOME_SIGNALING_BY_ROBO_RECEPTORS		165	0.264066	1.10996	0.207547	0.860723	1	1888	tags=28%, list=24%, signal=37%	-1.10996
REACTOME_CELL_DEATH_SIGNALLING_VIA_NRAGE_NRIF_AND_NADE		39	0.334845	1.10932	0.297456	0.861476	1	2054	tags=36%, list=26%, signal=48%	-1.10932
TARTE_PLASMA_CELL_VS_PLASMABLAST_DN		188	0.258722	1.10884	0.202247	0.861512	1	2134	tags=35%, list=27%, signal=47%	-1.10884
REACTOME_DISEASES_OF_METABOLISM		100	0.278173	1.10843	0.258427	0.861343	1	1541	tags=28%, list=20%, signal=34%	-1.10843
REACTOME_CLATHRIN_MEDIATED_ENDOCYTOSIS		94	0.284485	1.10799	0.241573	0.861136	1	2061	tags=33%, list=26%, signal=44%	-1.10799
REACTOME_MITOTIC_METAPHASE_AND_ANAPHASE		142	0.2624	1.10629	0.229205	0.865826	1	1148	tags=22%, list=15%, signal=25%	-1.10629
PAL_PRMT5_TARGETS_UP		129	0.268053	1.10568	0.252466	0.866412	1	1347	tags=23%, list=17%, signal=28%	-1.10568
KEGG_GLIOMA		26	0.367372	1.10534	0.299424	0.865956	1	2234	tags=42%, list=29%, signal=59%	-1.10534
REACTOME_IRON_UPTAKE_AND_TRANSPORT		29	0.359623	1.10457	0.313559	0.867099	1	1508	tags=31%, list=19%, signal=38%	-1.10457
WP_INSULIN_SIGNALING		92	0.282371	1.10372	0.258893	0.868524	1	2393	tags=45%, list=31%, signal=64%	-1.10372
LUI_THYROID_CANCER_CLUSTER_3		19	0.398258	1.10309	0.326044	0.869213	1	2262	tags=47%, list=29%, signal=67%	-1.10309
KUMAR_AUTOPHAGY_NETWORK		30	0.360454	1.10307	0.305769	0.867487	1	1792	tags=40%, list=23%, signal=52%	-1.10307
GRYDER_PAX3FOXO1_ENHANCERS_KO_DOWN		241	0.249531	1.10201	0.20298	0.869749	1	1022	tags=17%, list=13%, signal=19%	-1.10201
LIM_MAMMARY_LUMINAL_MATURE_UP		38	0.333653	1.10126	0.305118	0.870773	1	748	tags=21%, list=10%, signal=23%	-1.10126
ZHAN_MULTIPLE_MYELOMA_CD1_UP		15	0.423173	1.10113	0.323232	0.869468	1	985	tags=33%, list=13%, signal=38%	-1.10113
BROWNE_HCMV_INFECTION_1HR_UP		18	0.401939	1.09797	0.329193	0.880065	1	594	tags=17%, list=8%, signal=18%	-1.09797
MARIADASON_REGULATED_BY_HISTONE_ACETYLATION_DN		27	0.358917	1.09648	0.321705	0.884157	1	1347	tags=30%, list=17%, signal=36%	-1.09648
GARY_CD5_TARGETS_DN		287	0.246026	1.09611	0.214669	0.883901	1	1577	tags=26%, list=20%, signal=32%	-1.09611
PID_IL1_PATHWAY		21	0.382162	1.09591	0.327651	0.882859	1	1390	tags=29%, list=18%, signal=35%	-1.09591
REN_ALVEOLAR_RHABDOMYOSARCOMA_DN		247	0.246487	1.09563	0.219643	0.882221	1	1532	tags=21%, list=20%, signal=26%	-1.09563
PETROVA_ENDOTHELIUM_LYMPHATIC_VS_BLOOD_UP		48	0.316087	1.09562	0.311891	0.880452	1	786	tags=17%, list=10%, signal=18%	-1.09562
PECE_MAMMARY_STEM_CELL_UP		81	0.285909	1.09541	0.284333	0.879488	1	2159	tags=35%, list=28%, signal=47%	-1.09541
REACTOME_INTRACELLULAR_SIGNALING_BY_SECOND_MESSENGERS		173	0.258302	1.09459	0.256554	0.880919	1	1469	tags=24%, list=19%, signal=29%	-1.09459
REACTOME_HIV_TRANSCRIPTION_INITIATION		36	0.335125	1.09199	0.30083	0.889364	1	357	tags=11%, list=5%, signal=12%	-1.09199
REACTOME_COSTIMULATION_BY_THE_CD28_FAMILY		26	0.36382	1.09194	0.326772	0.887756	1	2153	tags=46%, list=28%, signal=64%	-1.09194
REACTOME_DEUBIQUITINATION		150	0.260879	1.09187	0.262868	0.886226	1	1649	tags=25%, list=21%, signal=32%	-1.09187
SCHLOSSER_MYC_TARGETS_REPRESSED_BY_SERUM		118	0.271713	1.09182	0.260952	0.884612	1	1583	tags=27%, list=20%, signal=34%	-1.09182
KIM_GERMINAL_CENTER_T_HELPER_UP		37	0.332048	1.09163	0.29783	0.883632	1	1574	tags=32%, list=20%, signal=40%	-1.09163
PID_FANCONI_PATHWAY		15	0.412907	1.09154	0.333333	0.882193	1	421	tags=20%, list=5%, signal=21%	-1.09154
BURTON_ADIPOGENESIS_10		20	0.389003	1.09154	0.327586	0.880436	1	1582	tags=45%, list=20%, signal=56%	-1.09154
SMID_BREAST_CANCER_RELAPSE_IN_BRAIN_DN		34	0.338315	1.0907	0.288703	0.882032	1	877	tags=18%, list=11%, signal=20%	-1.0907
BLANCO_MELO_BETA_INTERFERON_TREATED_BRONCHIAL_EPITHELIAL_CELLS_DN		46	0.317052	1.08893	0.290135	0.887406	1	1163	tags=26%, list=15%, signal=30%	-1.08893
REACTOME_METABOLISM_OF_LIPIDS		412	0.233513	1.08863	0.190217	0.886808	1	1626	tags=23%, list=21%, signal=27%	-1.08863
BIOCARTA_NFAT_PATHWAY		21	0.386847	1.08837	0.328657	0.886067	1	1269	tags=29%, list=16%, signal=34%	-1.08837
KIM_ALL_DISORDERS_DURATION_CORR_DN		107	0.275464	1.08824	0.26975	0.884782	1	893	tags=15%, list=11%, signal=17%	-1.08824
RAY_TUMORIGENESIS_BY_ERBB2_CDC25A_DN		130	0.265191	1.0879	0.241818	0.884343	1	2165	tags=32%, list=28%, signal=43%	-1.0879
REACTOME_PROGRAMMED_CELL_DEATH		122	0.269817	1.08784	0.280289	0.882837	1	1182	tags=20%, list=15%, signal=23%	-1.08784
ZHOU_TNF_SIGNALING_4HR		29	0.348755	1.08774	0.313808	0.881486	1	554	tags=14%, list=7%, signal=15%	-1.08774
KEGG_NOD_LIKE_RECEPTOR_SIGNALING_PATHWAY		19	0.387715	1.08752	0.311024	0.880643	1	539	tags=21%, list=7%, signal=23%	-1.08752
BOYAULT_LIVER_CANCER_SUBCLASS_G12_UP		25	0.356991	1.08716	0.315891	0.880316	1	661	tags=20%, list=8%, signal=22%	-1.08716
REACTOME_INNATE_IMMUNE_SYSTEM		497	0.229596	1.08705	0.17657	0.879033	1	1956	tags=29%, list=25%, signal=36%	-1.08705
NIKOLSKY_BREAST_CANCER_1Q21_AMPLICON		15	0.416787	1.08699	0.370143	0.877568	1	619	tags=20%, list=8%, signal=22%	-1.08699
KEGG_AXON_GUIDANCE		66	0.296881	1.08633	0.301556	0.878275	1	671	tags=12%, list=9%, signal=13%	-1.08633
SCHMIDT_POR_TARGETS_IN_LIMB_BUD_UP		18	0.397725	1.08601	0.340816	0.877871	1	751	tags=22%, list=10%, signal=25%	-1.08601
DARWICHE_SQUAMOUS_CELL_CARCINOMA_UP		73	0.289705	1.08587	0.303797	0.876741	1	1313	tags=23%, list=17%, signal=28%	-1.08587
KARLSSON_TGFB1_TARGETS_UP		92	0.279861	1.08553	0.296154	0.8764	1	1371	tags=26%, list=18%, signal=31%	-1.08553
WONG_EMBRYONIC_STEM_CELL_CORE		203	0.252541	1.08527	0.271218	0.875728	1	1412	tags=24%, list=18%, signal=29%	-1.08527
WP_G13_SIGNALING_PATHWAY		23	0.37433	1.08384	0.347475	0.8797	1	1845	tags=43%, list=24%, signal=57%	-1.08384
ALCALA_APOPTOSIS		53	0.3016	1.08368	0.319703	0.878617	1	2067	tags=38%, list=26%, signal=51%	-1.08368
REACTOME_HDR_THROUGH_SINGLE_STRAND_ANNEALING_SSA		16	0.399246	1.08346	0.343313	0.877715	1	354	tags=19%, list=5%, signal=20%	-1.08346
REACTOME_REGULATION_OF_EXPRESSION_OF_SLITS_AND_ROBOS		135	0.263791	1.08233	0.275093	0.880431	1	1118	tags=20%, list=14%, signal=23%	-1.08233
CHEMNITZ_RESPONSE_TO_PROSTAGLANDIN_E2_DN		170	0.257996	1.08033	0.268245	0.886541	1	1379	tags=24%, list=18%, signal=29%	-1.08033
REACTOME_NUCLEOTIDE_CATABOLISM		25	0.357685	1.07974	0.335354	0.887218	1	917	tags=24%, list=12%, signal=27%	-1.07974
WESTON_VEGFA_TARGETS_3HR		24	0.362722	1.07814	0.338552	0.891636	1	763	tags=21%, list=10%, signal=23%	-1.07814
HOSHIDA_LIVER_CANCER_LATE_RECURRENCE_DN		35	0.331357	1.0776	0.335378	0.892061	1	798	tags=20%, list=10%, signal=22%	-1.0776
HOOI_ST7_TARGETS_UP		35	0.335062	1.07736	0.332123	0.891343	1	1606	tags=34%, list=21%, signal=43%	-1.07736
BIOCARTA_DEATH_PATHWAY		19	0.381481	1.07724	0.339394	0.890155	1	539	tags=26%, list=7%, signal=28%	-1.07724
GUTIERREZ_MULTIPLE_MYELOMA_UP		19	0.383351	1.07682	0.342308	0.890151	1	467	tags=16%, list=6%, signal=17%	-1.07682
REACTOME_METABOLISM_OF_PORPHYRINS		15	0.402612	1.07398	0.357553	0.899914	1	1201	tags=33%, list=15%, signal=39%	-1.07398
ZHAN_MULTIPLE_MYELOMA_LB_UP		20	0.387836	1.07353	0.357414	0.89998	1	1399	tags=30%, list=18%, signal=36%	-1.07353
GENTILE_UV_LOW_DOSE_DN		37	0.325514	1.07284	0.330661	0.900871	1	781	tags=16%, list=10%, signal=18%	-1.07284
MITSIADES_RESPONSE_TO_APLIDIN_DN		147	0.258976	1.07279	0.284685	0.899359	1	954	tags=17%, list=12%, signal=19%	-1.07279
YAO_TEMPORAL_RESPONSE_TO_PROGESTERONE_CLUSTER_17		142	0.261418	1.0715	0.301587	0.902692	1	1832	tags=32%, list=23%, signal=42%	-1.0715
LANG_MYB_FAMILY_TARGETS		21	0.373365	1.07087	0.375494	0.903504	1	1517	tags=33%, list=19%, signal=41%	-1.07087
REACTOME_G2_M_DNA_DAMAGE_CHECKPOINT		24	0.36139	1.06896	0.354582	0.909394	1	402	tags=17%, list=5%, signal=18%	-1.06896
WANG_LMO4_TARGETS_DN		232	0.242803	1.06869	0.27289	0.908809	1	1544	tags=21%, list=20%, signal=25%	-1.06869
CARRILLOREIXACH_HEPATOBLASTOMA_VS_NORMAL_UP		373	0.232848	1.06805	0.247423	0.909778	1	1046	tags=17%, list=13%, signal=18%	-1.06805
WP_2Q37_COPY_NUMBER_VARIATION_SYNDROME		51	0.308203	1.06739	0.357422	0.910677	1	1836	tags=33%, list=24%, signal=43%	-1.06739
KOINUMA_TARGETS_OF_SMAD2_OR_SMAD3		391	0.230361	1.067	0.258993	0.910505	1	1558	tags=24%, list=20%, signal=29%	-1.067
NATSUME_RESPONSE_TO_INTERFERON_BETA_UP		23	0.370373	1.06399	0.361225	0.92084	1	473	tags=17%, list=6%, signal=18%	-1.06399
REACTOME_HSP90_CHAPERONE_CYCLE_FOR_STEROID_HORMONE_RECEPTORS_SHR_IN_THE_PRESENCE_OF_LIGAND		26	0.351382	1.06367	0.361328	0.920458	1	1332	tags=23%, list=17%, signal=28%	-1.06367
MULLIGHAN_NPM1_MUTATED_SIGNATURE_2_UP		62	0.290382	1.06308	0.344106	0.921166	1	1736	tags=31%, list=22%, signal=39%	-1.06308
LIN_MELANOMA_COPY_NUMBER_UP		37	0.325275	1.06272	0.373849	0.920775	1	1144	tags=24%, list=15%, signal=28%	-1.06272
REN_BOUND_BY_E2F		21	0.365745	1.06225	0.353282	0.920918	1	1638	tags=33%, list=21%, signal=42%	-1.06225
GAZDA_DIAMOND_BLACKFAN_ANEMIA_ERYTHROID_DN		207	0.244187	1.06174	0.301989	0.921318	1	1201	tags=20%, list=15%, signal=23%	-1.06174
AMIT_EGF_RESPONSE_120_HELA		27	0.349082	1.06152	0.341556	0.920528	1	1258	tags=22%, list=16%, signal=26%	-1.06152
REACTOME_SIGNALING_BY_NOTCH		94	0.271882	1.06126	0.330097	0.919828	1	1183	tags=18%, list=15%, signal=21%	-1.06126
REACTOME_TRNA_MODIFICATION_IN_THE_NUCLEUS_AND_CYTOSOL		29	0.346306	1.06063	0.379845	0.920718	1	1357	tags=34%, list=17%, signal=42%	-1.06063
BOYLAN_MULTIPLE_MYELOMA_PCA3_DN		33	0.332655	1.0604	0.352601	0.919946	1	1193	tags=24%, list=15%, signal=28%	-1.0604
REACTOME_GAP_JUNCTION_TRAFFICKING_AND_REGULATION		16	0.38635	1.05979	0.370874	0.920702	1	1532	tags=31%, list=20%, signal=39%	-1.05979
DE_YY1_TARGETS_DN		51	0.301936	1.05954	0.334623	0.919975	1	1705	tags=33%, list=22%, signal=42%	-1.05954
REACTOME_TRANSCRIPTIONAL_REGULATION_BY_RUNX1		99	0.272525	1.05898	0.353053	0.920552	1	1184	tags=19%, list=15%, signal=22%	-1.05898
GAL_LEUKEMIC_STEM_CELL_UP		60	0.297153	1.05895	0.362264	0.918996	1	353	tags=12%, list=5%, signal=12%	-1.05895
STEARMAN_LUNG_CANCER_EARLY_VS_LATE_UP		85	0.276362	1.05856	0.337017	0.918873	1	2027	tags=32%, list=26%, signal=42%	-1.05856
MEISSNER_NPC_HCP_WITH_H3K4ME3_AND_H3K27ME3		56	0.29898	1.05817	0.346457	0.918778	1	1636	tags=23%, list=21%, signal=29%	-1.05817
NUYTTEN_EZH2_TARGETS_DN		496	0.225767	1.05766	0.264973	0.91914	1	1567	tags=23%, list=20%, signal=27%	-1.05766
REACTOME_TOLL_LIKE_RECEPTOR_TLR1_TLR2_CASCADE		57	0.297737	1.05763	0.372188	0.917618	1	2209	tags=44%, list=28%, signal=61%	-1.05763
KORKOLA_EMBRYONAL_CARCINOMA_UP		18	0.378846	1.05681	0.383333	0.919156	1	850	tags=28%, list=11%, signal=31%	-1.05681
WP_TNFRELATED_WEAK_INDUCER_OF_APOPTOSIS_TWEAK_SIGNALING_PATHWAY		18	0.378568	1.05515	0.376218	0.924143	1	447	tags=17%, list=6%, signal=18%	-1.05515
REACTOME_SIGNALLING_TO_ERKS		21	0.369725	1.0551	0.371369	0.922689	1	2908	tags=67%, list=37%, signal=106%	-1.0551
CORRE_MULTIPLE_MYELOMA_UP		28	0.345945	1.05461	0.388785	0.922974	1	1838	tags=39%, list=24%, signal=51%	-1.05461
TANAKA_METHYLATED_IN_ESOPHAGEAL_CARCINOMA		38	0.316031	1.05356	0.359768	0.925487	1	2005	tags=29%, list=26%, signal=39%	-1.05356
KEGG_DRUG_METABOLISM_OTHER_ENZYMES		16	0.3903	1.05126	0.387712	0.933155	1	2486	tags=56%, list=32%, signal=82%	-1.05126
HU_GENOTOXIC_DAMAGE_4HR		15	0.395201	1.05124	0.380952	0.931589	1	916	tags=20%, list=12%, signal=23%	-1.05124
REACTOME_RMTS_METHYLATE_HISTONE_ARGININES		21	0.370296	1.04939	0.402806	0.937074	1	556	tags=19%, list=7%, signal=20%	-1.04939
RAMPON_ENRICHED_LEARNING_ENVIRONMENT_LATE_UP		17	0.387992	1.04832	0.378323	0.939651	1	424	tags=18%, list=5%, signal=19%	-1.04832
PID_NFAT_3PATHWAY		30	0.333534	1.04636	0.380228	0.945711	1	1293	tags=23%, list=17%, signal=28%	-1.04636
GRADE_COLON_AND_RECTAL_CANCER_DN		38	0.318592	1.0463	0.355513	0.944251	1	1174	tags=24%, list=15%, signal=28%	-1.0463
REACTOME_O_LINKED_GLYCOSYLATION		22	0.368555	1.04616	0.3875	0.943176	1	565	tags=18%, list=7%, signal=20%	-1.04616
PID_NETRIN_PATHWAY		22	0.358493	1.04589	0.371369	0.94261	1	2873	tags=59%, list=37%, signal=93%	-1.04589
BRIDEAU_IMPRINTED_GENES		29	0.342102	1.0457	0.392157	0.941718	1	1274	tags=41%, list=16%, signal=49%	-1.0457
REACTOME_MATURATION_OF_SARSCOV2_SPIKE_PROTEIN		23	0.350455	1.04568	0.347458	0.940174	1	1321	tags=26%, list=17%, signal=31%	-1.04568
HERNANDEZ_ABERRANT_MITOSIS_BY_DOCETACEL_2NM_UP		27	0.352635	1.04559	0.414487	0.93881	1	1336	tags=33%, list=17%, signal=40%	-1.04559
WP_JOUBERT_SYNDROME		46	0.310322	1.04553	0.362376	0.937397	1	1582	tags=24%, list=20%, signal=30%	-1.04553
POMEROY_MEDULLOBLASTOMA_PROGNOSIS_UP		28	0.344631	1.04496	0.384615	0.937957	1	709	tags=18%, list=9%, signal=20%	-1.04496
GENTILE_UV_HIGH_DOSE_DN		141	0.255017	1.04446	0.364963	0.938296	1	1111	tags=20%, list=14%, signal=23%	-1.04446
SWEET_KRAS_ONCOGENIC_SIGNATURE		47	0.305268	1.04408	0.37475	0.938204	1	1957	tags=40%, list=25%, signal=54%	-1.04408
REACTOME_ADAPTIVE_IMMUNE_SYSTEM		371	0.225137	1.0437	0.306818	0.938069	1	1597	tags=24%, list=20%, signal=29%	-1.0437
SPIELMAN_LYMPHOBLAST_EUROPEAN_VS_ASIAN_DN		359	0.227578	1.04328	0.301724	0.938139	1	1511	tags=24%, list=19%, signal=28%	-1.04328
SCHUHMACHER_MYC_TARGETS_UP		57	0.291331	1.04314	0.354709	0.937023	1	1313	tags=23%, list=17%, signal=27%	-1.04314
LASTOWSKA_NEUROBLASTOMA_COPY_NUMBER_DN		468	0.221915	1.04127	0.296928	0.942558	1	1752	tags=25%, list=22%, signal=30%	-1.04127
WP_ANGIOPOIETINLIKE_PROTEIN_8_REGULATORY_PATHWAY		73	0.280372	1.03918	0.371316	0.949282	1	2236	tags=47%, list=29%, signal=65%	-1.03918
REACTOME_G_ALPHA_Q_SIGNALLING_EVENTS		70	0.278614	1.03792	0.375969	0.952522	1	1230	tags=21%, list=16%, signal=25%	-1.03792
RUTELLA_RESPONSE_TO_HGF_VS_CSF2RB_AND_IL4_UP		204	0.238709	1.03659	0.362429	0.956197	1	1544	tags=22%, list=20%, signal=27%	-1.03659
REACTOME_DISEASES_OF_GLYCOSYLATION		52	0.299716	1.03655	0.376726	0.954739	1	1434	tags=25%, list=18%, signal=30%	-1.03655
LASTOWSKA_NEUROBLASTOMA_COPY_NUMBER_UP		102	0.262539	1.03633	0.382826	0.95394	1	2046	tags=30%, list=26%, signal=41%	-1.03633
WANG_TUMOR_INVASIVENESS_DN		129	0.254292	1.03624	0.370155	0.952685	1	1312	tags=19%, list=17%, signal=23%	-1.03624
RASHI_RESPONSE_TO_IONIZING_RADIATION_3		30	0.332171	1.03521	0.393939	0.955138	1	317	tags=10%, list=4%, signal=10%	-1.03521
TSENG_IRS1_TARGETS_UP		51	0.295201	1.03506	0.383613	0.954121	1	1189	tags=24%, list=15%, signal=28%	-1.03506
REACTOME_CHROMOSOME_MAINTENANCE		47	0.297695	1.03462	0.398844	0.954314	1	2352	tags=36%, list=30%, signal=51%	-1.03462
TAVOR_CEBPA_TARGETS_UP		20	0.360615	1.0343	0.413462	0.953894	1	763	tags=20%, list=10%, signal=22%	-1.0343
BARIS_THYROID_CANCER_UP		17	0.391563	1.0337	0.41	0.954681	1	517	tags=18%, list=7%, signal=19%	-1.0337
REACTOME_RESPIRATORY_ELECTRON_TRANSPORT_ATP_SYNTHESIS_BY_CHEMIOSMOTIC_COUPLING_AND_HEAT_PRODUCTION_BY_UNCOUPLING_PROTEINS		86	0.271684	1.03356	0.393536	0.95362	1	1592	tags=22%, list=20%, signal=27%	-1.03356
DARWICHE_PAPILLOMA_RISK_HIGH_UP		72	0.275386	1.03314	0.383534	0.953636	1	1313	tags=22%, list=17%, signal=26%	-1.03314
LINDGREN_BLADDER_CANCER_CLUSTER_3_UP		151	0.246482	1.03275	0.361314	0.953534	1	1136	tags=20%, list=15%, signal=23%	-1.03275
WP_TNFALPHA_SIGNALING_PATHWAY		50	0.301044	1.03238	0.40113	0.953395	1	523	tags=14%, list=7%, signal=15%	-1.03238
WP_PROSTAGLANDIN_SYNTHESIS_AND_REGULATION		19	0.36912	1.03213	0.408	0.952805	1	2086	tags=47%, list=27%, signal=65%	-1.03213
ONKEN_UVEAL_MELANOMA_UP		458	0.217088	1.03117	0.322344	0.954882	1	1514	tags=22%, list=19%, signal=25%	-1.03117
SMID_BREAST_CANCER_LUMINAL_B_DN		166	0.24813	1.0311	0.383459	0.953549	1	862	tags=15%, list=11%, signal=17%	-1.0311
XU_GH1_AUTOCRINE_TARGETS_UP		88	0.268396	1.03072	0.395437	0.953355	1	1744	tags=26%, list=22%, signal=33%	-1.03072
PID_TRAIL_PATHWAY		15	0.389131	1.03039	0.405295	0.953047	1	831	tags=20%, list=11%, signal=22%	-1.03039
RICKMAN_METASTASIS_UP		188	0.238742	1.02992	0.354839	0.953269	1	1582	tags=23%, list=20%, signal=29%	-1.02992
REACTOME_FATTY_ACID_METABOLISM		100	0.262972	1.02981	0.4	0.952111	1	1620	tags=26%, list=21%, signal=32%	-1.02981
ZHAN_MULTIPLE_MYELOMA_CD1_AND_CD2_UP		49	0.298136	1.02943	0.394422	0.951994	1	1421	tags=27%, list=18%, signal=32%	-1.02943
HUANG_GATA2_TARGETS_UP		62	0.282428	1.02907	0.38447	0.951835	1	849	tags=21%, list=11%, signal=23%	-1.02907
REACTOME_ORGANELLE_BIOGENESIS_AND_MAINTENANCE		150	0.246312	1.02896	0.391382	0.950654	1	1110	tags=20%, list=14%, signal=23%	-1.02896
HOSHIDA_LIVER_CANCER_SURVIVAL_DN		61	0.284827	1.02887	0.394841	0.949409	1	980	tags=18%, list=13%, signal=20%	-1.02887
DELYS_THYROID_CANCER_UP		172	0.243939	1.02863	0.366541	0.948776	1	1636	tags=26%, list=21%, signal=32%	-1.02863
BIOCARTA_TCR_PATHWAY		17	0.377385	1.02782	0.415094	0.950365	1	2319	tags=47%, list=30%, signal=67%	-1.02782
MANNE_COVID19_ICU_VS_HEALTHY_DONOR_PLATELETS_UP		42	0.307589	1.02689	0.397004	0.952369	1	1501	tags=26%, list=19%, signal=32%	-1.02689
BIOCARTA_BIOPEPTIDES_PATHWAY		16	0.380946	1.02598	0.415205	0.954422	1	556	tags=19%, list=7%, signal=20%	-1.02598
LIANG_HEMATOPOIESIS_STEM_CELL_NUMBER_LARGE_VS_TINY_UP		18	0.370074	1.02595	0.414991	0.953003	1	2214	tags=56%, list=28%, signal=77%	-1.02595
WP_RAS_SIGNALING		89	0.268861	1.02529	0.408663	0.954018	1	1823	tags=26%, list=23%, signal=33%	-1.02529
REACTOME_METABOLISM_OF_STEROIDS		80	0.269854	1.02498	0.425139	0.953716	1	1626	tags=26%, list=21%, signal=33%	-1.02498
REACTOME_ANTIGEN_PROCESSING_CROSS_PRESENTATION		68	0.278639	1.02492	0.411429	0.952393	1	1458	tags=25%, list=19%, signal=30%	-1.02492
REACTOME_ACTIVATION_OF_THE_MRNA_UPON_BINDING_OF_THE_CAP_BINDING_COMPLEX_AND_EIFS_AND_SUBSEQUENT_BINDING_TO_43S		51	0.297216	1.02476	0.407407	0.951474	1	2194	tags=37%, list=28%, signal=51%	-1.02476
MARTENS_TRETINOIN_RESPONSE_DN		382	0.220373	1.02445	0.361217	0.951105	1	1357	tags=21%, list=17%, signal=24%	-1.02445
LIU_VMYB_TARGETS_UP		65	0.275978	1.02262	0.40797	0.956608	1	1430	tags=23%, list=18%, signal=28%	-1.02262
FARMER_BREAST_CANCER_BASAL_VS_LULMINAL		142	0.246451	1.02187	0.407407	0.957929	1	1086	tags=19%, list=14%, signal=22%	-1.02187
GAJATE_RESPONSE_TO_TRABECTEDIN_UP		29	0.323686	1.02164	0.410417	0.957266	1	1991	tags=41%, list=26%, signal=55%	-1.02164
JOHNSTONE_PARVB_TARGETS_3_DN		450	0.216308	1.02159	0.376307	0.955897	1	1547	tags=22%, list=20%, signal=26%	-1.02159
HAN_SATB1_TARGETS_UP		206	0.233991	1.02078	0.398148	0.957527	1	767	tags=14%, list=10%, signal=15%	-1.02078
WP_IL1_SIGNALING_PATHWAY		33	0.324236	1.02071	0.416185	0.956254	1	2706	tags=52%, list=35%, signal=79%	-1.02071
WP_MELANOMA		28	0.338759	1.02066	0.426326	0.95494	1	423	tags=18%, list=5%, signal=19%	-1.02066
SHEDDEN_LUNG_CANCER_POOR_SURVIVAL_A6		212	0.232894	1.02061	0.394118	0.953568	1	1543	tags=24%, list=20%, signal=29%	-1.02061
REACTOME_BUDDING_AND_MATURATION_OF_HIV_VIRION		20	0.360748	1.01957	0.435897	0.955958	1	1538	tags=35%, list=20%, signal=43%	-1.01957
RIZKI_TUMOR_INVASIVENESS_3D_DN		138	0.246816	1.01914	0.414498	0.956066	1	1895	tags=28%, list=24%, signal=36%	-1.01914
WP_STEROL_REGULATORY_ELEMENTBINDING_PROTEINS_SREBP_SIGNALING		43	0.304888	1.01883	0.421875	0.955827	1	1014	tags=19%, list=13%, signal=21%	-1.01883
REACTOME_NRAGE_SIGNALS_DEATH_THROUGH_JNK		33	0.319028	1.01797	0.409615	0.957607	1	2054	tags=36%, list=26%, signal=49%	-1.01797
DANG_REGULATED_BY_MYC_UP		49	0.292196	1.0179	0.424603	0.95634	1	1956	tags=29%, list=25%, signal=38%	-1.0179
PID_IL8_CXCR2_PATHWAY		18	0.36482	1.01755	0.450758	0.956207	1	2278	tags=50%, list=29%, signal=70%	-1.01755
REACTOME_L1CAM_INTERACTIONS		62	0.277759	1.01737	0.410985	0.9554	1	1658	tags=31%, list=21%, signal=39%	-1.01737
BLANCO_MELO_COVID19_SARS_COV_2_INFECTION_A594_ACE2_EXPRESSING_CELLS_DN		44	0.302705	1.01655	0.404135	0.957064	1	1398	tags=30%, list=18%, signal=36%	-1.01655
REACTOME_NERVOUS_SYSTEM_DEVELOPMENT		358	0.222749	1.01626	0.387792	0.956716	1	1687	tags=23%, list=22%, signal=29%	-1.01626
REACTOME_REGULATION_OF_MRNA_STABILITY_BY_PROTEINS_THAT_BIND_AU_RICH_ELEMENTS		66	0.277968	1.01391	0.430799	0.964434	1	1354	tags=23%, list=17%, signal=27%	-1.01391
MISSIAGLIA_REGULATED_BY_METHYLATION_UP		47	0.299	1.01361	0.44246	0.964121	1	906	tags=15%, list=12%, signal=17%	-1.01361
BLANCO_MELO_BRONCHIAL_EPITHELIAL_CELLS_INFLUENZA_A_DEL_NS1_INFECTION_UP		183	0.237323	1.01303	0.429961	0.964957	1	455	tags=9%, list=6%, signal=10%	-1.01303
REACTOME_TERMINATION_OF_TRANSLESION_DNA_SYNTHESIS		18	0.369108	1.013	0.462	0.963549	1	1613	tags=28%, list=21%, signal=35%	-1.013
BROWNE_HCMV_INFECTION_1HR_DN		99	0.256602	1.01282	0.424955	0.962747	1	1565	tags=26%, list=20%, signal=32%	-1.01282
HINATA_NFKB_TARGETS_FIBROBLAST_UP		38	0.306832	1.01264	0.426168	0.96194	1	707	tags=16%, list=9%, signal=17%	-1.01264
LOPES_METHYLATED_IN_COLON_CANCER_DN		15	0.384092	1.01253	0.433594	0.960851	1	1272	tags=33%, list=16%, signal=40%	-1.01253
ZHAN_MULTIPLE_MYELOMA_HP_DN		23	0.345774	1.01244	0.43254	0.959732	1	2179	tags=43%, list=28%, signal=60%	-1.01244
DARWICHE_PAPILLOMA_RISK_HIGH_DN		86	0.264702	1.01186	0.418	0.960475	1	1480	tags=23%, list=19%, signal=28%	-1.01186
REACTOME_TRANSLATION_OF_SARSCOV2_STRUCTURAL_PROTEINS		30	0.327325	1.01106	0.424951	0.961952	1	1321	tags=27%, list=17%, signal=32%	-1.01106
CORRE_MULTIPLE_MYELOMA_DN		24	0.33577	1.01099	0.432075	0.960718	1	587	tags=25%, list=8%, signal=27%	-1.01099
SOTIRIOU_BREAST_CANCER_GRADE_1_VS_3_UP		53	0.285071	1.01091	0.436293	0.959587	1	869	tags=19%, list=11%, signal=21%	-1.01091
REACTOME_PEPTIDE_HORMONE_METABOLISM		37	0.311912	1.00994	0.438525	0.961817	1	1672	tags=30%, list=21%, signal=38%	-1.00994
KEGG_CELL_CYCLE		43	0.30013	1.00961	0.434185	0.961573	1	1046	tags=21%, list=13%, signal=24%	-1.00961
VANTVEER_BREAST_CANCER_METASTASIS_DN		54	0.290753	1.00915	0.425963	0.961899	1	1792	tags=37%, list=23%, signal=48%	-1.00915
ENK_UV_RESPONSE_EPIDERMIS_UP		154	0.240404	1.00899	0.431862	0.961054	1	1651	tags=25%, list=21%, signal=31%	-1.00899
REACTOME_TRANSPORT_OF_SMALL_MOLECULES		340	0.221142	1.00789	0.411347	0.963655	1	1457	tags=21%, list=19%, signal=24%	-1.00789
WP_DEVELOPMENT_OF_URETERIC_COLLECTION_SYSTEM		18	0.36506	1.00767	0.450397	0.962952	1	1435	tags=39%, list=18%, signal=48%	-1.00767
RAO_BOUND_BY_SALL4_ISOFORM_B		240	0.228073	1.00766	0.430631	0.961542	1	1389	tags=19%, list=18%, signal=23%	-1.00766
CHARAFE_BREAST_CANCER_LUMINAL_VS_MESENCHYMAL_UP		174	0.234934	1.00744	0.423146	0.960896	1	1062	tags=15%, list=14%, signal=17%	-1.00744
PID_ATM_PATHWAY		17	0.373997	1.00716	0.447014	0.960511	1	523	tags=18%, list=7%, signal=19%	-1.00716
DAVICIONI_TARGETS_OF_PAX_FOXO1_FUSIONS_UP		118	0.252696	1.00706	0.428309	0.959428	1	866	tags=17%, list=11%, signal=19%	-1.00706
KRIGE_RESPONSE_TO_TOSEDOSTAT_24HR_UP		334	0.220437	1.0065	0.425829	0.960125	1	1681	tags=24%, list=22%, signal=29%	-1.0065
MARSON_BOUND_BY_E2F4_UNSTIMULATED		313	0.220533	1.006	0.434545	0.960604	1	1350	tags=19%, list=17%, signal=23%	-1.006
BILD_MYC_ONCOGENIC_SIGNATURE		98	0.25783	1.00568	0.448276	0.960392	1	1237	tags=21%, list=16%, signal=25%	-1.00568
REACTOME_COPI_DEPENDENT_GOLGI_TO_ER_RETROGRADE_TRAFFIC		42	0.299033	1.00483	0.439306	0.962264	1	1410	tags=24%, list=18%, signal=29%	-1.00483
MARSON_FOXP3_TARGETS_DN		20	0.358685	1.00363	0.475915	0.96524	1	1128	tags=30%, list=14%, signal=35%	-1.00363
RAMALHO_STEMNESS_UP		128	0.247243	1.00339	0.441176	0.964712	1	1650	tags=27%, list=21%, signal=34%	-1.00339
GOTTWEIN_TARGETS_OF_KSHV_MIR_K12_11		28	0.321341	1.00308	0.476768	0.96441	1	1094	tags=18%, list=14%, signal=21%	-1.00308
WP_CELL_CYCLE		40	0.299644	1.00284	0.439759	0.963902	1	1046	tags=20%, list=13%, signal=23%	-1.00284
LIU_NASOPHARYNGEAL_CARCINOMA		38	0.306177	1.00106	0.461538	0.969082	1	1498	tags=32%, list=19%, signal=39%	-1.00106
VANTVEER_BREAST_CANCER_METASTASIS_UP		23	0.339937	1.00068	0.435052	0.969099	1	901	tags=17%, list=12%, signal=20%	-1.00068
GLASS_IGF2BP1_CLIP_TARGETS_KNOCKDOWN_DN		62	0.276117	1.00058	0.45488	0.968041	1	1373	tags=23%, list=18%, signal=27%	-1.00058
BURTON_ADIPOGENESIS_PEAK_AT_24HR		18	0.356661	1.00006	0.468809	0.968562	1	1571	tags=28%, list=20%, signal=35%	-1.00006
KEGG_NEUROTROPHIN_SIGNALING_PATHWAY		63	0.279371	0.999955	0.450943	0.967494	1	2283	tags=41%, list=29%, signal=58%	-0.999955
RODRIGUES_THYROID_CARCINOMA_ANAPLASTIC_UP		383	0.217364	0.999632	0.466302	0.967176	1	1806	tags=26%, list=23%, signal=32%	-0.999632
PASQUALUCCI_LYMPHOMA_BY_GC_STAGE_UP		149	0.239661	0.998829	0.451311	0.968734	1	832	tags=14%, list=11%, signal=15%	-0.998829
HOELZEL_NF1_TARGETS_UP		56	0.28463	0.998767	0.45509	0.967548	1	1437	tags=30%, list=18%, signal=37%	-0.998767
DESERT_PERIVENOUS_HEPATOCELLULAR_CARCINOMA_SUBCLASS_UP		91	0.259777	0.998632	0.435453	0.966654	1	1737	tags=26%, list=22%, signal=34%	-0.998632
REACTOME_CELL_CYCLE		319	0.220235	0.998598	0.478821	0.965374	1	1374	tags=21%, list=18%, signal=24%	-0.998598
WOOD_EBV_EBNA1_TARGETS_DN		27	0.329417	0.998347	0.441406	0.964886	1	1484	tags=30%, list=19%, signal=36%	-0.998347
KRIGE_RESPONSE_TO_TOSEDOSTAT_6HR_UP		445	0.211947	0.998216	0.462478	0.963976	1	1681	tags=25%, list=22%, signal=30%	-0.998216
PID_RAS_PATHWAY		18	0.362444	0.997493	0.44227	0.965279	1	594	tags=17%, list=8%, signal=18%	-0.997493
LIAN_LIPA_TARGETS_6M		18	0.369061	0.997206	0.444008	0.964925	1	51	tags=11%, list=1%, signal=11%	-0.997206
JIANG_HYPOXIA_CANCER		39	0.306864	0.996899	0.439583	0.964598	1	2149	tags=38%, list=28%, signal=53%	-0.996899
LIM_MAMMARY_LUMINAL_PROGENITOR_UP		19	0.350178	0.995882	0.481336	0.967041	1	992	tags=26%, list=13%, signal=30%	-0.995882
KERLEY_RESPONSE_TO_CISPLATIN_UP		16	0.370131	0.995775	0.482625	0.966029	1	832	tags=25%, list=11%, signal=28%	-0.995775
WP_AMPACTIVATED_PROTEIN_KINASE_SIGNALING		37	0.303377	0.995729	0.424419	0.964781	1	2390	tags=38%, list=31%, signal=54%	-0.995729
PID_P75_NTR_PATHWAY		38	0.302102	0.995728	0.426229	0.963371	1	831	tags=18%, list=11%, signal=21%	-0.995728
LEE_LIVER_CANCER_SURVIVAL_UP		71	0.265366	0.995635	0.436	0.962319	1	830	tags=15%, list=11%, signal=17%	-0.995635
REACTOME_SYNTHESIS_OF_PA		20	0.359594	0.995604	0.475746	0.961006	1	2067	tags=35%, list=26%, signal=47%	-0.995604
REACTOME_SIGNALING_BY_INTERLEUKINS		195	0.232919	0.995378	0.435897	0.960489	1	1390	tags=21%, list=18%, signal=25%	-0.995378
PID_CD8_TCR_PATHWAY		23	0.341728	0.994673	0.454936	0.961665	1	2248	tags=48%, list=29%, signal=67%	-0.994673
PID_E2F_PATHWAY		25	0.332516	0.994278	0.427481	0.961792	1	1736	tags=40%, list=22%, signal=51%	-0.994278
LEE_RECENT_THYMIC_EMIGRANT		106	0.252186	0.993089	0.452594	0.964877	1	1752	tags=29%, list=22%, signal=37%	-0.993089
NAKAJIMA_MAST_CELL		19	0.362352	0.992905	0.468284	0.964103	1	2262	tags=53%, list=29%, signal=74%	-0.992905
ZHU_CMV_24_HR_UP		44	0.295412	0.992568	0.493482	0.964004	1	1354	tags=25%, list=17%, signal=30%	-0.992568
SENGUPTA_NASOPHARYNGEAL_CARCINOMA_WITH_LMP1_UP		187	0.231477	0.992274	0.472924	0.963734	1	1319	tags=20%, list=17%, signal=23%	-0.992274
SESTO_RESPONSE_TO_UV_C8		42	0.293834	0.992196	0.448276	0.962595	1	2220	tags=36%, list=28%, signal=50%	-0.992196
WP_EGFEGFR_SIGNALING_PATHWAY		106	0.250431	0.991856	0.478664	0.962528	1	2706	tags=46%, list=35%, signal=70%	-0.991856
ZHENG_FOXP3_TARGETS_IN_THYMUS_UP		99	0.250275	0.991506	0.464427	0.96245	1	2226	tags=36%, list=29%, signal=50%	-0.991506
REACTOME_PHASE_I_FUNCTIONALIZATION_OF_COMPOUNDS		36	0.306548	0.990913	0.447266	0.963231	1	1304	tags=25%, list=17%, signal=30%	-0.990913
KEGG_TYROSINE_METABOLISM		17	0.360603	0.989993	0.447937	0.965234	1	1451	tags=35%, list=19%, signal=43%	-0.989993
WP_BLADDER_CANCER		15	0.377777	0.988295	0.476923	0.970155	1	2553	tags=60%, list=33%, signal=89%	-0.988295
REACTOME_NUCLEOTIDE_EXCISION_REPAIR		74	0.271482	0.988107	0.485876	0.969459	1	1613	tags=28%, list=21%, signal=35%	-0.988107
BROWNE_HCMV_INFECTION_4HR_DN		104	0.249389	0.987958	0.482692	0.968632	1	1004	tags=17%, list=13%, signal=20%	-0.987958
REACTOME_ARACHIDONIC_ACID_METABOLISM		21	0.346624	0.987252	0.454361	0.96993	1	1948	tags=38%, list=25%, signal=51%	-0.987252
PID_FOXO_PATHWAY		20	0.345844	0.986679	0.470954	0.970656	1	1269	tags=35%, list=16%, signal=42%	-0.986679
HESS_TARGETS_OF_HOXA9_AND_MEIS1_UP		44	0.291197	0.986387	0.463551	0.970369	1	2003	tags=34%, list=26%, signal=46%	-0.986387
PID_TCR_PATHWAY		30	0.318795	0.986151	0.461686	0.969899	1	2316	tags=50%, list=30%, signal=71%	-0.986151
REACTOME_METABOLISM_OF_FAT_SOLUBLE_VITAMINS		25	0.334472	0.985916	0.464844	0.969473	1	1928	tags=40%, list=25%, signal=53%	-0.985916
BONOME_OVARIAN_CANCER_POOR_SURVIVAL_UP		24	0.331815	0.985793	0.465909	0.968541	1	1779	tags=38%, list=23%, signal=48%	-0.985793
WONG_MITOCHONDRIA_GENE_MODULE		170	0.231276	0.984909	0.483516	0.970393	1	2106	tags=31%, list=27%, signal=42%	-0.984909
SAKAI_TUMOR_INFILTRATING_MONOCYTES_DN		50	0.284965	0.984666	0.488844	0.969872	1	1094	tags=18%, list=14%, signal=21%	-0.984666
WP_ONECARBON_METABOLISM_AND_RELATED_PATHWAYS		30	0.310432	0.984515	0.448473	0.969101	1	850	tags=17%, list=11%, signal=19%	-0.984515
REACTOME_NEUTROPHIL_DEGRANULATION		248	0.223606	0.984284	0.503597	0.968574	1	1569	tags=23%, list=20%, signal=28%	-0.984284
REACTOME_RESPIRATORY_ELECTRON_TRANSPORT		82	0.257692	0.983938	0.484314	0.968483	1	1592	tags=22%, list=20%, signal=27%	-0.983938
PIONTEK_PKD1_TARGETS_UP		15	0.379468	0.983381	0.476289	0.969148	1	703	tags=20%, list=9%, signal=22%	-0.983381
REACTOME_CHONDROITIN_SULFATE_DERMATAN_SULFATE_METABOLISM		25	0.332712	0.982491	0.482558	0.971072	1	1381	tags=28%, list=18%, signal=34%	-0.982491
WP_TRANSSULFURATION_ONECARBON_METABOLISM_AND_RELATED_PATHWAYS		40	0.294427	0.982326	0.481188	0.970331	1	850	tags=15%, list=11%, signal=17%	-0.982326
WP_REGULATORY_CIRCUITS_OF_THE_STAT3_SIGNALING_PATHWAY		30	0.316857	0.982067	0.483932	0.969931	1	1958	tags=37%, list=25%, signal=49%	-0.982067
SIG_INSULIN_RECEPTOR_PATHWAY_IN_CARDIAC_MYOCYTES		26	0.322276	0.98189	0.488636	0.969185	1	2110	tags=42%, list=27%, signal=58%	-0.98189
REACTOME_INTRA_GOLGI_AND_RETROGRADE_GOLGI_TO_ER_TRAFFIC		119	0.243568	0.981407	0.507519	0.969546	1	1332	tags=21%, list=17%, signal=25%	-0.981407
GAZDA_DIAMOND_BLACKFAN_ANEMIA_PROGENITOR_DN		44	0.293531	0.981306	0.478764	0.968551	1	1660	tags=30%, list=21%, signal=37%	-0.981306
WP_PYRIMIDINE_METABOLISM		50	0.280271	0.980853	0.486538	0.968868	1	2441	tags=40%, list=31%, signal=58%	-0.980853
REACTOME_ACTIVATION_OF_GENE_EXPRESSION_BY_SREBF_SREBP		30	0.310454	0.980802	0.479769	0.967702	1	379	tags=13%, list=5%, signal=14%	-0.980802
GROSS_HYPOXIA_VIA_HIF1A_UP		50	0.284726	0.980439	0.494163	0.967733	1	1301	tags=20%, list=17%, signal=24%	-0.980439
GALLUZZI_PERMEABILIZE_MITOCHONDRIA		23	0.337704	0.979886	0.494318	0.968344	1	695	tags=22%, list=9%, signal=24%	-0.979886
GRAESSMANN_APOPTOSIS_BY_SERUM_DEPRIVATION_UP		231	0.222897	0.979746	0.517986	0.96754	1	1227	tags=18%, list=16%, signal=20%	-0.979746
BONOME_OVARIAN_CANCER_POOR_SURVIVAL_DN		15	0.375178	0.979378	0.46988	0.967496	1	408	tags=20%, list=5%, signal=21%	-0.979378
BIOCARTA_MAPK_PATHWAY		42	0.298726	0.978788	0.480519	0.968287	1	2283	tags=38%, list=29%, signal=54%	-0.978788
PARK_HSC_MARKERS		25	0.326154	0.978758	0.477407	0.967052	1	507	tags=20%, list=7%, signal=21%	-0.978758
DARWICHE_SQUAMOUS_CELL_CARCINOMA_DN		85	0.260348	0.978743	0.503759	0.965779	1	1591	tags=25%, list=20%, signal=31%	-0.978743
WEST_ADRENOCORTICAL_TUMOR_UP		167	0.231398	0.978495	0.521401	0.965344	1	1956	tags=33%, list=25%, signal=43%	-0.978495
YEGNASUBRAMANIAN_PROSTATE_CANCER		49	0.28514	0.97754	0.471374	0.967369	1	1132	tags=22%, list=15%, signal=26%	-0.97754
LIAO_HAVE_SOX4_BINDING_SITES		24	0.329999	0.977491	0.461078	0.966226	1	519	tags=17%, list=7%, signal=18%	-0.977491
WALLACE_PROSTATE_CANCER_RACE_DN		41	0.295123	0.976704	0.484375	0.967694	1	1392	tags=22%, list=18%, signal=27%	-0.976704
ALTEMEIER_RESPONSE_TO_LPS_WITH_MECHANICAL_VENTILATION		26	0.327558	0.976329	0.468085	0.967759	1	684	tags=19%, list=9%, signal=21%	-0.976329
DUTERTRE_ESTRADIOL_RESPONSE_24HR_UP		94	0.252721	0.976096	0.495183	0.967278	1	1654	tags=27%, list=21%, signal=33%	-0.976096
WP_PURINE_METABOLISM_AND_RELATED_DISORDERS		18	0.352636	0.976001	0.481409	0.966291	1	2109	tags=44%, list=27%, signal=61%	-0.976001
PETRETTO_CARDIAC_HYPERTROPHY		15	0.36581	0.975714	0.489879	0.966011	1	363	tags=13%, list=5%, signal=14%	-0.975714
GEORGES_CELL_CYCLE_MIR192_TARGETS		32	0.307517	0.975473	0.482625	0.965594	1	1274	tags=31%, list=16%, signal=37%	-0.975473
REACTOME_M_PHASE		208	0.224874	0.975406	0.52583	0.964496	1	1372	tags=23%, list=18%, signal=27%	-0.975406
LEE_LIVER_CANCER_CIPROFIBRATE_UP		26	0.330535	0.974859	0.480237	0.96513	1	739	tags=23%, list=9%, signal=25%	-0.974859
FOSTER_KDM1A_TARGETS_DN		104	0.244172	0.974818	0.534579	0.963971	1	721	tags=13%, list=9%, signal=15%	-0.974818
JOHNSTONE_PARVB_TARGETS_2_DN		199	0.22759	0.973903	0.525394	0.965984	1	2131	tags=35%, list=27%, signal=46%	-0.973903
REACTOME_REGULATION_OF_TNFR1_SIGNALING		21	0.341962	0.973725	0.492063	0.965327	1	1322	tags=33%, list=17%, signal=40%	-0.973725
WP_TYPE_I_COLLAGEN_SYNTHESIS_IN_THE_CONTEXT_OF_OSTEOGENESIS_IMPERFECTA		16	0.357594	0.973676	0.488417	0.964202	1	245	tags=19%, list=3%, signal=19%	-0.973676
SCIAN_INVERSED_TARGETS_OF_TP53_AND_TP73_DN		17	0.360878	0.973251	0.487666	0.964428	1	1689	tags=41%, list=22%, signal=52%	-0.973251
DURCHDEWALD_SKIN_CARCINOGENESIS_UP		34	0.305559	0.973163	0.496241	0.963483	1	383	tags=9%, list=5%, signal=9%	-0.973163
REACTOME_SIGNALING_BY_ALK		17	0.356028	0.972588	0.474849	0.964294	1	1221	tags=35%, list=16%, signal=42%	-0.972588
MULLIGHAN_MLL_SIGNATURE_1_UP		193	0.225297	0.971292	0.524064	0.967591	1	1535	tags=24%, list=20%, signal=29%	-0.971292
REACTOME_MITOCHONDRIAL_CALCIUM_ION_TRANSPORT		17	0.358406	0.971209	0.501094	0.966595	1	2533	tags=53%, list=32%, signal=78%	-0.971209
ZHOU_INFLAMMATORY_RESPONSE_LIVE_DN		161	0.230645	0.9705	0.50738	0.967827	1	1652	tags=24%, list=21%, signal=30%	-0.9705
BUYTAERT_PHOTODYNAMIC_THERAPY_STRESS_UP		404	0.208219	0.96998	0.55877	0.96835	1	1332	tags=20%, list=17%, signal=22%	-0.96998
SARRIO_EPITHELIAL_MESENCHYMAL_TRANSITION_UP		58	0.276078	0.969921	0.502924	0.967246	1	770	tags=17%, list=10%, signal=19%	-0.969921
JOHANSSON_GLIOMAGENESIS_BY_PDGFB_UP		31	0.306856	0.969302	0.511111	0.968099	1	683	tags=23%, list=9%, signal=25%	-0.969302
NAKAMURA_TUMOR_ZONE_PERIPHERAL_VS_CENTRAL_UP		138	0.237199	0.968673	0.53211	0.969007	1	940	tags=17%, list=12%, signal=19%	-0.968673
TSUNODA_CISPLATIN_RESISTANCE_DN		16	0.364268	0.968636	0.503006	0.967857	1	365	tags=13%, list=5%, signal=13%	-0.968636
WP_EUKARYOTIC_TRANSCRIPTION_INITIATION		34	0.305179	0.967231	0.501908	0.971649	1	450	tags=12%, list=6%, signal=12%	-0.967231
CAFFAREL_RESPONSE_TO_THC_24HR_5_DN		25	0.32275	0.966854	0.51341	0.971737	1	1651	tags=32%, list=21%, signal=40%	-0.966854
BIOCARTA_VEGF_PATHWAY		20	0.344852	0.966773	0.509842	0.970746	1	831	tags=20%, list=11%, signal=22%	-0.966773
FOURNIER_ACINAR_DEVELOPMENT_LATE_2		161	0.229659	0.966584	0.551845	0.970171	1	2055	tags=34%, list=26%, signal=45%	-0.966584
NAKAYAMA_SOFT_TISSUE_TUMORS_PCA1_DN		33	0.306478	0.965945	0.516315	0.971195	1	363	tags=9%, list=5%, signal=9%	-0.965945
BURTON_ADIPOGENESIS_8		44	0.289278	0.96573	0.496094	0.970689	1	569	tags=14%, list=7%, signal=15%	-0.96573
WP_INTERLEUKIN1_IL1_STRUCTURAL_PATHWAY		29	0.316998	0.965619	0.501006	0.969759	1	2706	tags=55%, list=35%, signal=84%	-0.965619
NOUSHMEHR_GBM_SILENCED_BY_METHYLATION		17	0.349393	0.964491	0.521277	0.972604	1	1857	tags=47%, list=24%, signal=62%	-0.964491
LINDGREN_BLADDER_CANCER_CLUSTER_2A_DN		66	0.262425	0.964207	0.518095	0.972308	1	687	tags=12%, list=9%, signal=13%	-0.964207
CHIARADONNA_NEOPLASTIC_TRANSFORMATION_CDC25_DN		70	0.264349	0.964115	0.523979	0.971384	1	1480	tags=26%, list=19%, signal=31%	-0.964115
SHETH_LIVER_CANCER_VS_TXNIP_LOSS_PAM3		29	0.307111	0.96385	0.49503	0.971029	1	877	tags=21%, list=11%, signal=23%	-0.96385
ROSTY_CERVICAL_CANCER_PROLIFERATION_CLUSTER		42	0.285444	0.963727	0.496078	0.970169	1	1129	tags=21%, list=14%, signal=25%	-0.963727
REACTOME_ION_CHANNEL_TRANSPORT		78	0.257406	0.962928	0.505791	0.97181	1	1508	tags=24%, list=19%, signal=30%	-0.962928
CAIRO_HEPATOBLASTOMA_CLASSES_UP		403	0.207884	0.962784	0.615094	0.971087	1	2149	tags=32%, list=28%, signal=42%	-0.962784
MARTINEZ_RESPONSE_TO_TRABECTEDIN_DN		179	0.225523	0.962526	0.553506	0.970748	1	987	tags=17%, list=13%, signal=19%	-0.962526
REACTOME_EPH_EPHRIN_MEDIATED_REPULSION_OF_CELLS		24	0.329735	0.962141	0.524096	0.970824	1	1532	tags=25%, list=20%, signal=31%	-0.962141
WP_NUCLEOTIDE_EXCISION_REPAIR_IN_XERODERMA_PIGMENTOSUM		38	0.296684	0.961802	0.514735	0.970758	1	1613	tags=29%, list=21%, signal=36%	-0.961802
WP_CHOLESTEROL_METABOLISM_WITH_BLOCH_AND_KANDUTSCHRUSSELL_PATHWAYS		31	0.306829	0.961596	0.533605	0.970228	1	864	tags=19%, list=11%, signal=22%	-0.961596
FARMER_BREAST_CANCER_APOCRINE_VS_LUMINAL		168	0.227328	0.961353	0.556586	0.969819	1	1454	tags=21%, list=19%, signal=26%	-0.961353
ZHAN_LATE_DIFFERENTIATION_GENES_UP		21	0.337046	0.960194	0.497992	0.972676	1	1	tags=5%, list=0%, signal=5%	-0.960194
BRUECKNER_TARGETS_OF_MIRLET7A3_DN		34	0.299565	0.958968	0.528736	0.975798	1	1711	tags=32%, list=22%, signal=41%	-0.958968
SEIDEN_ONCOGENESIS_BY_MET		60	0.265413	0.958775	0.492424	0.975195	1	1942	tags=30%, list=25%, signal=40%	-0.958775
WEIGEL_OXIDATIVE_STRESS_BY_HNE_AND_H2O2		18	0.352212	0.958382	0.506098	0.97534	1	1627	tags=44%, list=21%, signal=56%	-0.958382
WP_NAD_METABOLISM_IN_ONCOGENEINDUCED_SENESCENCE_AND_MITOCHONDRIAL_DYSFUNCTIONASSOCIATED_SENESCENCE		15	0.366466	0.957622	0.53373	0.976681	1	627	tags=20%, list=8%, signal=22%	-0.957622
REACTOME_NUCLEOTIDE_BINDING_DOMAIN_LEUCINE_RICH_REPEAT_CONTAINING_RECEPTOR_NLR_SIGNALING_PATHWAYS		28	0.311576	0.956709	0.503937	0.978695	1	427	tags=14%, list=5%, signal=15%	-0.956709
WP_2586_ARYL_HYDROCARBON_RECEPTOR_PATHWAY		19	0.340238	0.956586	0.504132	0.977892	1	1414	tags=32%, list=18%, signal=38%	-0.956586
LIANG_HEMATOPOIESIS_STEM_CELL_NUMBER_SMALL_VS_HUGE_DN		16	0.356166	0.95653	0.516505	0.976854	1	2272	tags=56%, list=29%, signal=79%	-0.95653
SASAKI_ADULT_T_CELL_LEUKEMIA		76	0.259663	0.956312	0.530769	0.976343	1	1674	tags=30%, list=21%, signal=38%	-0.956312
REACTOME_SPHINGOLIPID_METABOLISM		49	0.275636	0.956184	0.535294	0.975546	1	976	tags=16%, list=13%, signal=19%	-0.956184
DITTMER_PTHLH_TARGETS_UP		68	0.257938	0.955761	0.533597	0.975782	1	1760	tags=35%, list=23%, signal=45%	-0.955761
REACTOME_RHO_GTPASES_ACTIVATE_FORMINS		63	0.261883	0.95509	0.534709	0.976864	1	1847	tags=35%, list=24%, signal=45%	-0.95509
HIRSCH_CELLULAR_TRANSFORMATION_SIGNATURE_UP		115	0.238231	0.954149	0.560714	0.978871	1	836	tags=15%, list=11%, signal=16%	-0.954149
KEGG_MTOR_SIGNALING_PATHWAY		30	0.312384	0.953256	0.526022	0.980771	1	2236	tags=43%, list=29%, signal=61%	-0.953256
REACTOME_PKMTS_METHYLATE_HISTONE_LYSINES		27	0.311144	0.952249	0.558935	0.983074	1	193	tags=7%, list=2%, signal=8%	-0.952249
MILI_PSEUDOPODIA_HAPTOTAXIS_UP		333	0.209024	0.952149	0.59646	0.982178	1	1823	tags=25%, list=23%, signal=32%	-0.952149
NUYTTEN_NIPP1_TARGETS_DN		438	0.203148	0.951155	0.662544	0.984371	1	853	tags=13%, list=11%, signal=13%	-0.951155
GOLDRATH_HOMEOSTATIC_PROLIFERATION		94	0.242786	0.950824	0.551724	0.984263	1	1963	tags=30%, list=25%, signal=39%	-0.950824
PROVENZANI_METASTASIS_DN		79	0.251799	0.95006	0.554286	0.985633	1	789	tags=14%, list=10%, signal=15%	-0.95006
KORKOLA_SEMINOMA_UP		22	0.332102	0.949587	0.537698	0.98604	1	368	tags=18%, list=5%, signal=19%	-0.949587
NUYTTEN_EZH2_TARGETS_UP		489	0.199456	0.94918	0.667808	0.98627	1	1577	tags=22%, list=20%, signal=25%	-0.94918
GUO_HEX_TARGETS_UP		45	0.273982	0.948755	0.533203	0.986548	1	1474	tags=22%, list=19%, signal=27%	-0.948755
REACTOME_THE_CITRIC_ACID_TCA_CYCLE_AND_RESPIRATORY_ELECTRON_TRANSPORT		125	0.236353	0.948508	0.563071	0.986131	1	2220	tags=31%, list=28%, signal=43%	-0.948508
JOHANSSON_GLIOMAGENESIS_BY_PDGFB_DN		17	0.360533	0.94846	0.508911	0.985052	1	481	tags=18%, list=6%, signal=19%	-0.94846
PID_REELIN_PATHWAY		21	0.333951	0.948451	0.542339	0.983848	1	2072	tags=48%, list=27%, signal=65%	-0.948451
BERENJENO_TRANSFORMED_BY_RHOA_UP		286	0.212979	0.948296	0.618081	0.983167	1	1744	tags=26%, list=22%, signal=33%	-0.948296
REACTOME_HDR_THROUGH_HOMOLOGOUS_RECOMBINATION_HRR		22	0.331106	0.947333	0.507752	0.985332	1	354	tags=14%, list=5%, signal=14%	-0.947333
BILANGES_RAPAMYCIN_SENSITIVE_VIA_TSC1_AND_TSC2		49	0.273048	0.947034	0.537678	0.985092	1	716	tags=14%, list=9%, signal=16%	-0.947034
REACTOME_DISEASES_OF_DNA_REPAIR		19	0.348744	0.946331	0.532819	0.986292	1	354	tags=16%, list=5%, signal=16%	-0.946331
MARSON_BOUND_BY_FOXP3_STIMULATED		479	0.19997	0.945563	0.666078	0.987685	1	1644	tags=22%, list=21%, signal=26%	-0.945563
CHNG_MULTIPLE_MYELOMA_HYPERPLOID_UP		41	0.285793	0.945266	0.524085	0.98753	1	1081	tags=20%, list=14%, signal=23%	-0.945266
YAGI_AML_SURVIVAL		67	0.254797	0.944697	0.543893	0.988291	1	1121	tags=18%, list=14%, signal=21%	-0.944697
REACTOME_SENESCENCE_ASSOCIATED_SECRETORY_PHENOTYPE_SASP		23	0.324182	0.943445	0.54672	0.991335	1	1046	tags=22%, list=13%, signal=25%	-0.943445
BENPORATH_MYC_MAX_TARGETS		464	0.20044	0.943217	0.67193	0.990937	1	1946	tags=28%, list=25%, signal=35%	-0.943217
CHEMNITZ_RESPONSE_TO_PROSTAGLANDIN_E2_UP		68	0.256171	0.942312	0.546642	0.992786	1	891	tags=16%, list=11%, signal=18%	-0.942312
PURBEY_TARGETS_OF_CTBP1_AND_SATB1_DN		81	0.247913	0.942248	0.578544	0.99176	1	1074	tags=19%, list=14%, signal=21%	-0.942248
LINDGREN_BLADDER_CANCER_CLUSTER_1_UP		61	0.26314	0.942173	0.569767	0.990787	1	2254	tags=36%, list=29%, signal=50%	-0.942173
KEGG_CHRONIC_MYELOID_LEUKEMIA		35	0.291006	0.941755	0.525424	0.991005	1	1373	tags=26%, list=18%, signal=31%	-0.941755
DOANE_BREAST_CANCER_ESR1_UP		36	0.289166	0.941688	0.547059	0.990011	1	877	tags=19%, list=11%, signal=22%	-0.941688
WP_MODULATORS_OF_TCR_SIGNALING_AND_T_CELL_ACTIVATION		23	0.324174	0.940081	0.543689	0.994386	1	909	tags=22%, list=12%, signal=25%	-0.940081
BLANCO_MELO_COVID19_SARS_COV_2_INFECTION_A594_CELLS_UP		20	0.333982	0.938848	0.529297	0.99748	1	1776	tags=35%, list=23%, signal=45%	-0.938848
REACTOME_DUAL_INCISION_IN_GG_NER		24	0.314746	0.938729	0.539623	0.996685	1	1613	tags=29%, list=21%, signal=37%	-0.938729
WP_ETHANOL_EFFECTS_ON_HISTONE_MODIFICATIONS		20	0.335854	0.938197	0.533582	0.997246	1	1168	tags=30%, list=15%, signal=35%	-0.938197
BONOME_OVARIAN_CANCER_SURVIVAL_OPTIMAL_DEBULKING		117	0.236521	0.937087	0.600753	0.999846	1	1644	tags=23%, list=21%, signal=29%	-0.937087
AGUIRRE_PANCREATIC_CANCER_COPY_NUMBER_DN		132	0.229751	0.936732	0.597353	0.999854	1	939	tags=17%, list=12%, signal=19%	-0.936732
YAGI_AML_WITH_INV_16_TRANSLOCATION		219	0.215995	0.935478	0.641651	1	1	1219	tags=19%, list=16%, signal=22%	-0.935478
REACTOME_HEPARAN_SULFATE_HEPARIN_HS_GAG_METABOLISM		29	0.297853	0.935405	0.528958	1	1	1381	tags=31%, list=18%, signal=38%	-0.935405
WENG_POR_TARGETS_LIVER_UP		21	0.330646	0.935221	0.541267	1	1	496	tags=19%, list=6%, signal=20%	-0.935221
GRADE_COLON_AND_RECTAL_CANCER_UP		180	0.220919	0.935113	0.639854	1	1	1313	tags=18%, list=17%, signal=21%	-0.935113
DUTERTRE_ESTRADIOL_RESPONSE_6HR_DN		30	0.294933	0.934569	0.564	1	1	1271	tags=20%, list=16%, signal=24%	-0.934569
MANNE_COVID19_COMBINED_COHORT_VS_HEALTHY_DONOR_PLATELETS_UP		60	0.263252	0.933698	0.56778	1	1	1552	tags=27%, list=20%, signal=33%	-0.933698
REACTOME_PEROXISOMAL_PROTEIN_IMPORT		42	0.278022	0.93343	0.552894	1	1	1073	tags=26%, list=14%, signal=30%	-0.93343
ZHAN_V2_LATE_DIFFERENTIATION_GENES		23	0.315416	0.932525	0.551859	1	1	1416	tags=22%, list=18%, signal=26%	-0.932525
WEI_MIR34A_TARGETS		87	0.242269	0.931235	0.624746	1	1	496	tags=10%, list=6%, signal=11%	-0.931235
KANNAN_TP53_TARGETS_UP		23	0.313909	0.931184	0.560327	1	1	1428	tags=30%, list=18%, signal=37%	-0.931184
WAMUNYOKOLI_OVARIAN_CANCER_GRADES_1_2_UP		65	0.254097	0.931145	0.592	1	1	845	tags=14%, list=11%, signal=15%	-0.931145
FERRANDO_T_ALL_WITH_MLL_ENL_FUSION_DN		48	0.269408	0.929764	0.57529	1	1	2220	tags=46%, list=28%, signal=64%	-0.929764
ODONNELL_TARGETS_OF_MYC_AND_TFRC_UP		23	0.311085	0.92945	0.564516	1	1	1170	tags=17%, list=15%, signal=20%	-0.92945
OSMAN_BLADDER_CANCER_UP		233	0.208419	0.929317	0.678505	1	1	1950	tags=31%, list=25%, signal=40%	-0.929317
REACTOME_DEVELOPMENTAL_BIOLOGY		478	0.19663	0.928539	0.721223	1	1	1687	tags=22%, list=22%, signal=26%	-0.928539
BLANCO_MELO_COVID19_SARS_COV_2_POS_PATIENT_LUNG_TISSUE_DN		95	0.237608	0.928132	0.596085	1	1	1322	tags=22%, list=17%, signal=26%	-0.928132
NELSON_RESPONSE_TO_ANDROGEN_UP		41	0.272766	0.927945	0.564972	1	1	522	tags=12%, list=7%, signal=13%	-0.927945
REACTOME_PLASMA_LIPOPROTEIN_ASSEMBLY_REMODELING_AND_CLEARANCE		34	0.287678	0.927942	0.568273	1	1	1570	tags=29%, list=20%, signal=37%	-0.927942
HOFFMANN_LARGE_TO_SMALL_PRE_BII_LYMPHOCYTE_UP		57	0.256487	0.927846	0.577651	1	1	1700	tags=28%, list=22%, signal=36%	-0.927846
WIERENGA_PML_INTERACTOME		30	0.302896	0.927405	0.568702	1	1	679	tags=13%, list=9%, signal=15%	-0.927405
SANSOM_WNT_PATHWAY_REQUIRE_MYC		19	0.331931	0.927333	0.58427	1	1	2367	tags=47%, list=30%, signal=68%	-0.927333
HORIUCHI_WTAP_TARGETS_DN		153	0.21938	0.923797	0.654206	1	1	1538	tags=24%, list=20%, signal=29%	-0.923797
KYNG_DNA_DAMAGE_BY_4NQO		19	0.327209	0.923663	0.565302	1	1	1248	tags=21%, list=16%, signal=25%	-0.923663
TONKS_TARGETS_OF_RUNX1_RUNX1T1_FUSION_ERYTHROCYTE_UP		63	0.257087	0.923631	0.60396	1	1	954	tags=16%, list=12%, signal=18%	-0.923631
WP_NONSMALL_CELL_LUNG_CANCER		36	0.282893	0.92231	0.576998	1	1	2234	tags=42%, list=29%, signal=58%	-0.92231
PID_PDGFRB_PATHWAY		84	0.244483	0.920985	0.630975	1	1	2316	tags=40%, list=30%, signal=57%	-0.920985
GENTILE_RESPONSE_CLUSTER_D3		24	0.309356	0.920733	0.558994	1	1	1461	tags=29%, list=19%, signal=36%	-0.920733
KAMMINGA_SENESCENCE		23	0.314601	0.920652	0.597222	1	1	394	tags=13%, list=5%, signal=14%	-0.920652
KAYO_AGING_MUSCLE_DN		73	0.24704	0.919675	0.609259	1	1	2302	tags=36%, list=30%, signal=50%	-0.919675
SCHAEFFER_PROSTATE_DEVELOPMENT_48HR_UP		169	0.220793	0.919403	0.666667	1	1	1339	tags=20%, list=17%, signal=24%	-0.919403
MOREAUX_B_LYMPHOCYTE_MATURATION_BY_TACI_DN		52	0.259049	0.919296	0.579848	1	1	805	tags=17%, list=10%, signal=19%	-0.919296
REACTOME_HS_GAG_BIOSYNTHESIS		15	0.344655	0.919058	0.549603	1	1	466	tags=20%, list=6%, signal=21%	-0.919058
WP_MITOCHONDRIAL_LONG_CHAIN_FATTY_ACID_BETAOXIDATION		15	0.354593	0.919041	0.548638	1	1	32	tags=7%, list=0%, signal=7%	-0.919041
IVANOVA_HEMATOPOIESIS_EARLY_PROGENITOR		270	0.204699	0.918556	0.712204	1	1	1495	tags=23%, list=19%, signal=27%	-0.918556
BONCI_TARGETS_OF_MIR15A_AND_MIR16_1		41	0.272447	0.918416	0.573308	1	1	1461	tags=24%, list=19%, signal=30%	-0.918416
REACTOME_CELLULAR_RESPONSE_TO_STARVATION		117	0.229928	0.918265	0.658716	1	1	1687	tags=26%, list=22%, signal=32%	-0.918265
WAMUNYOKOLI_OVARIAN_CANCER_LMP_DN		97	0.231485	0.918046	0.63308	1	1	1533	tags=26%, list=20%, signal=32%	-0.918046
GARGALOVIC_RESPONSE_TO_OXIDIZED_PHOSPHOLIPIDS_BLUE_UP		50	0.265081	0.918004	0.602851	1	1	1063	tags=22%, list=14%, signal=25%	-0.918004
KEGG_FATTY_ACID_METABOLISM		31	0.287567	0.917204	0.586207	1	1	1283	tags=19%, list=16%, signal=23%	-0.917204
REACTOME_NEGATIVE_REGULATION_OF_THE_PI3K_AKT_NETWORK		47	0.272195	0.917062	0.586538	1	1	2153	tags=38%, list=28%, signal=53%	-0.917062
ZHAN_MULTIPLE_MYELOMA_MF_UP		20	0.325763	0.91623	0.572874	1	1	1711	tags=40%, list=22%, signal=51%	-0.91623
RAY_TUMORIGENESIS_BY_ERBB2_CDC25A_UP		65	0.253935	0.915715	0.602823	1	1	1335	tags=25%, list=17%, signal=29%	-0.915715
TAKAO_RESPONSE_TO_UVB_RADIATION_UP		51	0.261992	0.915714	0.608782	1	1	2600	tags=49%, list=33%, signal=73%	-0.915714
LEE_CALORIE_RESTRICTION_MUSCLE_UP		20	0.32688	0.915563	0.580645	1	1	633	tags=20%, list=8%, signal=22%	-0.915563
BRUINS_UVC_RESPONSE_VIA_TP53_GROUP_B		211	0.210032	0.915495	0.699634	1	1	817	tags=10%, list=10%, signal=11%	-0.915495
REACTOME_MTOR_SIGNALLING		28	0.297338	0.914695	0.587771	1	1	2236	tags=43%, list=29%, signal=60%	-0.914695
CREIGHTON_ENDOCRINE_THERAPY_RESISTANCE_5		248	0.207319	0.914634	0.737132	1	1	1158	tags=18%, list=15%, signal=20%	-0.914634
THEILGAARD_NEUTROPHIL_AT_SKIN_WOUND_UP		29	0.298308	0.913865	0.606299	1	1	2377	tags=52%, list=30%, signal=74%	-0.913865
BRUINS_UVC_RESPONSE_VIA_TP53_GROUP_D		130	0.222741	0.912326	0.660886	1	1	984	tags=15%, list=13%, signal=16%	-0.912326
SANSOM_APC_TARGETS		85	0.234935	0.912299	0.633459	1	1	1008	tags=18%, list=13%, signal=20%	-0.912299
BURTON_ADIPOGENESIS_2		37	0.283078	0.912288	0.586916	1	1	1193	tags=27%, list=15%, signal=32%	-0.912288
DANG_MYC_TARGETS_UP		86	0.236253	0.912174	0.612205	1	1	1389	tags=21%, list=18%, signal=25%	-0.912174
REACTOME_FOXO_MEDIATED_TRANSCRIPTION		23	0.311387	0.911	0.555985	1	1	192	tags=13%, list=2%, signal=13%	-0.911
DIAZ_CHRONIC_MYELOGENOUS_LEUKEMIA_DN		42	0.27332	0.910952	0.610902	1	1	2209	tags=40%, list=28%, signal=56%	-0.910952
ZHOU_CELL_CYCLE_GENES_IN_IR_RESPONSE_6HR		22	0.3203	0.91082	0.589494	1	1	1837	tags=41%, list=24%, signal=53%	-0.91082
MASSARWEH_TAMOXIFEN_RESISTANCE_UP		264	0.204285	0.910495	0.73309	1	1	1009	tags=14%, list=13%, signal=16%	-0.910495
JINESH_BLEBBISHIELD_VS_LIVE_CONTROL_UP		140	0.221734	0.910351	0.673828	1	1	2100	tags=32%, list=27%, signal=43%	-0.910351
DACOSTA_UV_RESPONSE_VIA_ERCC3_COMMON_DN		287	0.202275	0.910194	0.754613	1	1	1466	tags=20%, list=19%, signal=23%	-0.910194
DAVICIONI_MOLECULAR_ARMS_VS_ERMS_UP		178	0.213988	0.909392	0.701658	1	1	1736	tags=26%, list=22%, signal=33%	-0.909392
REACTOME_TRANSLOCATION_OF_SLC2A4_GLUT4_TO_THE_PLASMA_MEMBRANE		31	0.28913	0.909174	0.59127	1	1	1672	tags=29%, list=21%, signal=37%	-0.909174
SHEDDEN_LUNG_CANCER_GOOD_SURVIVAL_A5		35	0.282609	0.9087	0.631579	1	1	1499	tags=29%, list=19%, signal=35%	-0.9087
BURTON_ADIPOGENESIS_4		32	0.288138	0.907991	0.586745	1	1	1726	tags=34%, list=22%, signal=44%	-0.907991
TORCHIA_TARGETS_OF_EWSR1_FLI1_FUSION_DN		147	0.218581	0.90774	0.70229	1	1	1451	tags=22%, list=19%, signal=27%	-0.90774
PID_PI3KCI_AKT_PATHWAY		18	0.34018	0.907633	0.585321	1	1	1468	tags=33%, list=19%, signal=41%	-0.907633
KEGG_PYRUVATE_METABOLISM		30	0.297941	0.907066	0.593688	1	1	2075	tags=33%, list=27%, signal=45%	-0.907066
BIOCARTA_PPARA_PATHWAY		26	0.298615	0.906636	0.636015	1	1	1007	tags=23%, list=13%, signal=26%	-0.906636
RHODES_CANCER_META_SIGNATURE		34	0.286658	0.905945	0.601533	1	1	1622	tags=26%, list=21%, signal=33%	-0.905945
HUMMEL_BURKITTS_LYMPHOMA_UP		21	0.320274	0.905659	0.587174	1	1	681	tags=19%, list=9%, signal=21%	-0.905659
MCBRYAN_PUBERTAL_TGFB1_TARGETS_DN		24	0.307269	0.905479	0.610204	1	1	1168	tags=29%, list=15%, signal=34%	-0.905479
MOLENAAR_TARGETS_OF_CCND1_AND_CDK4_UP		24	0.305904	0.905039	0.610236	1	1	2156	tags=38%, list=28%, signal=52%	-0.905039
MULLIGHAN_NPM1_MUTATED_SIGNATURE_1_DN		71	0.243894	0.90457	0.647059	1	1	1909	tags=30%, list=24%, signal=39%	-0.90457
UDAYAKUMAR_MED1_TARGETS_UP		88	0.234138	0.902921	0.684803	1	1	786	tags=17%, list=10%, signal=19%	-0.902921
NIKOLSKY_BREAST_CANCER_20Q11_AMPLICON		19	0.329498	0.902617	0.616142	1	1	2062	tags=47%, list=26%, signal=64%	-0.902617
ACEVEDO_METHYLATED_IN_LIVER_CANCER_DN		272	0.201601	0.901927	0.767986	1	1	1401	tags=22%, list=18%, signal=26%	-0.901927
ONKEN_UVEAL_MELANOMA_DN		318	0.197072	0.901802	0.788562	1	1	1662	tags=24%, list=21%, signal=30%	-0.901802
KEGG_T_CELL_RECEPTOR_SIGNALING_PATHWAY		41	0.268928	0.901773	0.631478	1	1	2507	tags=49%, list=32%, signal=72%	-0.901773
REACTOME_AMYLOID_FIBER_FORMATION		27	0.300152	0.90167	0.607004	1	1	1023	tags=19%, list=13%, signal=21%	-0.90167
KEGG_GLYCINE_SERINE_AND_THREONINE_METABOLISM		18	0.32098	0.901651	0.581749	1	1	739	tags=17%, list=9%, signal=18%	-0.901651
APPEL_IMATINIB_RESPONSE		23	0.311199	0.901242	0.585271	1	1	1858	tags=30%, list=24%, signal=40%	-0.901242
MARTORIATI_MDM4_TARGETS_FETAL_LIVER_UP		115	0.224208	0.901216	0.675229	1	1	1035	tags=17%, list=13%, signal=20%	-0.901216
REACTOME_CELLULAR_RESPONSES_TO_STIMULI		458	0.192211	0.901045	0.823529	1	1	1124	tags=15%, list=14%, signal=17%	-0.901045
REACTOME_SIGNALING_BY_PDGFR_IN_DISEASE		15	0.34662	0.900452	0.573222	1	1	831	tags=20%, list=11%, signal=22%	-0.900452
PID_BETA_CATENIN_NUC_PATHWAY		26	0.298311	0.900182	0.598826	1	1	1110	tags=19%, list=14%, signal=22%	-0.900182
DAZARD_RESPONSE_TO_UV_SCC_UP		53	0.256932	0.900121	0.644981	1	1	2643	tags=45%, list=34%, signal=68%	-0.900121
REACTOME_CHROMATIN_MODIFYING_ENZYMES		127	0.223486	0.899757	0.706994	1	1	1033	tags=14%, list=13%, signal=16%	-0.899757
KEGG_GLYCEROLIPID_METABOLISM		29	0.285628	0.899178	0.606178	1	1	476	tags=17%, list=6%, signal=18%	-0.899178
KEGG_MELANOMA		23	0.305929	0.898495	0.592445	1	1	2234	tags=52%, list=29%, signal=73%	-0.898495
REACTOME_DISORDERS_OF_TRANSMEMBRANE_TRANSPORTERS		103	0.227291	0.898401	0.674286	1	1	1654	tags=23%, list=21%, signal=29%	-0.898401
KEGG_ARGININE_AND_PROLINE_METABOLISM		34	0.284921	0.897282	0.644135	1	1	739	tags=15%, list=9%, signal=16%	-0.897282
FIGUEROA_AML_METHYLATION_CLUSTER_7_UP		50	0.253112	0.897169	0.656134	1	1	825	tags=16%, list=11%, signal=18%	-0.897169
REACTOME_COMPLEX_I_BIOGENESIS		48	0.259146	0.896547	0.638298	1	1	1592	tags=21%, list=20%, signal=26%	-0.896547
PANGAS_TUMOR_SUPPRESSION_BY_SMAD1_AND_SMAD5_DN		69	0.241148	0.896187	0.647706	1	1	1957	tags=36%, list=25%, signal=48%	-0.896187
REACTOME_G_ALPHA_12_13_SIGNALLING_EVENTS		45	0.265271	0.896077	0.645544	1	1	1627	tags=22%, list=21%, signal=28%	-0.896077
JAERVINEN_AMPLIFIED_IN_LARYNGEAL_CANCER		22	0.312163	0.895617	0.614173	1	1	2033	tags=45%, list=26%, signal=61%	-0.895617
WP_RAC1PAK1P38MMP2_PATHWAY		38	0.272433	0.895454	0.617591	1	1	2316	tags=39%, list=30%, signal=56%	-0.895454
REACTOME_SENSORY_PERCEPTION		80	0.234861	0.895404	0.670498	1	1	1937	tags=33%, list=25%, signal=43%	-0.895404
APRELIKOVA_BRCA1_TARGETS		28	0.291625	0.895312	0.613779	1	1	1301	tags=25%, list=17%, signal=30%	-0.895312
DAIRKEE_CANCER_PRONE_RESPONSE_BPA		34	0.279561	0.895231	0.617591	1	1	2220	tags=35%, list=28%, signal=49%	-0.895231
TERAO_AOX4_TARGETS_HG_UP		15	0.337053	0.89471	0.571134	1	1	1986	tags=47%, list=25%, signal=62%	-0.89471
PID_HDAC_CLASSI_PATHWAY		39	0.270266	0.89381	0.624288	1	1	1206	tags=23%, list=15%, signal=27%	-0.89381
WP_7Q1123_COPY_NUMBER_VARIATION_SYNDROME		57	0.254515	0.893495	0.642436	1	1	1301	tags=26%, list=17%, signal=31%	-0.893495
DORSAM_HOXA9_TARGETS_UP		22	0.309921	0.893243	0.614203	1	1	1619	tags=27%, list=21%, signal=34%	-0.893243
MENSE_HYPOXIA_UP		37	0.27346	0.892996	0.620623	1	1	602	tags=16%, list=8%, signal=17%	-0.892996
DARWICHE_SKIN_TUMOR_PROMOTER_DN		89	0.232845	0.892574	0.700587	1	1	1232	tags=19%, list=16%, signal=22%	-0.892574
ZHAN_MULTIPLE_MYELOMA_MS_UP		25	0.307578	0.891999	0.624765	1	1	1104	tags=24%, list=14%, signal=28%	-0.891999
WP_PROXIMAL_TUBULE_TRANSPORT		21	0.312711	0.891723	0.624242	1	1	701	tags=19%, list=9%, signal=21%	-0.891723
GERHOLD_ADIPOGENESIS_UP		27	0.296018	0.891244	0.624266	1	1	1991	tags=30%, list=26%, signal=40%	-0.891244
REACTOME_DISEASES_ASSOCIATED_WITH_GLYCOSAMINOGLYCAN_METABOLISM		23	0.296456	0.890582	0.612576	1	1	1928	tags=39%, list=25%, signal=52%	-0.890582
PID_P38_ALPHA_BETA_PATHWAY		16	0.330779	0.889629	0.597806	1	1	2078	tags=38%, list=27%, signal=51%	-0.889629
REACTOME_TP53_REGULATES_TRANSCRIPTION_OF_CELL_DEATH_GENES		17	0.326402	0.889528	0.608696	1	1	987	tags=35%, list=13%, signal=40%	-0.889528
WP_GENES_RELATED_TO_PRIMARY_CILIUM_DEVELOPMENT_BASED_ON_CRISPR		49	0.255062	0.889312	0.669231	1	1	1100	tags=20%, list=14%, signal=24%	-0.889312
REACTOME_TRANSCRIPTION_COUPLED_NUCLEOTIDE_EXCISION_REPAIR_TC_NER		58	0.250931	0.888827	0.668539	1	1	1613	tags=28%, list=21%, signal=35%	-0.888827
REACTOME_NOD1_2_SIGNALING_PATHWAY		17	0.332805	0.888462	0.622222	1	1	427	tags=18%, list=5%, signal=19%	-0.888462
REACTOME_GENE_AND_PROTEIN_EXPRESSION_BY_JAK_STAT_SIGNALING_AFTER_INTERLEUKIN_12_STIMULATION		23	0.301812	0.888186	0.617021	1	1	1628	tags=30%, list=21%, signal=38%	-0.888186
SCHLOSSER_SERUM_RESPONSE_DN		435	0.191073	0.887951	0.853974	1	1	1484	tags=19%, list=19%, signal=23%	-0.887951
LOCKWOOD_AMPLIFIED_IN_LUNG_CANCER		128	0.216151	0.886625	0.743542	1	1	1078	tags=18%, list=14%, signal=21%	-0.886625
MORI_PLASMA_CELL_UP		34	0.273874	0.885434	0.626642	1	1	1565	tags=26%, list=20%, signal=33%	-0.885434
REACTOME_CYTOKINE_SIGNALING_IN_IMMUNE_SYSTEM		285	0.195311	0.885351	0.822018	1	1	1945	tags=26%, list=25%, signal=33%	-0.885351
BIOCARTA_MET_PATHWAY		23	0.302225	0.885046	0.620202	1	1	2234	tags=48%, list=29%, signal=67%	-0.885046
PID_PI3KCI_PATHWAY		24	0.305422	0.884702	0.624758	1	1	2461	tags=63%, list=32%, signal=91%	-0.884702
REACTOME_PROTEIN_UBIQUITINATION		40	0.270425	0.884419	0.639692	1	1	2650	tags=48%, list=34%, signal=72%	-0.884419
FISCHER_DIRECT_P53_TARGETS_META_ANALYSIS		143	0.207882	0.884191	0.74635	1	1	1401	tags=21%, list=18%, signal=25%	-0.884191
MORI_PRE_BI_LYMPHOCYTE_UP		25	0.295808	0.883577	0.629126	1	1	822	tags=20%, list=11%, signal=22%	-0.883577
ANDERSEN_LIVER_CANCER_KRT19_DN		32	0.27957	0.883569	0.634429	1	1	1168	tags=25%, list=15%, signal=29%	-0.883569
REACTOME_SARS_COV_INFECTIONS		240	0.199201	0.883369	0.812616	1	1	1750	tags=24%, list=22%, signal=30%	-0.883369
WP_METHIONINE_DE_NOVO_AND_SALVAGE_PATHWAY		15	0.331385	0.882316	0.617476	1	1	536	tags=13%, list=7%, signal=14%	-0.882316
KUMAR_TARGETS_OF_MLL_AF9_FUSION		181	0.205698	0.881782	0.781193	1	1	1399	tags=19%, list=18%, signal=22%	-0.881782
KEGG_PROPANOATE_METABOLISM		25	0.290528	0.88148	0.659735	1	1	1500	tags=24%, list=19%, signal=30%	-0.88148
WARTERS_RESPONSE_TO_IR_SKIN		26	0.293122	0.881167	0.628231	1	1	1577	tags=35%, list=20%, signal=43%	-0.881167
REACTOME_COPI_MEDIATED_ANTEROGRADE_TRANSPORT		57	0.247961	0.88035	0.661355	1	1	2495	tags=39%, list=32%, signal=56%	-0.88035
WP_MIRNAS_INVOLVEMENT_IN_THE_IMMUNE_RESPONSE_IN_SEPSIS		17	0.321868	0.878915	0.629482	1	1	427	tags=18%, list=5%, signal=19%	-0.878915
REACTOME_SARS_COV_2_INFECTION		185	0.204266	0.878592	0.764168	1	1	1750	tags=24%, list=22%, signal=31%	-0.878592
MULLIGHAN_MLL_SIGNATURE_2_DN		135	0.213235	0.87854	0.750491	1	1	1846	tags=27%, list=24%, signal=34%	-0.87854
WP_TCELL_RECEPTOR_SIGNALING_PATHWAY		35	0.270823	0.878481	0.659708	1	1	2739	tags=57%, list=35%, signal=88%	-0.878481
LIU_CMYB_TARGETS_UP		76	0.231235	0.878442	0.709193	1	1	1716	tags=28%, list=22%, signal=35%	-0.878442
CHARAFE_BREAST_CANCER_BASAL_VS_MESENCHYMAL_UP		26	0.292408	0.878441	0.635458	1	1	1041	tags=23%, list=13%, signal=27%	-0.878441
NEMETH_INFLAMMATORY_RESPONSE_LPS_UP		34	0.273103	0.87779	0.645793	1	1	893	tags=18%, list=11%, signal=20%	-0.87779
MATSUDA_NATURAL_KILLER_DIFFERENTIATION		211	0.201365	0.877416	0.792661	1	1	2028	tags=29%, list=26%, signal=38%	-0.877416
NAKAMURA_METASTASIS_MODEL_DN		18	0.327316	0.877076	0.610338	1	1	2111	tags=39%, list=27%, signal=53%	-0.877076
CHEN_NEUROBLASTOMA_COPY_NUMBER_GAINS		26	0.289607	0.876419	0.637827	1	1	1358	tags=31%, list=17%, signal=37%	-0.876419
SHETH_LIVER_CANCER_VS_TXNIP_LOSS_PAM4		137	0.213615	0.87618	0.751371	1	1	1615	tags=25%, list=21%, signal=31%	-0.87618
BIOCARTA_ERAD_PATHWAY		15	0.331478	0.875172	0.632937	1	1	913	tags=13%, list=12%, signal=15%	-0.875172
KYNG_DNA_DAMAGE_DN		86	0.228436	0.875144	0.722936	1	1	1887	tags=28%, list=24%, signal=36%	-0.875144
DANG_MYC_TARGETS_DN		17	0.319828	0.874881	0.592803	1	1	684	tags=18%, list=9%, signal=19%	-0.874881
REACTOME_GLYCOLYSIS		48	0.252314	0.874808	0.677298	1	1	1909	tags=33%, list=24%, signal=44%	-0.874808
GALINDO_IMMUNE_RESPONSE_TO_ENTEROTOXIN		26	0.288265	0.874681	0.636364	1	1	412	tags=12%, list=5%, signal=12%	-0.874681
REACTOME_REGULATION_OF_PLK1_ACTIVITY_AT_G2_M_TRANSITION		39	0.260883	0.874282	0.68797	1	1	1097	tags=26%, list=14%, signal=30%	-0.874282
MACAEVA_PBMC_RESPONSE_TO_IR		39	0.266209	0.874158	0.662083	1	1	2119	tags=33%, list=27%, signal=46%	-0.874158
GRAESSMANN_RESPONSE_TO_MC_AND_DOXORUBICIN_DN		458	0.1858	0.872302	0.912281	1	1	1633	tags=22%, list=21%, signal=26%	-0.872302
PID_SYNDECAN_2_PATHWAY		20	0.314897	0.872246	0.636183	1	1	2234	tags=40%, list=29%, signal=56%	-0.872246
RIZKI_TUMOR_INVASIVENESS_2D_UP		35	0.271512	0.871517	0.662698	1	1	1611	tags=29%, list=21%, signal=36%	-0.871517
HARRIS_BRAIN_CANCER_PROGENITORS		19	0.301663	0.871365	0.614035	1	1	435	tags=16%, list=6%, signal=17%	-0.871365
PID_RHOA_REG_PATHWAY		30	0.279172	0.871098	0.67767	1	1	1621	tags=33%, list=21%, signal=42%	-0.871098
KRIEG_KDM3A_TARGETS_NOT_HYPOXIA		111	0.218536	0.8707	0.763964	1	1	1854	tags=26%, list=24%, signal=34%	-0.8707
BYSTRYKH_HEMATOPOIESIS_STEM_CELL_QTL_CIS		79	0.22986	0.870489	0.730189	1	1	1627	tags=25%, list=21%, signal=32%	-0.870489
PHONG_TNF_RESPONSE_VIA_P38_PARTIAL		61	0.240527	0.870292	0.688805	1	1	833	tags=15%, list=11%, signal=16%	-0.870292
BROWNE_HCMV_INFECTION_14HR_UP		73	0.237765	0.869835	0.712747	1	1	1148	tags=18%, list=15%, signal=21%	-0.869835
IZADPANAH_STEM_CELL_ADIPOSE_VS_BONE_UP		61	0.23866	0.869325	0.724609	1	1	1711	tags=30%, list=22%, signal=38%	-0.869325
SMITH_TERT_TARGETS_DN		51	0.250644	0.868619	0.66348	1	1	734	tags=16%, list=9%, signal=17%	-0.868619
LEE_CALORIE_RESTRICTION_NEOCORTEX_DN		36	0.264427	0.868422	0.678295	1	1	261	tags=11%, list=3%, signal=11%	-0.868422
BLUM_RESPONSE_TO_SALIRASIB_UP		140	0.212403	0.867107	0.806273	1	1	1017	tags=15%, list=13%, signal=17%	-0.867107
PID_TNF_PATHWAY		34	0.272016	0.865819	0.678571	1	1	1982	tags=38%, list=25%, signal=51%	-0.865819
ZHAN_V1_LATE_DIFFERENTIATION_GENES_UP		24	0.294549	0.865439	0.658586	1	1	1523	tags=33%, list=20%, signal=41%	-0.865439
SAMOLS_TARGETS_OF_KHSV_MIRNAS_DN		25	0.289933	0.865061	0.685484	1	1	806	tags=20%, list=10%, signal=22%	-0.865061
FEVR_CTNNB1_TARGETS_UP		282	0.192388	0.864804	0.882042	1	1	817	tags=11%, list=10%, signal=11%	-0.864804
BASAKI_YBX1_TARGETS_UP		108	0.217898	0.86476	0.759842	1	1	1736	tags=27%, list=22%, signal=34%	-0.86476
BURTON_ADIPOGENESIS_PEAK_AT_8HR		20	0.307403	0.864093	0.687375	1	1	2539	tags=50%, list=33%, signal=74%	-0.864093
DEURIG_T_CELL_PROLYMPHOCYTIC_LEUKEMIA_UP		170	0.205627	0.863512	0.826255	1	1	753	tags=11%, list=10%, signal=12%	-0.863512
PID_ALPHA_SYNUCLEIN_PATHWAY		22	0.293127	0.862938	0.652977	1	1	2683	tags=64%, list=34%, signal=97%	-0.862938
MOHANKUMAR_HOXA1_TARGETS_UP		237	0.194679	0.862227	0.849091	1	1	1847	tags=28%, list=24%, signal=35%	-0.862227
REACTOME_UPTAKE_AND_ACTIONS_OF_BACTERIAL_TOXINS		17	0.316747	0.862227	0.662188	1	1	368	tags=12%, list=5%, signal=12%	-0.862227
SUNG_METASTASIS_STROMA_DN		21	0.301098	0.861619	0.657895	1	1	1129	tags=29%, list=14%, signal=33%	-0.861619
MCCLUNG_DELTA_FOSB_TARGETS_8WK		36	0.270405	0.861529	0.696498	1	1	762	tags=17%, list=10%, signal=18%	-0.861529
ZHAN_MULTIPLE_MYELOMA_CD1_VS_CD2_UP		24	0.293829	0.861448	0.658777	1	1	988	tags=21%, list=13%, signal=24%	-0.861448
ZHAN_VARIABLE_EARLY_DIFFERENTIATION_GENES_DN		18	0.316964	0.861322	0.668724	1	1	2491	tags=44%, list=32%, signal=65%	-0.861322
REACTOME_NETRIN_1_SIGNALING		32	0.275119	0.861047	0.698039	1	1	1202	tags=22%, list=15%, signal=26%	-0.861047
REACTOME_ANCHORING_OF_THE_BASAL_BODY_TO_THE_PLASMA_MEMBRANE		41	0.258291	0.859875	0.714876	1	1	1328	tags=27%, list=17%, signal=32%	-0.859875
REACTOME_GLUTATHIONE_CONJUGATION		20	0.298421	0.859799	0.645669	1	1	1980	tags=40%, list=25%, signal=53%	-0.859799
SWEET_KRAS_TARGETS_DN		33	0.270812	0.859402	0.69962	1	1	1542	tags=27%, list=20%, signal=34%	-0.859402
FLECHNER_BIOPSY_KIDNEY_TRANSPLANT_REJECTED_VS_OK_DN		348	0.186642	0.858831	0.913762	1	1	1364	tags=17%, list=17%, signal=20%	-0.858831
MIKKELSEN_NPC_HCP_WITH_H3K4ME3_AND_H3K27ME3		72	0.232735	0.858516	0.738636	1	1	1881	tags=29%, list=24%, signal=38%	-0.858516
TAKEDA_TARGETS_OF_NUP98_HOXA9_FUSION_6HR_DN		18	0.312197	0.858303	0.669323	1	1	871	tags=22%, list=11%, signal=25%	-0.858303
ZHOU_INFLAMMATORY_RESPONSE_FIMA_DN		96	0.219735	0.857745	0.792279	1	1	1448	tags=20%, list=19%, signal=24%	-0.857745
WP_ATM_SIGNALING_PATHWAY		15	0.315669	0.85726	0.678068	1	1	1913	tags=33%, list=25%, signal=44%	-0.85726
WP_LIPID_METABOLISM_PATHWAY		16	0.317027	0.856286	0.660118	1	1	2449	tags=44%, list=31%, signal=64%	-0.856286
LUI_TARGETS_OF_PAX8_PPARG_FUSION		21	0.299122	0.855722	0.693676	1	1	2594	tags=52%, list=33%, signal=78%	-0.855722
GHANDHI_BYSTANDER_IRRADIATION_UP		17	0.309263	0.855685	0.682672	1	1	1626	tags=35%, list=21%, signal=44%	-0.855685
REACTOME_EFFECTS_OF_PIP2_HYDROLYSIS		17	0.311354	0.855104	0.669291	1	1	1202	tags=24%, list=15%, signal=28%	-0.855104
KYNG_DNA_DAMAGE_BY_4NQO_OR_UV		26	0.281244	0.855045	0.676635	1	1	946	tags=12%, list=12%, signal=13%	-0.855045
WP_MET_IN_TYPE_1_PAPILLARY_RENAL_CELL_CARCINOMA		34	0.264329	0.854467	0.674286	1	1	1373	tags=29%, list=18%, signal=36%	-0.854467
BENITEZ_GBM_PROTEASOME_INHIBITION_RESPONSE		19	0.303542	0.853982	0.689379	1	1	147	tags=11%, list=2%, signal=11%	-0.853982
BIOCARTA_KERATINOCYTE_PATHWAY		20	0.301077	0.853678	0.66129	1	1	2665	tags=55%, list=34%, signal=83%	-0.853678
MARTINEZ_RESPONSE_TO_TRABECTEDIN		30	0.270121	0.853639	0.69186	1	1	171	tags=7%, list=2%, signal=7%	-0.853639
GAVIN_FOXP3_TARGETS_CLUSTER_T4		50	0.246576	0.853345	0.724074	1	1	1607	tags=26%, list=21%, signal=33%	-0.853345
KLEIN_PRIMARY_EFFUSION_LYMPHOMA_UP		28	0.28298	0.85285	0.66996	1	1	2056	tags=43%, list=26%, signal=58%	-0.85285
KIM_MYC_AMPLIFICATION_TARGETS_UP		120	0.217355	0.85263	0.798851	1	1	1728	tags=27%, list=22%, signal=34%	-0.85263
HOQUE_METHYLATED_IN_CANCER		21	0.298671	0.852615	0.663327	1	1	354	tags=14%, list=5%, signal=15%	-0.852615
BOYAULT_LIVER_CANCER_SUBCLASS_G2		19	0.302795	0.852042	0.669261	1	1	1277	tags=26%, list=16%, signal=31%	-0.852042
ANDERSEN_CHOLANGIOCARCINOMA_CLASS2		32	0.270674	0.852027	0.688091	1	1	741	tags=16%, list=10%, signal=17%	-0.852027
YAO_TEMPORAL_RESPONSE_TO_PROGESTERONE_CLUSTER_7		48	0.248244	0.851845	0.737475	1	1	1205	tags=21%, list=15%, signal=24%	-0.851845
HELLER_HDAC_TARGETS_SILENCED_BY_METHYLATION_UP		207	0.19718	0.851518	0.857955	1	1	817	tags=12%, list=10%, signal=13%	-0.851518
MCCLUNG_CREB1_TARGETS_DN		28	0.276736	0.85089	0.701863	1	1	1453	tags=25%, list=19%, signal=31%	-0.85089
SCHLOSSER_MYC_AND_SERUM_RESPONSE_SYNERGY		23	0.294803	0.850725	0.675351	1	1	757	tags=22%, list=10%, signal=24%	-0.850725
KYNG_DNA_DAMAGE_BY_GAMMA_RADIATION		34	0.26422	0.850723	0.714008	1	1	1017	tags=24%, list=13%, signal=27%	-0.850723
GENTILE_UV_RESPONSE_CLUSTER_D5		19	0.308303	0.850708	0.688259	1	1	1111	tags=32%, list=14%, signal=37%	-0.850708
BYSTRYKH_HEMATOPOIESIS_STEM_CELL_QTL_TRANS		401	0.182542	0.850092	0.948435	1	1	1373	tags=18%, list=18%, signal=20%	-0.850092
SHETH_LIVER_CANCER_VS_TXNIP_LOSS_PAM6		23	0.296966	0.849211	0.663424	1	1	1176	tags=22%, list=15%, signal=26%	-0.849211
REACTOME_INTERLEUKIN_12_SIGNALING		27	0.274938	0.848943	0.699597	1	1	1628	tags=30%, list=21%, signal=37%	-0.848943
SANSOM_APC_MYC_TARGETS		130	0.204931	0.847823	0.817505	1	1	1511	tags=20%, list=19%, signal=24%	-0.847823
REACTOME_N_GLYCAN_TRIMMING_IN_THE_ER_AND_CALNEXIN_CALRETICULIN_CYCLE		21	0.294988	0.84762	0.692898	1	1	2457	tags=43%, list=32%, signal=62%	-0.84762
REACTOME_SARS_COV_2_HOST_INTERACTIONS		133	0.207278	0.847265	0.799625	1	1	1750	tags=24%, list=22%, signal=30%	-0.847265
PID_TGFBR_PATHWAY		34	0.272094	0.846768	0.701195	1	1	1148	tags=21%, list=15%, signal=24%	-0.846768
KEGG_PARKINSONS_DISEASE		77	0.223482	0.846506	0.793358	1	1	1595	tags=23%, list=20%, signal=29%	-0.846506
WP_ELECTRON_TRANSPORT_CHAIN_OXPHOS_SYSTEM_IN_MITOCHONDRIA		61	0.233413	0.846088	0.766478	1	1	1592	tags=21%, list=20%, signal=27%	-0.846088
HATADA_METHYLATED_IN_LUNG_CANCER_UP		129	0.206937	0.845711	0.839844	1	1	1893	tags=29%, list=24%, signal=38%	-0.845711
KOHOUTEK_CCNT1_TARGETS		29	0.270533	0.845119	0.726562	1	1	907	tags=17%, list=12%, signal=19%	-0.845119
PUIFFE_INVASION_INHIBITED_BY_ASCITES_DN		84	0.222036	0.845095	0.766284	1	1	1153	tags=18%, list=15%, signal=21%	-0.845095
WHITEHURST_PACLITAXEL_SENSITIVITY		19	0.3023	0.844377	0.7	1	1	1772	tags=32%, list=23%, signal=41%	-0.844377
MIKKELSEN_MEF_HCP_WITH_H3K27ME3		191	0.195075	0.842535	0.888889	1	1	1530	tags=22%, list=20%, signal=27%	-0.842535
FRIDMAN_SENESCENCE_UP		38	0.253745	0.842407	0.728175	1	1	1311	tags=18%, list=17%, signal=22%	-0.842407
TOOKER_GEMCITABINE_RESISTANCE_UP		43	0.251301	0.840156	0.72973	1	1	1638	tags=28%, list=21%, signal=35%	-0.840156
FALVELLA_SMOKERS_WITH_LUNG_CANCER		41	0.254519	0.839864	0.740816	1	1	1484	tags=20%, list=19%, signal=24%	-0.839864
BIOCARTA_PYK2_PATHWAY		16	0.31253	0.839574	0.674464	1	1	2856	tags=50%, list=37%, signal=79%	-0.839574
AZARE_STAT3_TARGETS		16	0.32506	0.838535	0.689218	1	1	833	tags=19%, list=11%, signal=21%	-0.838535
REACTOME_FORMATION_OF_TC_NER_PRE_INCISION_COMPLEX		41	0.250009	0.838455	0.73224	1	1	1490	tags=27%, list=19%, signal=33%	-0.838455
MEISSNER_NPC_HCP_WITH_H3K27ME3		16	0.317077	0.838076	0.675944	1	1	741	tags=19%, list=10%, signal=21%	-0.838076
WP_MICROTUBULE_CYTOSKELETON_REGULATION		27	0.274083	0.837938	0.714022	1	1	1393	tags=22%, list=18%, signal=27%	-0.837938
MATTIOLI_MGUS_VS_PCL		67	0.232457	0.837717	0.790514	1	1	1298	tags=19%, list=17%, signal=23%	-0.837717
WP_MIRNA_REGULATION_OF_DNA_DAMAGE_RESPONSE		23	0.283081	0.837376	0.705882	1	1	1461	tags=30%, list=19%, signal=37%	-0.837376
KEGG_PROGESTERONE_MEDIATED_OOCYTE_MATURATION		36	0.255337	0.83725	0.743243	1	1	2321	tags=39%, list=30%, signal=55%	-0.83725
KEGG_PEROXISOME		58	0.235456	0.837113	0.77821	1	1	1073	tags=21%, list=14%, signal=24%	-0.837113
REACTOME_IRE1ALPHA_ACTIVATES_CHAPERONES		30	0.265738	0.83709	0.703922	1	1	1418	tags=23%, list=18%, signal=28%	-0.83709
BORCZUK_MALIGNANT_MESOTHELIOMA_UP		200	0.193009	0.837049	0.898113	1	1	1623	tags=22%, list=21%, signal=26%	-0.837049
SU_TESTIS		23	0.291613	0.836769	0.72093	1	1	975	tags=17%, list=13%, signal=20%	-0.836769
TAKEDA_TARGETS_OF_NUP98_HOXA9_FUSION_16D_DN		36	0.253384	0.835826	0.750473	1	1	1457	tags=22%, list=19%, signal=27%	-0.835826
KYNG_ENVIRONMENTAL_STRESS_RESPONSE_NOT_BY_4NQO_IN_WS		18	0.307059	0.835784	0.708758	1	1	753	tags=22%, list=10%, signal=25%	-0.835784
ZAMORA_NOS2_TARGETS_UP		27	0.275362	0.835338	0.717092	1	1	822	tags=19%, list=11%, signal=21%	-0.835338
JINESH_BLEBBISHIELD_TRANSFORMED_STEM_CELL_SPHERES_UP		76	0.223263	0.834221	0.78501	1	1	1193	tags=20%, list=15%, signal=23%	-0.834221
HINATA_NFKB_TARGETS_KERATINOCYTE_UP		27	0.270432	0.83383	0.715706	1	1	1336	tags=26%, list=17%, signal=31%	-0.83383
ROVERSI_GLIOMA_LOH_REGIONS		24	0.287383	0.833779	0.681564	1	1	1311	tags=33%, list=17%, signal=40%	-0.833779
REACTOME_INTRAFLAGELLAR_TRANSPORT		27	0.274023	0.833529	0.690702	1	1	788	tags=22%, list=10%, signal=25%	-0.833529
WP_WNT_SIGNALING_PATHWAY_AND_PLURIPOTENCY		36	0.261105	0.832848	0.734	1	1	1943	tags=36%, list=25%, signal=48%	-0.832848
KIM_MYCN_AMPLIFICATION_TARGETS_DN		48	0.23921	0.832829	0.760417	1	1	1716	tags=27%, list=22%, signal=35%	-0.832829
DING_LUNG_CANCER_EXPRESSION_BY_COPY_NUMBER		68	0.230038	0.832727	0.793651	1	1	1034	tags=16%, list=13%, signal=18%	-0.832727
MIYAGAWA_TARGETS_OF_EWSR1_ETS_FUSIONS_DN		86	0.214709	0.832274	0.809145	1	1	736	tags=12%, list=9%, signal=13%	-0.832274
WP_PPAR_SIGNALING_PATHWAY		33	0.261394	0.832219	0.71673	1	1	363	tags=9%, list=5%, signal=9%	-0.832219
KYNG_ENVIRONMENTAL_STRESS_RESPONSE_NOT_BY_GAMMA_IN_OLD		16	0.316751	0.832162	0.682879	1	1	2263	tags=50%, list=29%, signal=70%	-0.832162
WP_MAPK_CASCADE		20	0.293592	0.832151	0.706994	1	1	1910	tags=40%, list=24%, signal=53%	-0.832151
TORCHIA_TARGETS_OF_EWSR1_FLI1_FUSION_UP		129	0.204071	0.832138	0.853383	1	1	1526	tags=20%, list=20%, signal=25%	-0.832138
LEE_LIVER_CANCER_DENA_DN		28	0.266336	0.832115	0.757455	1	1	796	tags=14%, list=10%, signal=16%	-0.832115
REACTOME_RRNA_MODIFICATION_IN_THE_NUCLEUS_AND_CYTOSOL		49	0.236686	0.831062	0.796512	1	1	2384	tags=37%, list=31%, signal=53%	-0.831062
WP_TOLLLIKE_RECEPTOR_SIGNALING_RELATED_TO_MYD88		18	0.30591	0.830766	0.717647	1	1	1390	tags=22%, list=18%, signal=27%	-0.830766
REACTOME_TRANSPORT_OF_INORGANIC_CATIONS_ANIONS_AND_AMINO_ACIDS_OLIGOPEPTIDES		42	0.245955	0.830102	0.76834	1	1	637	tags=12%, list=8%, signal=13%	-0.830102
SILIGAN_BOUND_BY_EWS_FLT1_FUSION		22	0.284684	0.828665	0.71978	1	1	1358	tags=32%, list=17%, signal=38%	-0.828665
REACTOME_SIGNALING_BY_SCF_KIT		23	0.282494	0.828557	0.718623	1	1	2268	tags=52%, list=29%, signal=73%	-0.828557
BENPORATH_EED_TARGETS		311	0.182615	0.82764	0.930909	1	1	877	tags=12%, list=11%, signal=13%	-0.82764
KEGG_ETHER_LIPID_METABOLISM		18	0.297154	0.825802	0.71785	1	1	2683	tags=67%, list=34%, signal=101%	-0.825802
YAMAZAKI_TCEB3_TARGETS_DN		106	0.209531	0.825588	0.839844	1	1	2182	tags=30%, list=28%, signal=41%	-0.825588
HONMA_DOCETAXEL_RESISTANCE		25	0.279866	0.825397	0.709486	1	1	2877	tags=60%, list=37%, signal=95%	-0.825397
LEIN_PONS_MARKERS		41	0.247009	0.825387	0.756809	1	1	664	tags=12%, list=9%, signal=13%	-0.825387
BRUNO_HEMATOPOIESIS		30	0.2599	0.824439	0.743137	1	1	1041	tags=20%, list=13%, signal=23%	-0.824439
GRUETZMANN_PANCREATIC_CANCER_UP		199	0.191703	0.823351	0.896175	1	1	1606	tags=23%, list=21%, signal=28%	-0.823351
KEGG_GAP_JUNCTION		38	0.25206	0.823265	0.744681	1	1	1823	tags=29%, list=23%, signal=38%	-0.823265
REACTOME_TRAFFICKING_OF_AMPA_RECEPTORS		18	0.305719	0.822469	0.677606	1	1	2183	tags=39%, list=28%, signal=54%	-0.822469
RUIZ_TNC_TARGETS_DN		45	0.240001	0.822422	0.757798	1	1	1996	tags=36%, list=26%, signal=48%	-0.822422
RAMALHO_STEMNESS_DN		35	0.257985	0.822277	0.737143	1	1	1626	tags=20%, list=21%, signal=25%	-0.822277
PID_MYC_REPRESS_PATHWAY		30	0.264646	0.821952	0.733083	1	1	354	tags=13%, list=5%, signal=14%	-0.821952
WP_IL17_SIGNALING_PATHWAY		15	0.314918	0.82148	0.725572	1	1	831	tags=20%, list=11%, signal=22%	-0.82148
WP_DNA_DAMAGE_RESPONSE		23	0.283081	0.821295	0.70339	1	1	1461	tags=30%, list=19%, signal=37%	-0.821295
BILD_E2F3_ONCOGENIC_SIGNATURE		116	0.205471	0.82118	0.859316	1	1	833	tags=14%, list=11%, signal=15%	-0.82118
REACTOME_DISEASES_OF_CARBOHYDRATE_METABOLISM		17	0.300763	0.82013	0.695219	1	1	1514	tags=35%, list=19%, signal=44%	-0.82013
JI_RESPONSE_TO_FSH_DN		30	0.265642	0.81993	0.74502	1	1	1514	tags=27%, list=19%, signal=33%	-0.81993
VANTVEER_BREAST_CANCER_ESR1_UP		77	0.218419	0.819383	0.827515	1	1	1606	tags=22%, list=21%, signal=28%	-0.819383
AMIT_SERUM_RESPONSE_240_MCF10A		26	0.271444	0.819316	0.738337	1	1	832	tags=15%, list=11%, signal=17%	-0.819316
LIU_SOX4_TARGETS_DN		196	0.187463	0.81899	0.936782	1	1	880	tags=12%, list=11%, signal=13%	-0.81899
KEGG_BASAL_TRANSCRIPTION_FACTORS		25	0.273498	0.818599	0.741379	1	1	357	tags=8%, list=5%, signal=8%	-0.818599
KUMAR_PATHOGEN_LOAD_BY_MACROPHAGES		99	0.208073	0.818277	0.847423	1	1	1478	tags=20%, list=19%, signal=25%	-0.818277
FIGUEROA_AML_METHYLATION_CLUSTER_1_UP		49	0.231075	0.817928	0.805882	1	1	676	tags=14%, list=9%, signal=16%	-0.817928
AMUNDSON_RESPONSE_TO_ARSENITE		116	0.204499	0.816916	0.853846	1	1	1577	tags=22%, list=20%, signal=28%	-0.816916
WP_MITOCHONDRIAL_COMPLEX_I_ASSEMBLY_MODEL_OXPHOS_SYSTEM		46	0.239114	0.816695	0.786139	1	1	1592	tags=22%, list=20%, signal=27%	-0.816695
CHANDRAN_METASTASIS_DN		128	0.203531	0.81636	0.894539	1	1	587	tags=10%, list=8%, signal=11%	-0.81636
GROSS_HYPOXIA_VIA_ELK3_UP		108	0.207348	0.81635	0.871199	1	1	1200	tags=15%, list=15%, signal=17%	-0.81635
LEIN_LOCALIZED_TO_PROXIMAL_DENDRITES		24	0.272015	0.815832	0.761628	1	1	1170	tags=17%, list=15%, signal=20%	-0.815832
WP_HEPATOCYTE_GROWTH_FACTOR_RECEPTOR_SIGNALING		25	0.271056	0.815329	0.753937	1	1	1347	tags=28%, list=17%, signal=34%	-0.815329
RODWELL_AGING_KIDNEY_DN		87	0.213058	0.81488	0.850288	1	1	2556	tags=43%, list=33%, signal=63%	-0.81488
GRUETZMANN_PANCREATIC_CANCER_DN		103	0.206122	0.814661	0.884135	1	1	1469	tags=20%, list=19%, signal=25%	-0.814661
OUILLETTE_CLL_13Q14_DELETION_UP		38	0.24761	0.814082	0.789264	1	1	781	tags=16%, list=10%, signal=17%	-0.814082
WP_FERROPTOSIS		35	0.254103	0.813261	0.76938	1	1	881	tags=14%, list=11%, signal=16%	-0.813261
STEIN_ESRRA_TARGETS_RESPONSIVE_TO_ESTROGEN_DN		16	0.301181	0.812503	0.735955	1	1	1195	tags=25%, list=15%, signal=29%	-0.812503
KAUFFMANN_DNA_REPAIR_GENES		100	0.205595	0.812433	0.871795	1	1	822	tags=13%, list=11%, signal=14%	-0.812433
LIU_PROSTATE_CANCER_UP		47	0.236108	0.812204	0.80198	1	1	1662	tags=21%, list=21%, signal=27%	-0.812204
SHEN_SMARCA2_TARGETS_UP		303	0.180102	0.811927	0.967742	1	1	2135	tags=31%, list=27%, signal=41%	-0.811927
ALONSO_METASTASIS_EMT_UP		19	0.29036	0.811607	0.738956	1	1	1182	tags=16%, list=15%, signal=19%	-0.811607
LEE_LIVER_CANCER_SURVIVAL_DN		101	0.207078	0.809824	0.863139	1	1	1193	tags=17%, list=15%, signal=20%	-0.809824
FUJII_YBX1_TARGETS_DN		81	0.213684	0.809653	0.833333	1	1	1391	tags=20%, list=18%, signal=24%	-0.809653
TAKADA_GASTRIC_CANCER_COPY_NUMBER_DN		16	0.302117	0.80851	0.72167	1	1	2251	tags=38%, list=29%, signal=53%	-0.80851
REACTOME_DOWNSTREAM_SIGNAL_TRANSDUCTION		22	0.280203	0.806865	0.745968	1	1	2316	tags=45%, list=30%, signal=64%	-0.806865
WP_FATTY_ACID_BIOSYNTHESIS		15	0.309645	0.806761	0.735471	1	1	2927	tags=67%, list=38%, signal=107%	-0.806761
PID_GMCSF_PATHWAY		17	0.29788	0.806103	0.739479	1	1	831	tags=18%, list=11%, signal=20%	-0.806103
QI_HYPOXIA		59	0.227705	0.805841	0.841603	1	1	751	tags=15%, list=10%, signal=17%	-0.805841
REACTOME_TOLL_LIKE_RECEPTOR_CASCADES		86	0.214157	0.805369	0.834933	1	1	1943	tags=30%, list=25%, signal=40%	-0.805369
SCHRAETS_MLL_TARGETS_UP		18	0.295124	0.805328	0.723447	1	1	1904	tags=50%, list=24%, signal=66%	-0.805328
KEGG_STARCH_AND_SUCROSE_METABOLISM		17	0.291806	0.805309	0.748062	1	1	2746	tags=59%, list=35%, signal=91%	-0.805309
KEGG_RENAL_CELL_CARCINOMA		34	0.251294	0.805242	0.775	1	1	2234	tags=44%, list=29%, signal=62%	-0.805242
MULLIGAN_NTF3_SIGNALING_VIA_INSR_AND_IGF1R_UP		15	0.309476	0.804811	0.747495	1	1	1879	tags=33%, list=24%, signal=44%	-0.804811
MOHANKUMAR_HOXA1_TARGETS_DN		50	0.232751	0.804541	0.810445	1	1	994	tags=16%, list=13%, signal=18%	-0.804541
JOHNSTONE_PARVB_TARGETS_1_DN		32	0.259041	0.803014	0.767396	1	1	1533	tags=31%, list=20%, signal=39%	-0.803014
NIKOLSKY_BREAST_CANCER_12Q13_Q21_AMPLICON		25	0.272984	0.802909	0.751515	1	1	1762	tags=36%, list=23%, signal=46%	-0.802909
BYSTROEM_CORRELATED_WITH_IL5_UP		21	0.280338	0.802083	0.73161	1	1	467	tags=14%, list=6%, signal=15%	-0.802083
FONTAINE_FOLLICULAR_THYROID_ADENOMA_UP		37	0.244041	0.801748	0.790566	1	1	1436	tags=24%, list=18%, signal=30%	-0.801748
BREDEMEYER_RAG_SIGNALING_VIA_ATM_NOT_VIA_NFKB_DN		16	0.293043	0.800977	0.75	1	1	1689	tags=38%, list=22%, signal=48%	-0.800977
MARTIN_VIRAL_GPCR_SIGNALING_UP		35	0.249608	0.799774	0.782101	1	1	1677	tags=34%, list=22%, signal=43%	-0.799774
SAKAI_CHRONIC_HEPATITIS_VS_LIVER_CANCER_UP		49	0.228137	0.799656	0.836257	1	1	961	tags=18%, list=12%, signal=21%	-0.799656
WP_HEAD_AND_NECK_SQUAMOUS_CELL_CARCINOMA		39	0.239036	0.799472	0.814882	1	1	2283	tags=44%, list=29%, signal=61%	-0.799472
KEGG_REGULATION_OF_AUTOPHAGY		15	0.304555	0.798408	0.75	1	1	2401	tags=47%, list=31%, signal=67%	-0.798408
WP_NONALCOHOLIC_FATTY_LIVER_DISEASE		90	0.208238	0.797646	0.896282	1	1	2283	tags=34%, list=29%, signal=48%	-0.797646
TARTE_PLASMA_CELL_VS_B_LYMPHOCYTE_UP		43	0.233766	0.797584	0.808383	1	1	1355	tags=23%, list=17%, signal=28%	-0.797584
SCHAEFFER_PROSTATE_DEVELOPMENT_AND_CANCER_BOX4_DN		22	0.273904	0.79753	0.772908	1	1	655	tags=9%, list=8%, signal=10%	-0.79753
JINESH_BLEBBISHIELD_TRANSFORMED_STEM_CELL_SPHERES_DN		106	0.200549	0.797248	0.904085	1	1	977	tags=14%, list=13%, signal=16%	-0.797248
ZHONG_RESPONSE_TO_AZACITIDINE_AND_TSA_DN		42	0.237188	0.797157	0.80705	1	1	660	tags=12%, list=8%, signal=13%	-0.797157
BEGUM_TARGETS_OF_PAX3_FOXO1_FUSION_DN		15	0.298256	0.796957	0.729249	1	1	1487	tags=47%, list=19%, signal=58%	-0.796957
KAUFFMANN_DNA_REPLICATION_GENES		71	0.213941	0.795931	0.864706	1	1	1200	tags=18%, list=15%, signal=21%	-0.795931
REACTOME_SEMAPHORIN_INTERACTIONS		37	0.244106	0.795735	0.781496	1	1	2561	tags=46%, list=33%, signal=68%	-0.795735
YAO_TEMPORAL_RESPONSE_TO_PROGESTERONE_CLUSTER_12		51	0.229638	0.795566	0.84375	1	1	1458	tags=22%, list=19%, signal=26%	-0.795566
KIM_GASTRIC_CANCER_CHEMOSENSITIVITY		41	0.239676	0.79536	0.806513	1	1	714	tags=12%, list=9%, signal=13%	-0.79536
STREICHER_LSM1_TARGETS_UP		17	0.285141	0.794491	0.772819	1	1	21	tags=6%, list=0%, signal=6%	-0.794491
BYSTRYKH_HEMATOPOIESIS_STEM_CELL_AND_BRAIN_QTL_CIS		52	0.228049	0.794454	0.829959	1	1	1376	tags=21%, list=18%, signal=26%	-0.794454
GARCIA_TARGETS_OF_FLI1_AND_DAX1_DN		80	0.209305	0.793931	0.862275	1	1	1085	tags=18%, list=14%, signal=20%	-0.793931
YAO_TEMPORAL_RESPONSE_TO_PROGESTERONE_CLUSTER_2		22	0.272055	0.793337	0.763462	1	1	25	tags=5%, list=0%, signal=5%	-0.793337
RUAN_RESPONSE_TO_TNF_TROGLITAZONE_DN		18	0.285151	0.792281	0.772819	1	1	2344	tags=44%, list=30%, signal=63%	-0.792281
MANNE_COVID19_NONICU_VS_HEALTHY_DONOR_PLATELETS_UP		52	0.226674	0.792192	0.840149	1	1	613	tags=12%, list=8%, signal=12%	-0.792192
NAKAMURA_CANCER_MICROENVIRONMENT_DN		25	0.2607	0.792111	0.787946	1	1	2743	tags=48%, list=35%, signal=74%	-0.792111
REACTOME_CONSTITUTIVE_SIGNALING_BY_ABERRANT_PI3K_IN_CANCER		26	0.265694	0.790873	0.779661	1	1	1347	tags=23%, list=17%, signal=28%	-0.790873
LU_EZH2_TARGETS_DN		192	0.18561	0.790849	0.970425	1	1	1200	tags=17%, list=15%, signal=19%	-0.790849
JINESH_BLEBBISHIELD_VS_LIVE_CONTROL_DN		123	0.193316	0.790231	0.930502	1	1	710	tags=11%, list=9%, signal=11%	-0.790231
JAZAERI_BREAST_CANCER_BRCA1_VS_BRCA2_UP		28	0.2569	0.789851	0.796407	1	1	2070	tags=36%, list=27%, signal=48%	-0.789851
SHEPARD_BMYB_MORPHOLINO_UP		124	0.194339	0.789385	0.914397	1	1	2080	tags=28%, list=27%, signal=38%	-0.789385
WP_SYNAPTIC_SIGNALING_PATHWAYS_ASSOCIATED_WITH_AUTISM_SPECTRUM_DISORDER		33	0.249613	0.787966	0.806982	1	1	2236	tags=42%, list=29%, signal=59%	-0.787966
WP_INTERLEUKIN11_SIGNALING_PATHWAY		22	0.273236	0.78793	0.786561	1	1	556	tags=14%, list=7%, signal=15%	-0.78793
KEGG_PPAR_SIGNALING_PATHWAY		33	0.251467	0.786679	0.798371	1	1	363	tags=9%, list=5%, signal=9%	-0.786679
KEGG_ALZHEIMERS_DISEASE		103	0.200589	0.786171	0.902033	1	1	677	tags=11%, list=9%, signal=12%	-0.786171
HOSHIDA_LIVER_CANCER_SUBCLASS_S2		77	0.206126	0.786084	0.893822	1	1	1928	tags=27%, list=25%, signal=36%	-0.786084
PID_FAS_PATHWAY		26	0.262821	0.785037	0.802419	1	1	2110	tags=46%, list=27%, signal=63%	-0.785037
REACTOME_RET_SIGNALING		22	0.268622	0.784782	0.807836	1	1	2814	tags=45%, list=36%, signal=71%	-0.784782
WP_OXIDATIVE_PHOSPHORYLATION		35	0.247195	0.784499	0.828125	1	1	677	tags=11%, list=9%, signal=12%	-0.784499
MULLIGHAN_NPM1_MUTATED_SIGNATURE_1_UP		122	0.192486	0.783896	0.947162	1	1	2039	tags=31%, list=26%, signal=42%	-0.783896
BROWNE_HCMV_INFECTION_18HR_UP		96	0.20092	0.783224	0.908752	1	1	1457	tags=21%, list=19%, signal=25%	-0.783224
WP_EGFR_TYROSINE_KINASE_INHIBITOR_RESISTANCE		45	0.226537	0.782694	0.827068	1	1	2242	tags=38%, list=29%, signal=53%	-0.782694
NGUYEN_NOTCH1_TARGETS_UP		19	0.282405	0.782544	0.768317	1	1	354	tags=11%, list=5%, signal=11%	-0.782544
THILLAINADESAN_ZNF217_TARGETS_UP		20	0.276058	0.782426	0.803536	1	1	1465	tags=30%, list=19%, signal=37%	-0.782426
KEGG_LONG_TERM_DEPRESSION		27	0.254724	0.780604	0.807466	1	1	2278	tags=37%, list=29%, signal=52%	-0.780604
REACTOME_SIGNALING_BY_GPCR		207	0.17973	0.780068	0.962406	1	1	1847	tags=25%, list=24%, signal=31%	-0.780068
PID_BMP_PATHWAY		15	0.29822	0.779585	0.780822	1	1	1102	tags=20%, list=14%, signal=23%	-0.779585
WP_BREAST_CANCER_PATHWAY		51	0.223552	0.779405	0.875486	1	1	868	tags=14%, list=11%, signal=15%	-0.779405
REACTOME_INTRINSIC_PATHWAY_FOR_APOPTOSIS		23	0.266614	0.778844	0.793307	1	1	1293	tags=26%, list=17%, signal=31%	-0.778844
JAZAG_TGFB1_SIGNALING_UP		48	0.225457	0.776807	0.83209	1	1	1425	tags=23%, list=18%, signal=28%	-0.776807
PEDERSEN_METASTASIS_BY_ERBB2_ISOFORM_4		39	0.237207	0.776461	0.831776	1	1	638	tags=10%, list=8%, signal=11%	-0.776461
BILD_SRC_ONCOGENIC_SIGNATURE		31	0.248447	0.776287	0.80916	1	1	1386	tags=26%, list=18%, signal=31%	-0.776287
BROWNE_HCMV_INFECTION_8HR_UP		44	0.228788	0.776251	0.88247	1	1	1323	tags=20%, list=17%, signal=24%	-0.776251
SHIPP_DLBCL_CURED_VS_FATAL_DN		21	0.272324	0.776	0.814596	1	1	1735	tags=24%, list=22%, signal=31%	-0.776
PYEON_CANCER_HEAD_AND_NECK_VS_CERVICAL_UP		79	0.207219	0.775495	0.898855	1	1	121	tags=4%, list=2%, signal=4%	-0.775495
TIEN_INTESTINE_PROBIOTICS_6HR_DN		104	0.196756	0.775238	0.925725	1	1	1426	tags=17%, list=18%, signal=21%	-0.775238
IWANAGA_CARCINOGENESIS_BY_KRAS_DN		54	0.218765	0.775102	0.84749	1	1	1647	tags=22%, list=21%, signal=28%	-0.775102
GHANDHI_DIRECT_IRRADIATION_UP		20	0.273151	0.77501	0.79588	1	1	1734	tags=40%, list=22%, signal=51%	-0.77501
FIGUEROA_AML_METHYLATION_CLUSTER_6_UP		64	0.214675	0.774537	0.88447	1	1	1666	tags=27%, list=21%, signal=33%	-0.774537
WP_NEURODEGENERATION_WITH_BRAIN_IRON_ACCUMULATION_NBIA_SUBTYPES_PATHWAY		39	0.236005	0.774007	0.855186	1	1	1531	tags=28%, list=20%, signal=35%	-0.774007
REACTOME_MTORC1_MEDIATED_SIGNALLING		18	0.283585	0.773374	0.771318	1	1	1468	tags=28%, list=19%, signal=34%	-0.773374
REACTOME_LATE_ENDOSOMAL_MICROAUTOPHAGY		22	0.268657	0.772642	0.787149	1	1	1258	tags=27%, list=16%, signal=32%	-0.772642
ACEVEDO_LIVER_CANCER_WITH_H3K9ME3_DN		29	0.247755	0.772596	0.805118	1	1	513	tags=10%, list=7%, signal=11%	-0.772596
RODRIGUES_DCC_TARGETS_DN		61	0.217499	0.772547	0.894545	1	1	1694	tags=30%, list=22%, signal=37%	-0.772547
KEGG_ADIPOCYTOKINE_SIGNALING_PATHWAY		34	0.241904	0.772269	0.865019	1	1	816	tags=12%, list=10%, signal=13%	-0.772269
REACTOME_RRNA_PROCESSING		163	0.186095	0.771639	0.959707	1	1	2208	tags=31%, list=28%, signal=42%	-0.771639
HWANG_PROSTATE_CANCER_MARKERS		18	0.279702	0.77074	0.791667	1	1	1956	tags=39%, list=25%, signal=52%	-0.77074
ZHOU_CELL_CYCLE_GENES_IN_IR_RESPONSE_24HR		46	0.228193	0.770612	0.85	1	1	1615	tags=26%, list=21%, signal=33%	-0.770612
LI_INDUCED_T_TO_NATURAL_KILLER_DN		62	0.212355	0.770045	0.876569	1	1	1528	tags=18%, list=20%, signal=22%	-0.770045
CHESLER_BRAIN_QTL_CIS		49	0.225079	0.770024	0.880325	1	1	1677	tags=29%, list=22%, signal=36%	-0.770024
LENAOUR_DENDRITIC_CELL_MATURATION_UP		46	0.226758	0.769843	0.853659	1	1	1284	tags=22%, list=16%, signal=26%	-0.769843
EPPERT_LSC_R		19	0.278094	0.76959	0.7833	1	1	1454	tags=32%, list=19%, signal=39%	-0.76959
XU_CREBBP_TARGETS_DN		20	0.268763	0.769323	0.778641	1	1	1836	tags=35%, list=24%, signal=46%	-0.769323
FIRESTEIN_CTNNB1_PATHWAY		16	0.288028	0.767449	0.795367	1	1	155	tags=6%, list=2%, signal=6%	-0.767449
MIKKELSEN_MCV6_LCP_WITH_H3K4ME3		54	0.218161	0.767411	0.851429	1	1	1493	tags=24%, list=19%, signal=30%	-0.767411
MCBRYAN_PUBERTAL_BREAST_3_4WK_DN		22	0.266102	0.766347	0.794411	1	1	933	tags=23%, list=12%, signal=26%	-0.766347
KOBAYASHI_EGFR_SIGNALING_24HR_DN		70	0.205274	0.765553	0.910134	1	1	1736	tags=24%, list=22%, signal=31%	-0.765553
TIEN_INTESTINE_PROBIOTICS_6HR_UP		36	0.239912	0.765492	0.83501	1	1	2145	tags=33%, list=28%, signal=46%	-0.765492
ZHU_CMV_ALL_UP		55	0.216569	0.765091	0.876471	1	1	1354	tags=22%, list=17%, signal=26%	-0.765091
BENPORATH_OCT4_TARGETS		147	0.183684	0.764176	0.96578	1	1	2071	tags=30%, list=27%, signal=40%	-0.764176
PID_IL8_CXCR1_PATHWAY		16	0.284767	0.762175	0.770791	1	1	2683	tags=56%, list=34%, signal=86%	-0.762175
REACTOME_RESOLUTION_OF_AP_SITES_VIA_THE_MULTIPLE_NUCLEOTIDE_PATCH_REPLACEMENT_PATHWAY		16	0.287728	0.761639	0.781746	1	1	1613	tags=31%, list=21%, signal=39%	-0.761639
PID_ERBB1_INTERNALIZATION_PATHWAY		29	0.24468	0.761573	0.832685	1	1	2234	tags=31%, list=29%, signal=43%	-0.761573
BIOCARTA_RAC1_PATHWAY		15	0.290946	0.760746	0.800412	1	1	914	tags=20%, list=12%, signal=23%	-0.760746
REACTOME_DUAL_INCISION_IN_TC_NER		46	0.224731	0.760115	0.860279	1	1	1251	tags=20%, list=16%, signal=23%	-0.760115
KEGG_NON_SMALL_CELL_LUNG_CANCER		24	0.257042	0.759477	0.811024	1	1	2234	tags=42%, list=29%, signal=58%	-0.759477
SANA_RESPONSE_TO_IFNG_DN		53	0.218101	0.75916	0.908592	1	1	683	tags=13%, list=9%, signal=14%	-0.75916
DUTERTRE_ESTRADIOL_RESPONSE_6HR_UP		105	0.190315	0.758657	0.936538	1	1	1940	tags=29%, list=25%, signal=38%	-0.758657
STONER_ESOPHAGEAL_CARCINOGENESIS_UP		22	0.256696	0.757424	0.807767	1	1	1540	tags=32%, list=20%, signal=40%	-0.757424
WILCOX_RESPONSE_TO_PROGESTERONE_DN		17	0.275454	0.75728	0.826176	1	1	254	tags=12%, list=3%, signal=12%	-0.75728
REACTOME_SIGNALING_BY_PTK6		24	0.249462	0.757072	0.807692	1	1	1474	tags=25%, list=19%, signal=31%	-0.757072
DEBIASI_APOPTOSIS_BY_REOVIRUS_INFECTION_UP		148	0.18298	0.756427	0.976699	1	1	1799	tags=23%, list=23%, signal=29%	-0.756427
BILANGES_SERUM_RESPONSE_TRANSLATION		24	0.255522	0.755353	0.84	1	1	700	tags=13%, list=9%, signal=14%	-0.755353
WP_RESISTIN_AS_A_REGULATOR_OF_INFLAMMATION		21	0.263047	0.755131	0.840319	1	1	1230	tags=19%, list=16%, signal=23%	-0.755131
LANDIS_ERBB2_BREAST_TUMORS_324_UP		67	0.203633	0.754638	0.913603	1	1	2017	tags=27%, list=26%, signal=36%	-0.754638
PID_MET_PATHWAY		55	0.211784	0.75239	0.917603	1	1	2739	tags=55%, list=35%, signal=83%	-0.75239
REACTOME_INTERLEUKIN_12_FAMILY_SIGNALING		31	0.240849	0.751518	0.836978	1	1	1628	tags=26%, list=21%, signal=32%	-0.751518
REACTOME_MITOTIC_SPINDLE_CHECKPOINT		56	0.21266	0.750838	0.895954	1	1	1654	tags=27%, list=21%, signal=34%	-0.750838
WP_NONGENOMIC_ACTIONS_OF_125_DIHYDROXYVITAMIN_D3		29	0.241092	0.750265	0.854991	1	1	117	tags=7%, list=2%, signal=7%	-0.750265
REACTOME_TRANSCRIPTIONAL_ACTIVATION_OF_MITOCHONDRIAL_BIOGENESIS		32	0.236436	0.749556	0.862669	1	1	1784	tags=31%, list=23%, signal=40%	-0.749556
REACTOME_RNA_POLYMERASE_I_PROMOTER_ESCAPE		20	0.273511	0.749234	0.806142	1	1	296	tags=10%, list=4%, signal=10%	-0.749234
REACTOME_BASE_EXCISION_REPAIR		24	0.252998	0.749116	0.844278	1	1	1613	tags=25%, list=21%, signal=31%	-0.749116
LEE_LIVER_CANCER_MYC_TGFA_UP		25	0.251984	0.747597	0.830339	1	1	395	tags=12%, list=5%, signal=13%	-0.747597
REACTOME_PROCESSING_OF_DNA_DOUBLE_STRAND_BREAK_ENDS		27	0.243891	0.746769	0.830855	1	1	354	tags=11%, list=5%, signal=12%	-0.746769
GROSS_HYPOXIA_VIA_ELK3_AND_HIF1A_DN		52	0.213932	0.746766	0.915832	1	1	130	tags=6%, list=2%, signal=6%	-0.746766
MORI_SMALL_PRE_BII_LYMPHOCYTE_DN		37	0.228245	0.744674	0.879276	1	1	762	tags=16%, list=10%, signal=18%	-0.744674
ZHENG_BOUND_BY_FOXP3		235	0.168102	0.74414	0.990724	1	1	1372	tags=17%, list=18%, signal=20%	-0.74414
QUINTENS_EMBRYONIC_BRAIN_RESPONSE_TO_IR		36	0.233048	0.743464	0.875969	1	1	1760	tags=25%, list=23%, signal=32%	-0.743464
KEGG_RIG_I_LIKE_RECEPTOR_SIGNALING_PATHWAY		32	0.234397	0.743072	0.83953	1	1	1943	tags=31%, list=25%, signal=41%	-0.743072
BLANCO_MELO_BETA_INTERFERON_TREATED_BRONCHIAL_EPITHELIAL_CELLS_UP		126	0.181448	0.742286	0.975096	1	1	537	tags=8%, list=7%, signal=8%	-0.742286
WP_NOVEL_INTRACELLULAR_COMPONENTS_OF_RIGILIKE_RECEPTOR_PATHWAY		33	0.232863	0.741735	0.864754	1	1	1943	tags=30%, list=25%, signal=40%	-0.741735
MEISSNER_BRAIN_ICP_WITH_H3K4ME3		15	0.290001	0.74142	0.8	1	1	604	tags=13%, list=8%, signal=14%	-0.74142
WP_CLEAR_CELL_RENAL_CELL_CARCINOMA_PATHWAYS		50	0.214946	0.74139	0.883495	1	1	2010	tags=36%, list=26%, signal=48%	-0.74139
MOOTHA_VOXPHOS		63	0.202212	0.741191	0.93597	1	1	2220	tags=30%, list=28%, signal=42%	-0.741191
CHANGOLKAR_H2AFY_TARGETS_UP		26	0.246541	0.740357	0.851107	1	1	1005	tags=19%, list=13%, signal=22%	-0.740357
BURTON_ADIPOGENESIS_3		31	0.234925	0.739518	0.864971	1	1	1129	tags=23%, list=14%, signal=26%	-0.739518
REACTOME_NOTCH1_INTRACELLULAR_DOMAIN_REGULATES_TRANSCRIPTION		21	0.252238	0.738392	0.876543	1	1	1033	tags=19%, list=13%, signal=22%	-0.738392
HILLION_HMGA1_TARGETS		45	0.219692	0.738217	0.9	1	1	2049	tags=40%, list=26%, signal=54%	-0.738217
REACTOME_RESOLUTION_OF_ABASIC_SITES_AP_SITES		21	0.259912	0.737504	0.839768	1	1	1613	tags=29%, list=21%, signal=36%	-0.737504
REACTOME_DDX58_IFIH1_MEDIATED_INDUCTION_OF_INTERFERON_ALPHA_BETA		42	0.216692	0.737128	0.888668	1	1	1644	tags=26%, list=21%, signal=33%	-0.737128
GOLDRATH_IMMUNE_MEMORY		31	0.238507	0.736966	0.88998	1	1	1426	tags=26%, list=18%, signal=31%	-0.736966
REACTOME_NEGATIVE_EPIGENETIC_REGULATION_OF_RRNA_EXPRESSION		28	0.241384	0.736715	0.834343	1	1	516	tags=11%, list=7%, signal=11%	-0.736715
RIEGE_DELTANP63_DIRECT_TARGETS_UP		60	0.203868	0.736485	0.911157	1	1	1391	tags=20%, list=18%, signal=24%	-0.736485
CHOI_ATL_STAGE_PREDICTOR		23	0.251149	0.735544	0.855513	1	1	1903	tags=39%, list=24%, signal=52%	-0.735544
WP_ONECARBON_METABOLISM		15	0.283207	0.735337	0.8125	1	1	1736	tags=27%, list=22%, signal=34%	-0.735337
PID_VEGFR1_PATHWAY		18	0.268018	0.734067	0.851927	1	1	1556	tags=28%, list=20%, signal=35%	-0.734067
NIKOLSKY_BREAST_CANCER_17Q11_Q21_AMPLICON		59	0.204281	0.733792	0.923664	1	1	2212	tags=34%, list=28%, signal=47%	-0.733792
BILD_HRAS_ONCOGENIC_SIGNATURE		87	0.1925	0.73377	0.957774	1	1	766	tags=11%, list=10%, signal=13%	-0.73377
KOKKINAKIS_METHIONINE_DEPRIVATION_48HR_UP		55	0.203689	0.733321	0.920543	1	1	753	tags=13%, list=10%, signal=14%	-0.733321
WP_PDGFRBETA_PATHWAY		18	0.266968	0.732591	0.833962	1	1	831	tags=17%, list=11%, signal=19%	-0.732591
REACTOME_TBC_RABGAPS		28	0.238233	0.732252	0.860835	1	1	1890	tags=25%, list=24%, signal=33%	-0.732252
MATZUK_SPERMATOZOA		54	0.209416	0.73184	0.928705	1	1	1810	tags=20%, list=23%, signal=26%	-0.73184
KEGG_VALINE_LEUCINE_AND_ISOLEUCINE_DEGRADATION		38	0.220507	0.731371	0.901186	1	1	1364	tags=18%, list=17%, signal=22%	-0.731371
WP_MESODERMAL_COMMITMENT_PATHWAY		52	0.208064	0.7313	0.926276	1	1	1541	tags=19%, list=20%, signal=24%	-0.7313
SIG_REGULATION_OF_THE_ACTIN_CYTOSKELETON_BY_RHO_GTPASES		18	0.265788	0.730109	0.82197	1	1	1845	tags=33%, list=24%, signal=44%	-0.730109
BREDEMEYER_RAG_SIGNALING_NOT_VIA_ATM_UP		23	0.249981	0.729472	0.861163	1	1	866	tags=13%, list=11%, signal=15%	-0.729472
HOLLEMAN_VINCRISTINE_RESISTANCE_B_ALL_UP		21	0.255557	0.728508	0.849711	1	1	1487	tags=24%, list=19%, signal=29%	-0.728508
REACTOME_CYTOPROTECTION_BY_HMOX1		37	0.226371	0.728292	0.8778	1	1	1117	tags=19%, list=14%, signal=22%	-0.728292
ZHAN_MULTIPLE_MYELOMA_MS_DN		19	0.264877	0.728259	0.848249	1	1	885	tags=16%, list=11%, signal=18%	-0.728259
REACTOME_MRNA_CAPPING		26	0.24221	0.727893	0.852156	1	1	296	tags=8%, list=4%, signal=8%	-0.727893
KEGG_WNT_SIGNALING_PATHWAY		59	0.203834	0.727843	0.939279	1	1	2758	tags=47%, list=35%, signal=73%	-0.727843
KEGG_VASCULAR_SMOOTH_MUSCLE_CONTRACTION		43	0.213961	0.727267	0.908582	1	1	1230	tags=19%, list=16%, signal=22%	-0.727267
JAZAERI_BREAST_CANCER_BRCA1_VS_BRCA2_DN		22	0.246027	0.726109	0.866126	1	1	399	tags=14%, list=5%, signal=14%	-0.726109
FLECHNER_PBL_KIDNEY_TRANSPLANT_OK_VS_DONOR_UP		102	0.188174	0.726006	0.958498	1	1	1010	tags=14%, list=13%, signal=16%	-0.726006
WP_EPO_RECEPTOR_SIGNALING		15	0.272066	0.725869	0.851562	1	1	1175	tags=20%, list=15%, signal=24%	-0.725869
MALONEY_RESPONSE_TO_17AAG_DN		51	0.209703	0.72495	0.921154	1	1	1660	tags=27%, list=21%, signal=35%	-0.72495
REACTOME_SIGNALING_BY_FGFR4		19	0.254948	0.723837	0.845098	1	1	2234	tags=47%, list=29%, signal=66%	-0.723837
LENAOUR_DENDRITIC_CELL_MATURATION_DN		54	0.207125	0.723535	0.915686	1	1	1638	tags=22%, list=21%, signal=28%	-0.723535
LEE_METASTASIS_AND_ALTERNATIVE_SPLICING_UP		27	0.240717	0.723265	0.884393	1	1	1539	tags=30%, list=20%, signal=37%	-0.723265
REACTOME_CITRIC_ACID_CYCLE_TCA_CYCLE		19	0.263006	0.723123	0.868627	1	1	2220	tags=32%, list=28%, signal=44%	-0.723123
PID_HIV_NEF_PATHWAY		19	0.260081	0.722409	0.852156	1	1	2283	tags=47%, list=29%, signal=67%	-0.722409
KEGG_CYTOKINE_CYTOKINE_RECEPTOR_INTERACTION		24	0.242595	0.722327	0.863724	1	1	1763	tags=29%, list=23%, signal=38%	-0.722327
PID_PS1_PATHWAY		24	0.243307	0.722194	0.828343	1	1	1307	tags=21%, list=17%, signal=25%	-0.722194
[truncated: 1,990 more rows]

## Sheet: WT over M2145T
NAME	GS DETAILS	SIZE	ES	NES	NOM p-val	FDR q-val	FWER p-val	RANK AT MAX	LEADING EDGE	NES (Mut/WT)
[truncated: 3,266 more rows]
